# Supplementary material
Source: PubMed Central journal article supplement (PMC4651627)

## Supporting Information for:

# Total Synthesis and Biological Evaluation of Ipomoeassin F and Its Unnatural *11R*-Epimer

Guanghai Zong,<sup>†</sup> Eric Barber,<sup>†</sup> Hazim Aljewari,<sup>†</sup> Jianhong Zhou,<sup>‡</sup> Zhijian Hu,<sup>†</sup>  
Yuchun Du,<sup>‡</sup> and Wei Q. Shi<sup>\*†</sup>

<sup>†</sup>Department of Chemistry and Biochemistry, and <sup>‡</sup>Department of Biological Sciences, J.  
William Fulbright College of Arts & Science, University of Arkansas, Fayetteville, Arkansas,  
72701, USA. E-mail: weishi@uark.edu; Tel: 479-575-2294

## Table of Content

|    |                                                     |     |
|----|-----------------------------------------------------|-----|
| 1  | <sup>1</sup> H NMR spectrum of compound <b>3</b>    | S4  |
| 2  | <sup>13</sup> C NMR spectrum of compound <b>3</b>   | S5  |
| 3  | <sup>1</sup> H NMR spectrum of compound <b>6a</b>   | S6  |
| 4  | <sup>13</sup> C NMR spectrum of compound <b>6a</b>  | S7  |
| 5  | <sup>1</sup> H NMR spectrum of compound <b>24</b>   | S8  |
| 6  | <sup>13</sup> C NMR spectrum of compound <b>24</b>  | S9  |
| 7  | COSY NMR spectrum of compound <b>24</b>             | S10 |
| 8  | <sup>1</sup> H NMR spectrum of compound <b>6b</b>   | S11 |
| 9  | <sup>13</sup> C NMR spectrum of compound <b>6b</b>  | S12 |
| 10 | COSY NMR spectrum of compound <b>6b</b>             | S13 |
| 11 | <sup>1</sup> H NMR spectrum of compound <b>7a</b>   | S14 |
| 12 | <sup>13</sup> C NMR spectrum of compound <b>7a</b>  | S15 |
| 13 | COSY NMR spectrum of compound <b>7a</b>             | S16 |
| 14 | HSQC NMR spectrum of compound <b>7a</b>             | S17 |
| 15 | HMBC NMR spectrum of compound <b>7a</b>             | S18 |
| 16 | <sup>1</sup> H NMR spectrum of compound <b>7b</b>   | S19 |
| 17 | <sup>13</sup> C NMR spectrum of compound <b>7b</b>  | S20 |
| 18 | COSY NMR spectrum of compound <b>7b</b>             | S21 |
| 19 | HSQC NMR spectrum of compound <b>7b</b>             | S22 |
| 20 | HMBC NMR spectrum of compound <b>7b</b>             | S23 |
| 21 | <sup>1</sup> H NMR spectrum of compound <b>9a</b>   | S24 |
| 22 | <sup>13</sup> C NMR spectrum of compound <b>9a</b>  | S25 |
| 23 | COSY NMR spectrum of compound <b>9a</b>             | S26 |
| 24 | HSQC NMR spectrum of compound <b>9a</b>             | S27 |
| 25 | <sup>1</sup> H NMR spectrum of compound <b>9b</b>   | S28 |
| 26 | <sup>13</sup> C NMR spectrum of compound <b>9b</b>  | S29 |
| 27 | <sup>1</sup> H NMR spectrum of compound <b>10a</b>  | S30 |
| 28 | <sup>13</sup> C NMR spectrum of compound <b>10a</b> | S31 |
| 29 | COSY NMR spectrum of compound <b>10a</b>            | S32 |

|    |                                                     |     |
|----|-----------------------------------------------------|-----|
| 30 | HSQC NMR spectrum of compound <b>10a</b>            | S33 |
| 31 | <sup>1</sup> H NMR spectrum of compound <b>10b</b>  | S34 |
| 32 | <sup>13</sup> C NMR spectrum of compound <b>10b</b> | S35 |
| 33 | <sup>1</sup> H NMR spectrum of compound <b>13</b>   | S36 |
| 34 | <sup>13</sup> C NMR spectrum of compound <b>13</b>  | S37 |
| 35 | COSY NMR spectrum of compound <b>13</b>             | S38 |
| 36 | HSQC NMR spectrum of compound <b>13</b>             | S39 |
| 37 | <sup>1</sup> H NMR spectrum of compound <b>14</b>   | S40 |
| 38 | <sup>13</sup> C NMR spectrum of compound <b>14</b>  | S41 |
| 39 | COSY NMR spectrum of compound <b>14</b>             | S42 |
| 40 | <sup>1</sup> H NMR spectrum of compound <b>15</b>   | S43 |
| 41 | <sup>13</sup> C NMR spectrum of compound <b>15</b>  | S44 |
| 42 | COSY NMR spectrum of compound <b>15</b>             | S45 |
| 43 | <sup>1</sup> H NMR spectrum of compound <b>16</b>   | S46 |
| 44 | <sup>13</sup> C NMR spectrum of compound <b>16</b>  | S47 |
| 45 | <sup>1</sup> H NMR spectrum of compound <b>18</b>   | S48 |
| 46 | <sup>13</sup> C NMR spectrum of compound <b>18</b>  | S49 |
| 47 | <sup>1</sup> H NMR spectrum of compound <b>19</b>   | S50 |
| 48 | <sup>13</sup> C NMR spectrum of compound <b>19</b>  | S51 |
| 49 | COSY NMR spectrum of compound <b>19</b>             | S52 |
| 50 | HSQC NMR spectrum of compound <b>19</b>             | S53 |
| 51 | <sup>1</sup> H NMR spectrum of compound <b>20</b>   | S54 |
| 52 | <sup>13</sup> C NMR spectrum of compound <b>20</b>  | S55 |
| 53 | COSY NMR spectrum of compound <b>20</b>             | S56 |
| 54 | HSQC NMR spectrum of compound <b>20</b>             | S57 |
| 55 | <sup>1</sup> H NMR spectrum of compound <b>22a</b>  | S58 |
| 56 | <sup>13</sup> C NMR spectrum of compound <b>22a</b> | S59 |
| 57 | <sup>1</sup> H NMR spectrum of compound <b>22a</b>  | S60 |
| 58 | <sup>13</sup> C NMR spectrum of compound <b>22a</b> | S61 |

|    |                                                     |        |
|----|-----------------------------------------------------|--------|
| 59 | COSY NMR spectrum of compound <b>22b</b>            | S62    |
| 60 | HSQC NMR spectrum of compound <b>22b</b>            | S63    |
| 61 | <sup>1</sup> H NMR spectrum of compound <b>23a</b>  | S64    |
| 62 | <sup>13</sup> C NMR spectrum of compound <b>23a</b> | S65    |
| 63 | COSY NMR spectrum of compound <b>23a</b>            | S66    |
| 64 | <sup>1</sup> H NMR spectrum of compound <b>23b</b>  | S67    |
| 65 | <sup>13</sup> C NMR spectrum of compound <b>23b</b> | S68    |
| 66 | COSY NMR spectrum of compound <b>23b</b>            | S69    |
| 67 | <sup>1</sup> H NMR spectrum of compound <b>25a</b>  | S70    |
| 68 | <sup>13</sup> C NMR spectrum of compound <b>25a</b> | S71    |
| 69 | COSY NMR spectrum of compound <b>25a</b>            | S72    |
| 70 | HSQC NMR spectrum of compound <b>25a</b>            | S73    |
| 71 | HMBC NMR spectrum of compound <b>25a</b>            | S74    |
| 72 | <sup>1</sup> H NMR spectrum of compound <b>25b</b>  | S75    |
| 73 | <sup>13</sup> C NMR spectrum of compound <b>25b</b> | S76    |
| 74 | <sup>1</sup> H NMR spectrum of compound <b>26a</b>  | S77    |
| 75 | <sup>13</sup> C NMR spectrum of compound <b>26a</b> | S78    |
| 76 | COSY NMR spectrum of compound <b>26a</b>            | S79    |
| 77 | HSQC NMR spectrum of compound <b>26a</b>            | S80    |
| 78 | <sup>1</sup> H NMR spectrum of compound <b>26b</b>  | S81    |
| 79 | <sup>13</sup> C NMR spectrum of compound <b>26b</b> | S82    |
| 80 | <sup>1</sup> H NMR spectrum of compound <b>27a</b>  | S83-84 |
| 81 | <sup>13</sup> C NMR spectrum of compound <b>27a</b> | S85    |
| 82 | COSY NMR spectrum of compound <b>27a</b>            | S86    |
| 83 | HSQC NMR spectrum of compound <b>27a</b>            | S87    |
| 84 | HMBC NMR spectrum of compound <b>27a</b>            | S88    |
| 85 | <sup>1</sup> H NMR spectrum of compound <b>28a</b>  | S89    |
| 86 | <sup>13</sup> C NMR spectrum of compound <b>28a</b> | S90    |
| 87 | COSY NMR spectrum of compound <b>28a</b>            | S91    |

|            |                                                      |             |
|------------|------------------------------------------------------|-------------|
| 88         | HSQC NMR spectrum of compound <b>28a</b>             | S92         |
| 89         | HMBC NMR spectrum of compound <b>28a</b>             | S93         |
| 90         | <sup>1</sup> H NMR spectrum of compound <b>29a</b>   | S94         |
| 91         | <sup>13</sup> C NMR spectrum of compound <b>29a</b>  | S95         |
| 92         | COSY NMR spectrum of compound <b>29a</b>             | S96         |
| 93         | HSQC NMR spectrum of compound <b>29a</b>             | S97         |
| 94         | <sup>1</sup> H NMR spectrum of compound <b>29b</b>   | S98         |
| 95         | <sup>13</sup> C NMR spectrum of compound <b>29b</b>  | S99         |
| 96         | HSQC NMR spectrum of compound <b>29b</b>             | S100        |
| 97         | <sup>1</sup> H NMR spectrum of compound <b>31a</b>   | S101        |
| 98         | <sup>13</sup> C NMR spectrum of compound <b>31a</b>  | S102        |
| 99         | COSY NMR spectrum of compound <b>31a</b>             | S103        |
| 100        | HSQC NMR spectrum of compound <b>31a</b>             | S104        |
| 101        | <sup>1</sup> H NMR spectrum of compound <b>31b</b>   | S105        |
| 102        | <sup>13</sup> C NMR spectrum of compound <b>31b</b>  | S106        |
| 103        | COSY NMR spectrum of compound <b>31b</b>             | S107        |
| 104        | <sup>1</sup> H NMR spectrum of <b>Ipomoeassin F</b>  | S108        |
| <b>105</b> | <sup>13</sup> C NMR spectrum of <b>Ipomoeassin F</b> | <b>S109</b> |
| 106        | COSY NMR spectrum of <b>Ipomoeassin F</b>            | S110        |
| 107        | HSQC NMR spectrum of <b>Ipomoeassin F</b>            | S111        |
| 108        | HMBC NMR spectrum of <b>Ipomoeassin F</b>            | S112        |
| 109        | HRMS spectrum of <b>Ipomoeassin F</b>                | S113        |
| 110        | <sup>1</sup> H NMR spectrum of <b>11R-Epimer</b>     | S114        |
| 111        | <sup>13</sup> C NMR spectrum of <b>11R-Epimer</b>    | S115        |
| 112        | COSY NMR spectrum of <b>11R-Epimer</b>               | S116        |
| 113        | HSQC NMR spectrum of <b>11R-Epimer</b>               | S117        |
| 114        | HRMS spectrum of <b>11R-Epimer</b>                   | S118        |
| 115        | HPLC for <b>Ipomoeassin F</b> and <b>11R-Epimer</b>  | S119        |

ZGH-*Ipom*-1-165-A-131010 1H in CDCl<sub>3</sub>

8.649  
7.271  
7.269  
6.891  
6.877  
6.873  
6.859  
6.856  
6.578  
6.568  
5.884  
5.882  
5.870  
5.857  
5.855  
5.841  
5.827  
5.814  
5.813  
5.635  
5.611  
5.587  
5.309  
5.306  
5.265  
5.263  
5.236  
5.234  
5.231  
5.210  
5.207  
5.050  
5.048  
5.040  
5.025  
5.024  
5.016  
5.014  
4.594  
4.580  
4.017  
4.005  
3.993  
3.980  
3.970  
3.965  
3.953  
3.941  
3.877  
3.853  
3.829  
3.802  
3.797  
3.773  
3.747  
1.834  
1.832  
1.815  
1.797  
1.584  
1.486  
1.425  
1.405

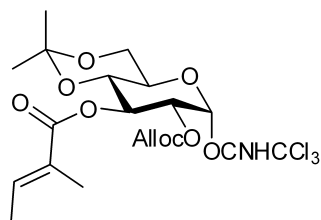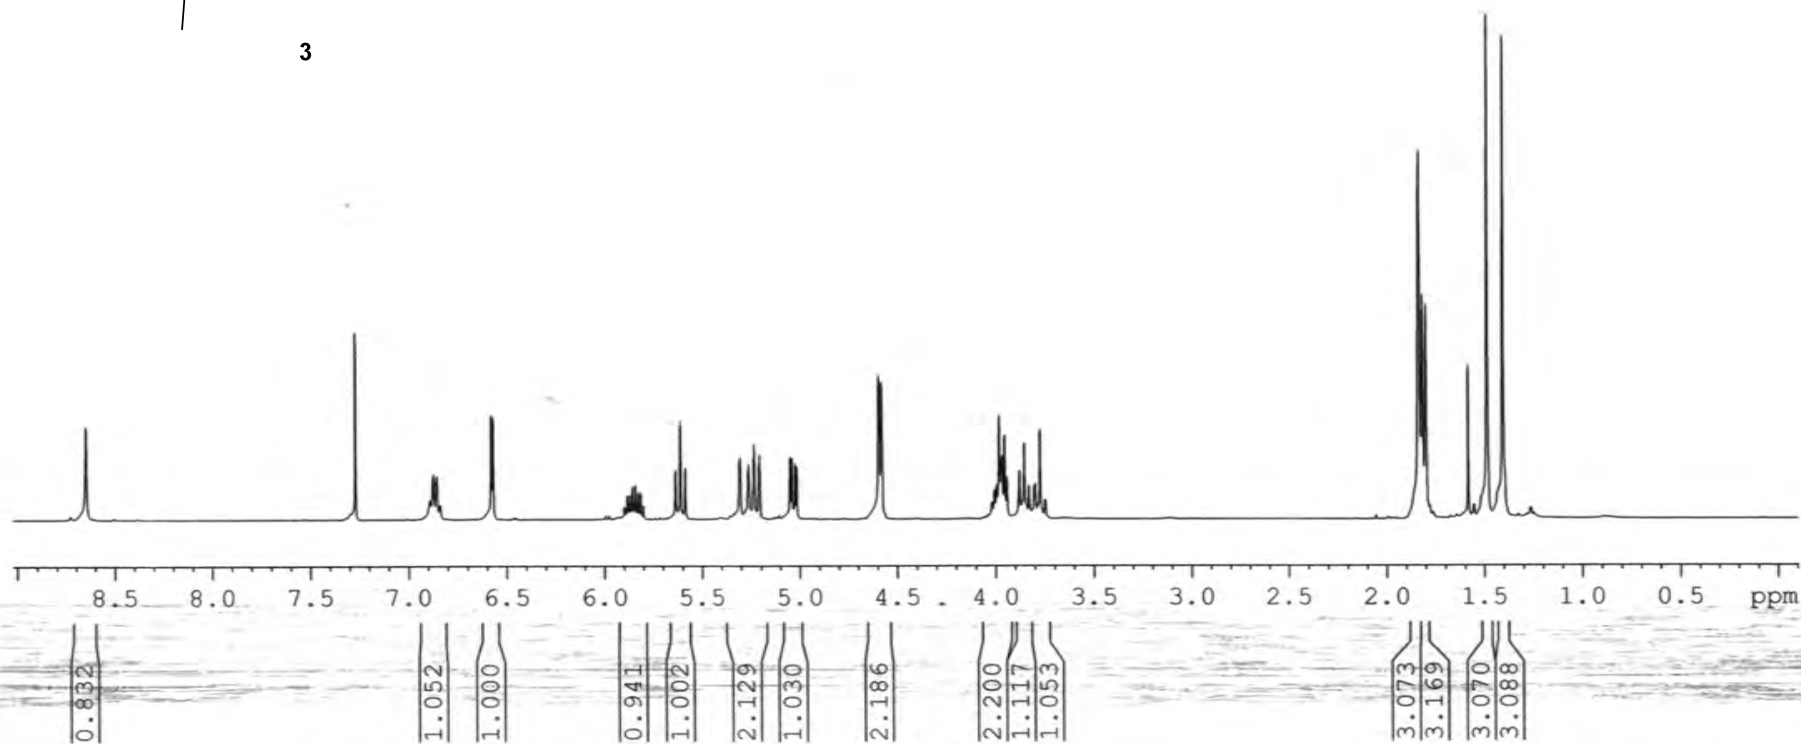

ZGH-*Ipom*-1-165-A-131010  $^{13}\text{C}$  in  $\text{CDCl}_3$ 

— 166.643  
— 154.183  
— 138.034  
— 131.113  
— 128.046  
— 118.802  
— 99.956  
— 93.570  
77.002  
76.684  
73.988  
71.649  
69.006  
68.909  
66.194  
62.023  
— 28.821  
— 18.929  
— 14.432  
— 12.117

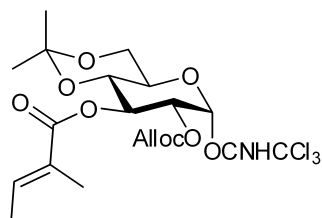

170 160 150 140 130 120 110 100 90 80 70 60 50 40 30 20 10 0 ppm

ZGH-*Ipom*-2-16-A 1H in CDCl<sub>3</sub>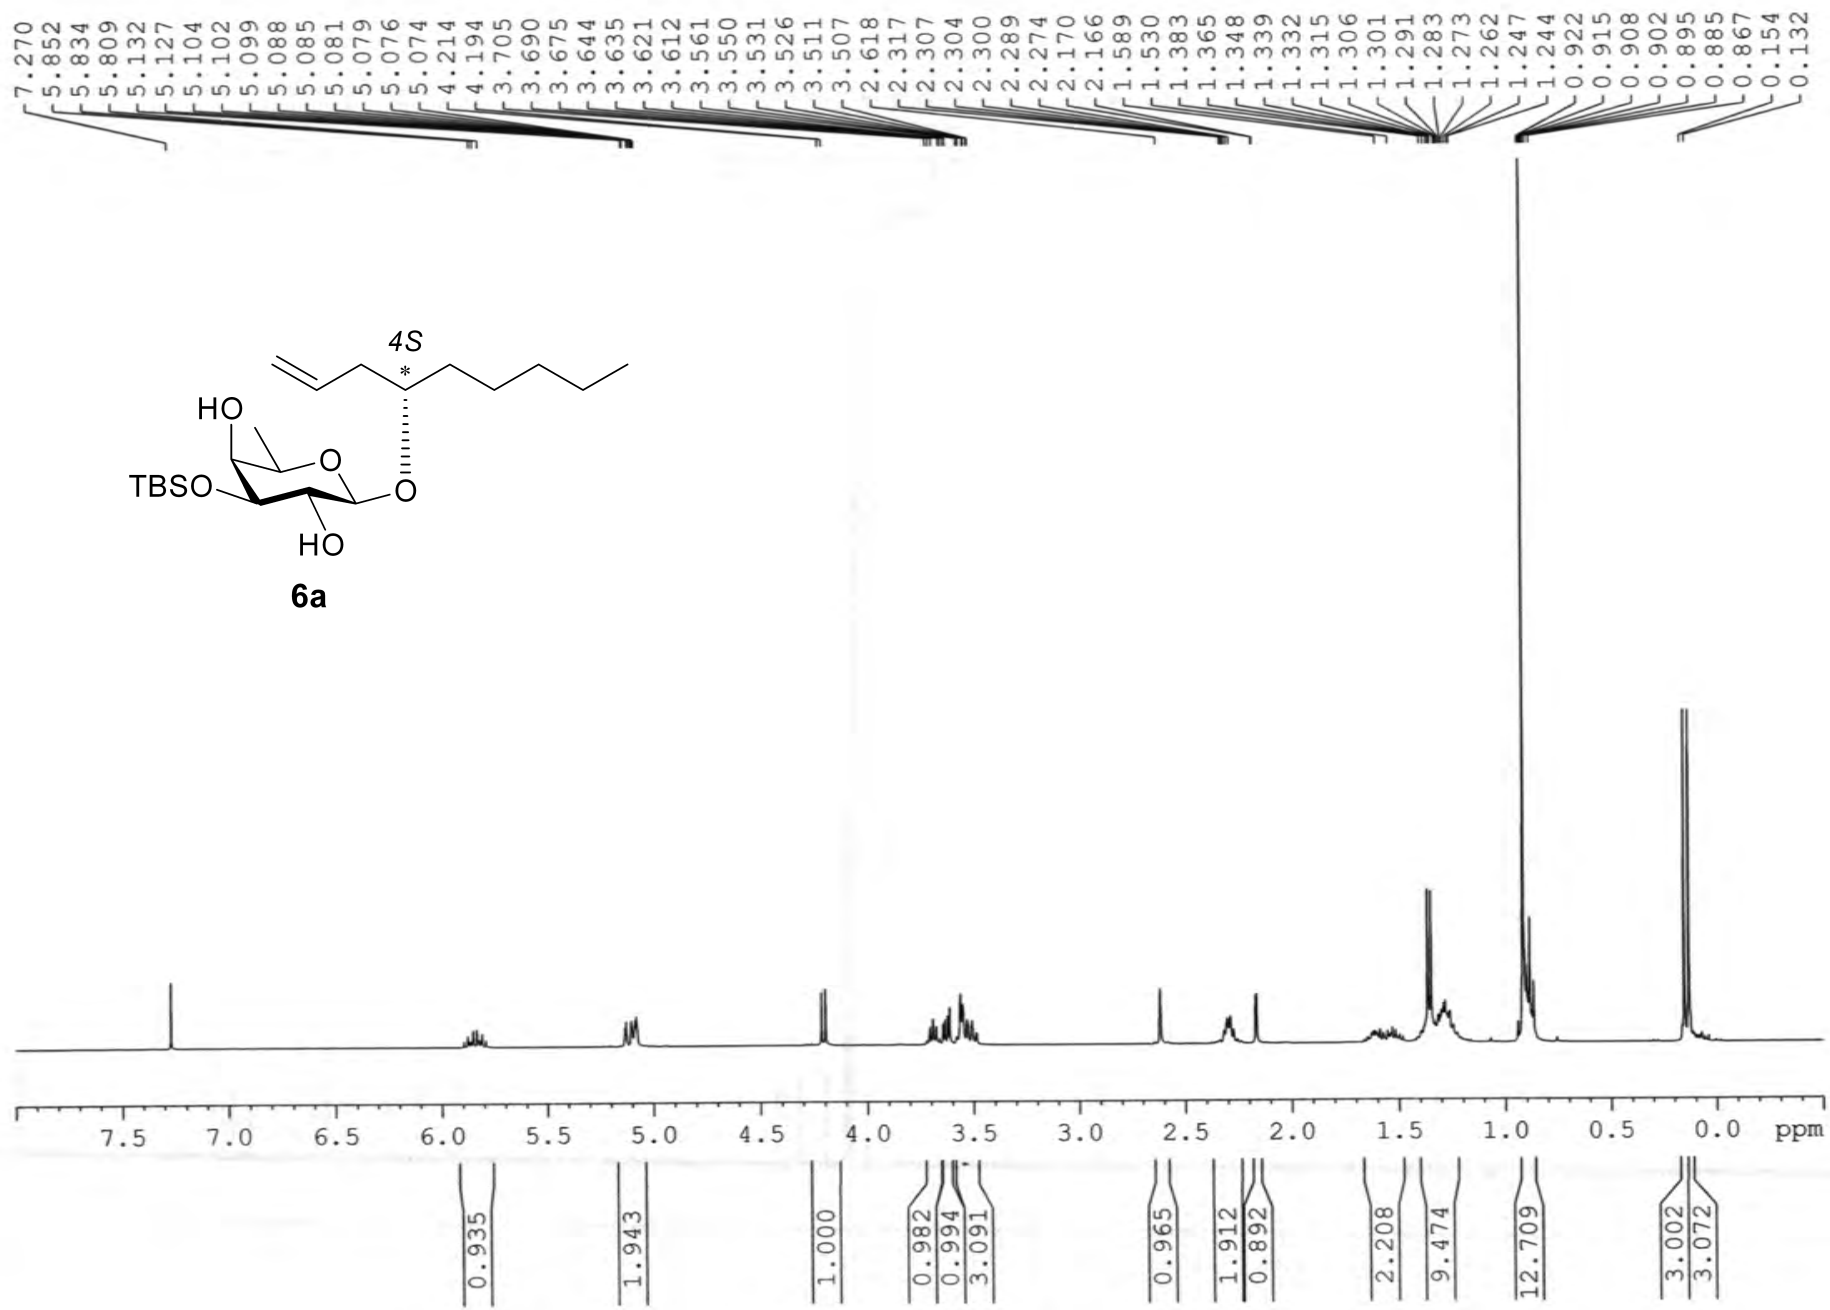

ZGH-*Ipom*-2-16-A  $^{13}\text{C}$  in  $\text{CDCl}_3$ 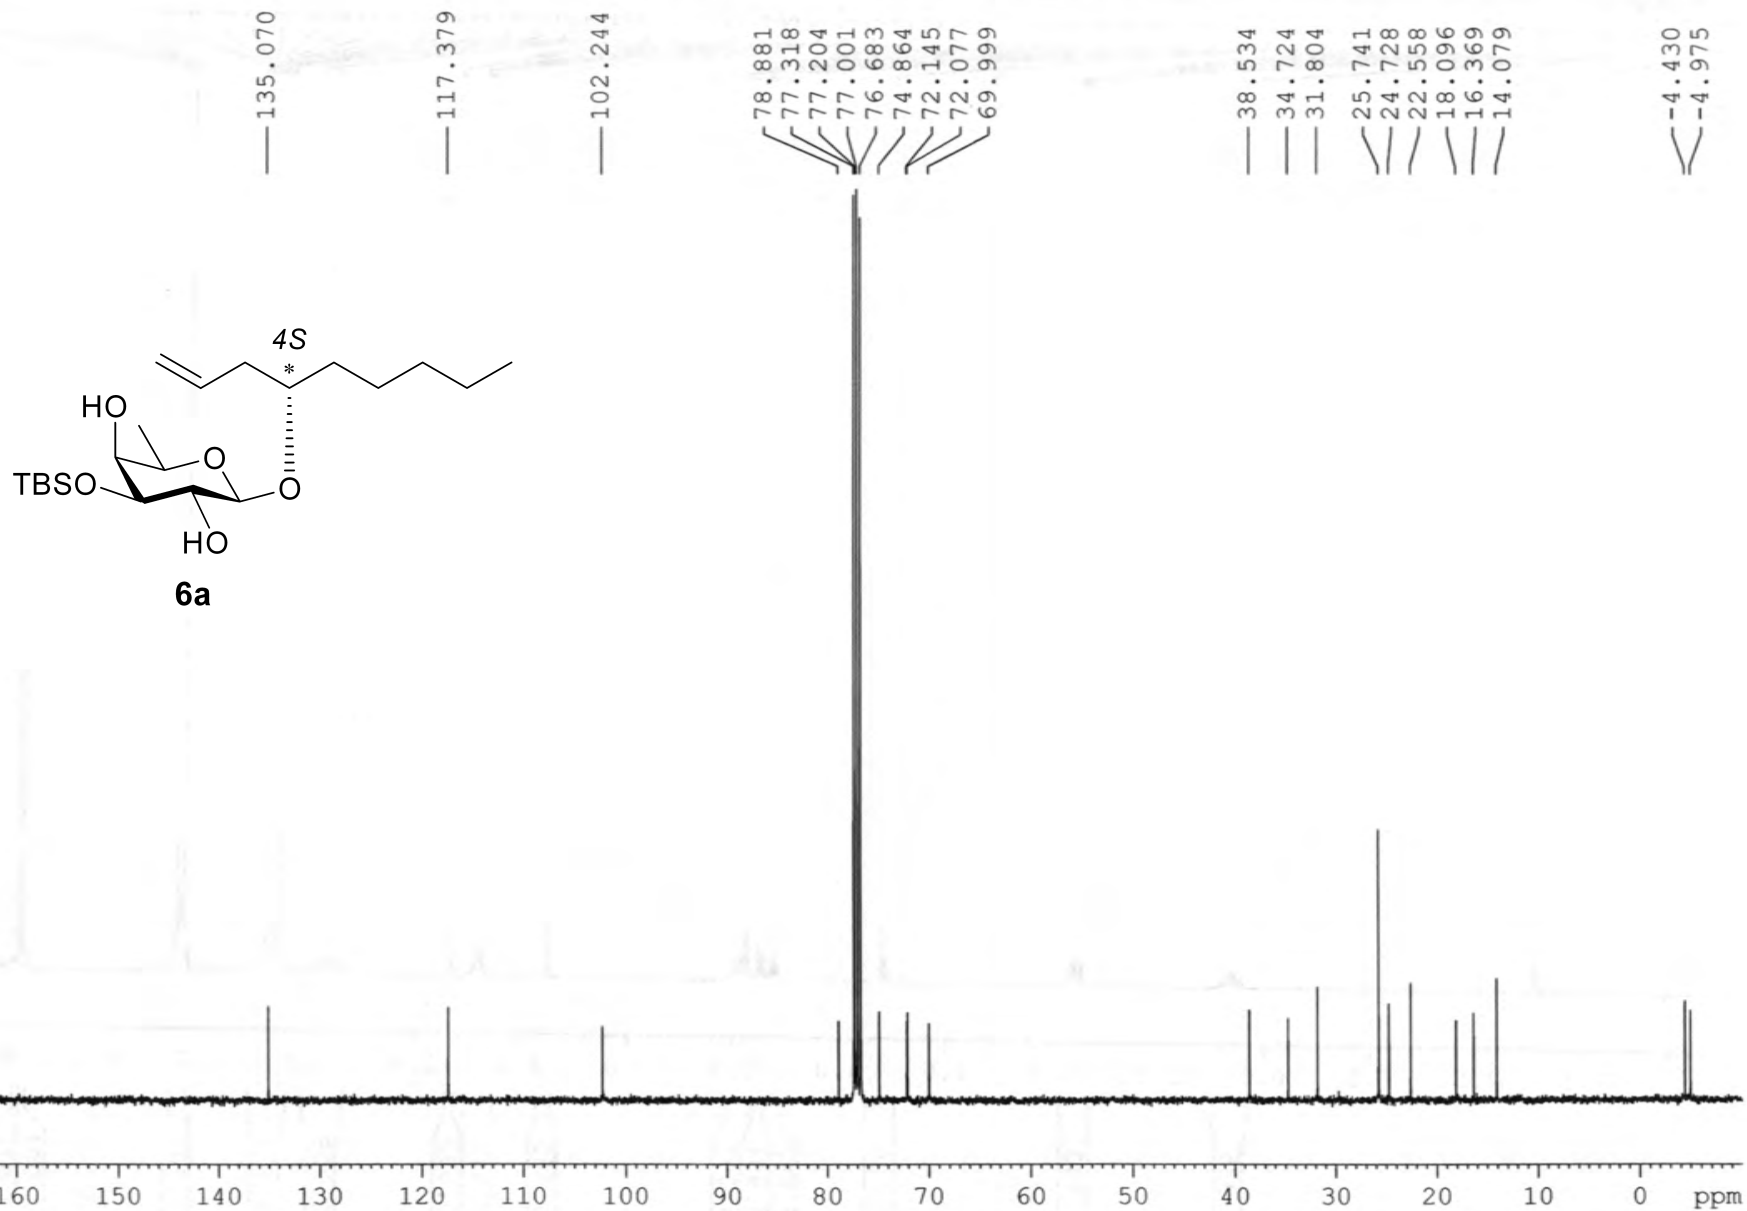

ZGH-*Ipom*-2-22-A 1H in CDCl<sub>3</sub>

— 7.270

5.813  
5.787  
5.770  
5.745  
5.076  
5.066  
5.049  
5.045  
5.041  
5.033  
5.029  
5.021  
4.370  
4.349  
3.789  
3.780  
3.765  
3.756  
3.674  
3.672  
3.658  
3.656  
3.603  
3.588  
3.573  
2.244  
2.229  
2.227  
2.212  
2.146  
2.050  
1.623  
1.589  
1.586  
1.574  
1.566  
1.559  
1.551  
1.536  
1.509  
1.488  
1.472  
1.457  
1.453  
1.354  
1.335  
1.318  
1.303  
1.292  
1.288  
1.282  
1.275  
1.263  
1.232  
1.186  
1.170  
0.893  
0.877  
0.859  
0.823  
0.061  
0.044

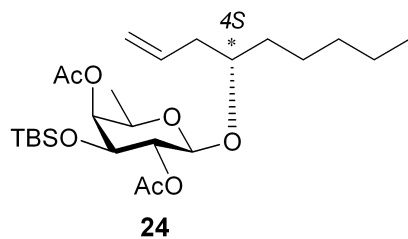

7.0 6.5 6.0 5.5 5.0 4.5 4.0 3.5 3.0 2.5 2.0 1.5 1.0 0.5 0.0 -0.5 ppm

0.976

4.009

1.000

1.026

0.974

1.036

1.990

3.000

3.060

2.122

6.246

3.118

3.221

9.101

2.855

2.999



ZGH-*Ipom*-2-22-A 13C in CDCl<sub>3</sub>170.874  
169.176

134.676

116.852

100.608

79.890  
77.321  
77.206  
77.004  
76.687  
72.919  
72.278  
71.484  
69.02238.386  
34.371  
31.751  
25.373  
24.638  
22.559  
21.220  
20.869  
17.749  
16.312  
14.043-4.838  
-5.162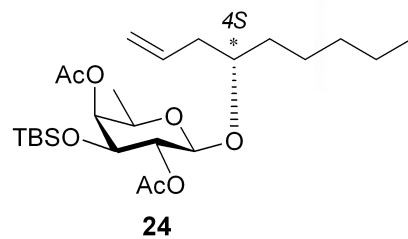

170 160 150 140 130 120 110 100 90 80 70 60 50 40 30 20 10 0 ppm

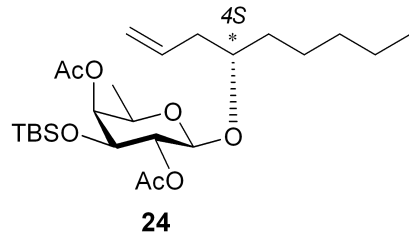

## ZGH-Ipom-2-22-A COSY

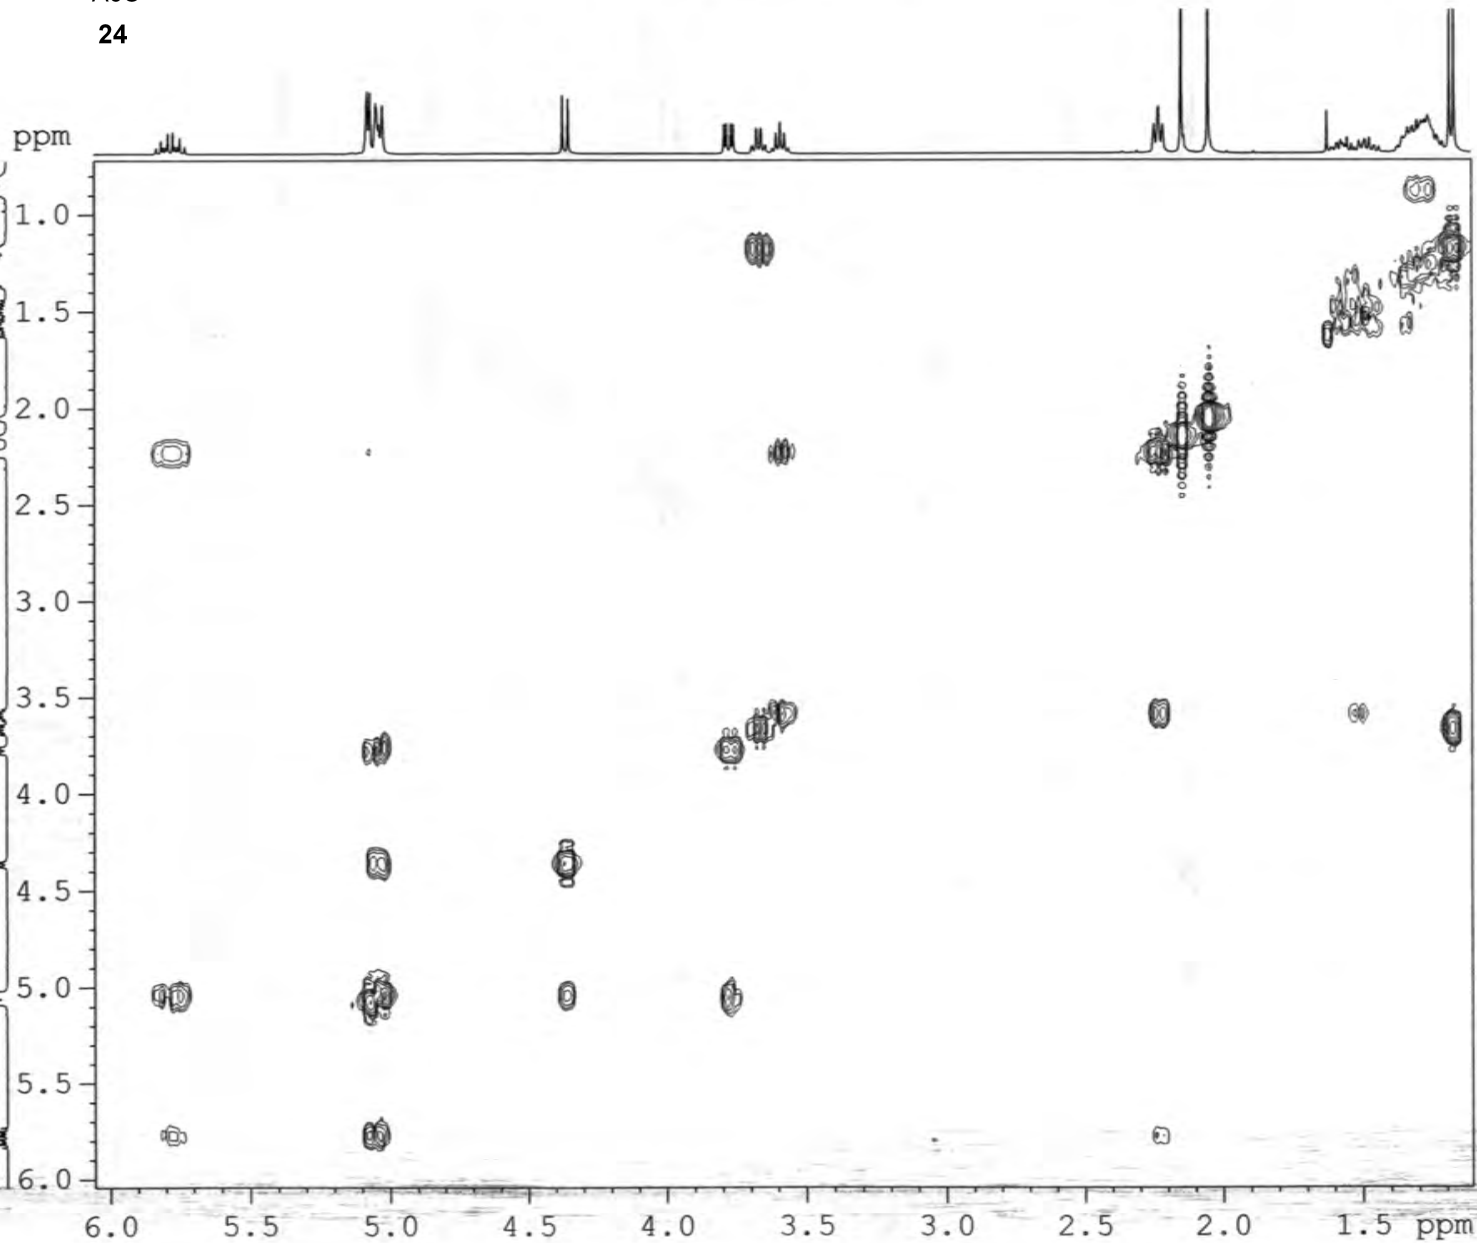

NAME ZGH-Ipom-2-22-A  
 EXPNO 2  
 PROCNO 1  
 Date 20150323  
 Time 12.35  
 INSTRUM spect  
 PROBHD 5 mm PABBO BB-  
 PULPROG cosygpgf  
 TD 2048  
 SOLVENT CDC13  
 NS 4  
 DS 8  
 SWH 5341.880 Hz  
 FIDRES 2.608340 Hz  
 AQ 0.1917428 sec  
 RG 114  
 DW 93.600 usec  
 DE 6.50 usec  
 TE 292.8 K  
 DO 0.00000300 sec  
 D1 1.48689198 sec  
 D13 0.00000400 sec  
 D16 0.00020000 sec  
 INO 0.00018720 sec

----- CHANNEL f1 -----  
 NUC1 1H  
 P0 10.00 usec  
 P1 10.00 usec  
 PL1 -3.50 dB  
 PL1W 31.17620277 W  
 SFO1 400.1324057 MHz

----- GRADIENT CHANNEL -----  
 GPNAM1 SINE.100  
 GPZ1 10.00 %  
 P16 1000.00 usec  
 NDO 1  
 TD 128  
 SFO1 400.1324 MHz  
 FIDRES 41.733440 Hz  
 SW 13.350 ppm  
 FrMODE QF  
 SI 1024  
 SF 400.1300040 MHz  
 WDW SINE  
 SSB 0  
 LB 0.00 Hz  
 GB 0  
 PC 1.00  
 SI 1024  
 MC2 QF  
 SF 400.1300033 MHz  
 WDW SINE  
 SSB 0  
 LB 0.00 Hz  
 GB 0

EDB-Ipom-1-103-A-150518 in CDCL<sub>3</sub>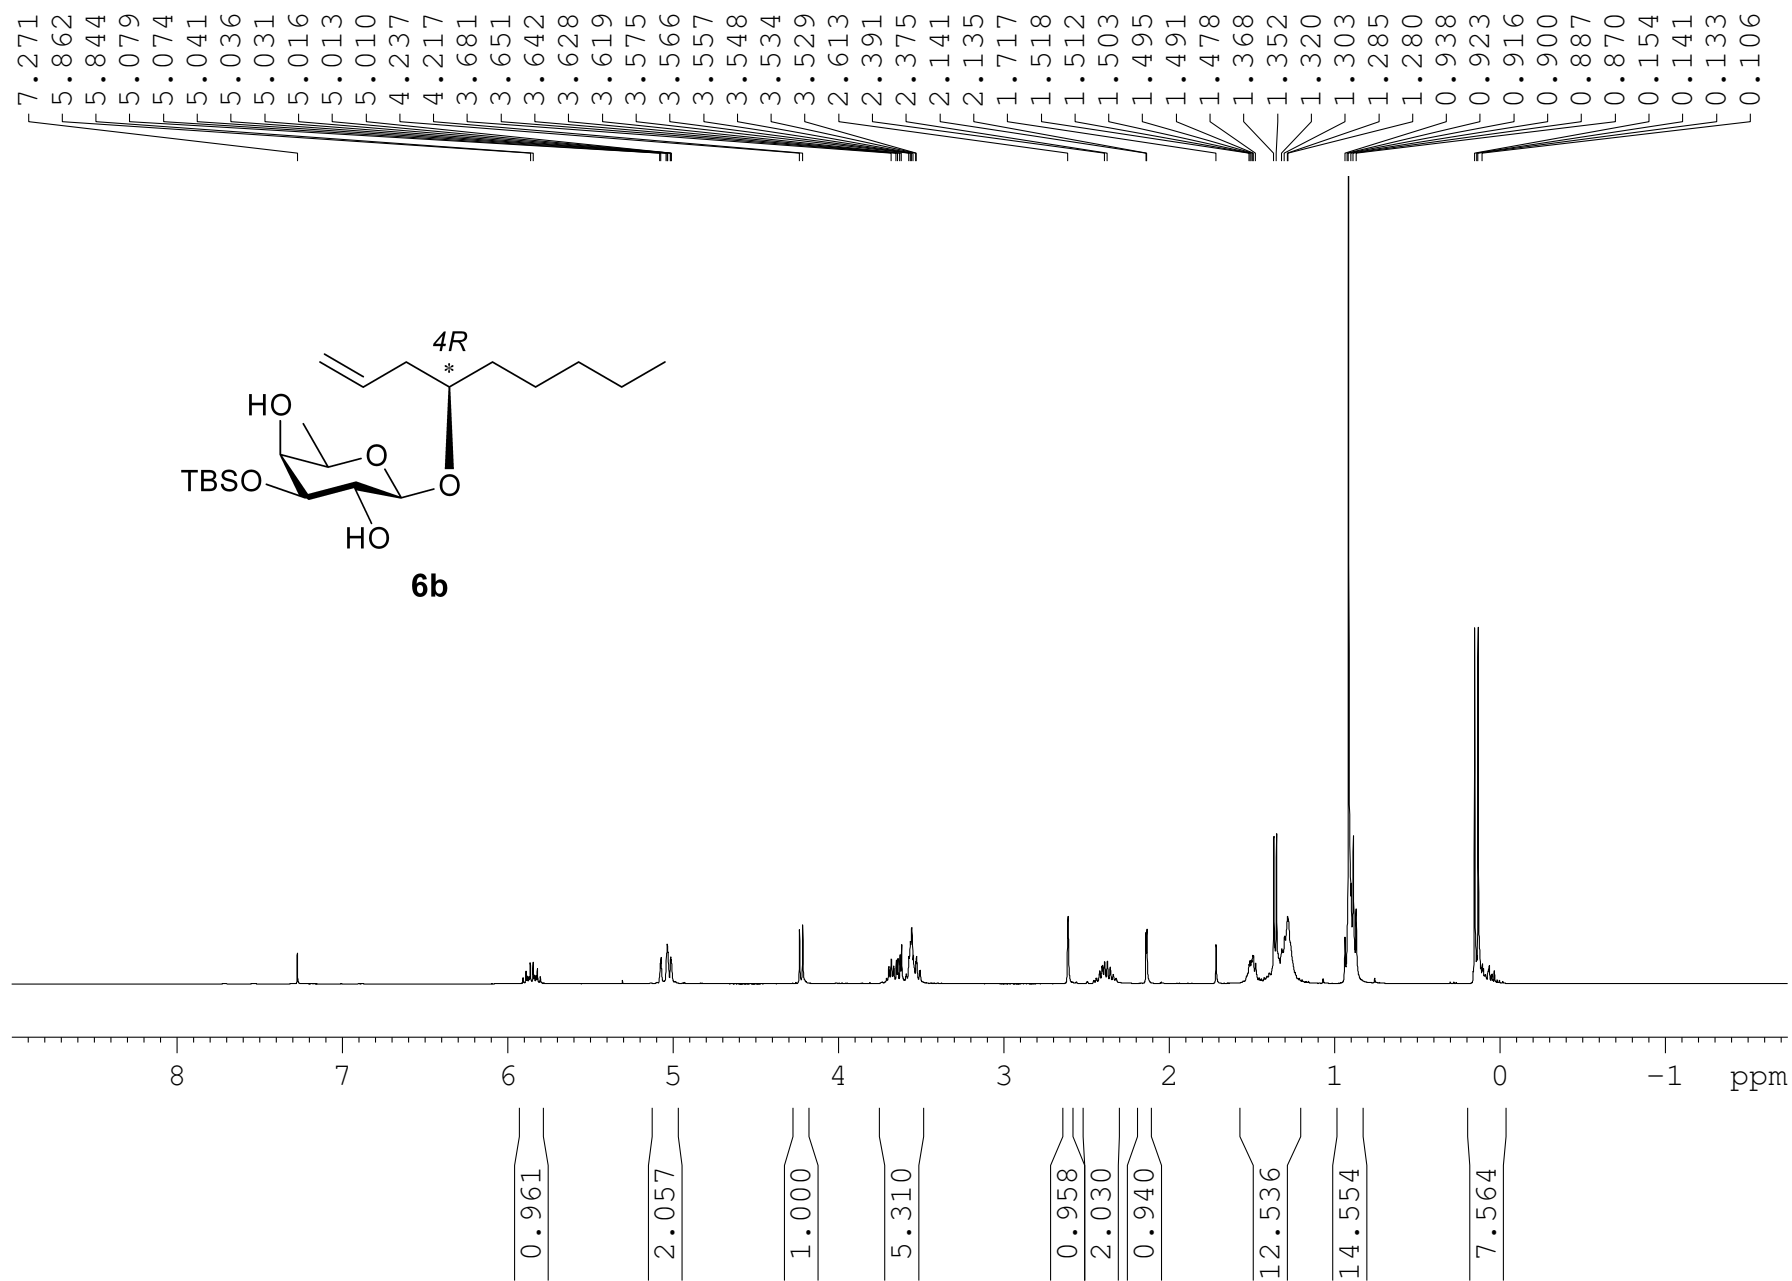

EDB-Ipom-1-103-A-150518 <sup>13</sup>C in CDCl<sub>3</sub>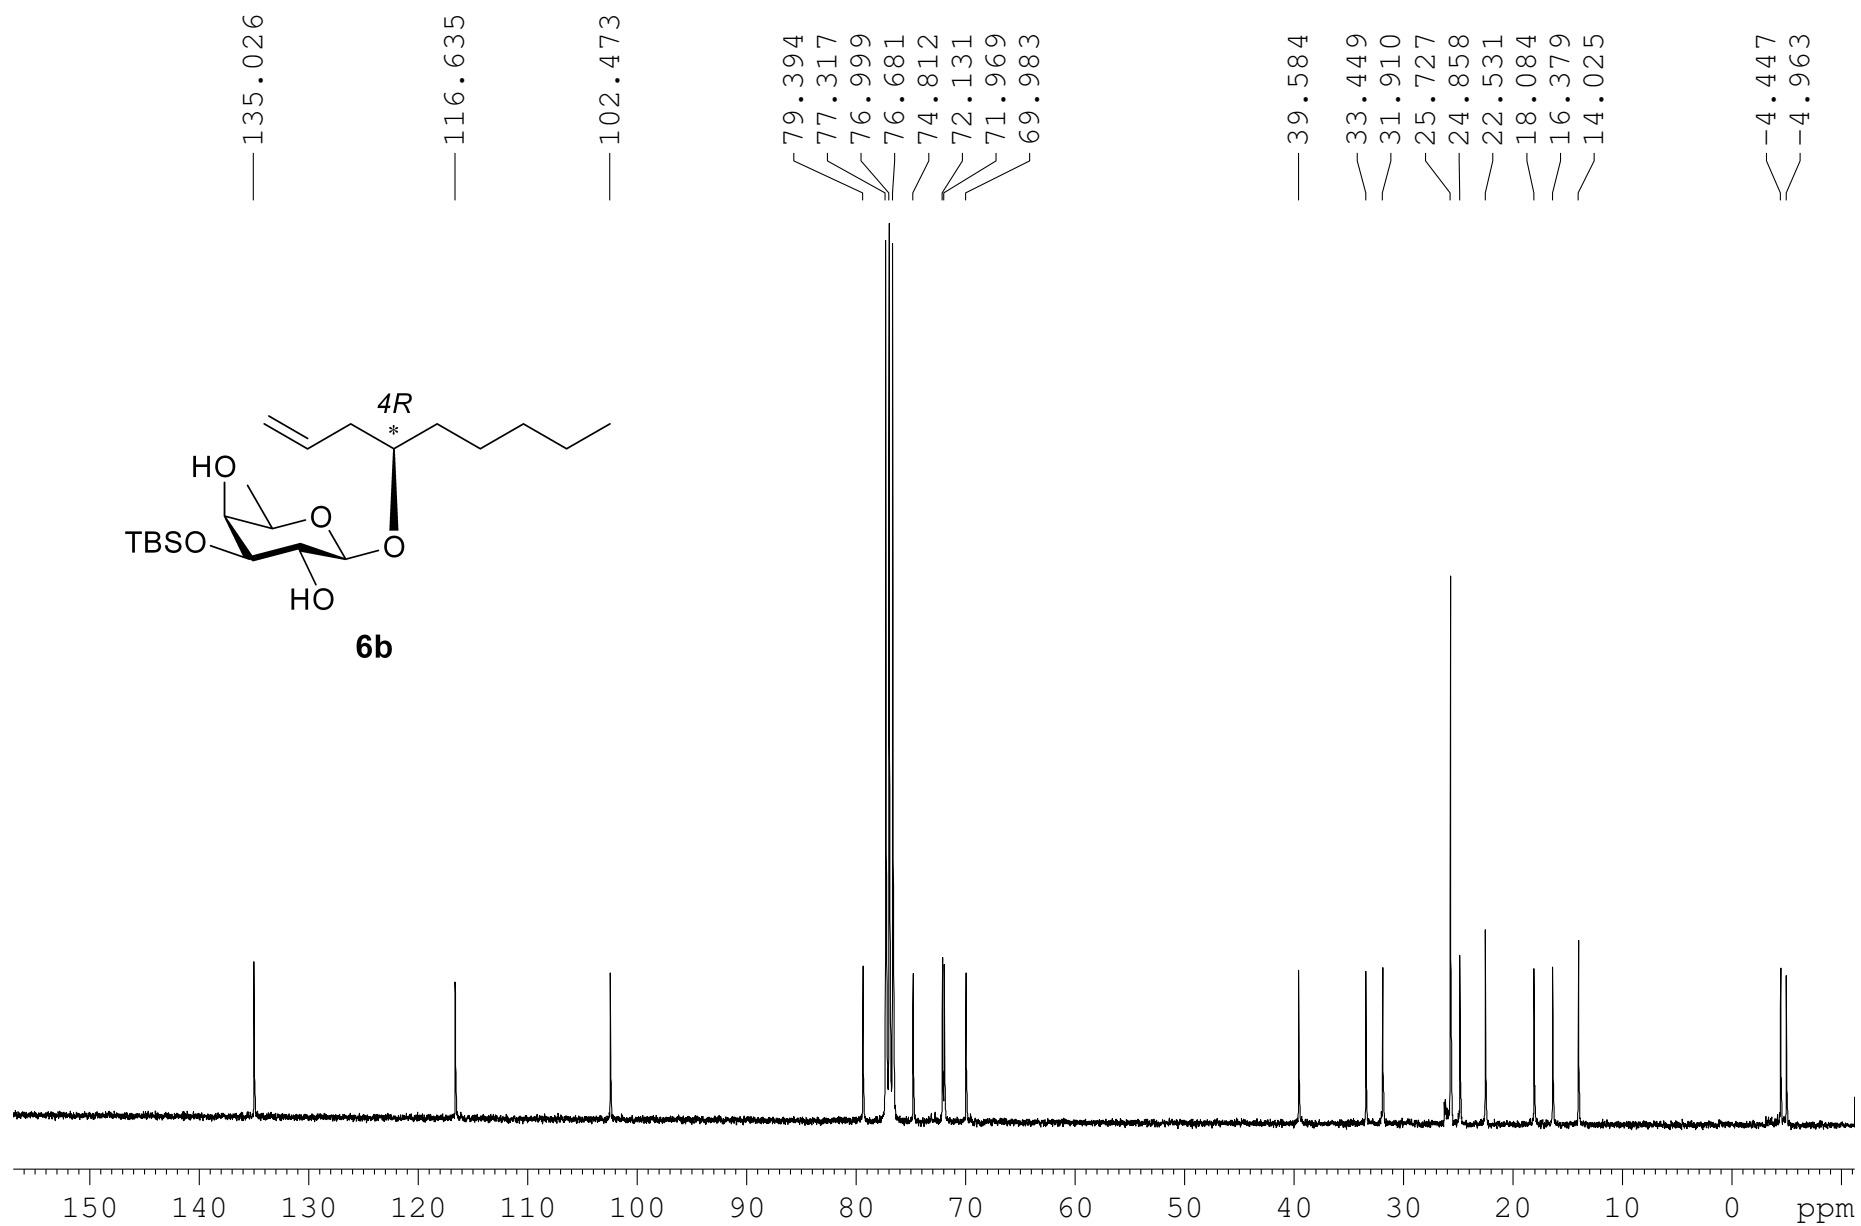

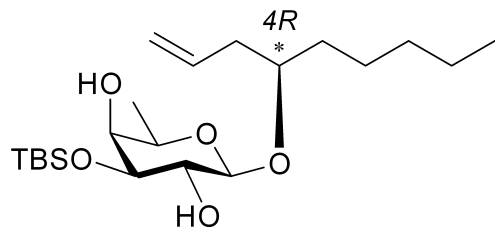

6b

EDB-Ipom-1-103-A-150518 COSY

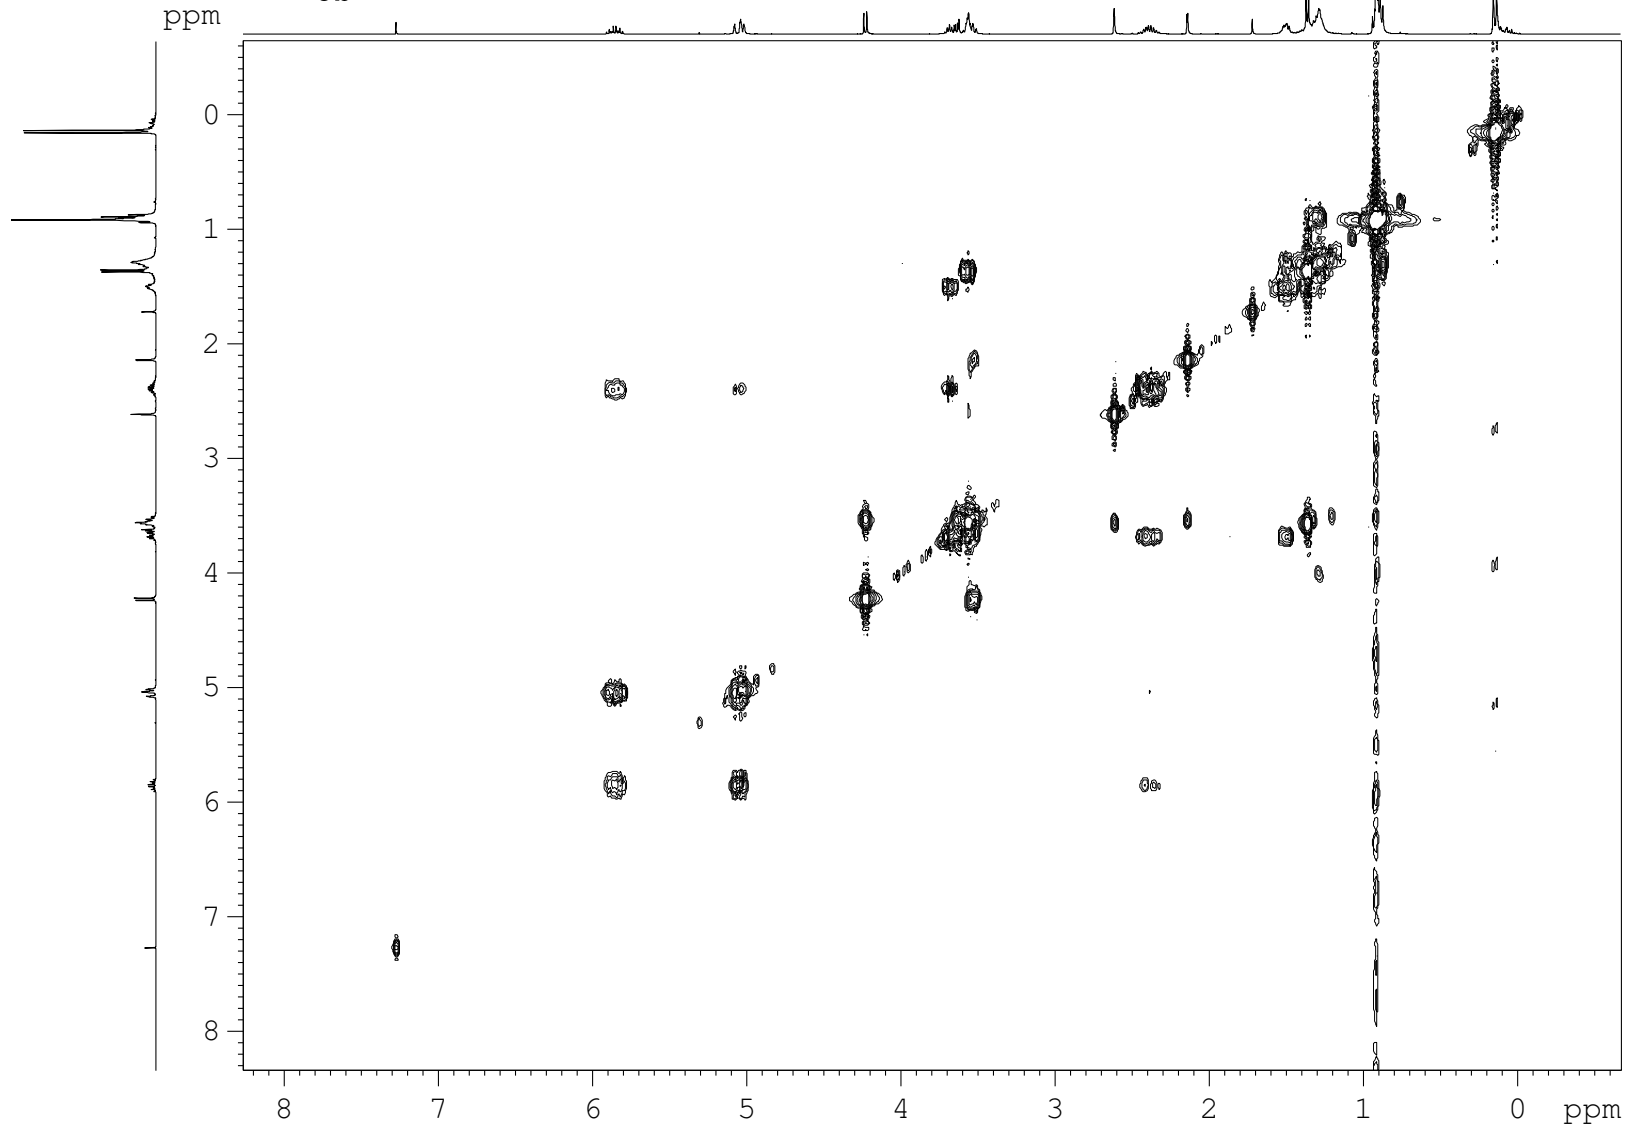

```

NAME      EDB-Ipom-1-103-A-150518
EXPNO     2
PROCNO    1
Date_     20150615
Time      21.24
INSTRUM   spect
PROBHD    5 mm PABBO BB-
PULPROG   cosygpgf
TD         2048
SOLVENT   CDCl3
NS         4
DS         8
SWH        5341.880 Hz
FIDRES     2.608340 Hz
AQ         0.1917428 sec
RG         80.6
DW         93.600 usec
DE         6.50 usec
TE         292.4 K
D0         0.00000300 sec
D1         1.48689198 sec
D13        0.00000400 sec
D16        0.00020000 sec
IN0        0.00018720 sec

```

```

===== CHANNEL f1 =====
NUC1      1H
P0         10.00 usec
P1         10.00 usec
PL1        -3.50 dB
PL1W       31.17620277 W
SFO1      400.1324057 MHz

```

```

===== GRADIENT CHANNEL =====
GPNAM1    SINE.100
GPZ1      10.00 %
P16       1000.00 usec
ND0        1
TD         128
SFO1      400.1324 MHz
FIDRES     41.733440 Hz
SW         13.350 ppm
FnMODE     QF
SI         1024
SF         400.1300040 MHz
WDW        SINE
SSB        0
LB         0.00 Hz
GB         0
PC         1.00
SI         1024
MC2        QF
SF         400.1300033 MHz
WDW        SINE
SSB        0
LB         0.00 Hz
GB         0

```

ZGH-Ipom-2-25-A 1H in CDCL3

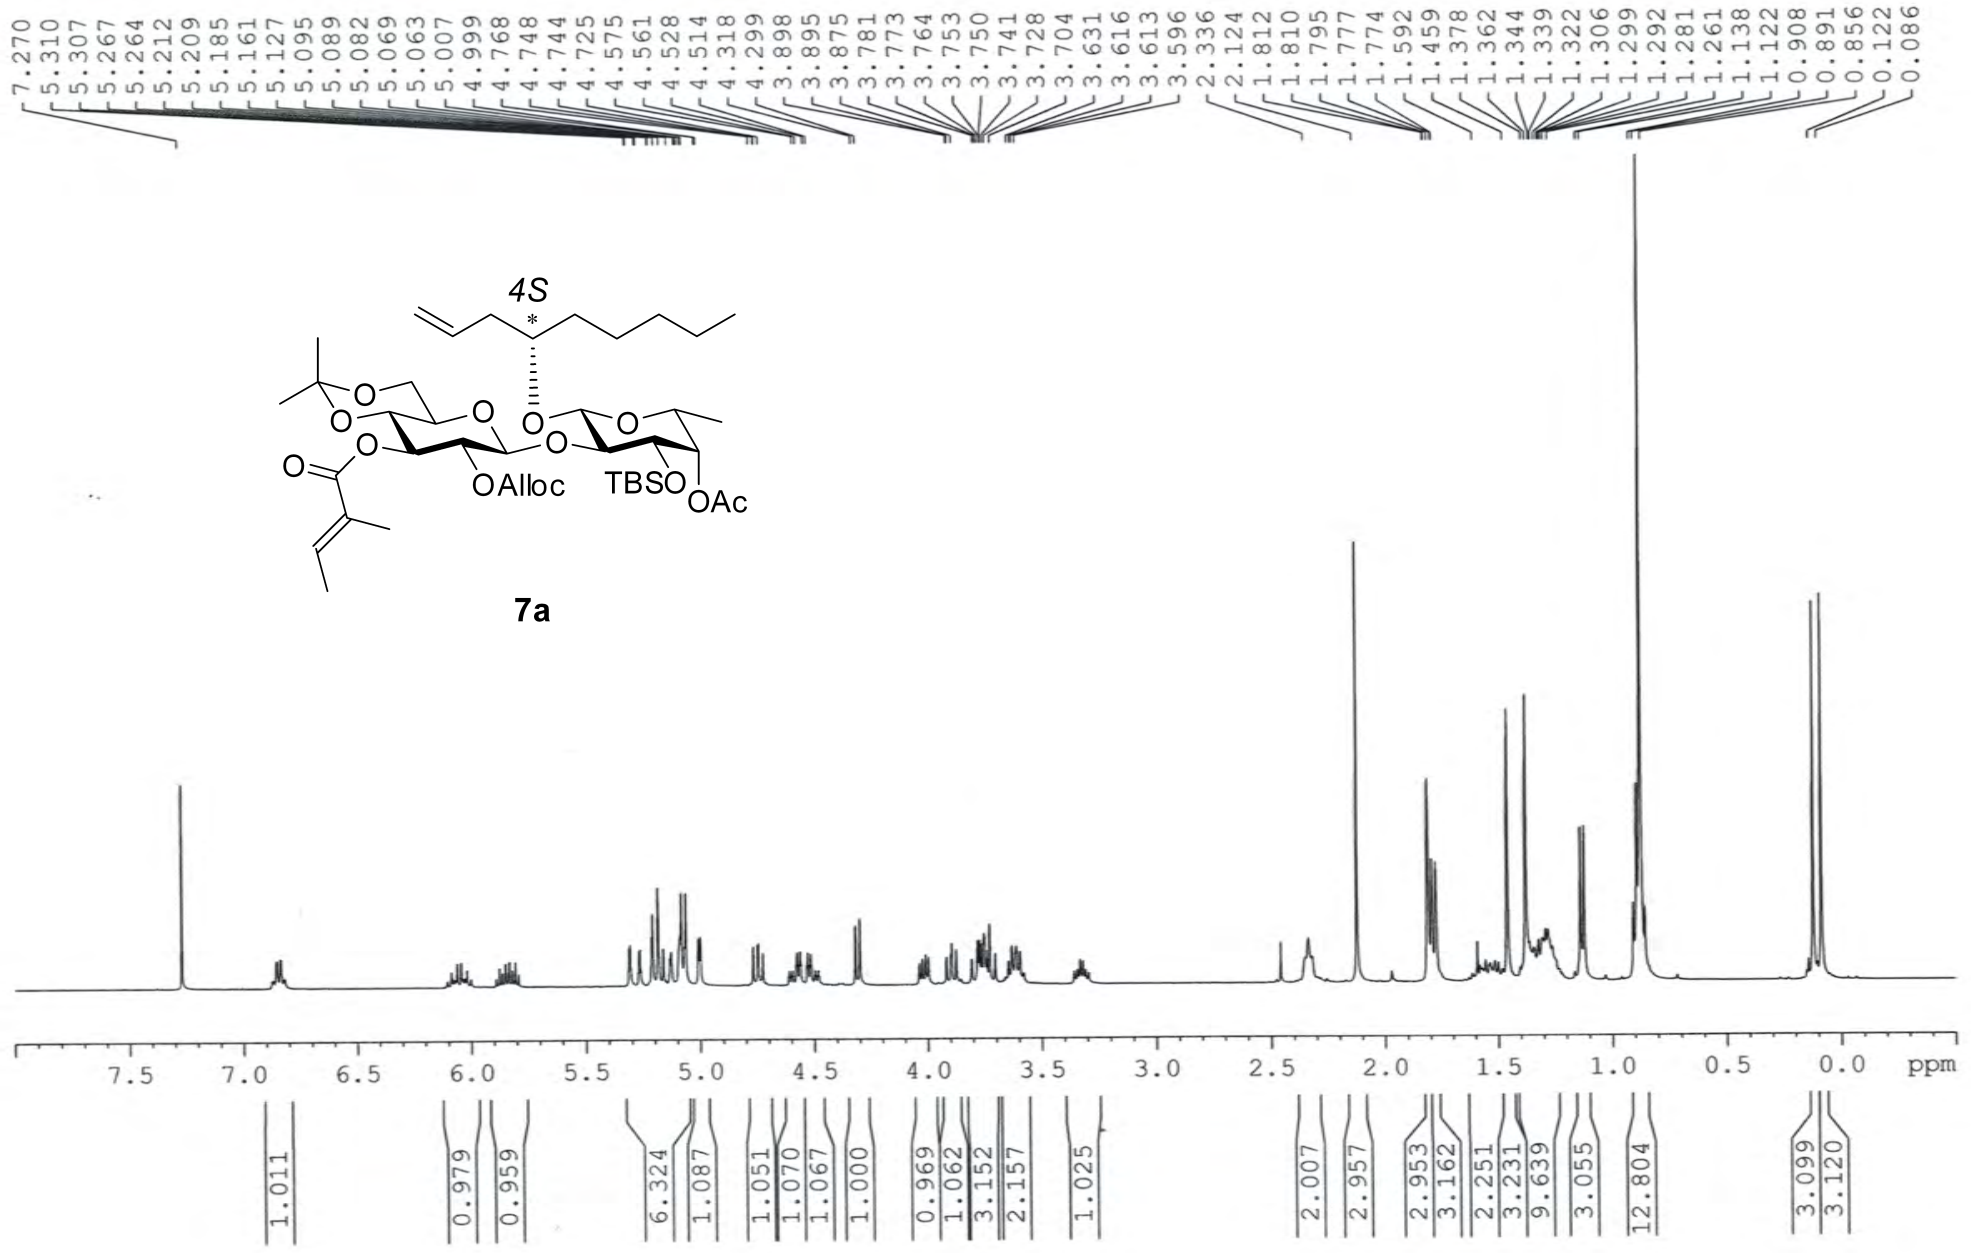

ZGH-*Ipom*-2-25-A <sup>13</sup>C in CDCl<sub>3</sub>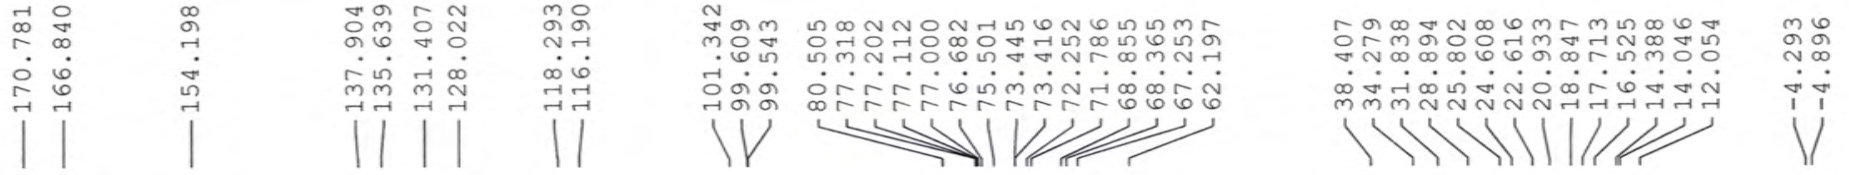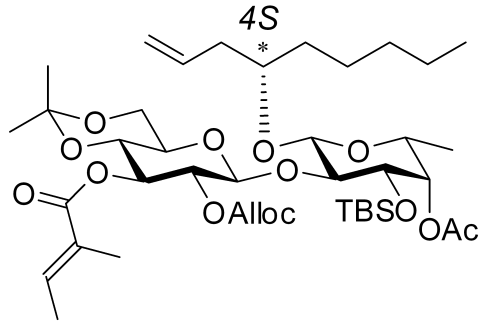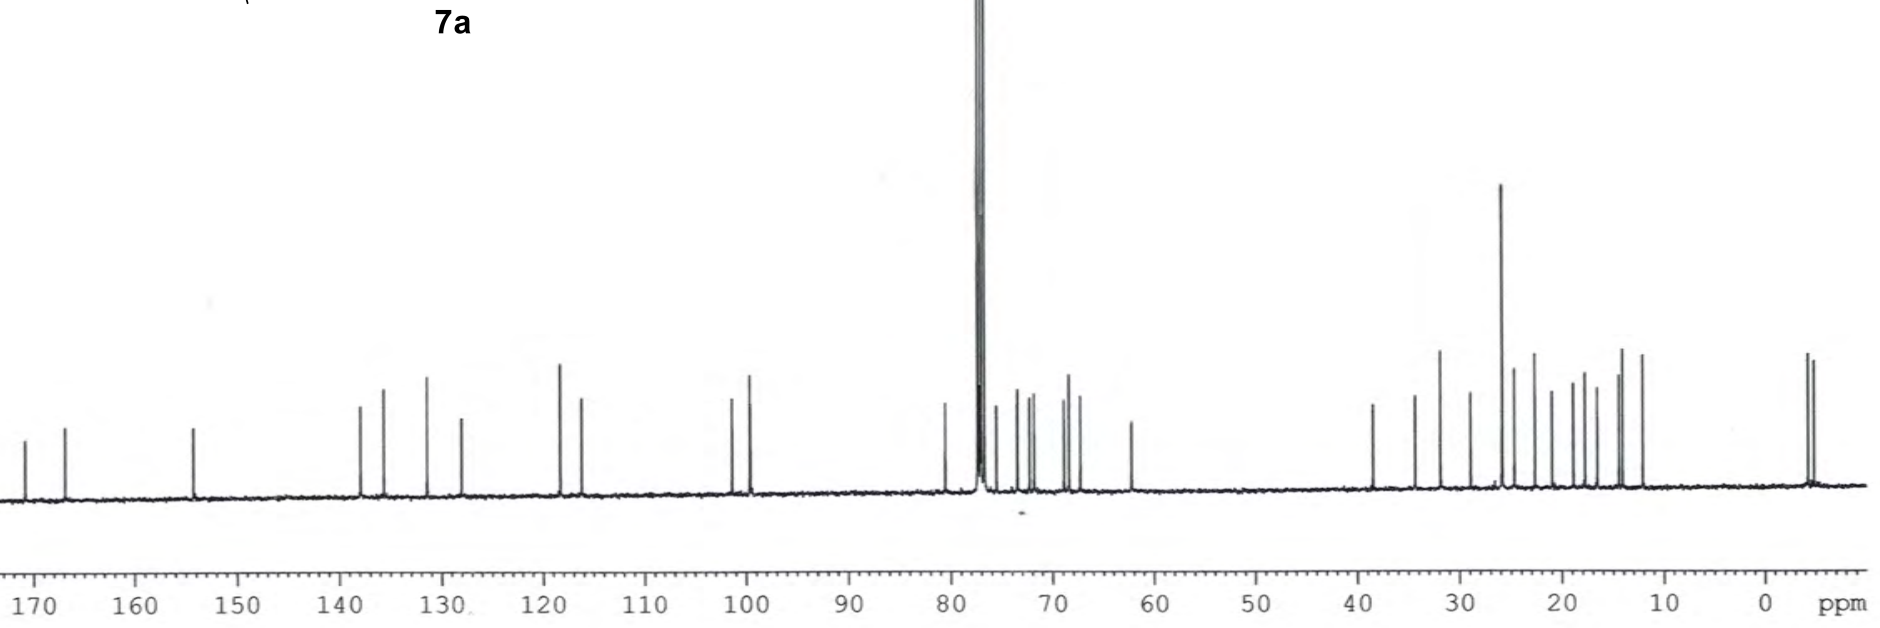

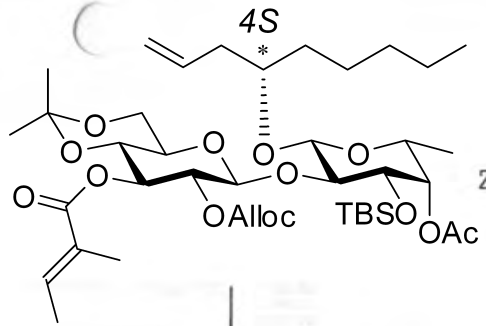

ZGH-Ipom-2-25-A-150106 COSY

7a

ppm

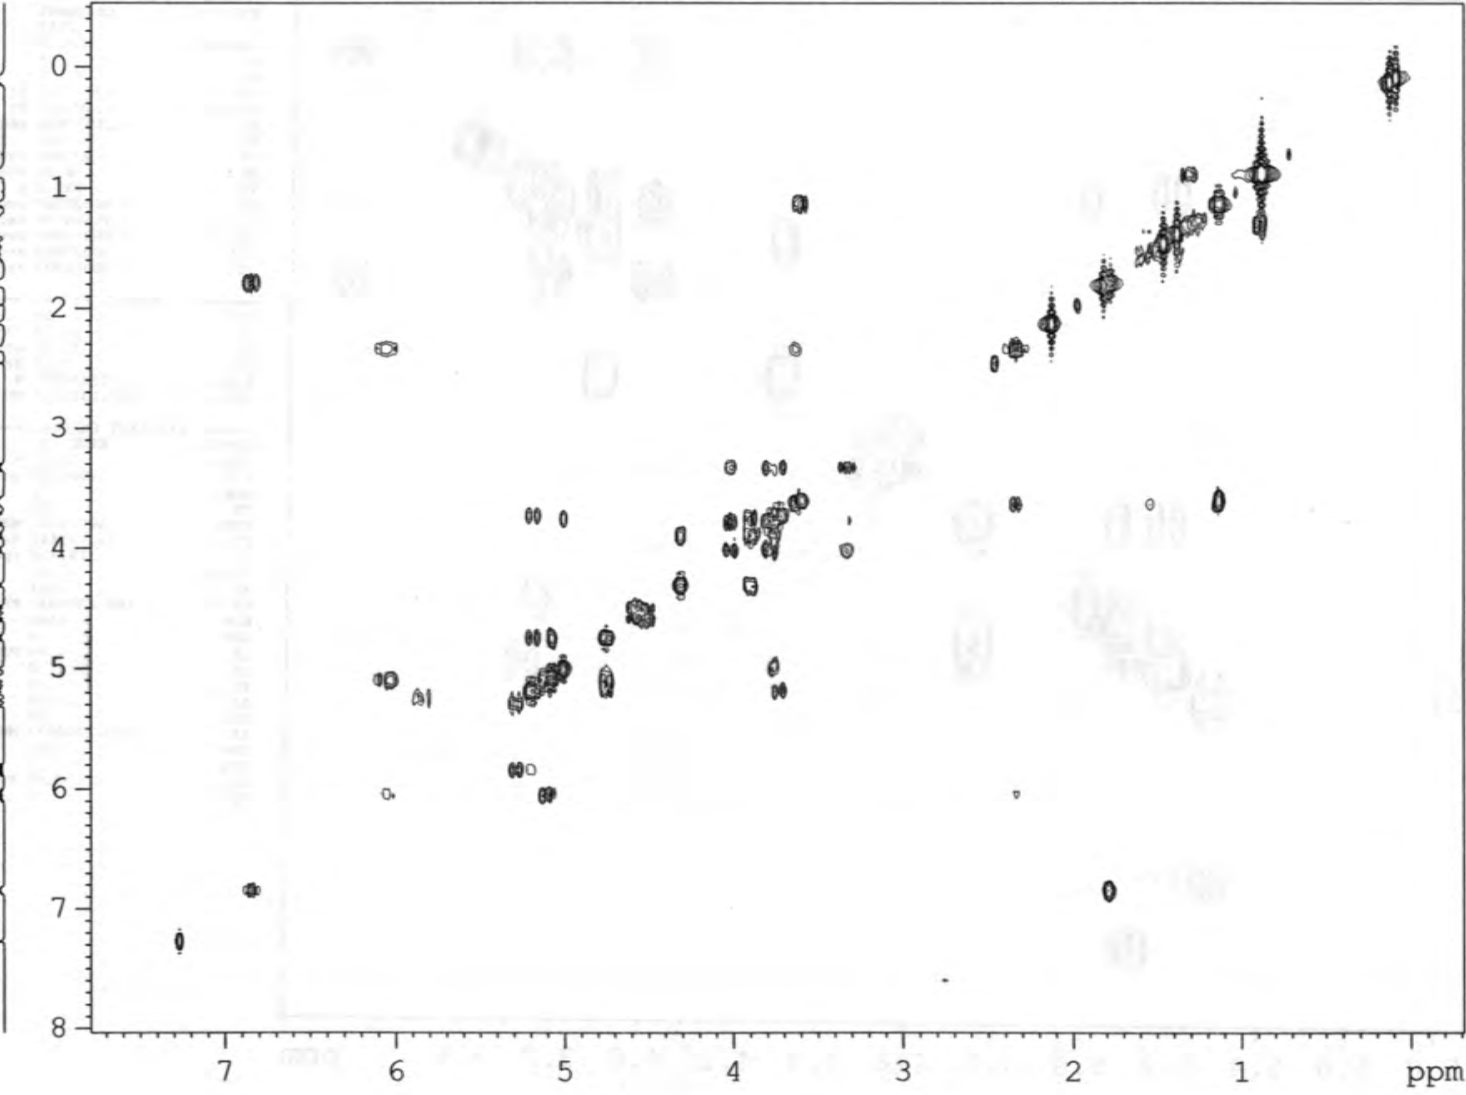

NAME ZGH-Ipom-2-25-A-150106  
 EXPNO 2  
 PROCNO 1  
 Date 20150107  
 Time 21.12  
 INSTRUM spect  
 PROBHD 5 mm PABBO BB-  
 PULPROG cosyppqf  
 TD 2048  
 SOLVENT CDCl3  
 NS 4  
 DS 8  
 SWH 5341.880 Hz  
 FIDRES 2.608340 Hz  
 AQ 0.1917428 sec  
 RG 161  
 DW 93.600 usec  
 DE 6.50 usec  
 TE 292.2 K  
 D0 0.00000300 sec  
 D1 1.48689198 sec  
 D13 0.00000400 sec  
 D16 0.00020000 sec  
 INO 0.00018720 sec

----- CHANNEL f1 -----  
 NUC1 1H  
 P0 10.00 usec  
 P1 10.00 usec  
 PL1 -3.50 dB  
 PL1W 31.17620277 W  
 SFO1 400.1324057 MHz

----- GRADIENT CHANNEL -----  
 GPNAM1 SINE.100  
 GPZ1 10.00 %  
 P16 1000.00 usec  
 NDO 1  
 TD 128  
 SFO1 400.1324 MHz  
 FIDRES 41.733440 Hz  
 SW 13.350 ppm  
 FMODE QF  
 SI 1024  
 SF 400.1300040 MHz  
 WDW SINE  
 SSB 0  
 LB 0.00 Hz  
 GB 0  
 PC 1.00  
 SI 1024  
 MC2 QF  
 SF 400.1300033 MHz  
 WDW SINE  
 SSB 0  
 LB 0.00 Hz  
 GB 0



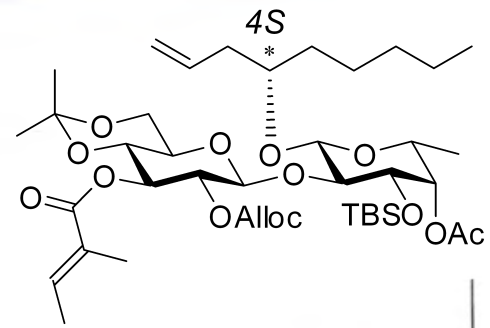ZGH-*Ipom*-2-25-A HSQC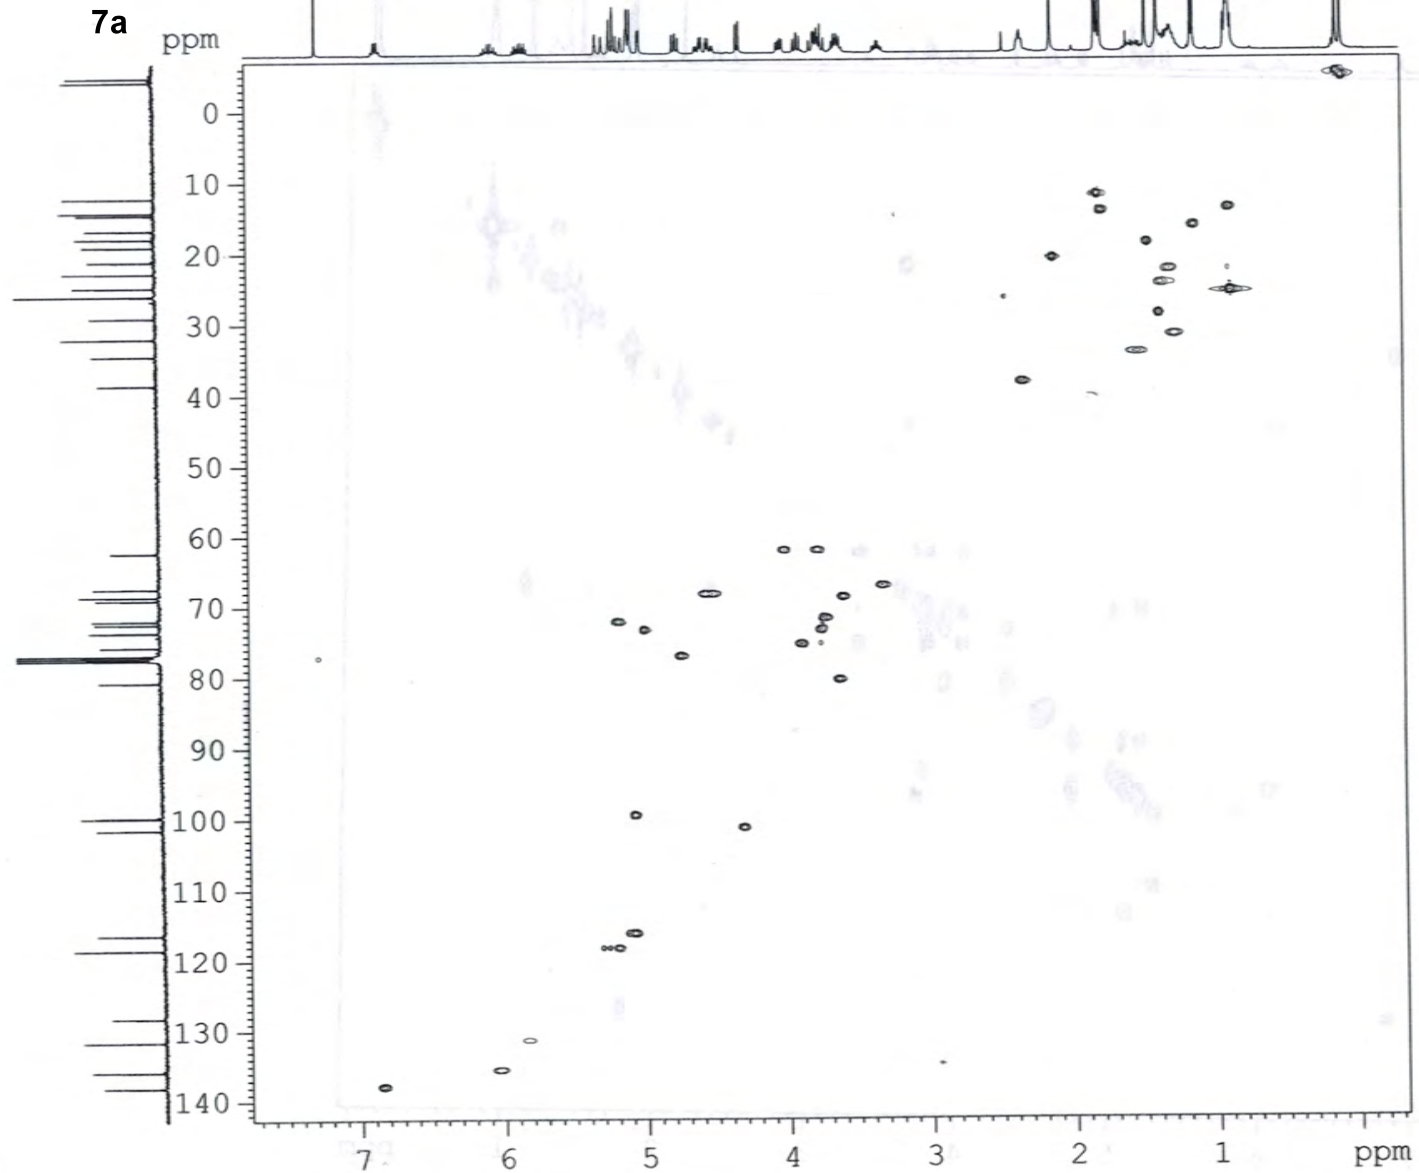

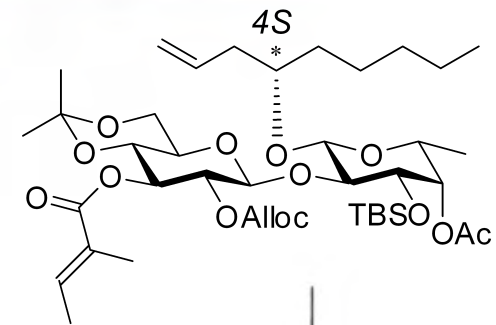ZGH-*Ipom*-2-25-A-150106 HMBC in CDCl<sub>3</sub>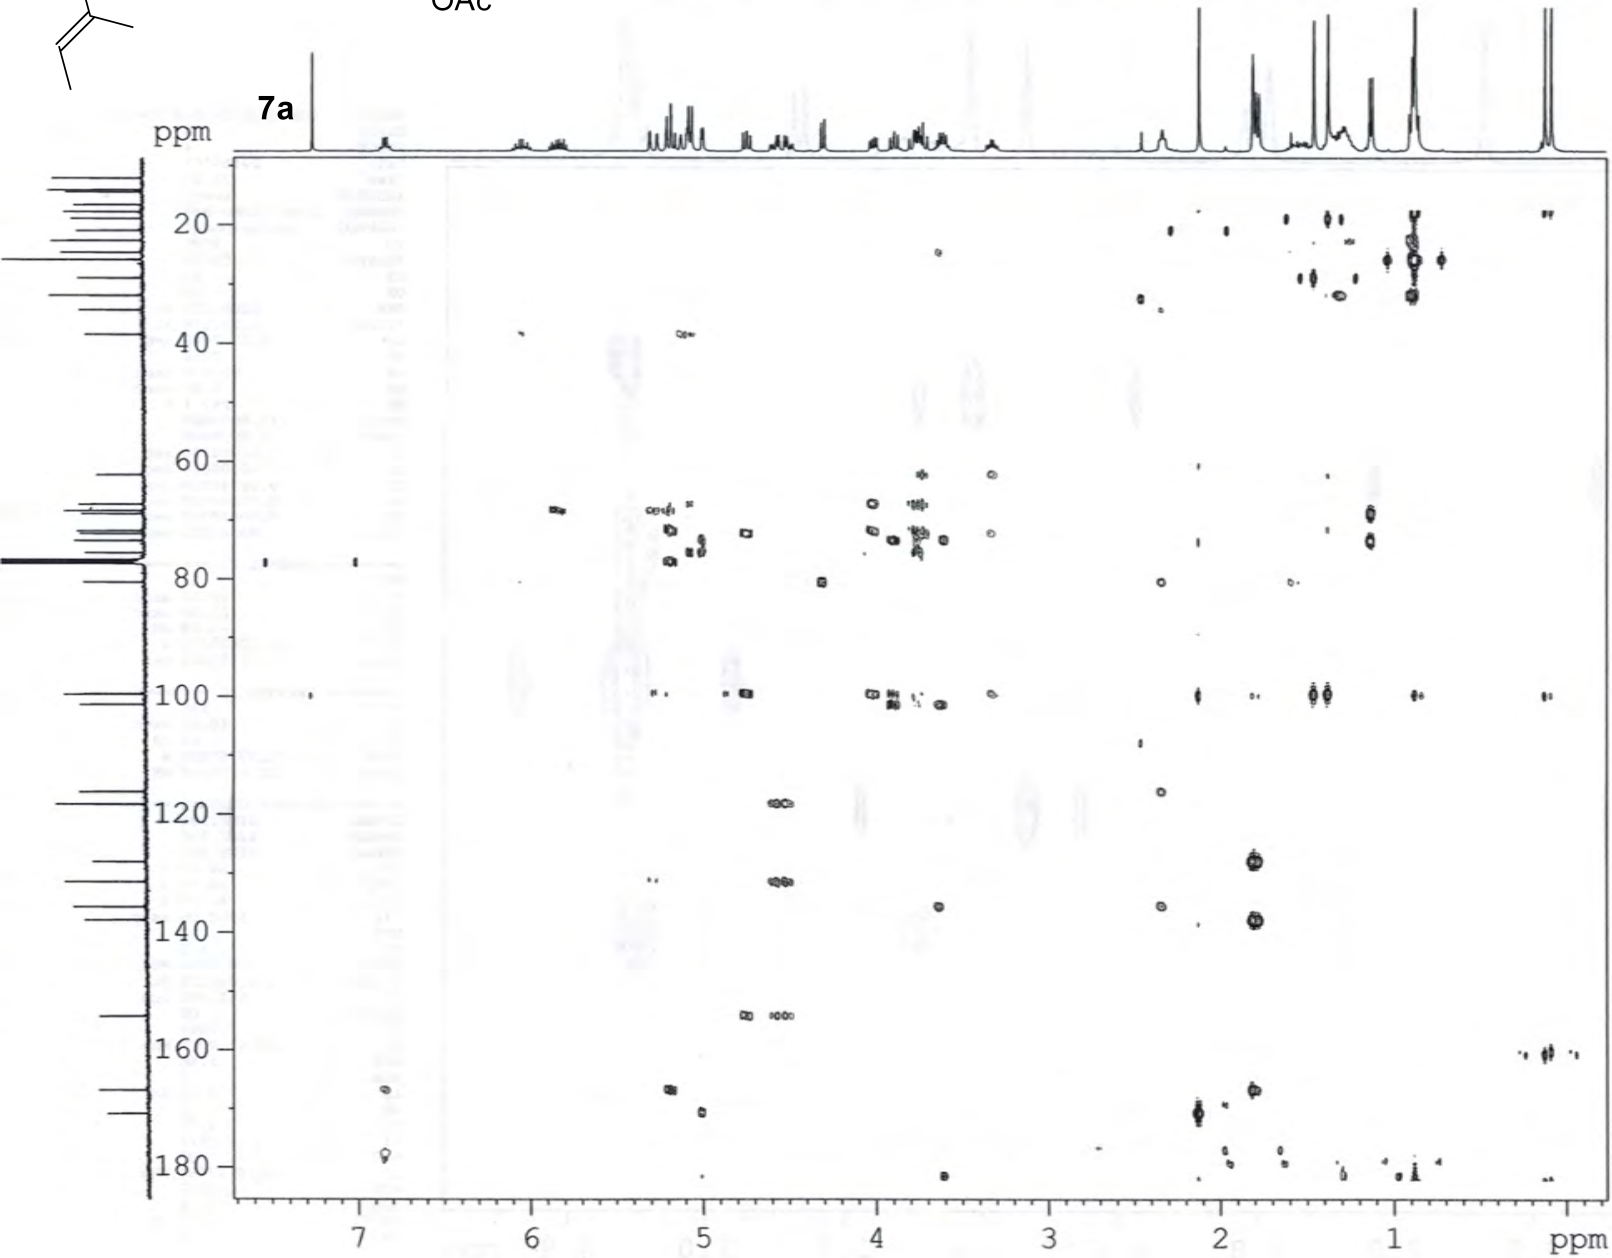

NAME ZGH-*Ipom*-2-25-A-150106  
 EXPNO 5  
 PROCNO 1  
 Date\_ 20150107  
 Time 23.35  
 INSTRUM spect  
 PROBHD 5 mm PABBO BB-  
 PULPROG hmbcgp1pndqf  
 TD 4096  
 SOLVENT CDCl3  
 NS 15  
 DS 16  
 SWH 5208.333 Hz  
 FIDRES 1.271566 Hz  
 AQ 0.3932660 sec  
 RG 2050  
 DW 96.000 usec  
 DE 6.50 usec  
 TE 292.1 K  
 CNST2 145.0000000  
 CNST13 10.0000000  
 D0 0.00000300 sec  
 D1 1.50000000 sec  
 D2 0.00344828 sec  
 D6 0.05000000 sec  
 D16 0.00020000 sec  
 IN0 0.00003010 sec

===== CHANNEL f1 =====  
 NUC1 1H  
 P1 10.00 usec  
 P2 20.00 usec  
 PL1 -3.50 dB  
 PL1W 31.17620277 W  
 SFO1 400.1325208 MHz

===== CHANNEL f2 =====  
 NUC2 13C  
 P3 10.00 usec  
 PL2 -2.10 dB  
 PL2W 58.37759399 W  
 SFO2 100.6228138 MHz

===== GRADIENT CHANNEL =====  
 GPNAM1 SINE.100  
 GPNAM2 SINE.100  
 GPNAM3 SINE.100  
 GPZ1 50.00 %  
 GPZ2 30.00 %  
 GPZ3 40.10 %  
 P16 1000.00 usec  
 ND0 2  
 TD 122  
 SFO1 100.6228 MHz  
 FIDRES 136.088226 Hz  
 SW 165.000 ppm  
 FhMODE QF  
 SI 2048  
 SF 400.1300000 MHz  
 WDW SINE  
 SSB 0  
 LB 0.00 Hz  
 GB 0  
 PC 4.00  
 SI 1024  
 MC2 QF  
 SF 100.6127690 MHz  
 WDW SINE  
 SSB 0  
 LB 0.00 Hz  
 GB 0

EDB-Ipom-1-112-A-150608 in CDCl<sub>3</sub>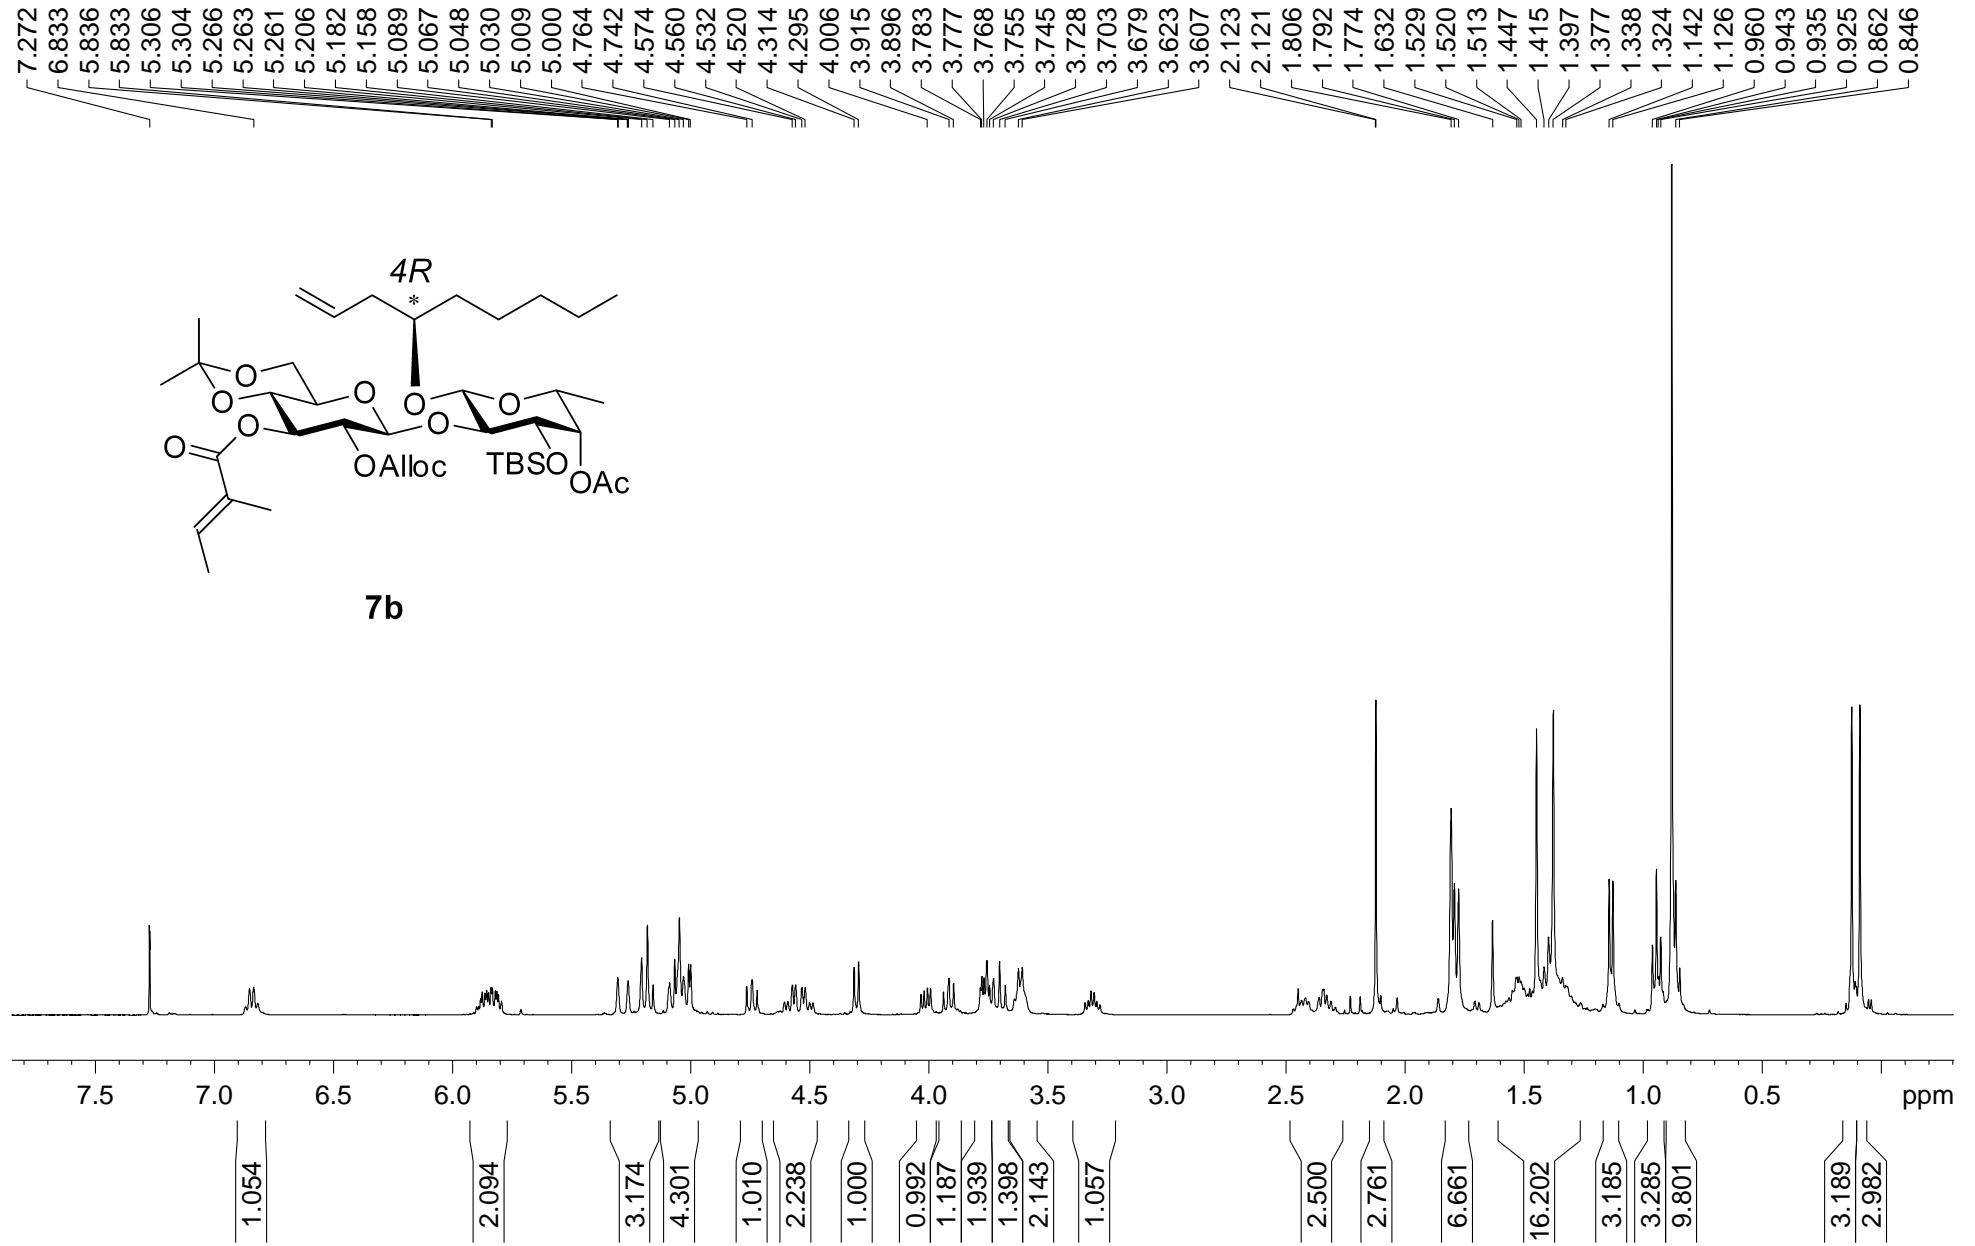

EDB-Ipom-1-112-A-150608 <sup>13</sup>C in CDCl<sub>3</sub>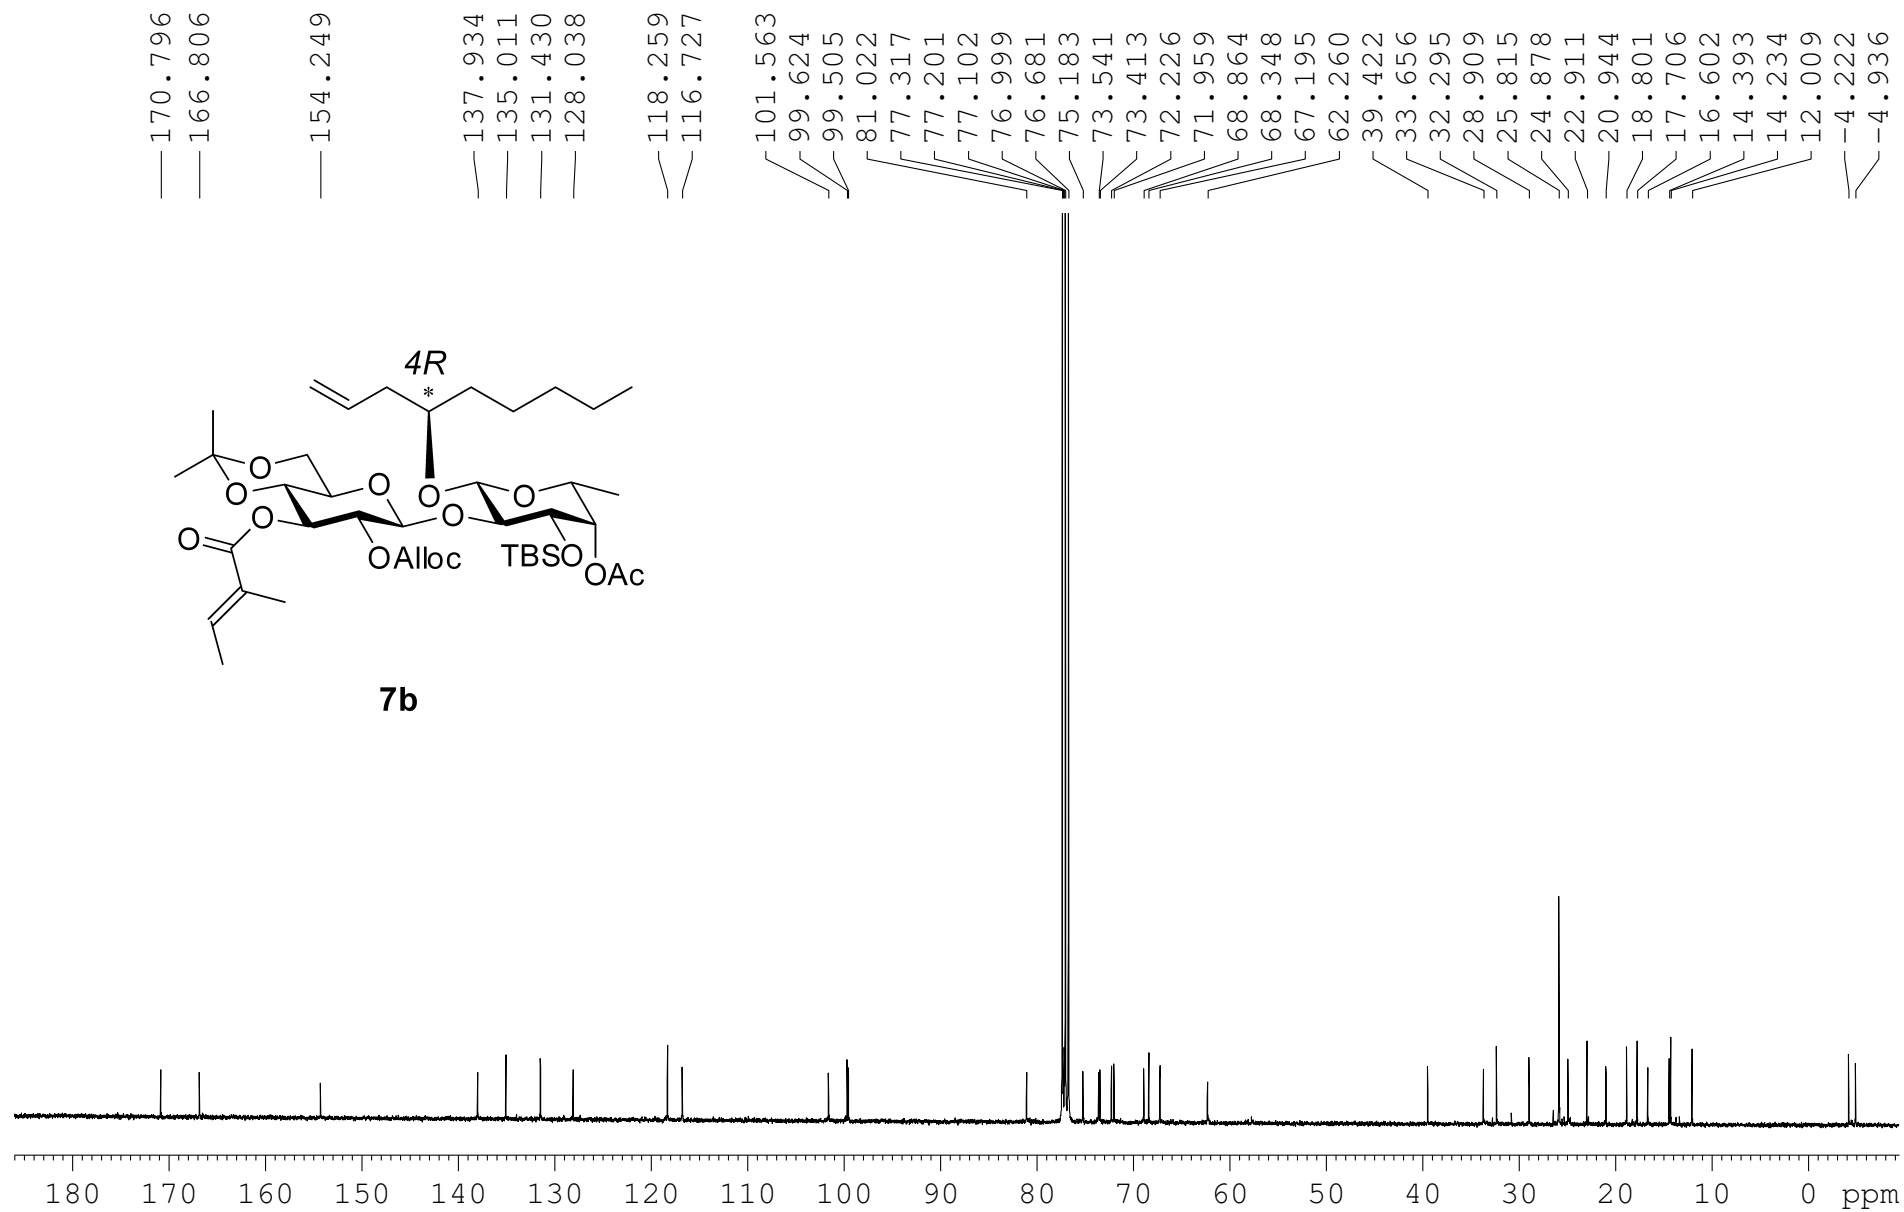

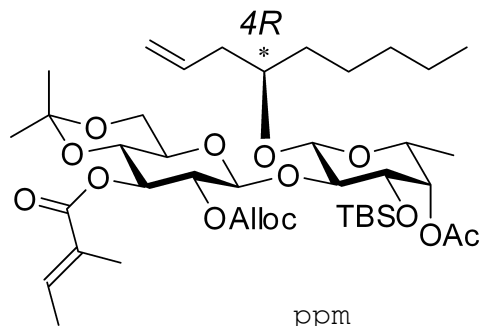

EDB-Ipom-1-112-A-150608 COSY

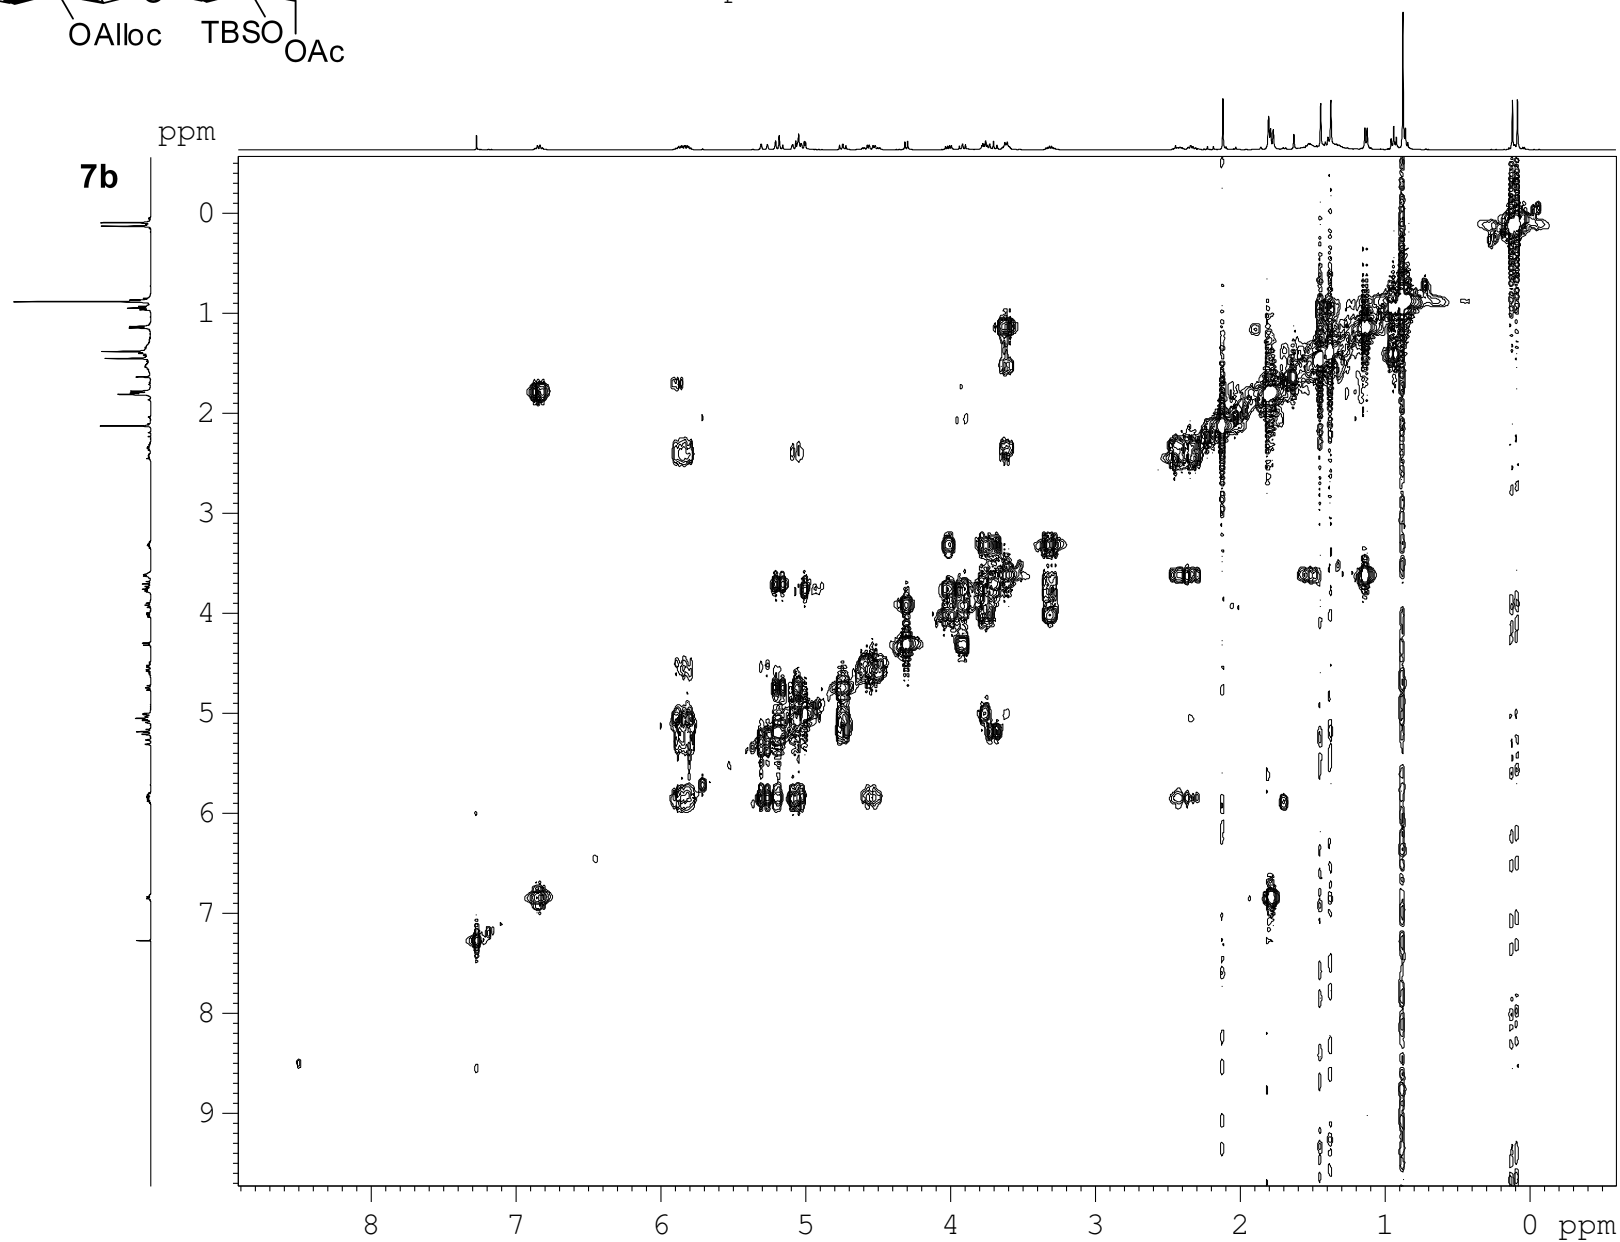

```

NAME      EDB-Ipom-1-112-A-150608
EXPNO     2
PROCNO    1
Date_     20150610
Time      22.15
INSTRUM   spect
PROBHD    5 mm PABBO BB-
PULPROG   cosygpgf
TD        2048
SOLVENT   CDCl3
NS        4
DS        8
SWH       5341.880 Hz
FIDRES    2.608340 Hz
AQ        0.1917428 sec
RG        114
DW        93.600 usec
DE        6.50 usec
TE        292.3 K
D0        0.00000300 sec
D1        1.48689198 sec
D13       0.00000400 sec
D16       0.00020000 sec
IN0       0.00018720 sec

```

```

===== CHANNEL f1 =====
NUC1      1H
P0        10.00 usec
P1        10.00 usec
PL1       -3.50 dB
PL1W      31.17620277 W
SFO1      400.1324057 MHz

```

```

===== GRADIENT CHANNEL =====
GPNAM1    SINE.100
GPZ1      10.00 %
P16       1000.00 usec
ND0       1
TD        128
SFO1      400.1324 MHz
FIDRES    41.733440 Hz
SW        13.350 ppm
FnMODE    QF
SI        1024
SF        400.1300040 MHz
WDW       SINE
SSB       0
LB        0.00 Hz
GB        0
PC        1.00
SI        1024
MC2       QF
SF        400.1300033 MHz
WDW       SINE
SSB       0
LB        0.00 Hz
GB        0

```

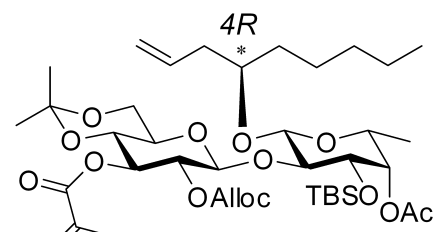

EDB-Ipom-1-112-A-150608 HSQC

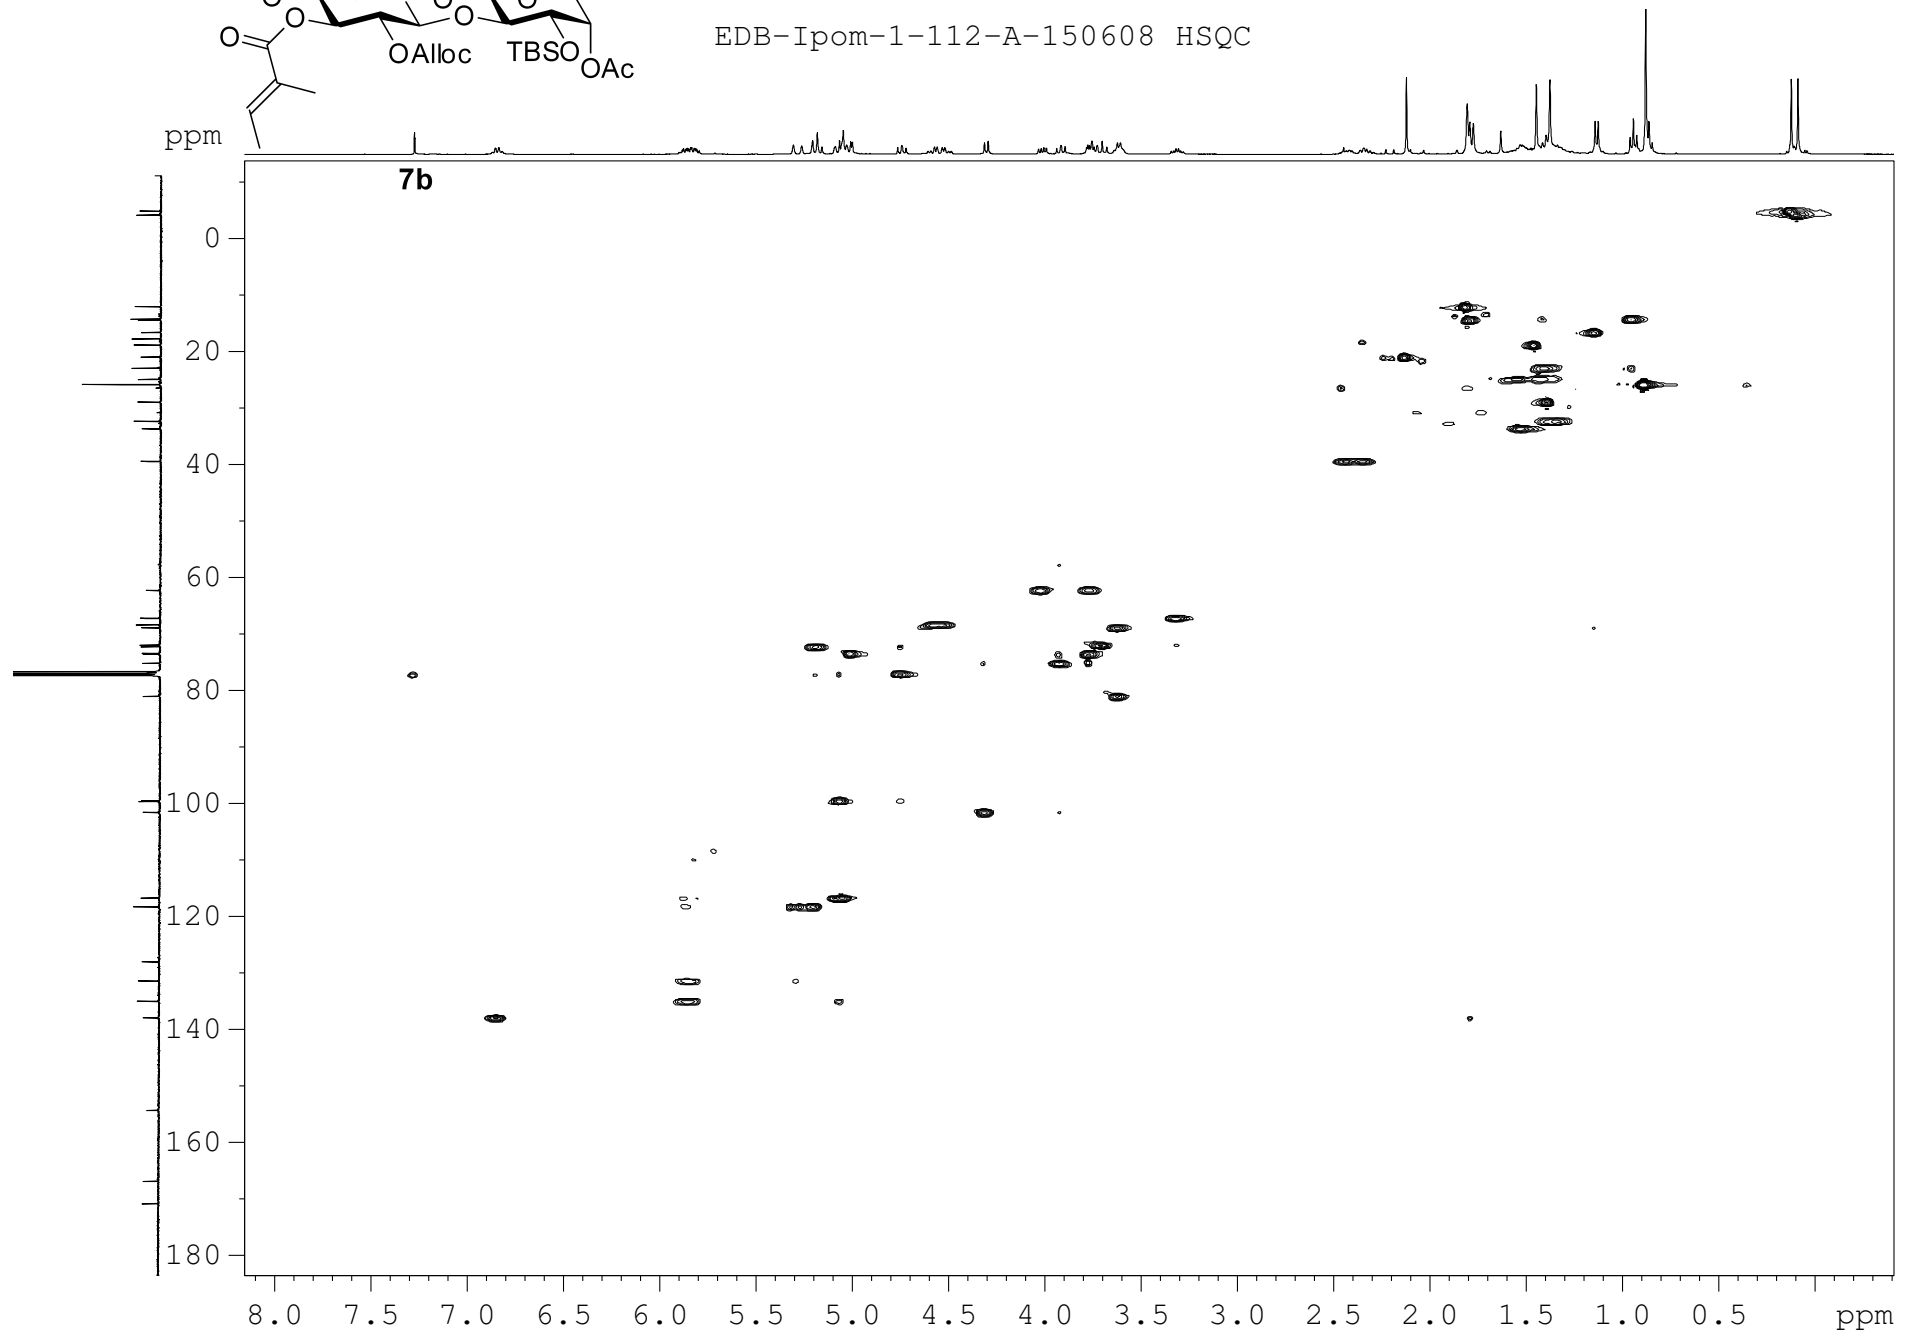

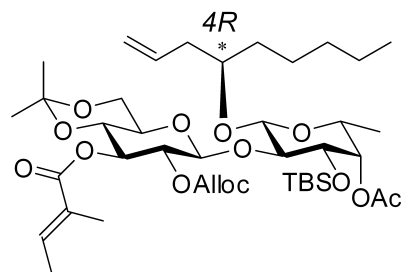EDB-Ipom-1-112-A-150608 HMBC in CDCl<sub>3</sub>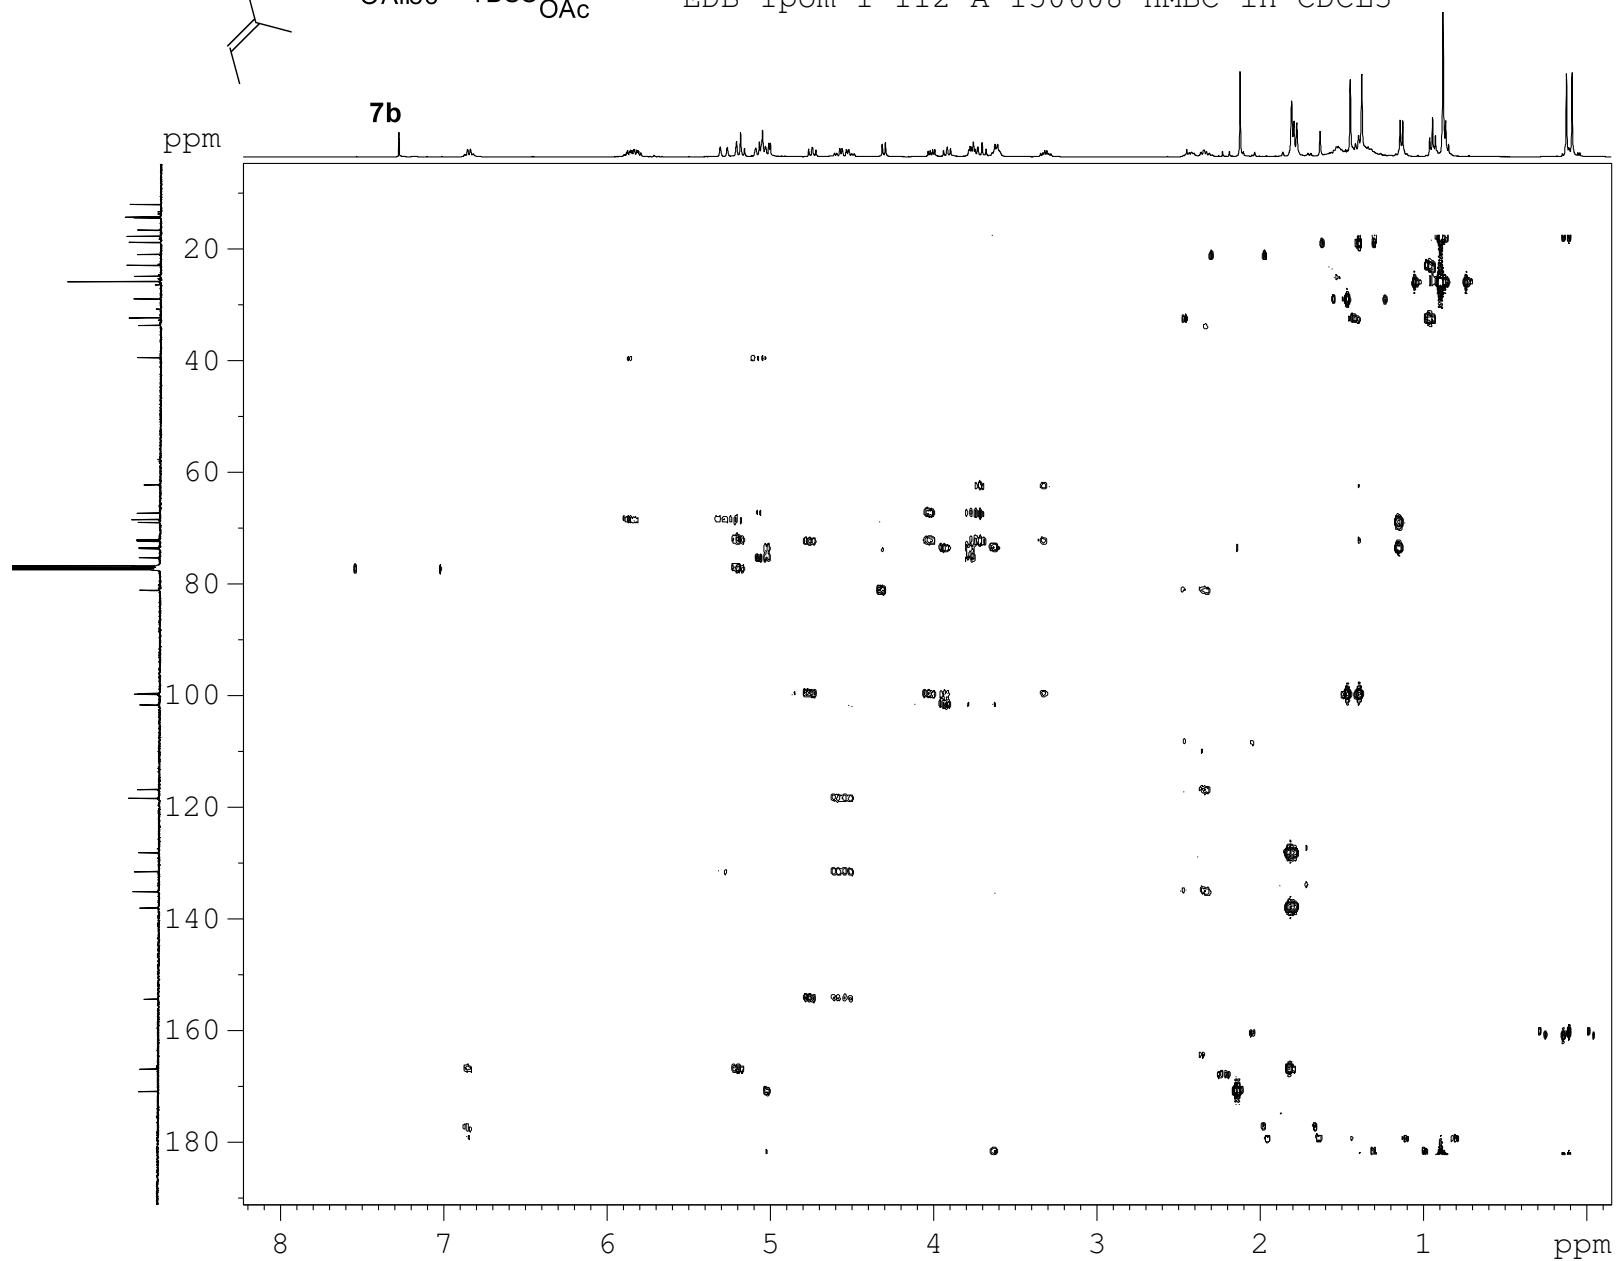

```

NAME      EDB-Ipom-1-112-A-150608
EXPNO     5
PROCNO    1
Date_     20150611
Time      3.11
INSTRUM   spect
PROBHD    5 mm PABBO BB-
PULPROG   hmbcgp1pndqf
TD         4096
SOLVENT   CDCl3
NS         50
DS         16
SWH       5208.333 Hz
FIDRES    1.271566 Hz
AQ         0.3932660 sec
RG         2050
DW         96.000 usec
DE         6.50 usec
TE         292.6 K
CNST2     145.0000000
CNST13    10.0000000
D0         0.00000300 sec
D1         1.50000000 sec
D2         0.00344828 sec
D6         0.05000000 sec
D16        0.00020000 sec
IN0        0.00003010 sec

```

```

===== CHANNEL f1 =====
NUC1      1H
P1        10.00 usec
P2        20.00 usec
PL1       -3.50 dB
PL1W      31.17620277 W
SFO1      400.1325208 MHz

```

```

===== CHANNEL f2 =====
NUC2      13C
P3        10.00 usec
P4        -2.10 dB
PL2W      58.37759399 W
SFO2      100.6228138 MHz

```

```

===== GRADIENT CHANNEL =====
GPNAM1    SINE.100
GPNAM2    SINE.100
GPNAM3    SINE.100
GPZ1      50.00 %
GPZ2      30.00 %
GPZ3      40.10 %
P16       1000.00 usec
ND0        2
TD         128
SFO1      100.6228 MHz
FIDRES    129.709091 Hz
SW         165.000 ppm
FnMODE    QF
SI         2048
SF         400.1300000 MHz
WDW       SINE
SSB        0
LB         0.00 Hz
GB         0
PC         4.00
SI         1024
MC2       QF
SF         100.6127690 MHz
WDW       SINE
SSB        0
LB         0.00 Hz
GB         0

```

ZGH-*Ipom*-2-12-A-140120 check again 1H in CDCL<sub>3</sub>

7.270  
5.035  
5.031  
5.027  
5.006  
4.997  
4.993  
4.990  
4.988  
4.985  
4.977  
4.965  
4.960  
4.954  
4.936  
4.932  
4.917  
4.375  
4.355  
4.324  
4.055  
3.908  
3.648  
3.632  
3.583  
3.564  
3.561  
3.542  
2.943  
2.931  
2.751  
2.707  
2.570  
2.471  
2.453  
2.434  
2.312  
2.295  
2.128  
2.062  
2.044  
1.850  
1.848  
1.825  
1.822  
1.807  
1.805  
1.722  
1.702  
1.684  
1.666  
1.319  
1.302  
1.288  
1.279  
1.146  
1.130  
0.904  
0.887  
0.872  
0.793  
0.141  
0.099  
0.016

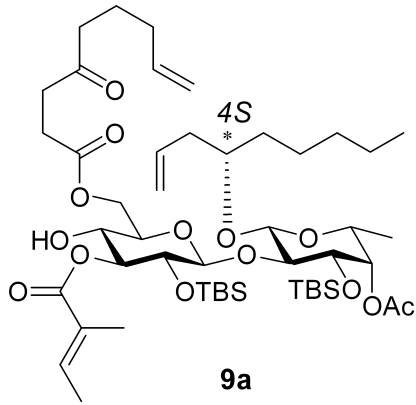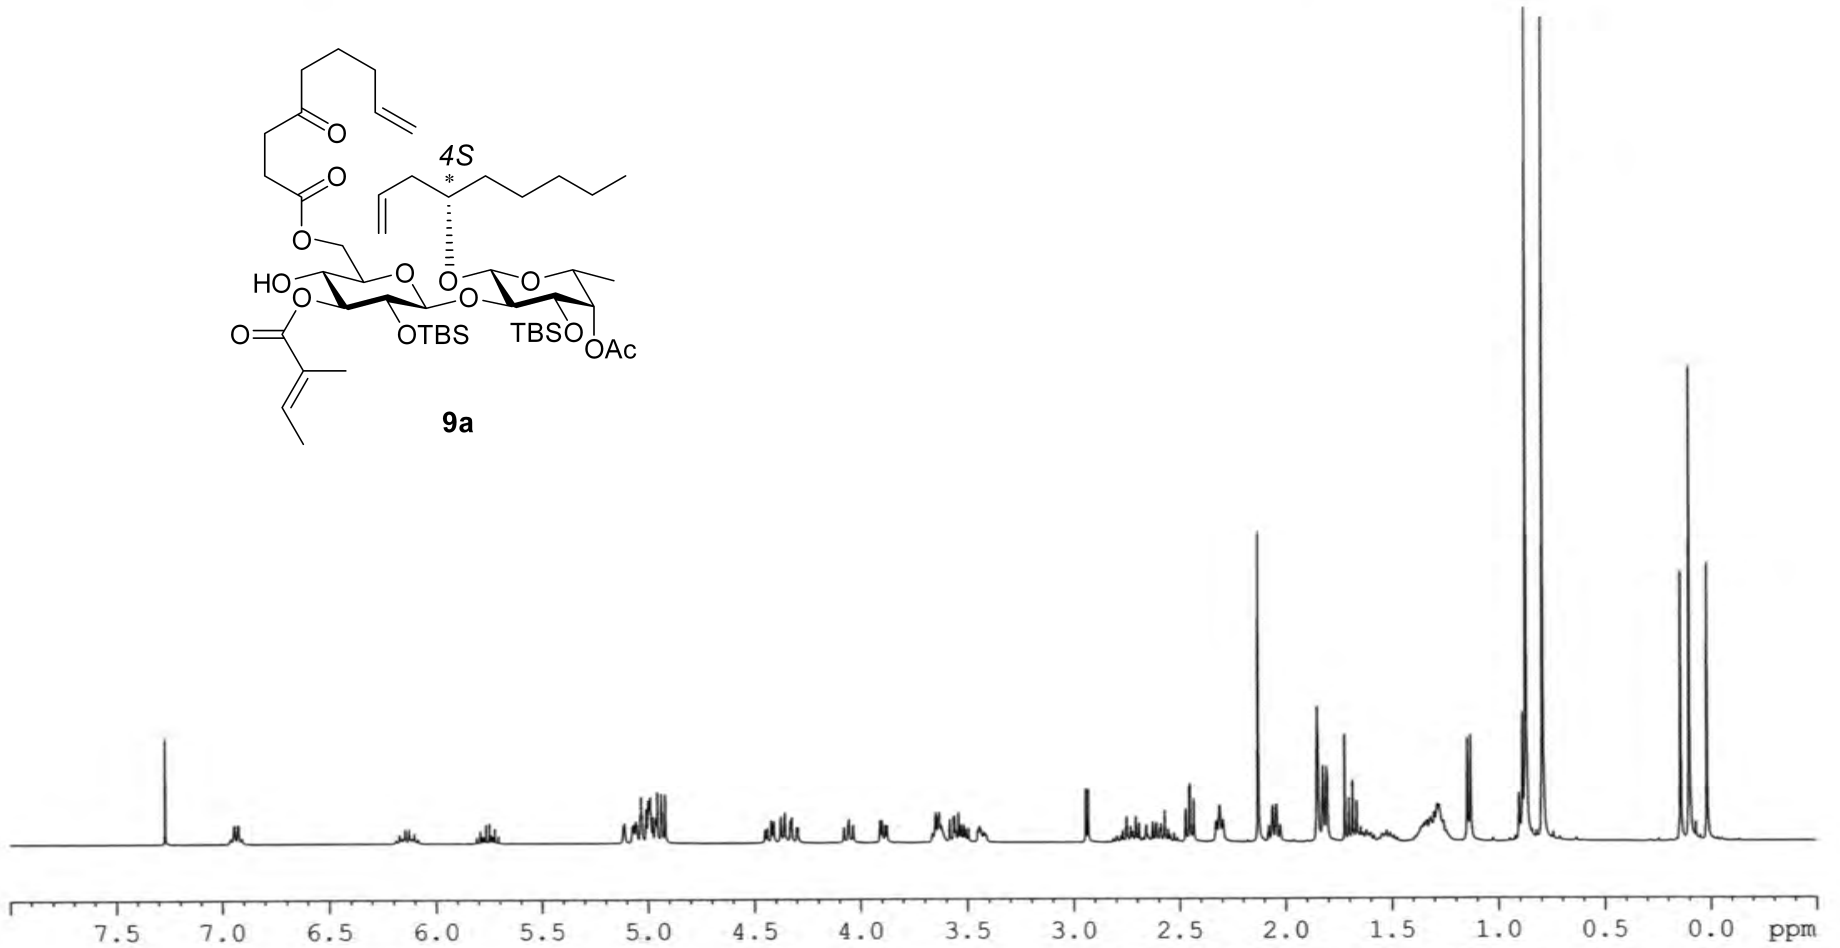



ZGH-*Ipom*-2-12-A-140120 check again  $^{13}\text{C}$  in  $\text{CDCl}_3$ 

— 208.616

 173.175  
 170.908  
 168.934

 138.520  
 137.852  
 136.120  
 — 128.227

 116.232  
 115.267

 100.831  
 99.915  
 80.769

 78.602  
 77.319  
 77.205  
 77.001  
 76.683

 74.129  
 74.019  
 73.756  
 73.734  
 73.401

 70.050  
 68.901  
 63.301

 41.773  
 38.550  
 37.086

 34.422  
 33.001  
 31.889

 27.727  
 25.801  
 24.538

 22.678  
 22.589  
 21.014

 18.053  
 17.611  
 16.648

 14.424  
 14.044
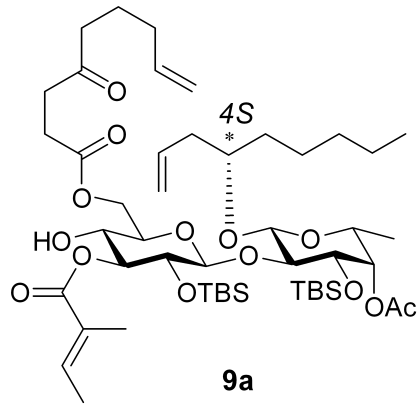
 — 3.155  
 — 3.992  
 — 4.310  
 — 5.318

-4 ppm

210 200 190 180 170 160 150 140 130 120 110 100 90 80 70 60 50 40 30 20 10 0 ppm

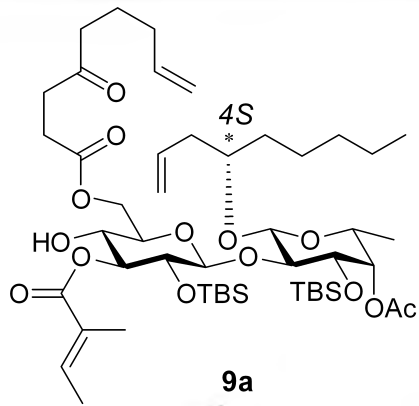

ZGH-Ipom-2-12-A-131217 COSY

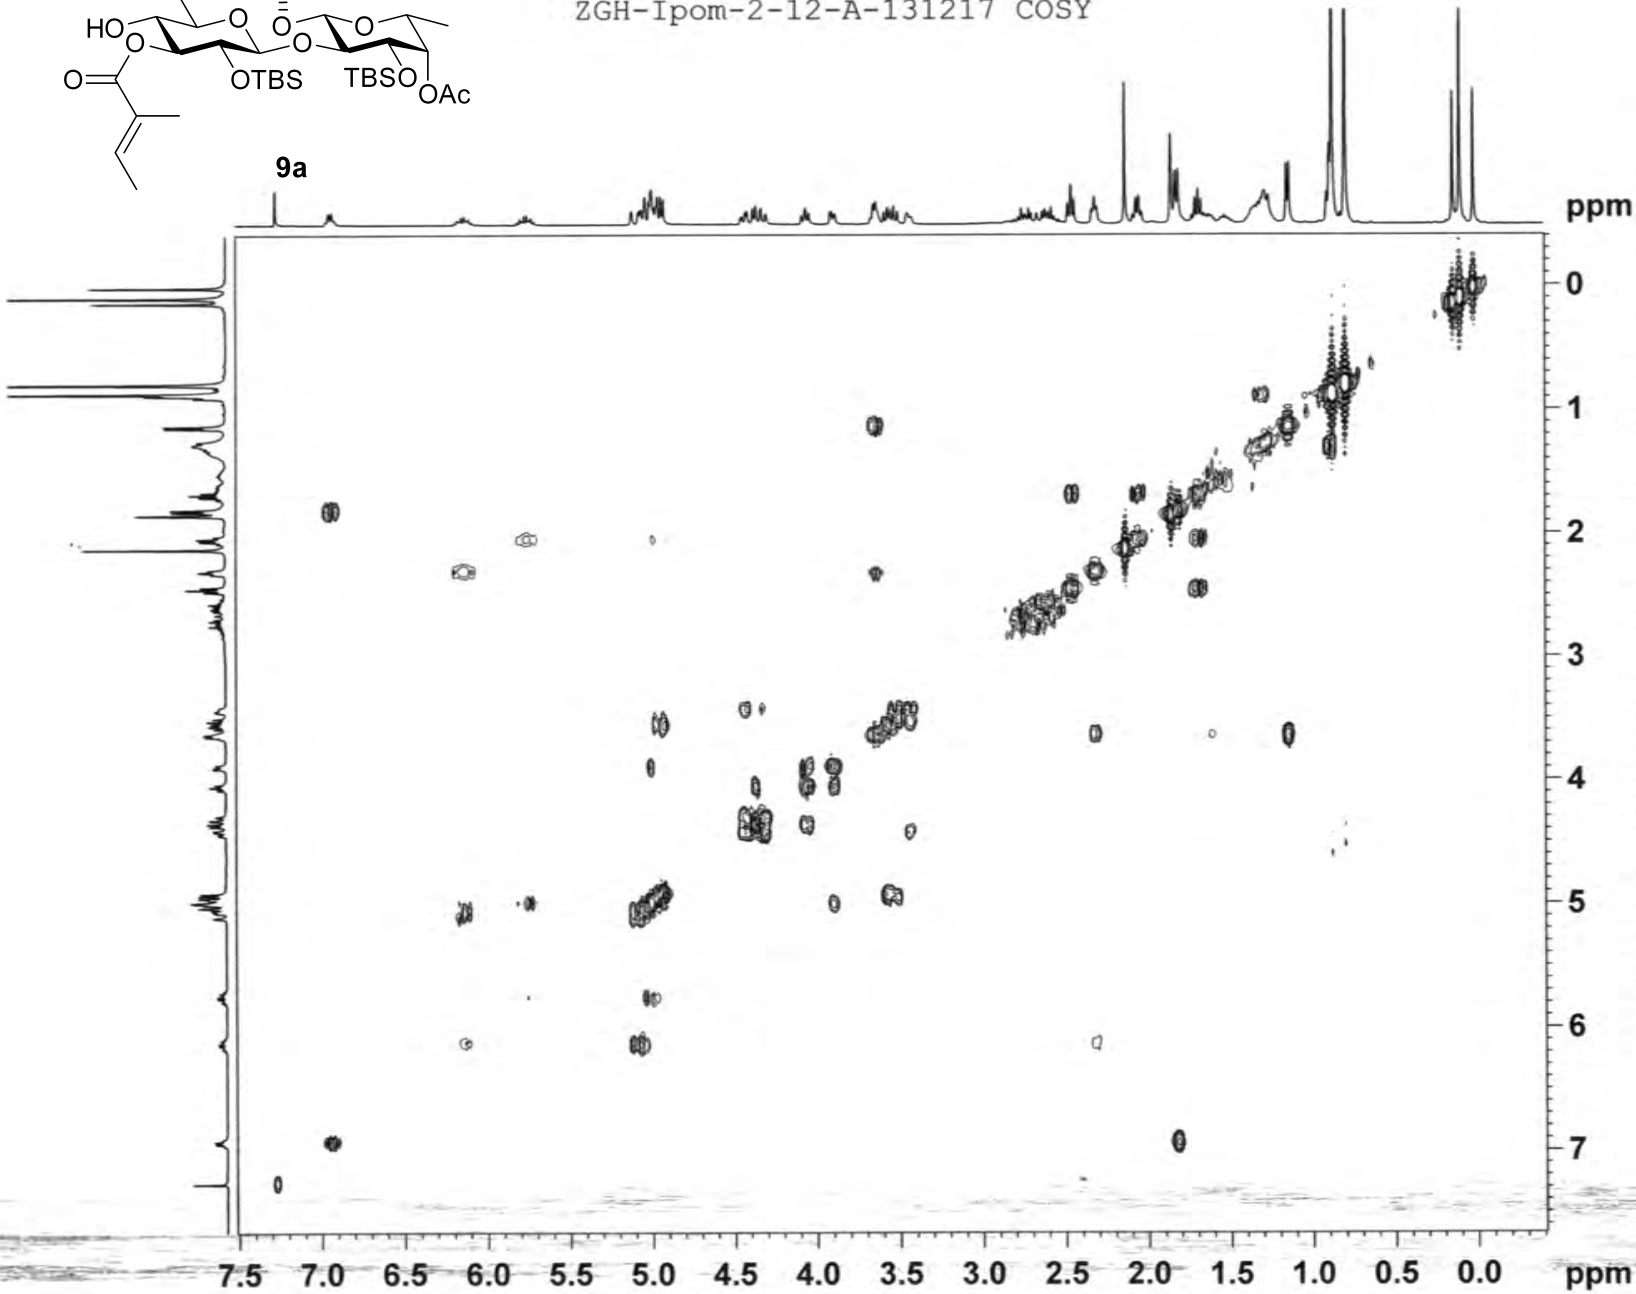

ppm

0

1

2

3

4

5

6

7

ppm

```

NAME      ZGH-Ipom-2-12-A-131217
EXPNO     3
PROCNO    1
Date_     20131217
Time      21.13
INSTRUM   spect
PROBHD    5 mm PABBO BB-
PULPROG   cosygpqf
TD         2048
SOLVENT   CDCl3
NS         2
DS         8
SWH        5341.880 Hz
FIDRES     2.608340 Hz
AQ         0.1917428 sec
RG         101
DW         93.600 usec
DE         6.50 usec
TE         292.5 K
DO         0.00000300 sec
D1         1.48689198 sec
D13        0.00000400 sec
D16        0.00020000 sec
IN0        0.00018720 sec

```

```

===== CHANNEL f1 =====
NUC1      1H
P0        10.00 usec
P1        10.00 usec
PL1       -3.50 dB
PL1W      31.17620277 W
SFO1      400.1324057 MHz

```

```

===== GRADIENT CHANNEL =====
GPNAM1    SINE.100
GPZ1      10.00 %
P16       1000.00 usec
ND0        1
TD         128
SFO1      400.1324 MHz
FIDRES     41.733440 Hz
SW         13.350 ppm
FrMODE     QF
SI         1024
SF         400.1300040 MHz
WDW        SINE
SSB         0
LB         0.00 Hz
GB         0
PC         1.00
SI         1024
MC2        QF
SF         400.1300033 MHz
WDW        SINE
SSB         0
LB         0.00 Hz
GB         0

```

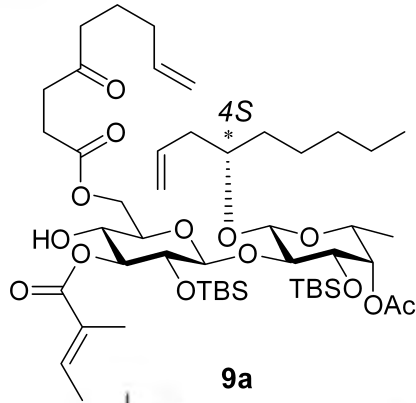ZGH-*Ipom*-2-12-A-131217 HSQC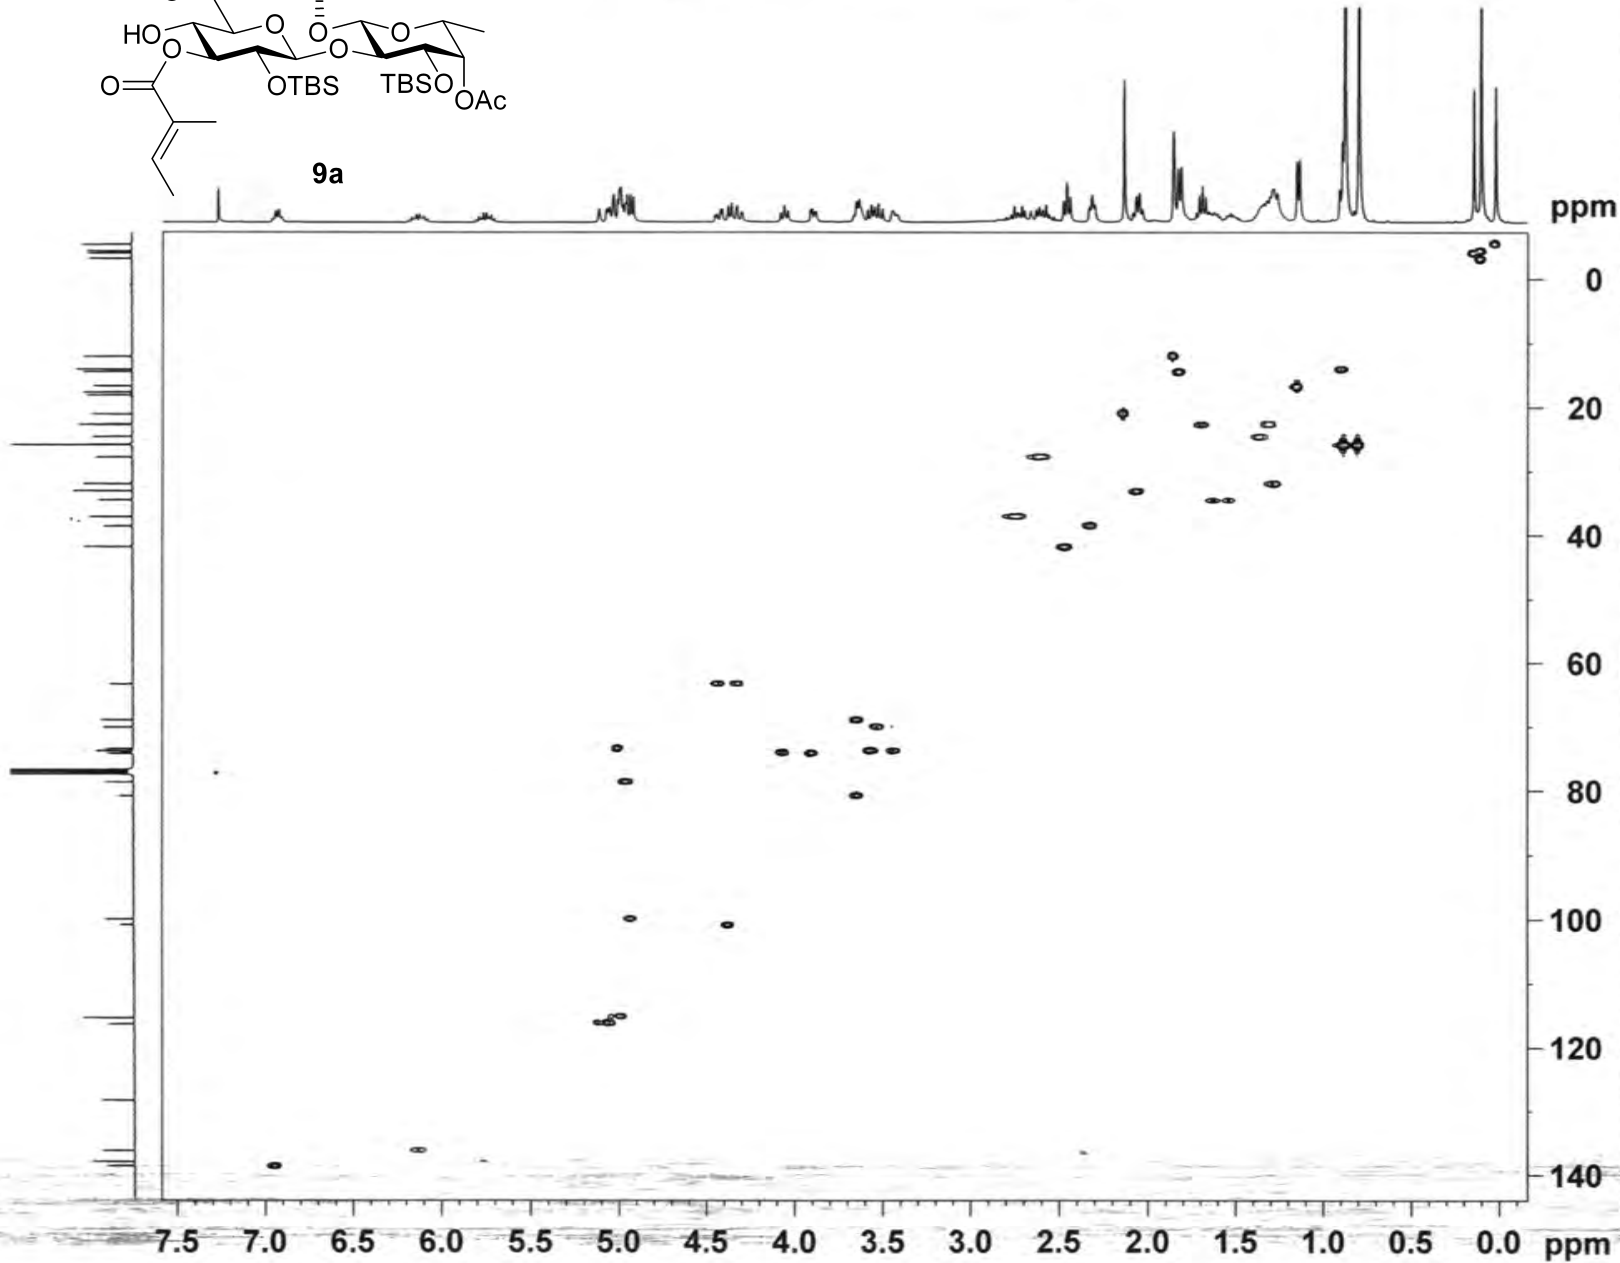

NAME ZGH-*Ipom*-2-12-A-131217  
 EXPNO 4  
 PROCNO 1  
 Date\_ 20131217  
 Time 20.58  
 INSTRUM spect  
 PROBHD 5 mm PABBO BB-  
 PULPROG hsqcetgpsi  
 TD 1024  
 SOLVENT CDCl3  
 NS 2  
 DS 16  
 SWH 5341.880 Hz  
 FIDRES 5.216680 Hz  
 AQ 0.0958964 sec  
 RG 2050  
 DW 93.600 usec  
 DE 6.50 usec  
 TE 292.8 K  
 CNST2 145.0000000  
 D0 0.00000300 sec  
 D1 1.50000000 sec  
 D4 0.00172414 sec  
 D11 0.03000000 sec  
 D13 0.00000400 sec  
 D16 0.00020000 sec  
 D24 0.00110000 sec  
 IN0 0.00003000 sec  
 ZGOPTNS

----- CHANNEL f1 -----  
 NUC1 1H  
 P1 10.00 usec  
 P2 20.00 usec  
 P28 1000.00 usec  
 PL1 -3.50 dB  
 PL1W 31.17620277 W  
 SFO1 400.1324057 MHz

----- CHANNEL f2 -----  
 CPDPRG2 garp  
 NUC2 13C  
 P3 10.00 usec  
 P4 20.00 usec  
 PCPD2 75.00 usec  
 PL2 -2.10 dB  
 PL12 15.40 dB  
 PL2W 58.37759399 W  
 PL12W 1.03811681 W  
 SFO2 100.6202727 MHz

----- GRADIENT CHANNEL -----  
 GPNAM1 SINE.100  
 GPNAM2 SINE.100  
 GPZ1 80.00 %  
 GPZ2 20.10 %  
 P16 1000.00 usec  
 ND0 2  
 TD 256  
 SFO1 100.6203 MHz  
 FIDRES 65.104164 Hz  
 SW 165.639 ppm  
 FnMODE Echo-Antiecho  
 SI 1024  
 SF 400.1300000 MHz  
 WDW QSINE  
 SSB 2  
 LB 0.00 Hz  
 GB 0  
 PC 1.00  
 SI 1024  
 MC2 echo-antiecho  
 SF 100.6127690 MHz  
 WDW QSINE  
 SSB 2  
 LB -0.00 Hz  
 GB 0

300 MHz

EDB-*Ipom*-1-64-A-140801 in CDCl<sub>3</sub>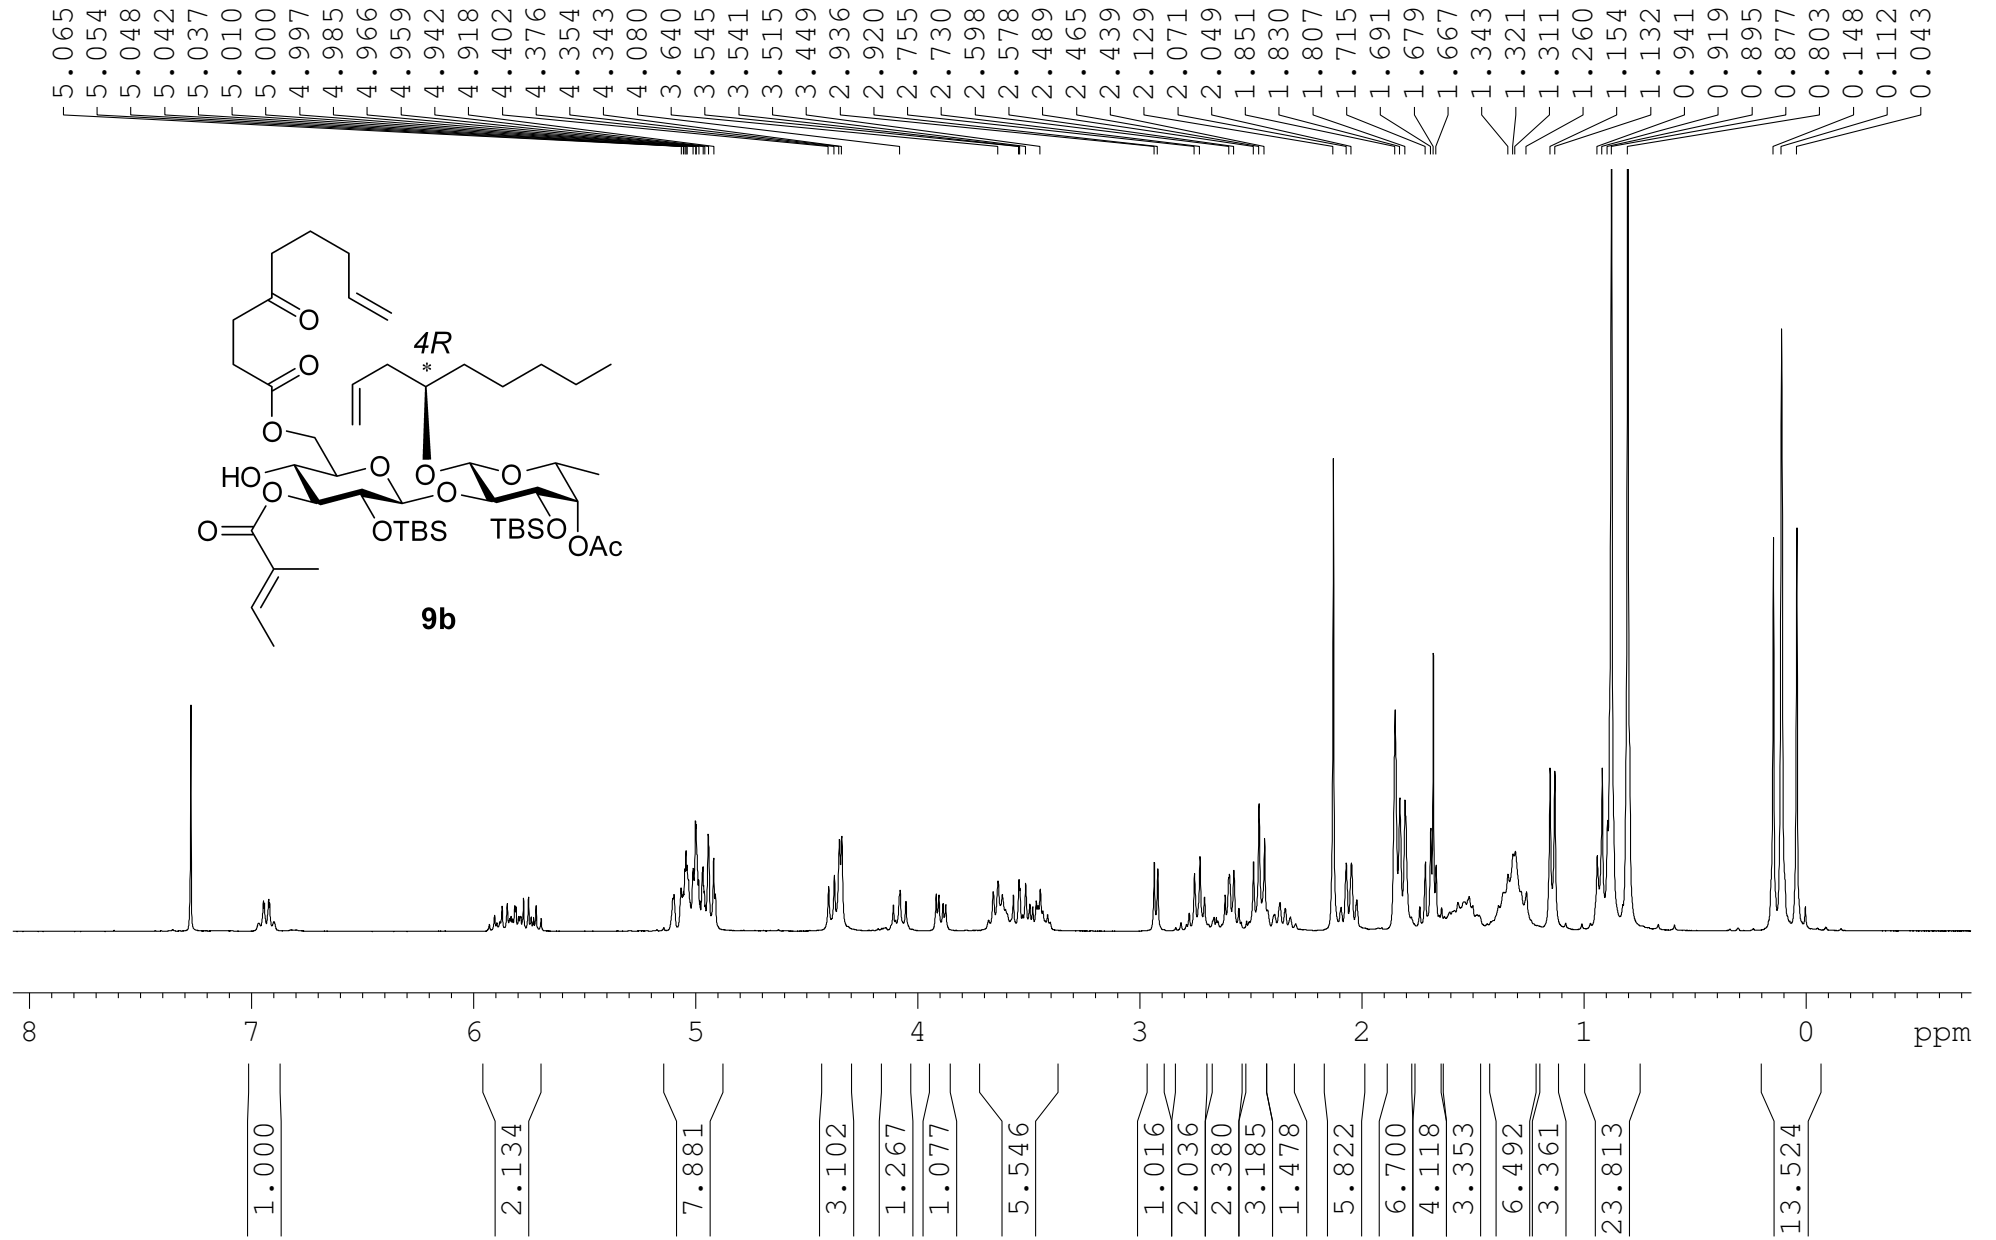

EDB-Ipom-1-64-A-140801 13C in CDCl3

300 MHz

208.66

173.08  
170.95  
169.08138.67  
137.89  
134.99

128.20

116.87  
115.31101.11  
99.9580.99  
79.01  
77.45  
77.24  
77.03  
76.61  
74.25  
73.87  
73.80  
73.43  
70.40  
68.84  
63.5741.82  
39.59  
37.13  
33.77  
33.03  
32.26  
27.70  
25.83  
25.32  
22.85  
22.71  
21.05  
18.09  
17.63  
16.72  
14.46  
14.26  
12.04  
-3.08  
-3.94  
-4.24  
-5.13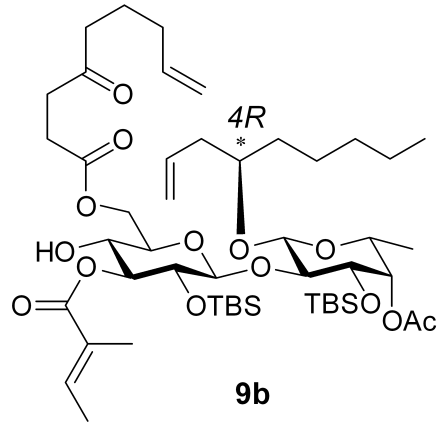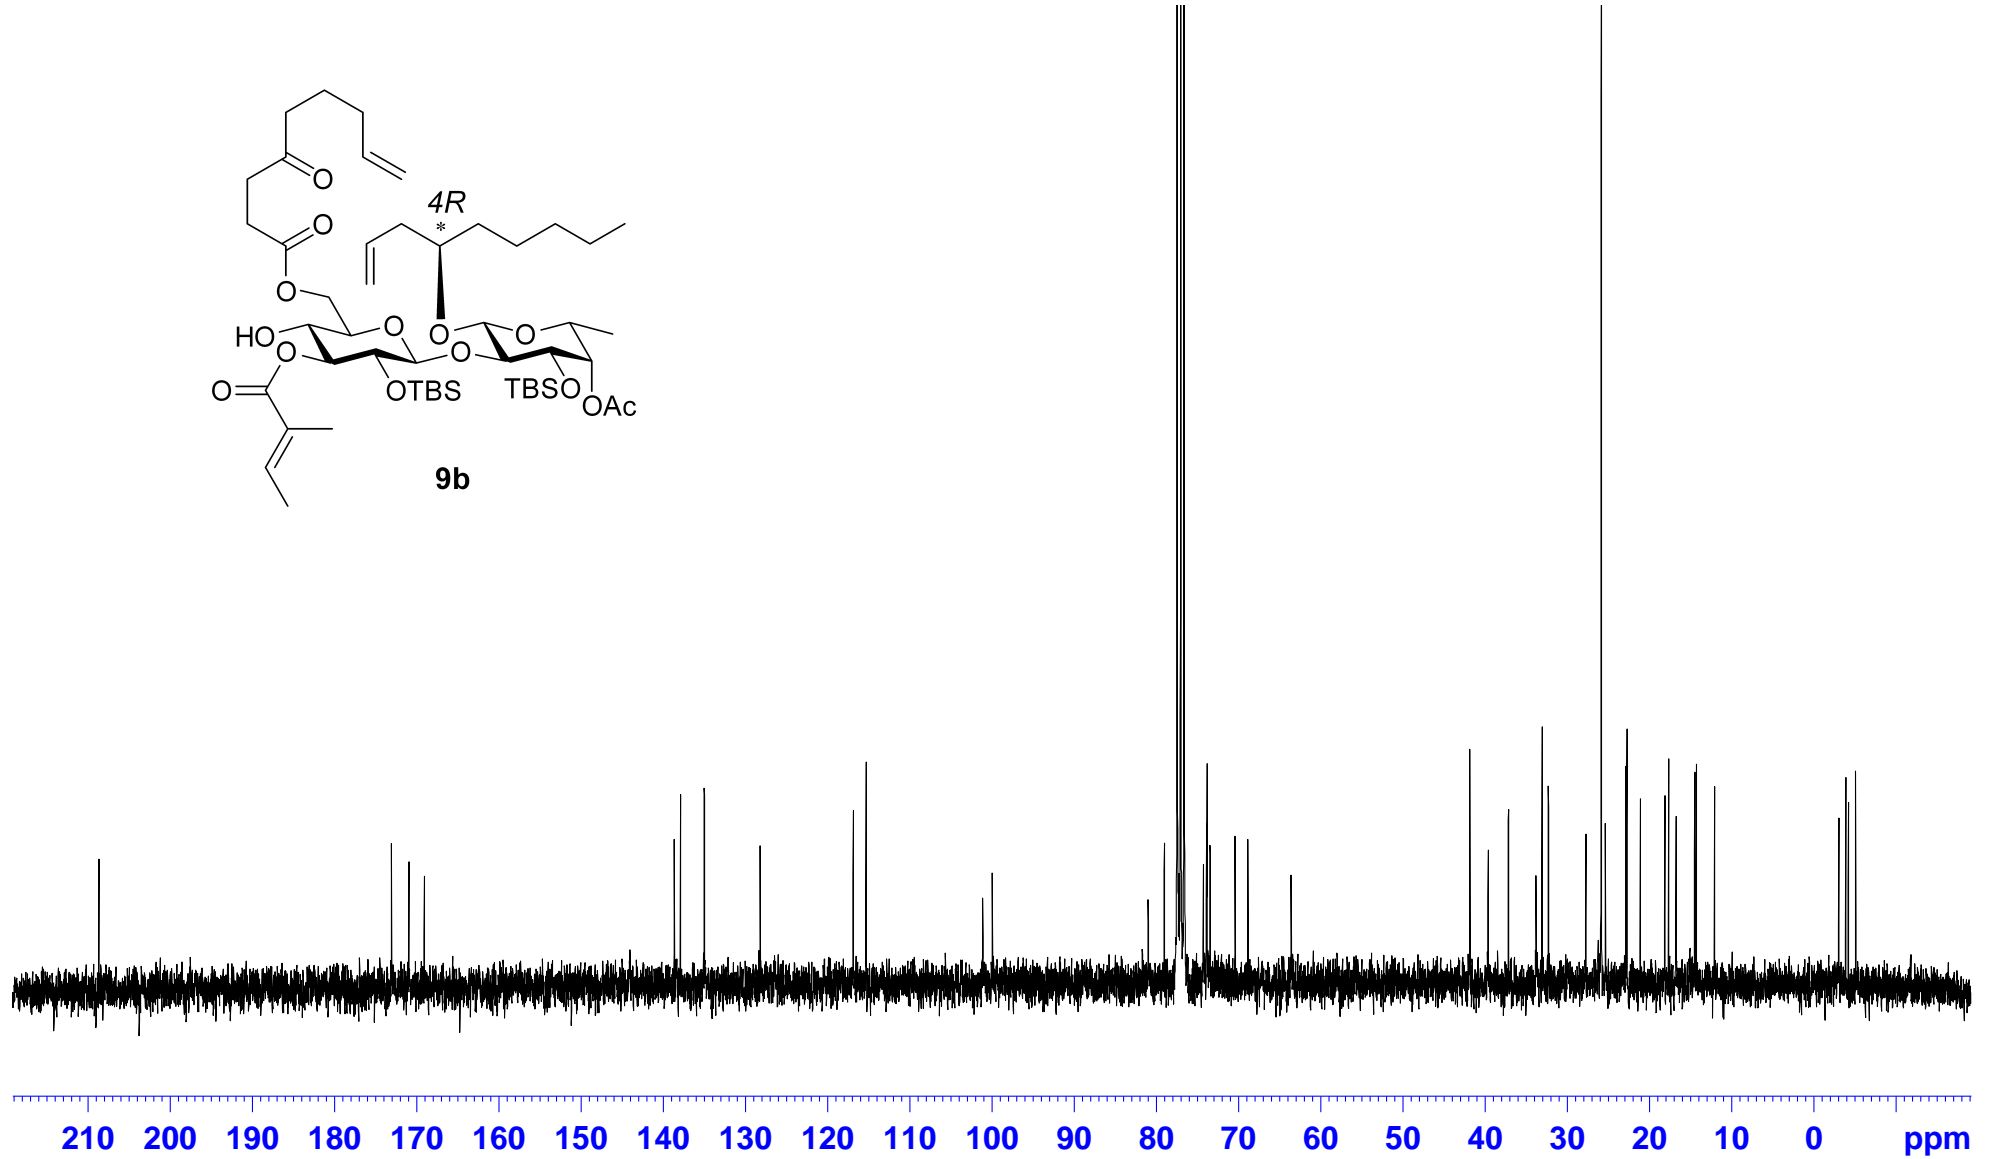

ZGH-*Ipom*-2-29-A-140430 1H in CDCl<sub>3</sub>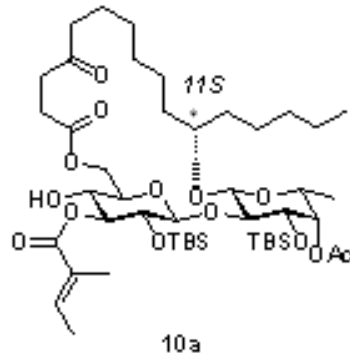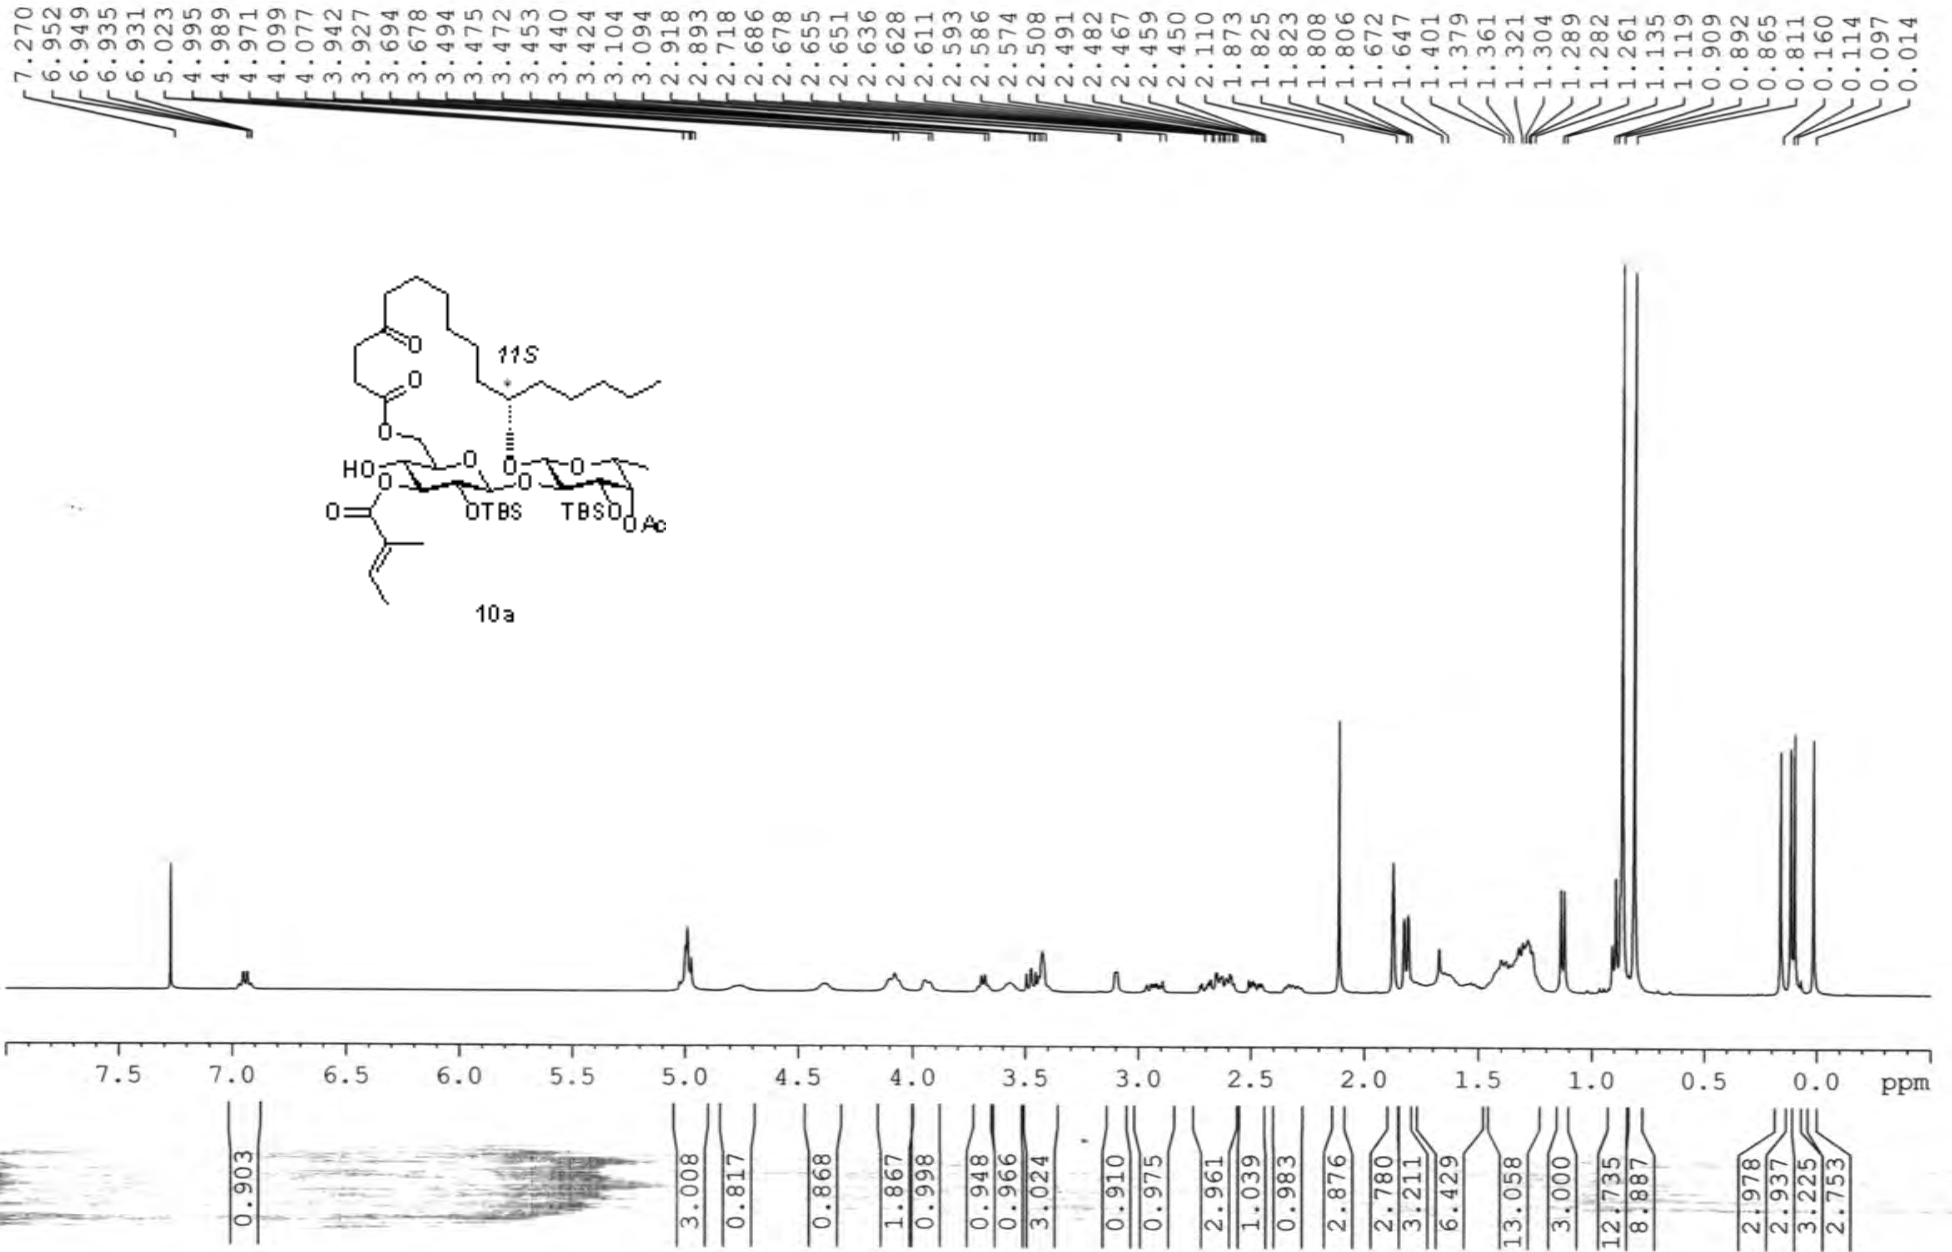

ZZGH-*Ipom*-2-29-A-140430 13C in CDCl<sub>3</sub>

— 210.271

 172.373  
 170.877  
 168.028

— 137.830

— 128.477

 100.744  
 100.210  
 78.019  
 77.319  
 77.206  
 77.001  
 76.683  
 74.493  
 73.992  
 73.891  
 73.650  
 69.032  
 68.684  
 63.338  
 41.818  
 37.103  
 34.869  
 31.989  
 29.079  
 28.504  
 28.296  
 25.892  
 25.770  
 25.226  
 24.483  
 23.360  
 22.566  
 20.947  
 18.026  
 17.579  
 16.646  
 14.374  
 14.030  
 12.020
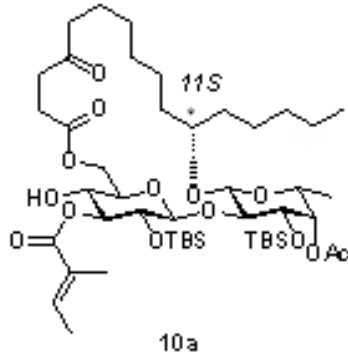

210 200 190 180 170 160 150 140 130 120 110 100 90 80 70 60 50 40 30 20 10 0 ppm

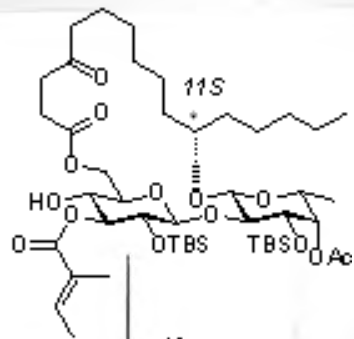ZGH-*Ipom*-2-29-A-140430 COSY

ppm

10a

NAME ZGH-*Ipom*-2-29-A-140430  
 EXPNO 2  
 PROCNO 1  
 Date\_ 20150317  
 Time\_ 14.23  
 INSTRUM spect  
 PROBHD 5 mm PABBO BB-  
 PULPROG cosygpgf  
 TD 2048  
 SOLVENT CDCl3  
 NS 4  
 DS 8  
 SWH 5341.880 Hz  
 FIDRES 2.608340 Hz  
 AQ 0.1917428 sec  
 RG 161  
 DW 93.600 usec  
 DE 6.50 usec  
 TE 292.4 K  
 D0 0.00000300 sec  
 D1 1.48689198 sec  
 D13 0.00000400 sec  
 D16 0.00020000 sec  
 INO 0.00018720 sec

----- CHANNEL f1 -----  
 NUC1 1H  
 P0 10.00 usec  
 P1 10.00 usec  
 PL1 -3.50 dB  
 PL1W 31.17620277 W  
 SFO1 400.1324057 MHz

----- GRADIENT CHANNEL -----  
 GPNAMI SINE.100  
 GPZ1 10.00 %  
 P16 1000.00 usec  
 NDO 1  
 TD 102  
 SFO1 400.1324 MHz  
 FIDRES 52.371376 Hz  
 SW 13.350 ppm  
 FMODE QF  
 SI 1024  
 SF 400.1300040 MHz  
 WDW SINE  
 SSB 0  
 LB 0.00 Hz  
 GB 0  
 FC 1.00  
 SI 1024  
 MC2 QF  
 SF 400.1300033 MHz  
 WDW SINE  
 SSB 0  
 LB 0.00 Hz  
 GB 0

7.0 6.5 6.0 5.5 5.0 4.5 4.0 3.5 3.0 2.5 2.0 1.5 1.0 0.5 ppm



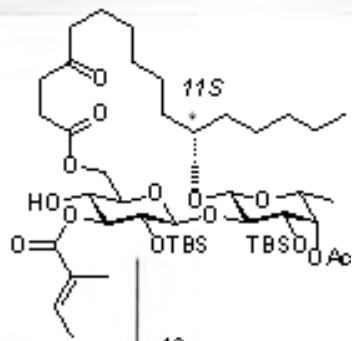

## ZGH-Ipom-2-29-A-140430 HSQC

NAME ZGH-Ipom-2-29-A-140430  
 EXPNO 4  
 PROCNO 1  
 Date 20150318  
 Time 7.02  
 INSTRUM spect  
 PROBHD 5 mm PABBO BB-  
 PULPROG hsqcetgpsi  
 TD 1024  
 SOLVENT CDCl3  
 NS 8  
 DS 16  
 SWH 5341.880 Hz  
 FIDRES 5.216680 Hz  
 AQ 0.0958964 sec  
 RG 2050  
 DW 93.600 usec  
 DE 6.50 usec  
 TE 293.0 K  
 CNST2 145.0000000  
 D0 0.00000300 sec  
 D1 1.50000000 sec  
 D4 0.00172414 sec  
 D11 0.03000000 sec  
 D13 0.00000400 sec  
 D16 0.00020000 sec  
 D24 0.00110000 sec  
 IN0 0.00003000 sec  
 ZGPTNS

----- CHANNEL f1 -----  
 NUC1 1H  
 P1 10.00 usec  
 P2 20.00 usec  
 P28 1000.00 usec  
 PL1 -3.50 dB  
 PL1W 31.17620277 W  
 SFO1 400.1324057 MHz

----- CHANNEL f2 -----  
 CPDPRG2 garp  
 NUC2 13C  
 P3 10.00 usec  
 P4 20.00 usec  
 PCPD2 75.00 usec  
 PL2 -2.10 dB  
 PL12 15.40 dB  
 PL2W 58.37759399 W  
 PL12W 1.03811681 W  
 SFO2 100.6202727 MHz

----- GRADIENT CHANNEL -----  
 GPNAM1 SINE.100  
 GPNAM2 SINE.100  
 GPZ1 80.00 %  
 GPZ2 20.10 %  
 P16 1000.00 usec  
 ND0 2  
 TD 256  
 SFO1 100.6203 MHz  
 FIDRES 65.104164 Hz  
 SW 165.639 ppm  
 PnMODE Echo-Antiecho  
 SI 1024  
 SF 400.1300000 MHz  
 WDW QSINE  
 SSB 2  
 LB 0.00 Hz  
 GB 0  
 PC 1.00  
 SI 1024  
 MC2 echo-antiecho  
 SF 100.6127690 MHz  
 WDW QSINE  
 SSB 2  
 LB 0.00 Hz  
 GB 0

ppm

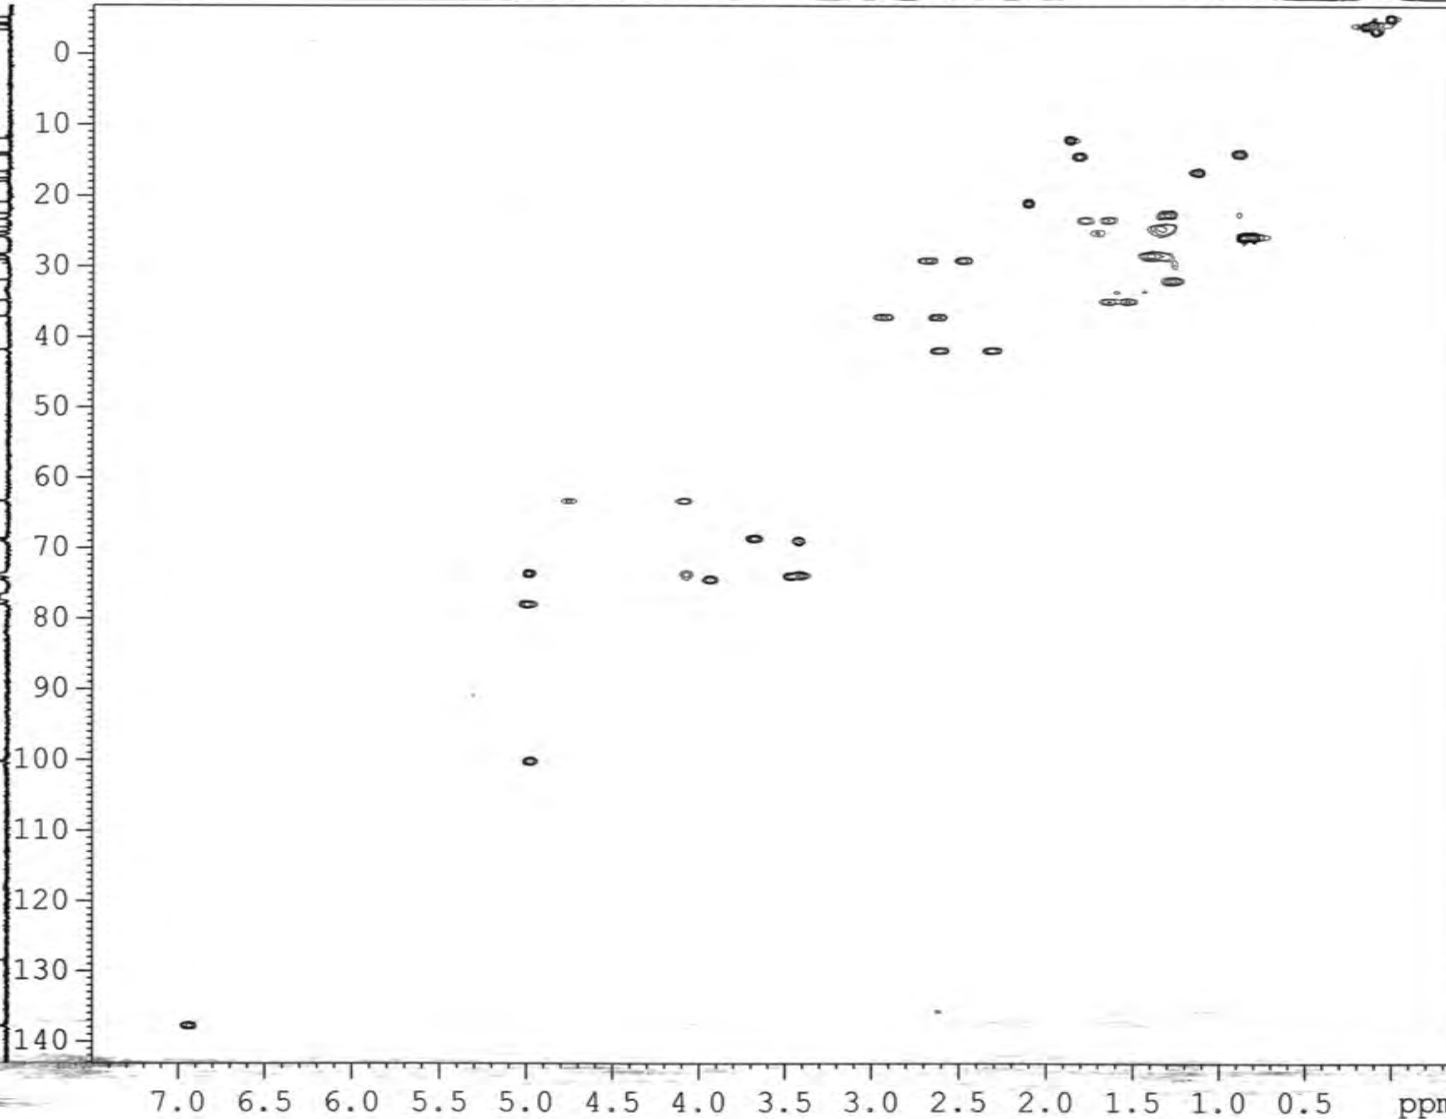

300 MHz

EDB-*Ipom*-1-66-A-140808 in CDCl<sub>3</sub>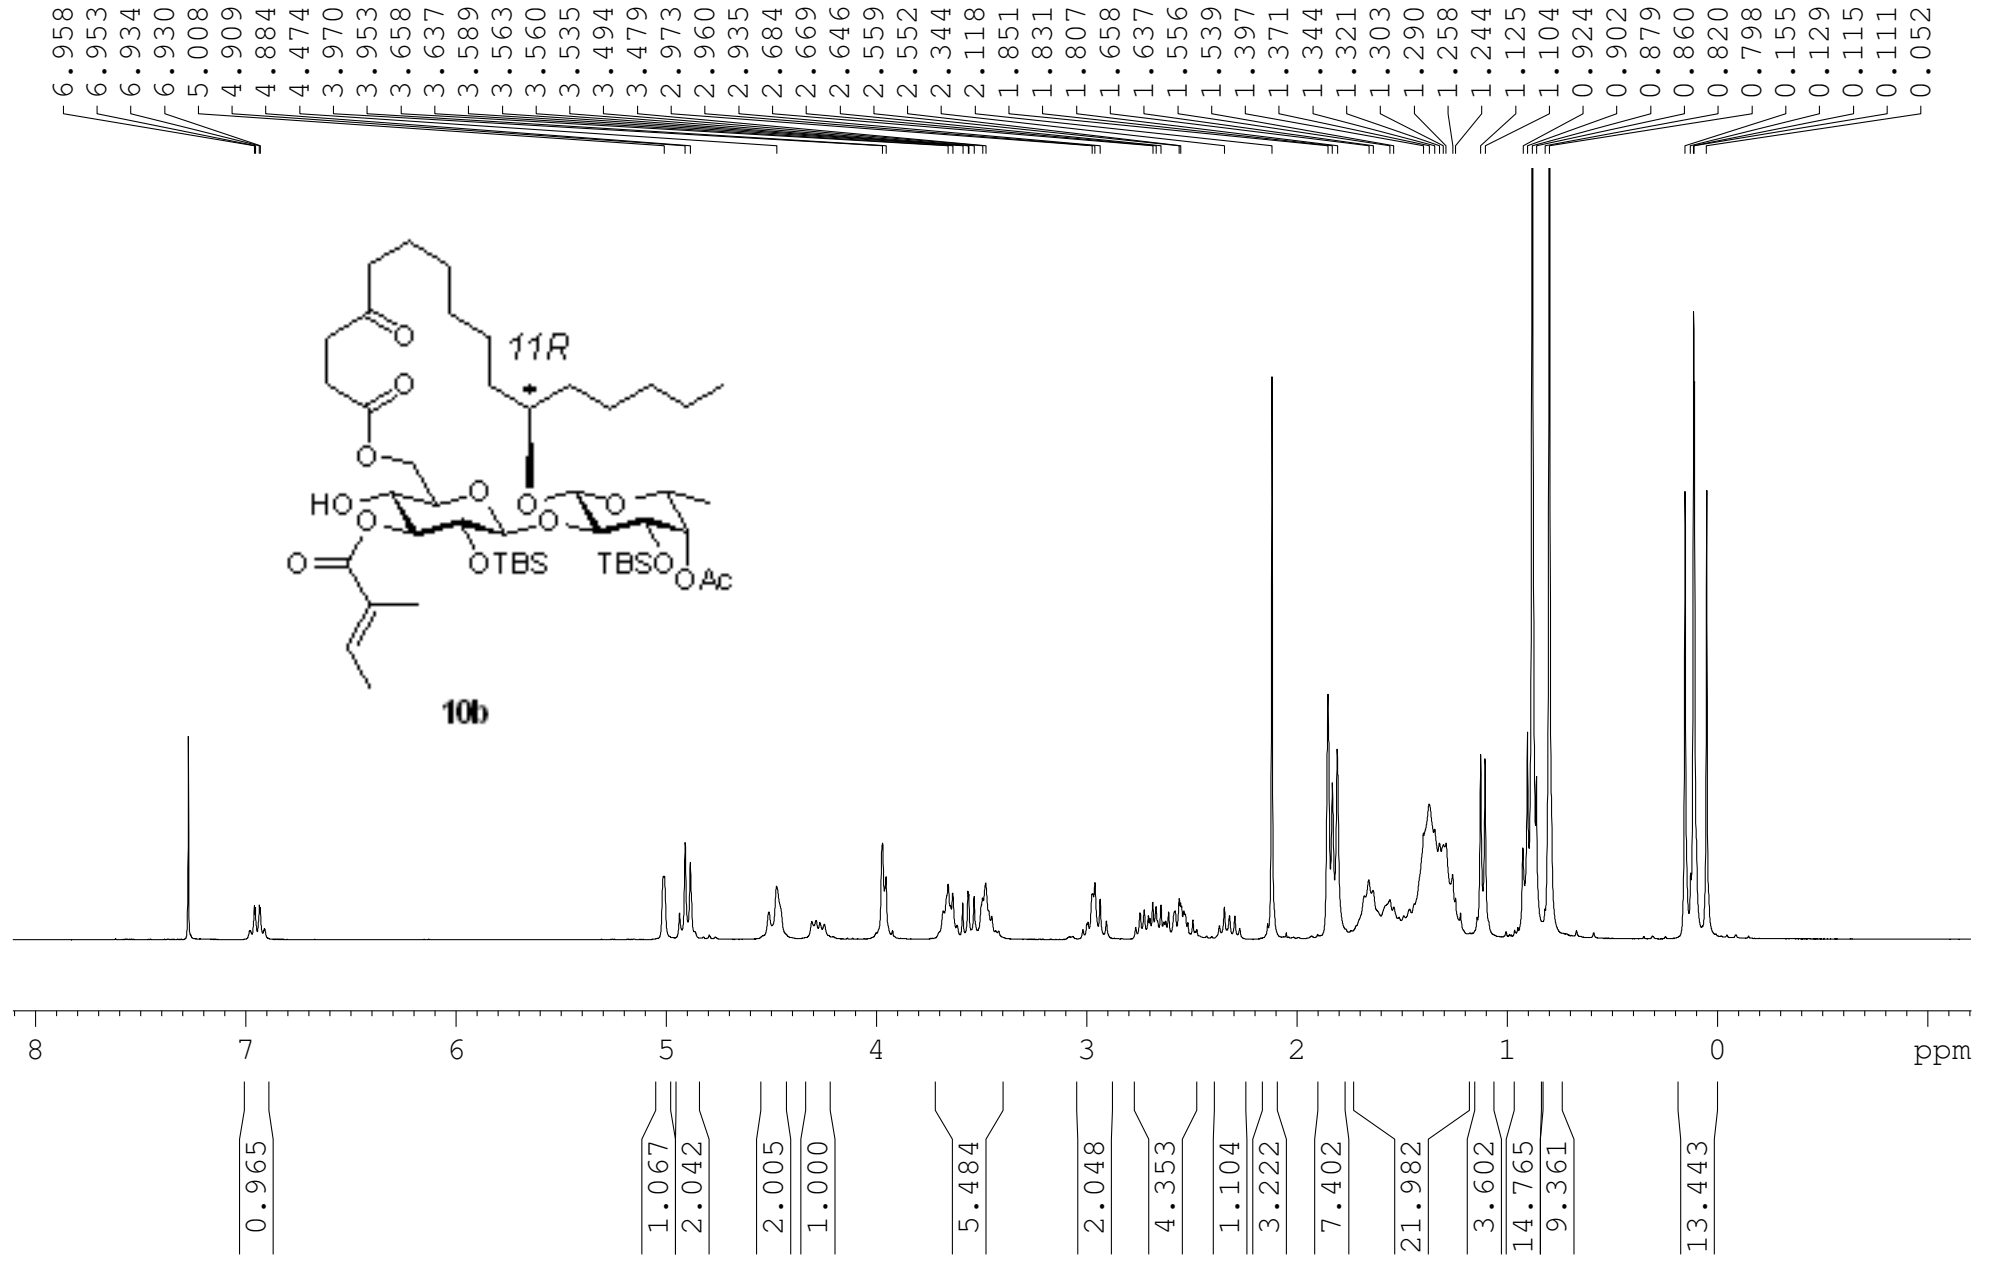

EDB-Ipom-1-66-A-140808 <sup>13</sup>C in CDCl<sub>3</sub>

300 MHz

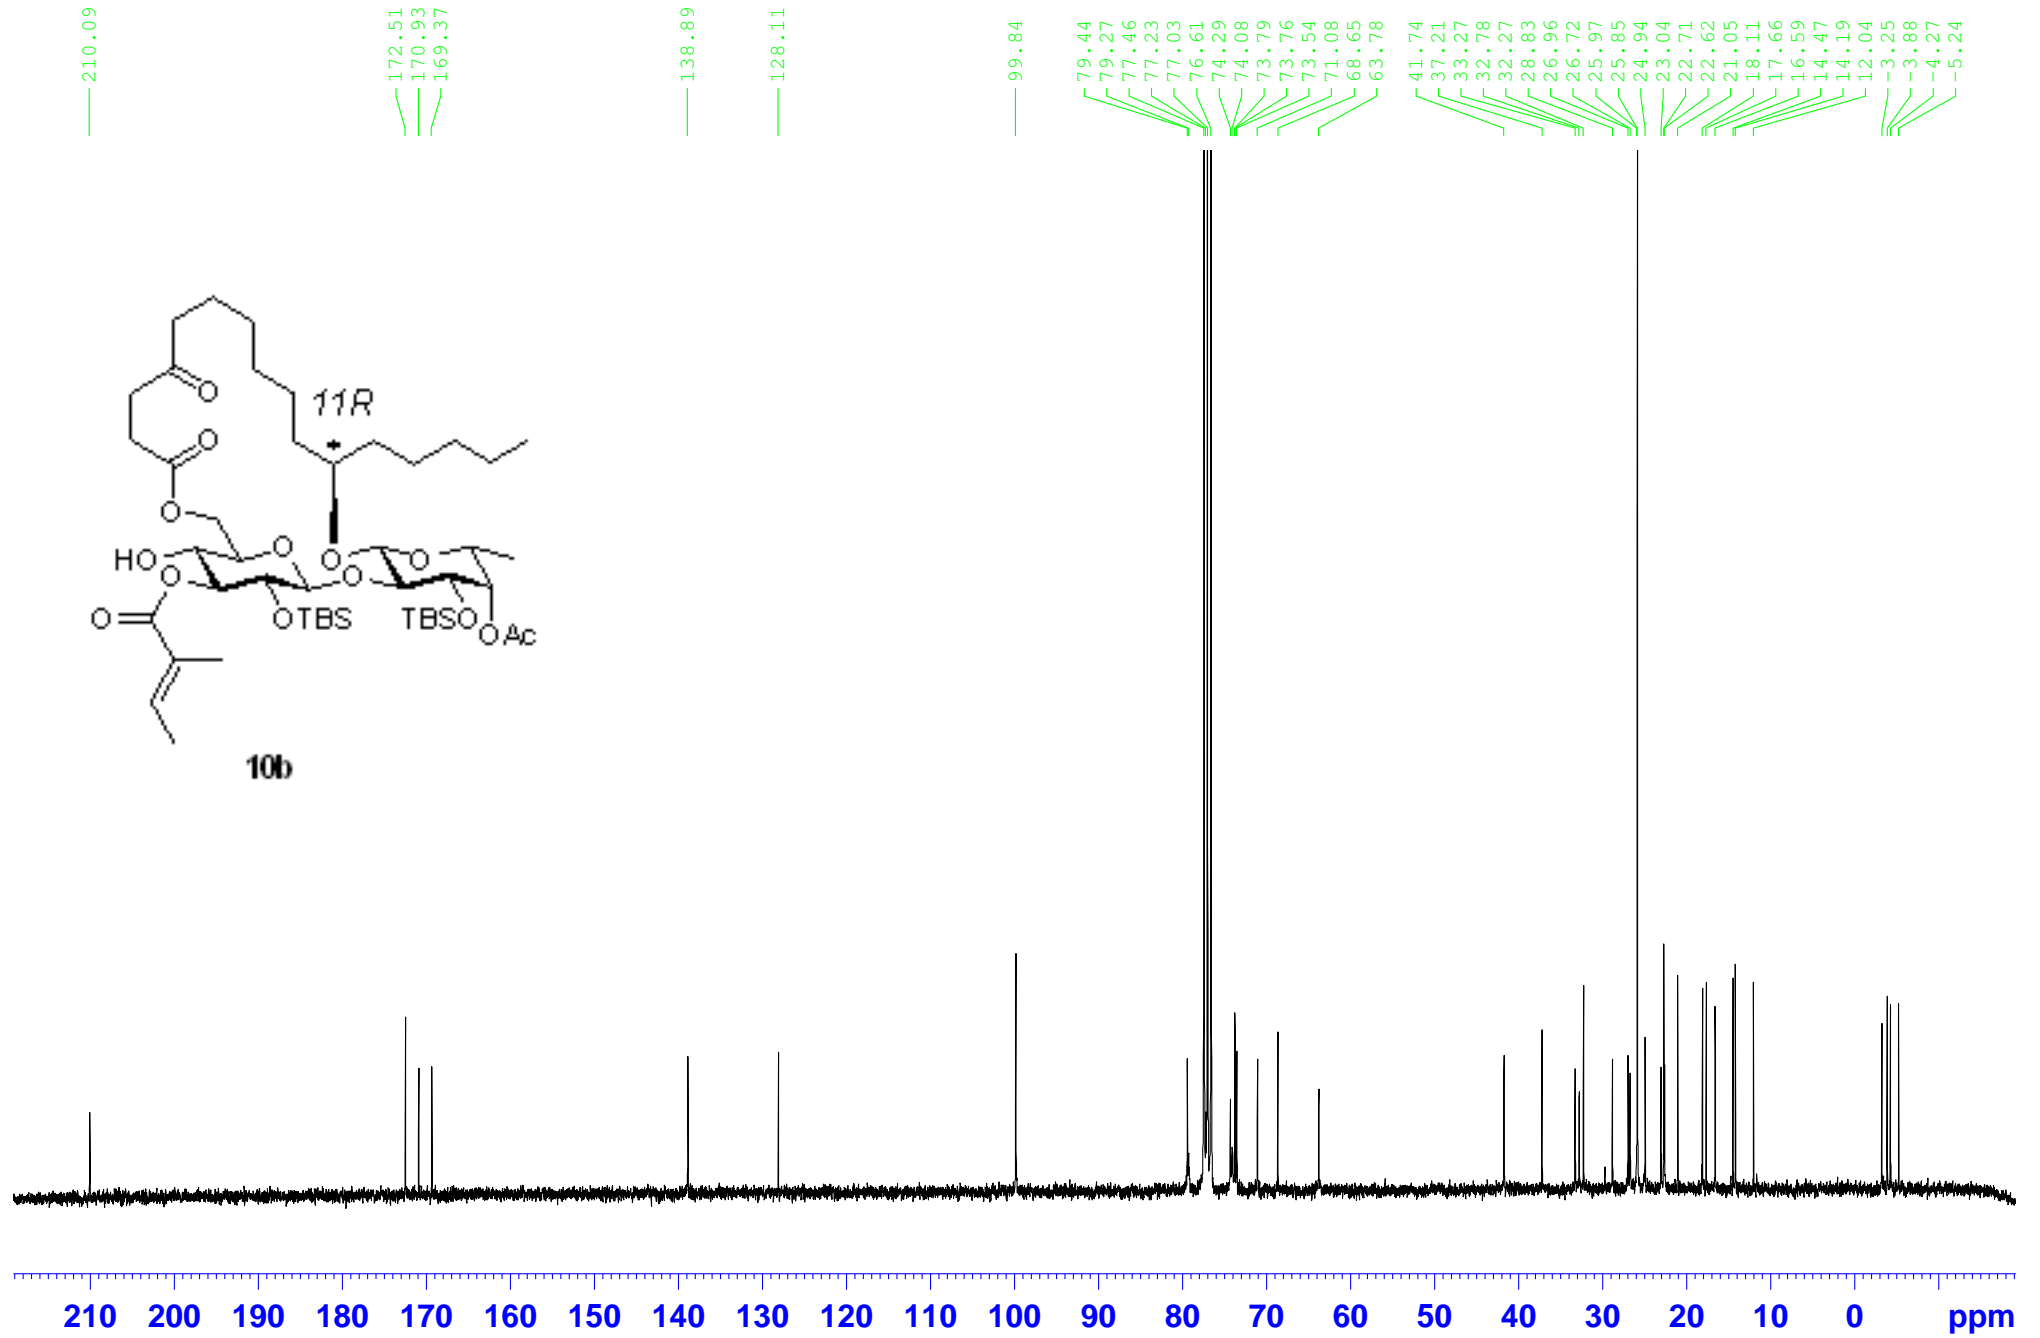

ZGH-*Ipom*-1-126-A-130827 1H in CDCL<sub>3</sub>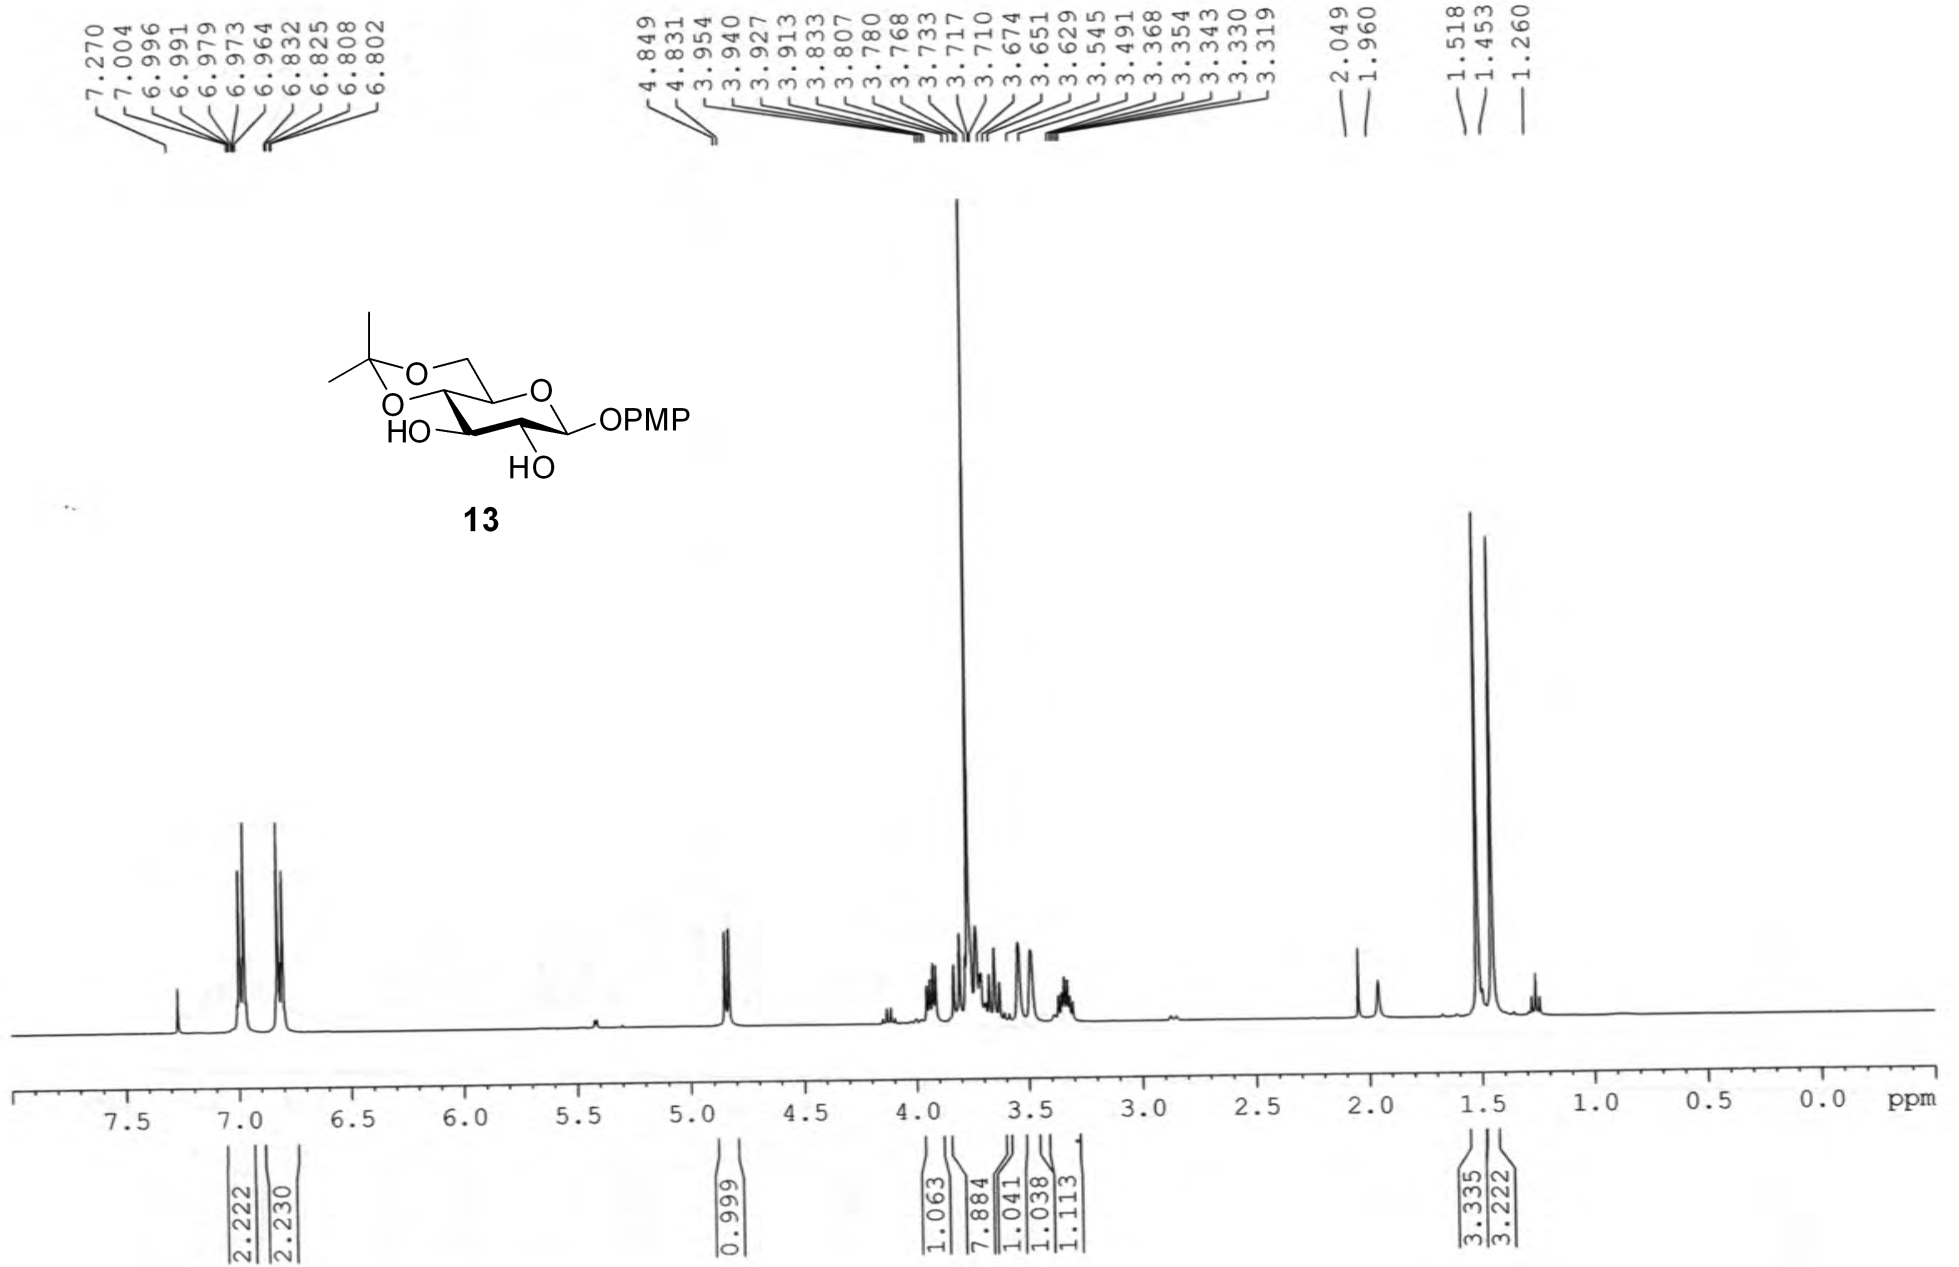

ZGH-*Ipom*-1-126-A-130827 <sup>13</sup>C in CDCl<sub>3</sub>— 155.552  
— 150.839— 118.516  
— 118.415  
— 114.534— 102.317  
— 99.883— 77.316  
— 76.998  
— 76.680  
— 74.359  
— 73.447  
— 72.961  
— 67.318  
— 61.959  
— 55.579

— 28.943

— 19.022

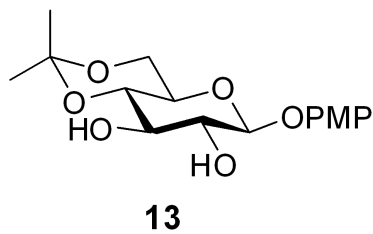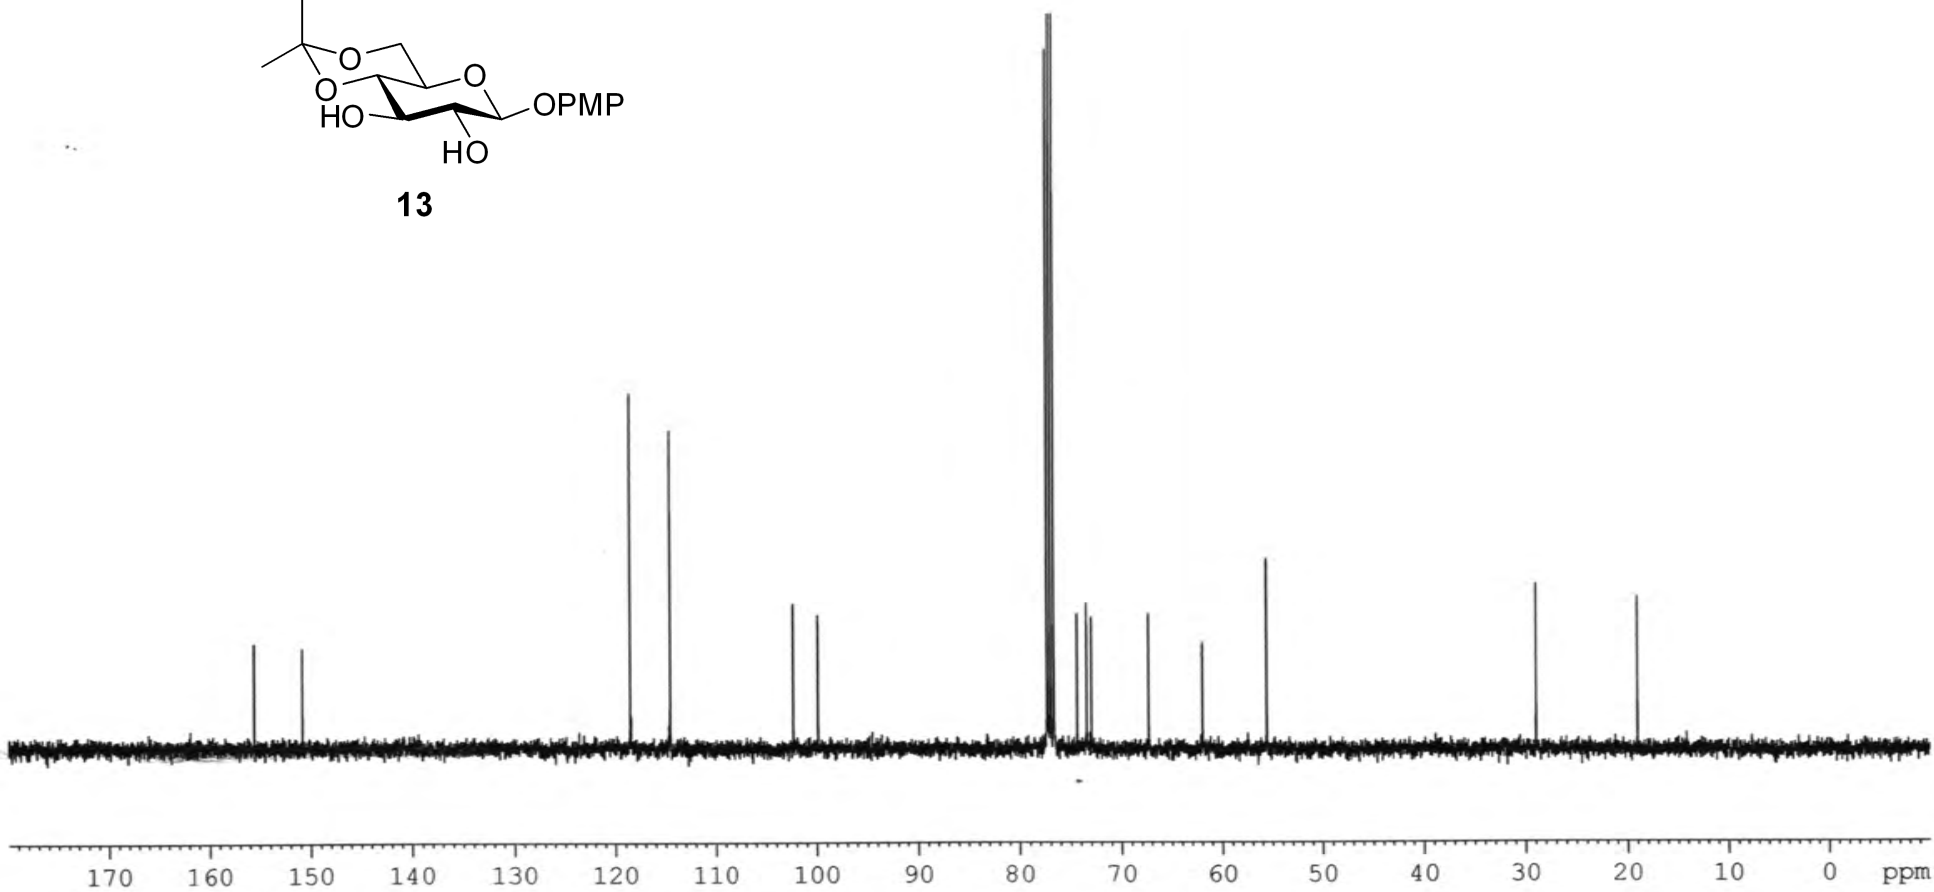

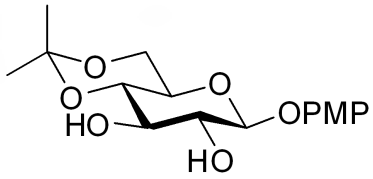

13

ZGH-Ipom-1-126-A-130827 COSY

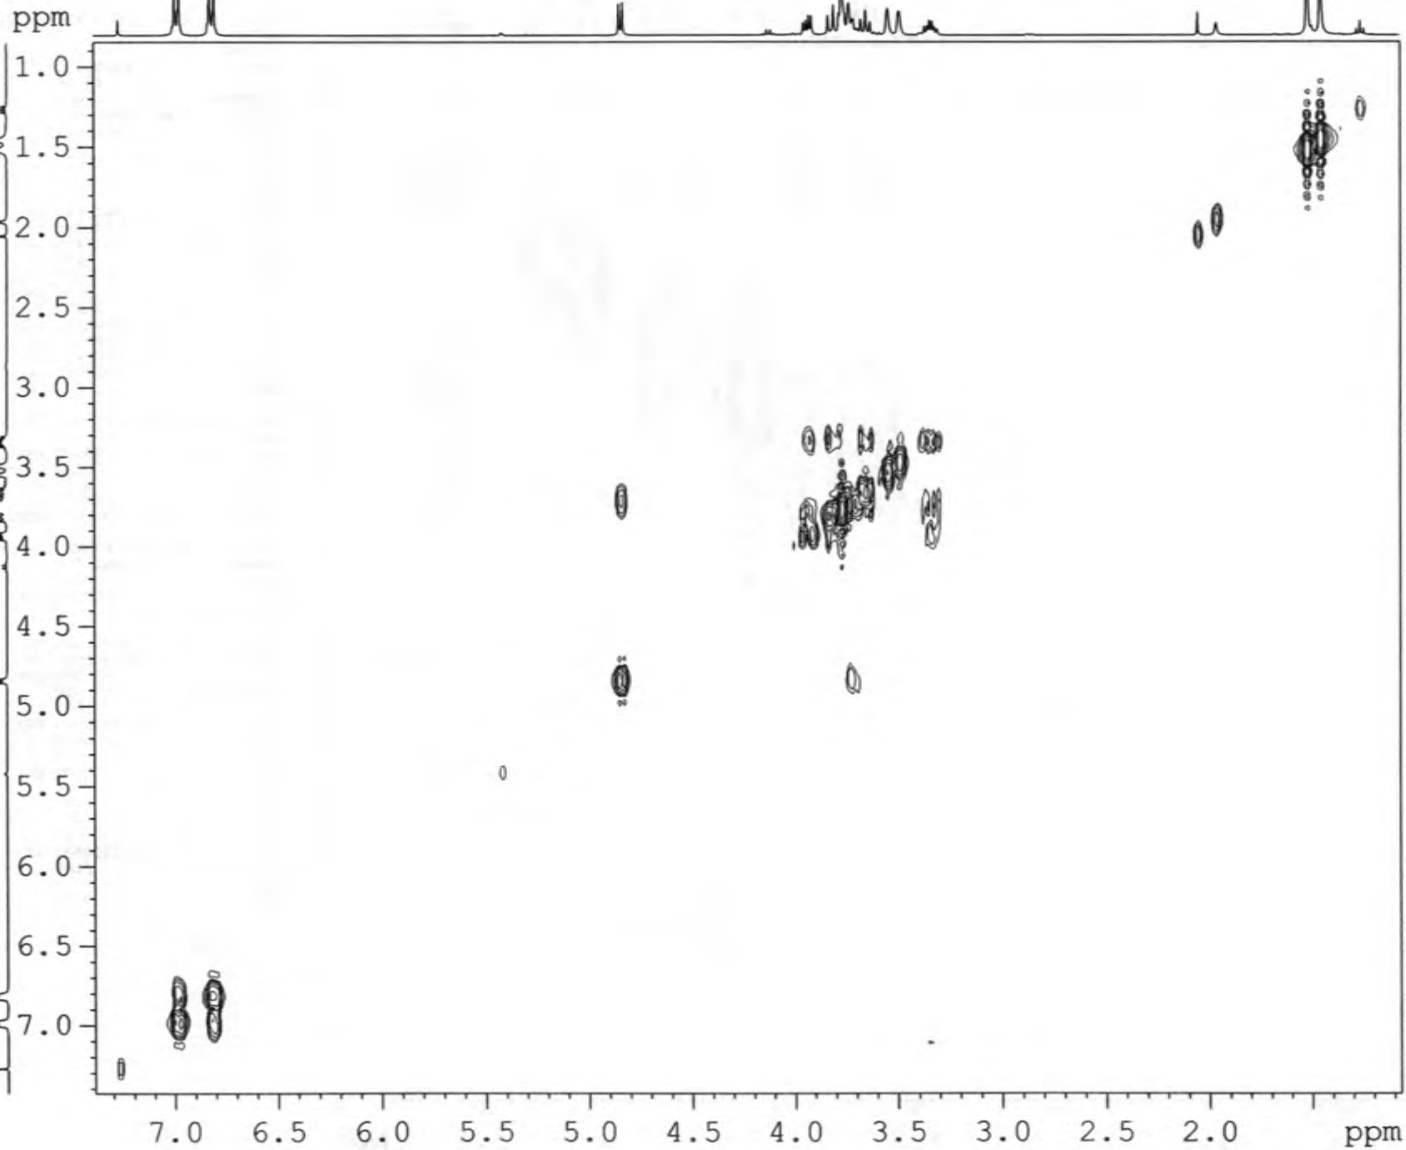

NAME ZGH-Ipom-1-126-A-130827  
 EXPNO 2  
 PROCNO 1  
 Date 20150313  
 Time 19.26  
 INSTRUM spect  
 PROBHD 5 mm PABBO BB-  
 PULPROG cosygpqf  
 TD 2048  
 SOLVENT CDC13  
 NS 4  
 DS 8  
 SWH 5341.880 Hz  
 FIDRES 2.608340 Hz  
 AQ 0.1917428 sec  
 RG 114  
 DW 93.600 usec  
 DE 6.50 usec  
 TE 292.7 K  
 D0 0.0000300 sec  
 D1 1.48689198 sec  
 D13 0.0000400 sec  
 D16 0.00020000 sec  
 INO 0.00018720 sec

----- CHANNEL f1 -----  
 NUC1 1H  
 P0 10.00 usec  
 P1 10.00 usec  
 PL1 -3.50 dB  
 PL1W 31.17620277 W  
 SFO1 400.1324057 MHz

----- GRADIENT CHANNEL -----  
 GPNAM1 SINE.100  
 GPZ1 10.00 %  
 P16 1000.00 usec  
 NDO 1  
 TD 91  
 SFO1 400.1324 MHz  
 FIDRES 58.701981 Hz  
 SW 13.350 ppm  
 FhMODE QF  
 SI 1024  
 SF 400.1300040 MHz  
 WDW SINE  
 SSB 0  
 LB 0.00 Hz  
 GB 0  
 PC 1.00  
 SI 1024  
 MC2 QF  
 SF 400.1300033 MHz  
 WDW SINE  
 SSB 0  
 LB 0.00 Hz  
 GB 0

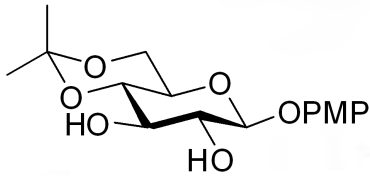

13

ZGH-*Ipom*-1-126-A-130827 HSQC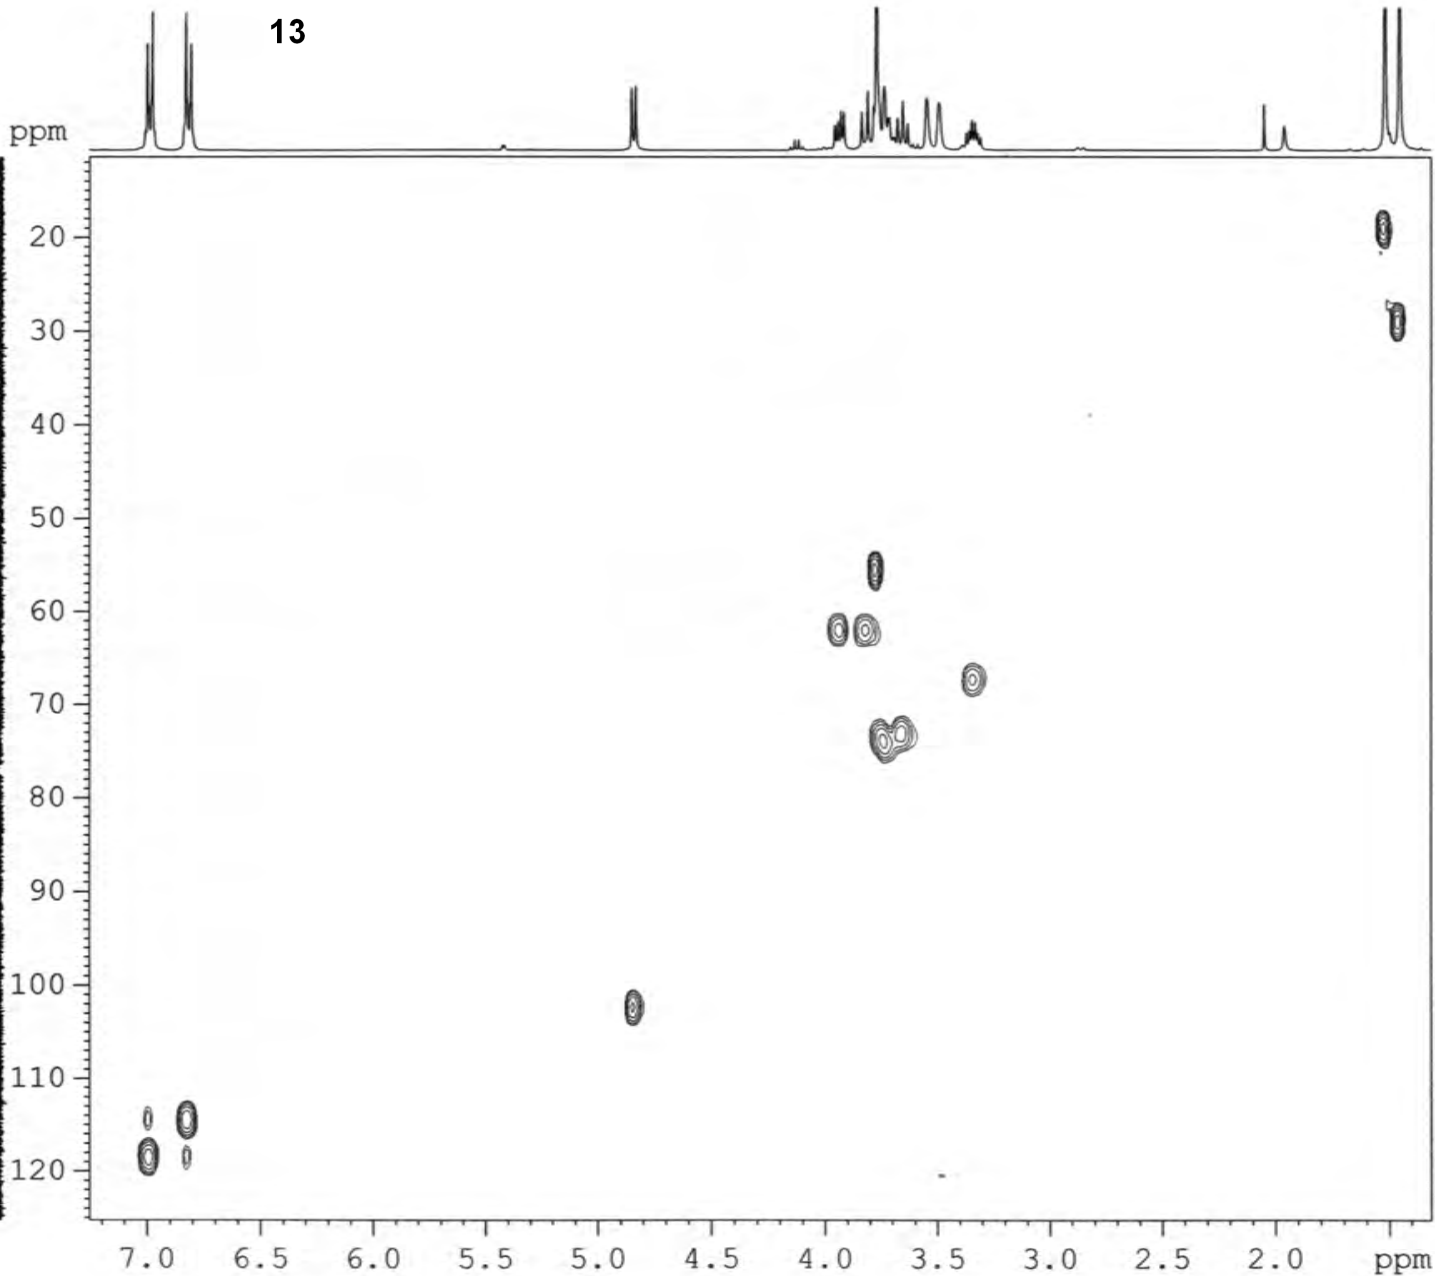

```

NAME      ZGH-Ipom-1-126-A-130827
EXPNO     4
PROCNO    1
Date_     20150313
Time      19.38
INSTRUM   spect
PROBHD    5 mm FAPBO BB-
PULPROG   hsqcetgps1
TD         1024
SOLVENT   CDCl3
NS         4
DS         16
SWH        5341.880 Hz
FIDRES     5.216680 Hz
AQ         0.0958964 sec
RG         2050
DW         93.600 usec
DE         6.50 usec
TE         292.5 K
CNST2     145.0000000
DO         0.00000300 sec
D1         1.50000000 sec
D4         0.00172414 sec
D11        0.03000000 sec
D13        0.00000400 sec
D16        0.00020000 sec
D24        0.00110000 sec
IN0        0.00003000 sec
ZGPTNS

```

```

===== CHANNEL f1 =====
NUC1      1H
P1        10.00 usec
P2        20.00 usec
P28       1000.00 usec
PL1       -3.50 dB
PL1W      31.17620277 W
SFO1      400.1324057 MHz

```

```

===== CHANNEL f2 =====
CPDPRG2   garp
NUC2      13C
P3        10.00 usec
P4        20.00 usec
PCPD2     75.00 usec
PL2       -2.10 dB
PL12      15.40 dB
PL2W      58.37759399 W
PL12W     1.03811681 W
SFO2      100.6202727 MHz

```

```

===== GRADIENT CHANNEL =====
GPNAM1    SINE.100
GPNAM2    SINE.100
GPZ1      80.00 %
GPZ2      20.10 %
P16       1000.00 usec
ND0       2
TD         75
SFO1      100.6203 MHz
FIDRES     222.222214 Hz
SW         165.639 ppm
FrMODE    Echo-Antiecho
SI         1024
SF         400.1300000 MHz
WDW        QSINE
SSB        2
LB         0.00 Hz
GB         0
PC         1.00
SI         1024
MC2       echo-antiecho
SF         100.6127690 MHz
WDW        QSINE
SSB        2
LB         0.00 Hz
GB         0

```

ZGH-Ipom-1-132-B-130831 in CDCl<sub>3</sub>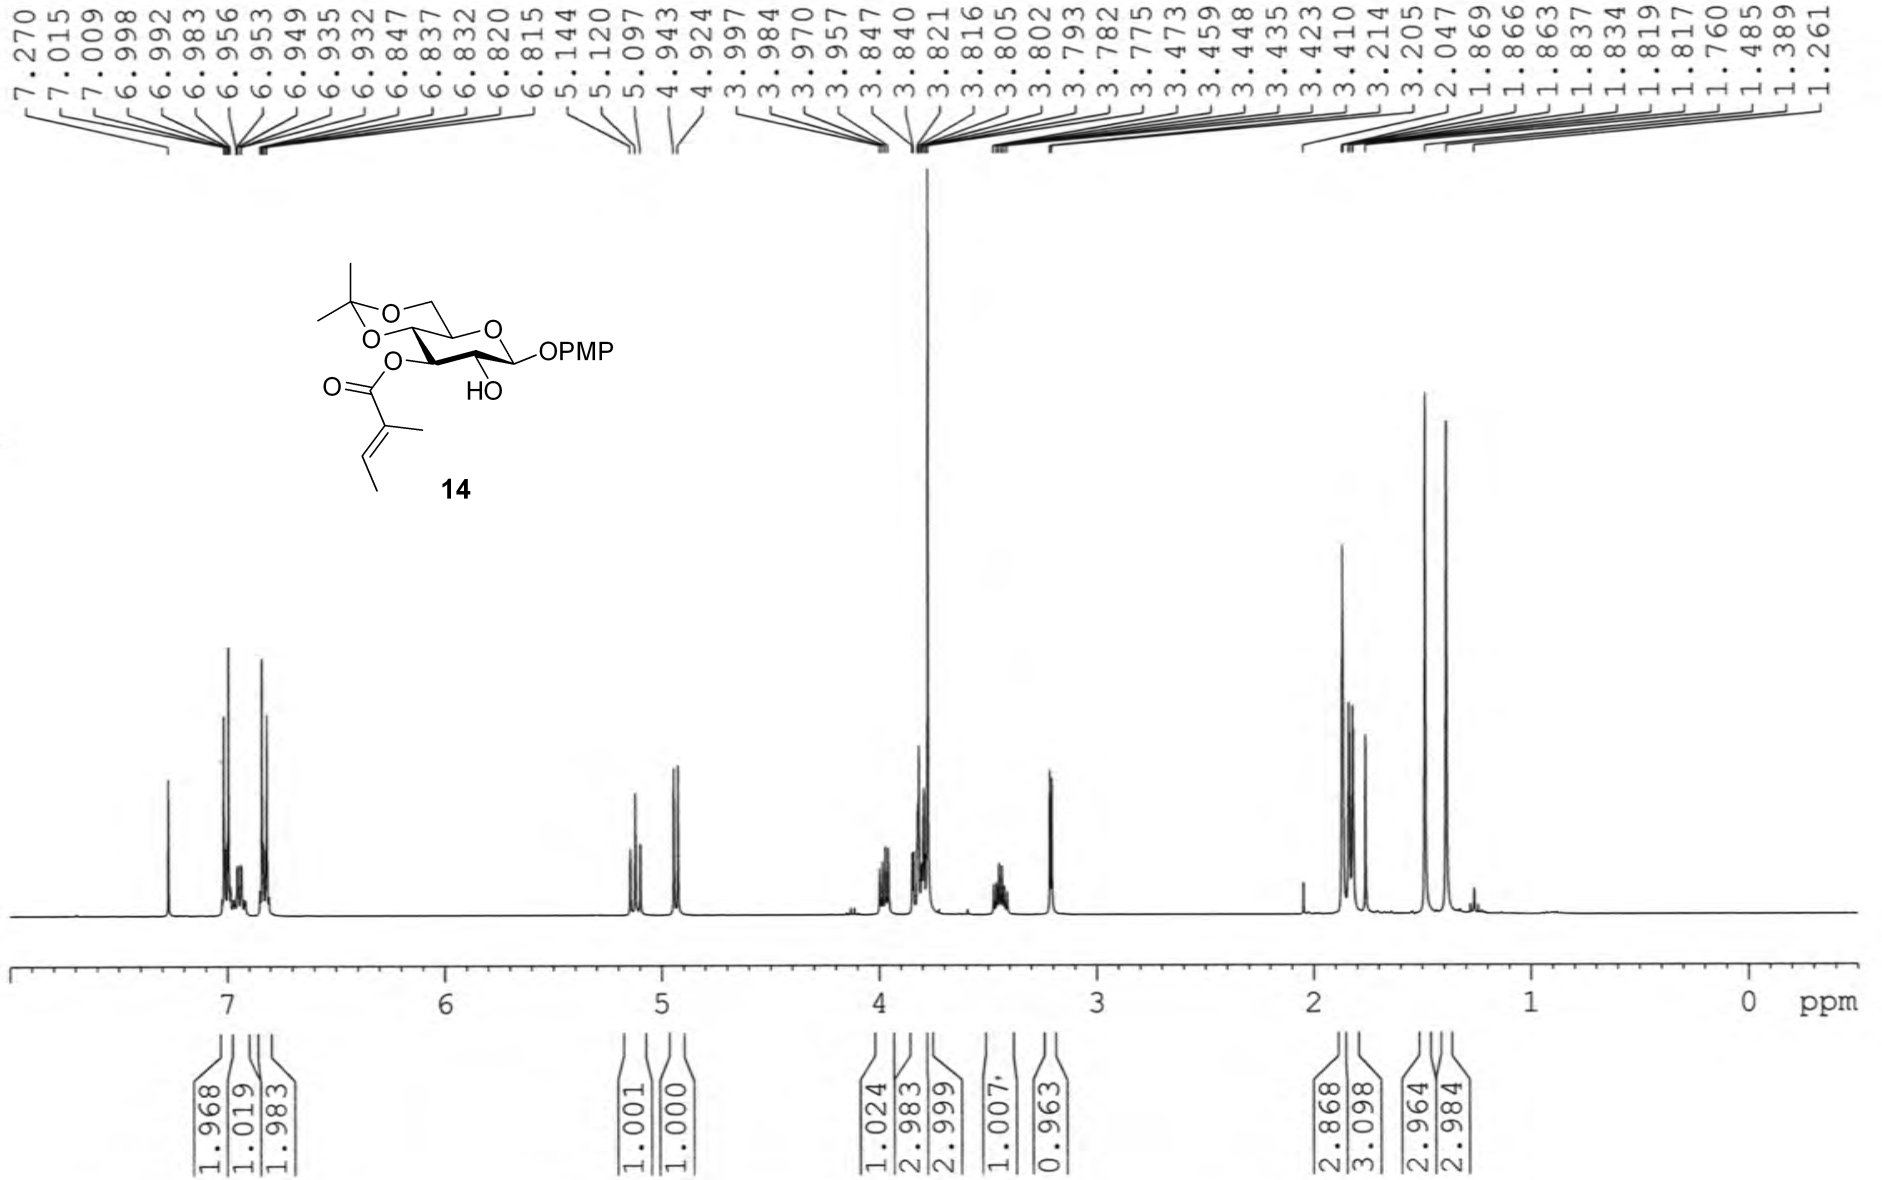



ZGH-*Ipom*-1-132-B-130831 <sup>13</sup>C in CDCl<sub>3</sub>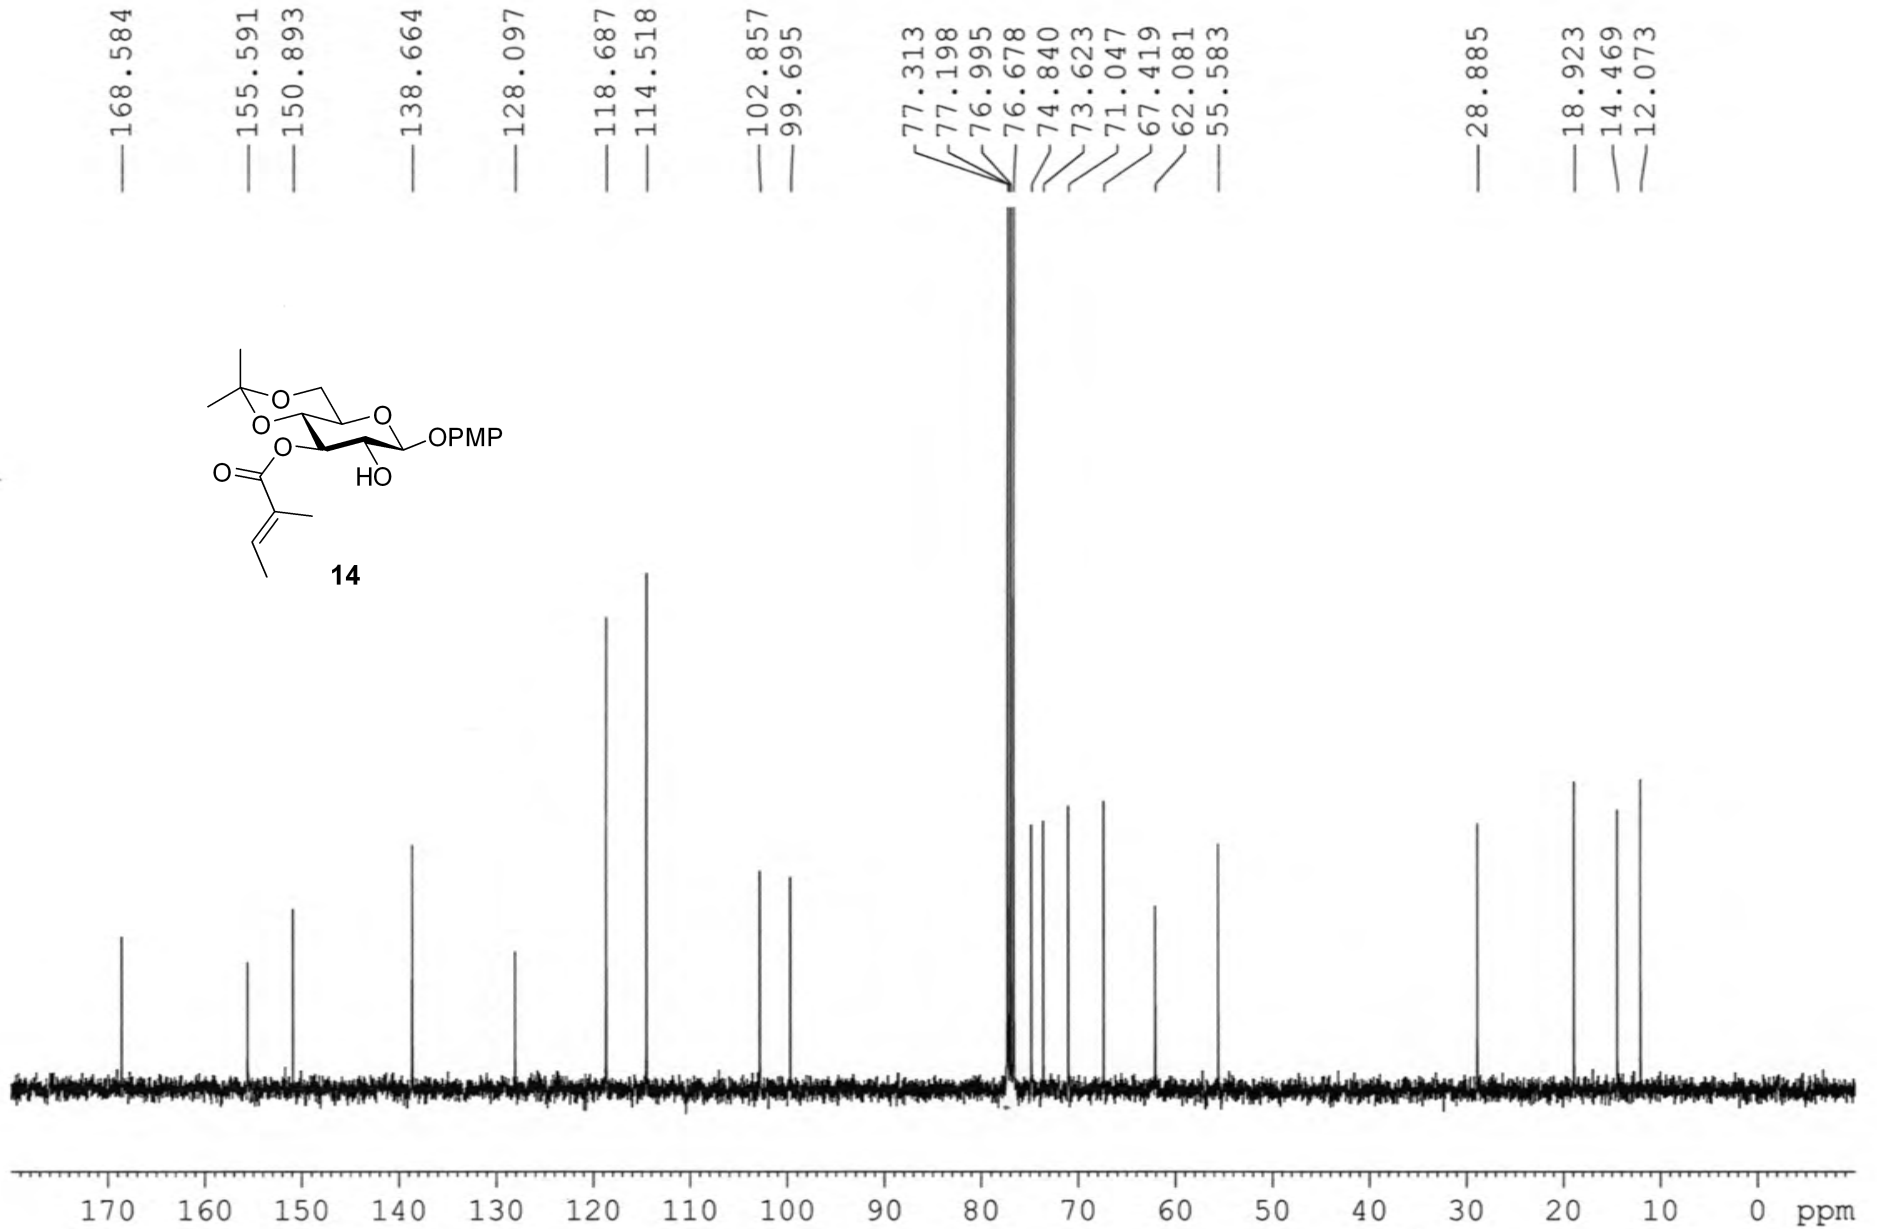

H-Ipom-1-132-B-130831 COSY

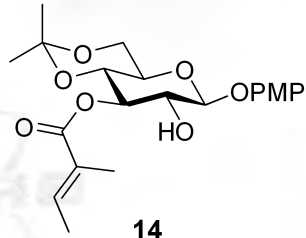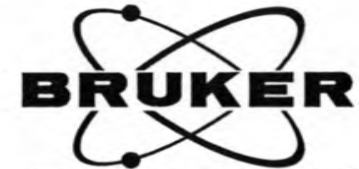

NAME ZGH-Ipom-1-132-B-130831  
 EXPNO 3  
 PROCNO 1  
 Date\_ 20130903  
 Time\_ 22.03  
 INSTRUM spect  
 PROBHD 5 mm PABBO BB-  
 PULPROG cosygpqf  
 TD 2048  
 SOLVENT CDC13  
 NS 2  
 DS 8  
 SWH 5341.880 Hz  
 FIDRES 2.608340 Hz  
 AQ 0.1917428 sec  
 RG 90.5  
 DW 93.600 usec  
 DE 6.50 usec  
 TE 293.8 K  
 D0 0.00000300 sec  
 D1 1.48689198 sec  
 D13 0.00000400 sec  
 D16 0.00020000 sec  
 IN0 0.00018720 sec

===== CHANNEL f1 =====  
 NUC1 1H  
 P0 10.00 usec  
 P1 10.00 usec  
 PL1 -3.50 dB  
 PL1W 31.17620277 W  
 SF01 400.1324057 MHz

===== GRADIENT CHANNEL =====  
 GPNAM1 SINE.100  
 GPZ1 10.00 %  
 P16 1000.00 usec  
 ND0 1  
 TD 128  
 SF01 400.1324 MHz  
 FIDRES 41.733440 Hz  
 SW 13.350 ppm  
 FnmODE QF  
 SI 1024  
 SF 400.1300040 MHz  
 WDW SINE  
 SSB 0  
 LB 0.00 Hz  
 GB 0  
 PC 1.00  
 SI 1024  
 MC2 QF  
 SF 400.1300033 MHz  
 WDW SINE  
 SSB 0  
 LB 0.00 Hz  
 GB 0

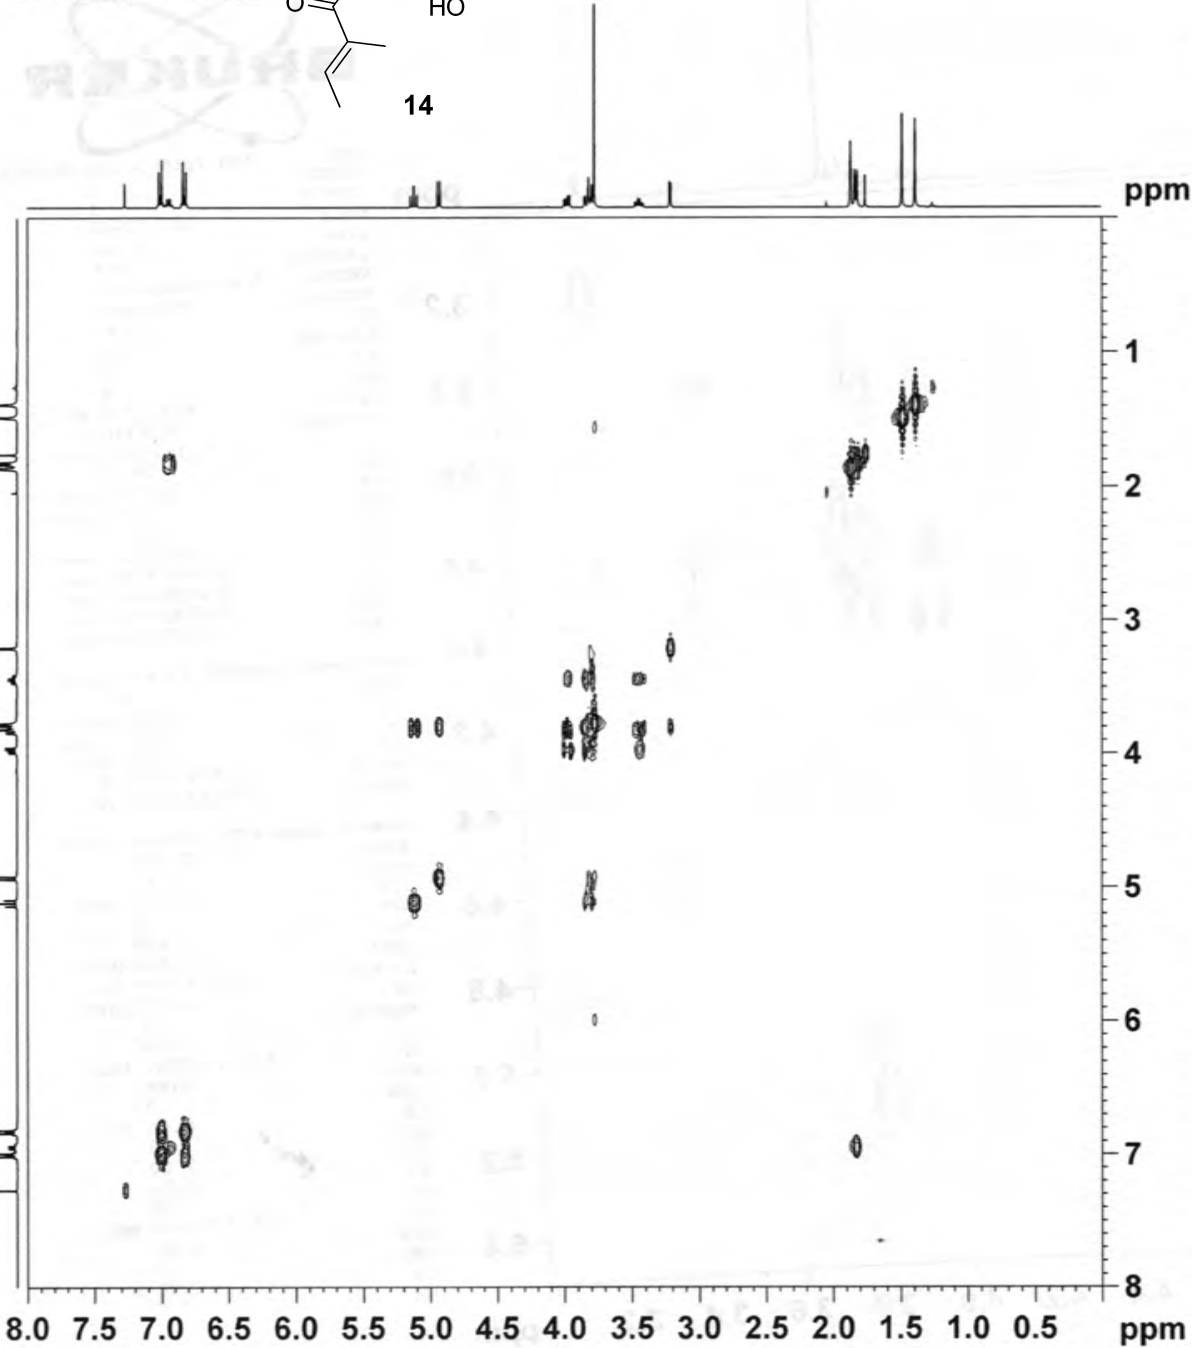

ZGH-*Ipom*-1-132-A-130831 in CDC13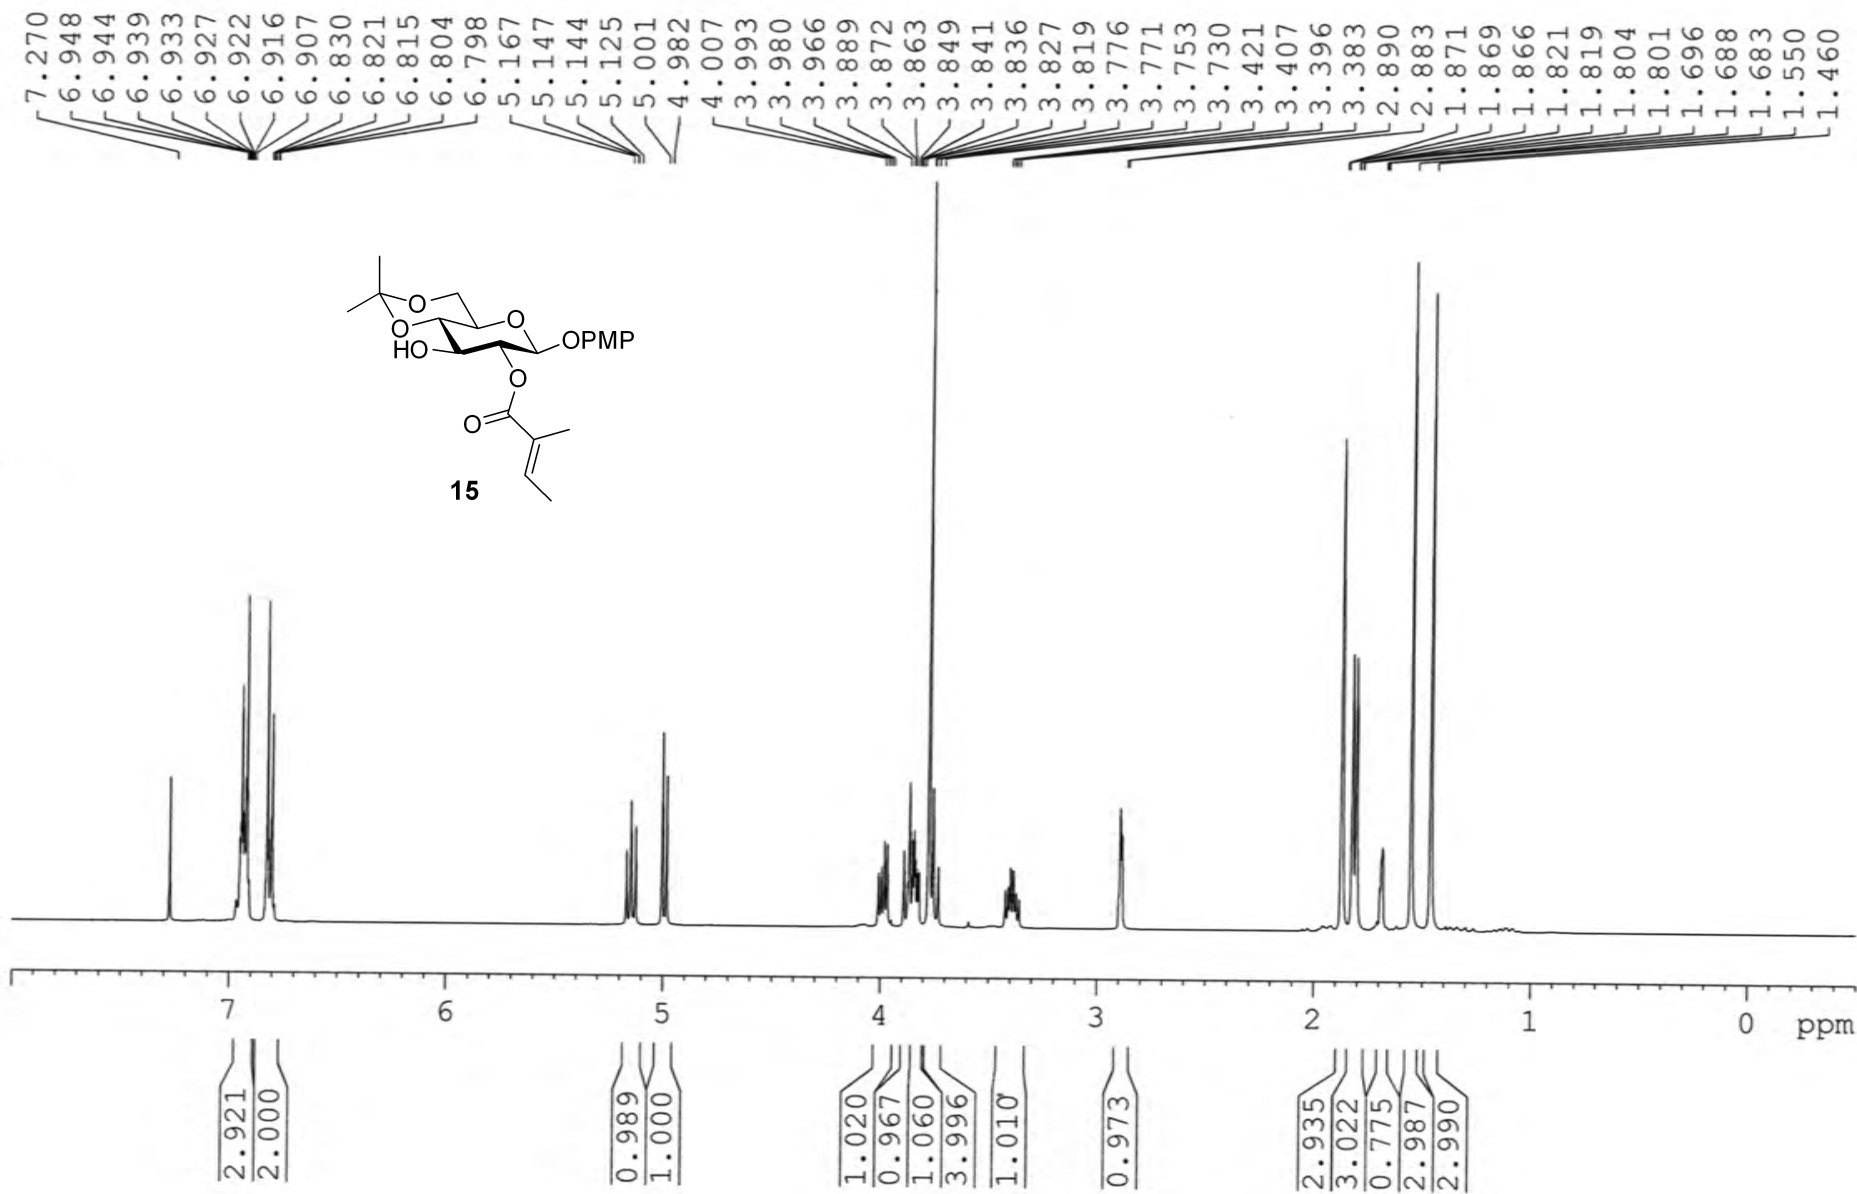

ZGH-Ipom-1-132-A-130831 13C in CDC13

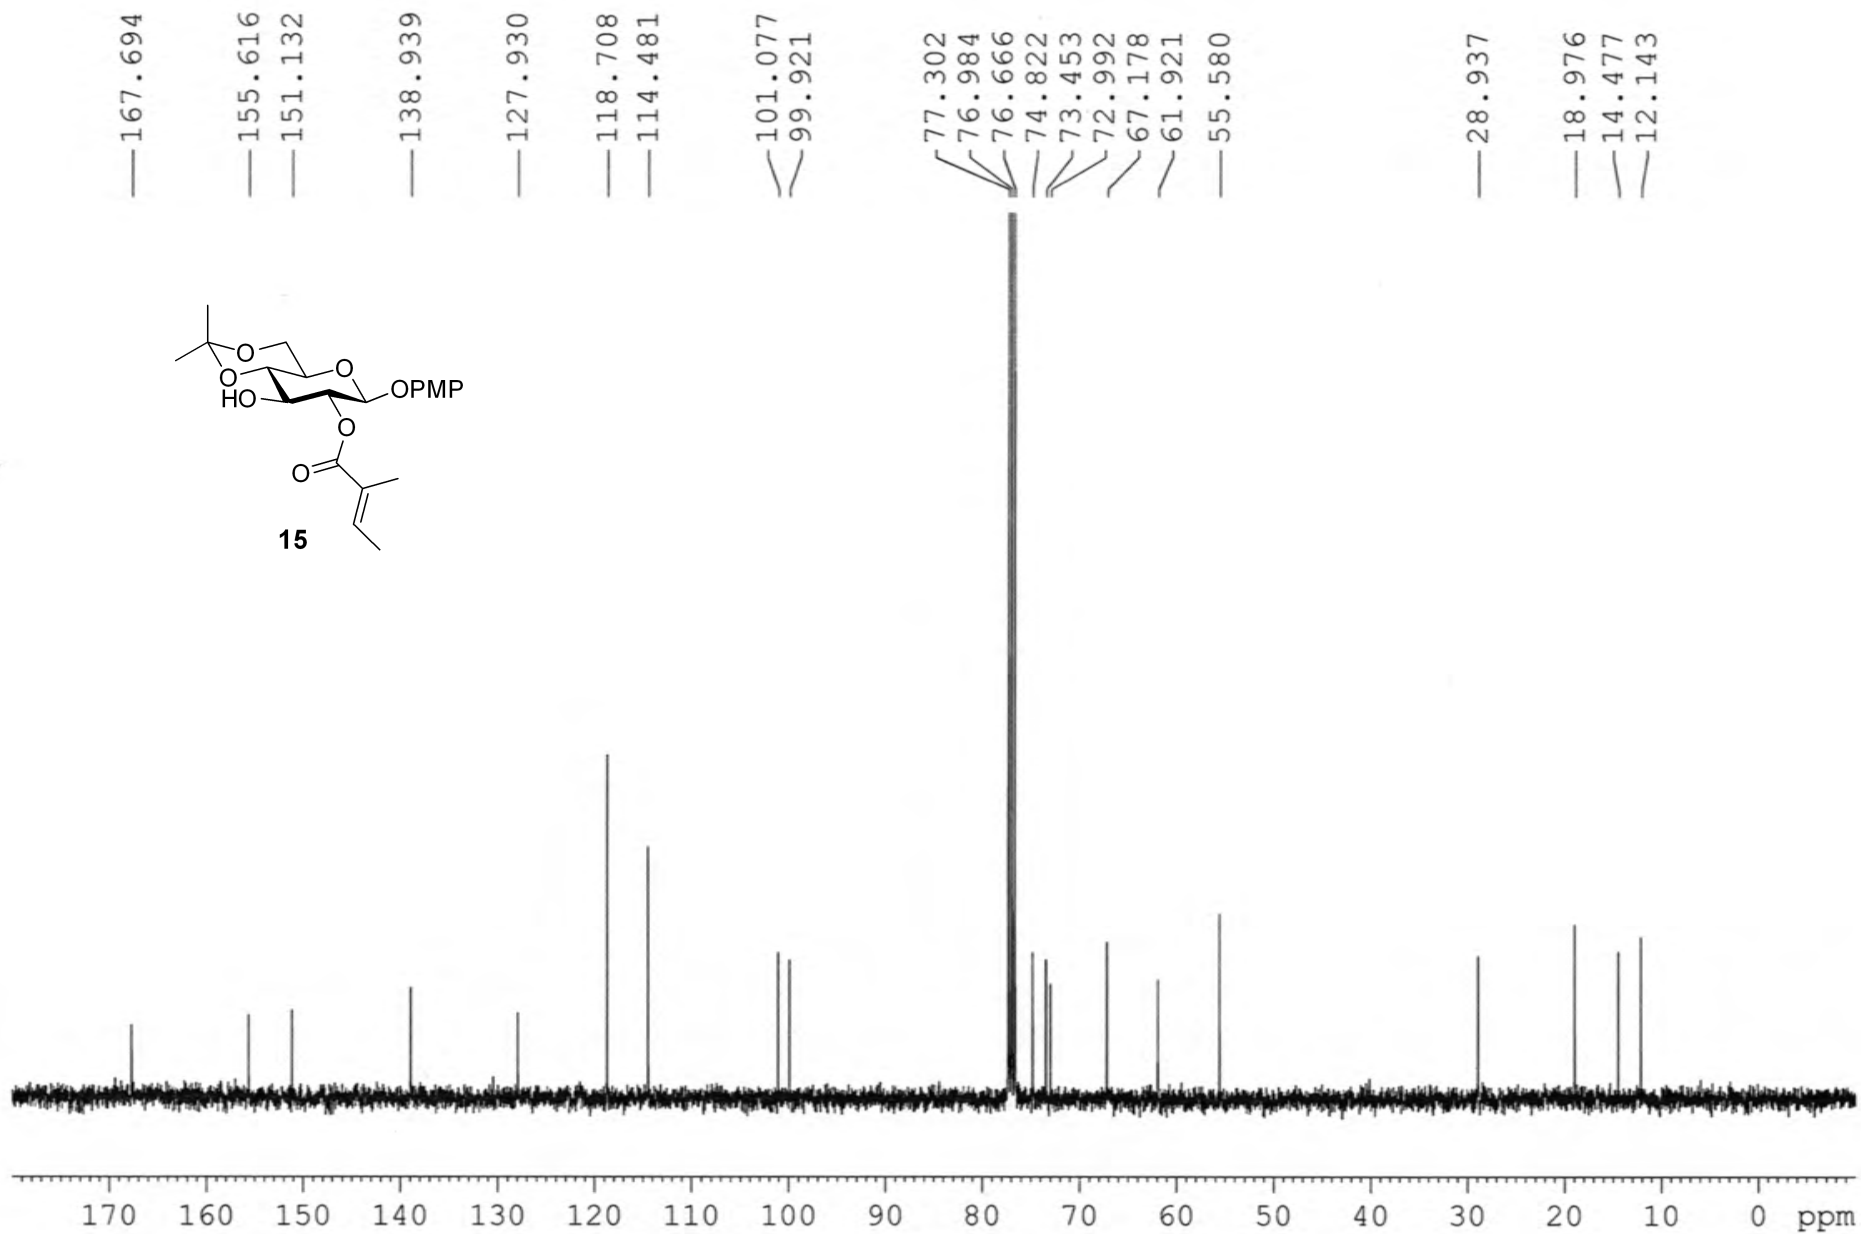

ZGH-Ipom-1-132-A-130831

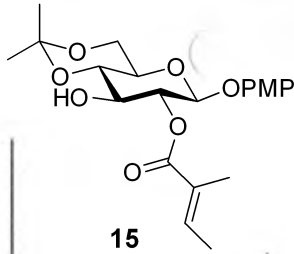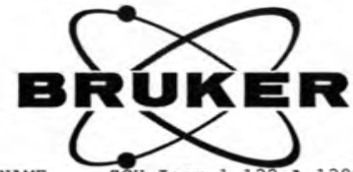

NAME ZGH-Ipom-1-132-A-130831  
 EXPNO 2  
 PROCNO 1  
 Date\_ 20130903  
 Time 20.31  
 INSTRUM spect  
 PROBHD 5 mm PABBO BB-  
 PULPROG cosygppqf  
 TD 2048  
 SOLVENT CDC13  
 NS 2  
 DS 8  
 SWH 5341.880 Hz  
 FIDRES 2.608340 Hz  
 AQ 0.1917428 sec  
 RG 144  
 DW 93.600 usec  
 DE 6.50 usec  
 TE 293.5 K  
 D0 0.00000300 sec  
 D1 1.48689198 sec  
 D13 0.00000400 sec  
 D16 0.00020000 sec  
 IN0 0.00018720 sec

==== CHANNEL f1 =====  
 NUC1 1H  
 P0 10.00 usec  
 P1 10.00 usec  
 PL1 -3.50 dB  
 PL1W 31.17620277 W  
 SFO1 400.1324057 MHz

===== GRADIENT CHANNEL =====  
 GPNAM1 SINE.100  
 GP21 10.00 %  
 P16 1000.00 usec  
 NDO 1  
 TD 128  
 SFO1 400.1324 MHz  
 FIDRES 41.733440 Hz  
 SW 13.350 ppm  
 FnmODE QF  
 SI 1024  
 SF 400.1300040 MHz  
 WDW SINE  
 SSB 0  
 LB 0.00 Hz  
 GB 0  
 PC 1.00  
 SI 1024  
 MC2 QF  
 SF 400.1300033 MHz  
 WDW SINE  
 SSB 0  
 LB 0.00 Hz  
 GB 0

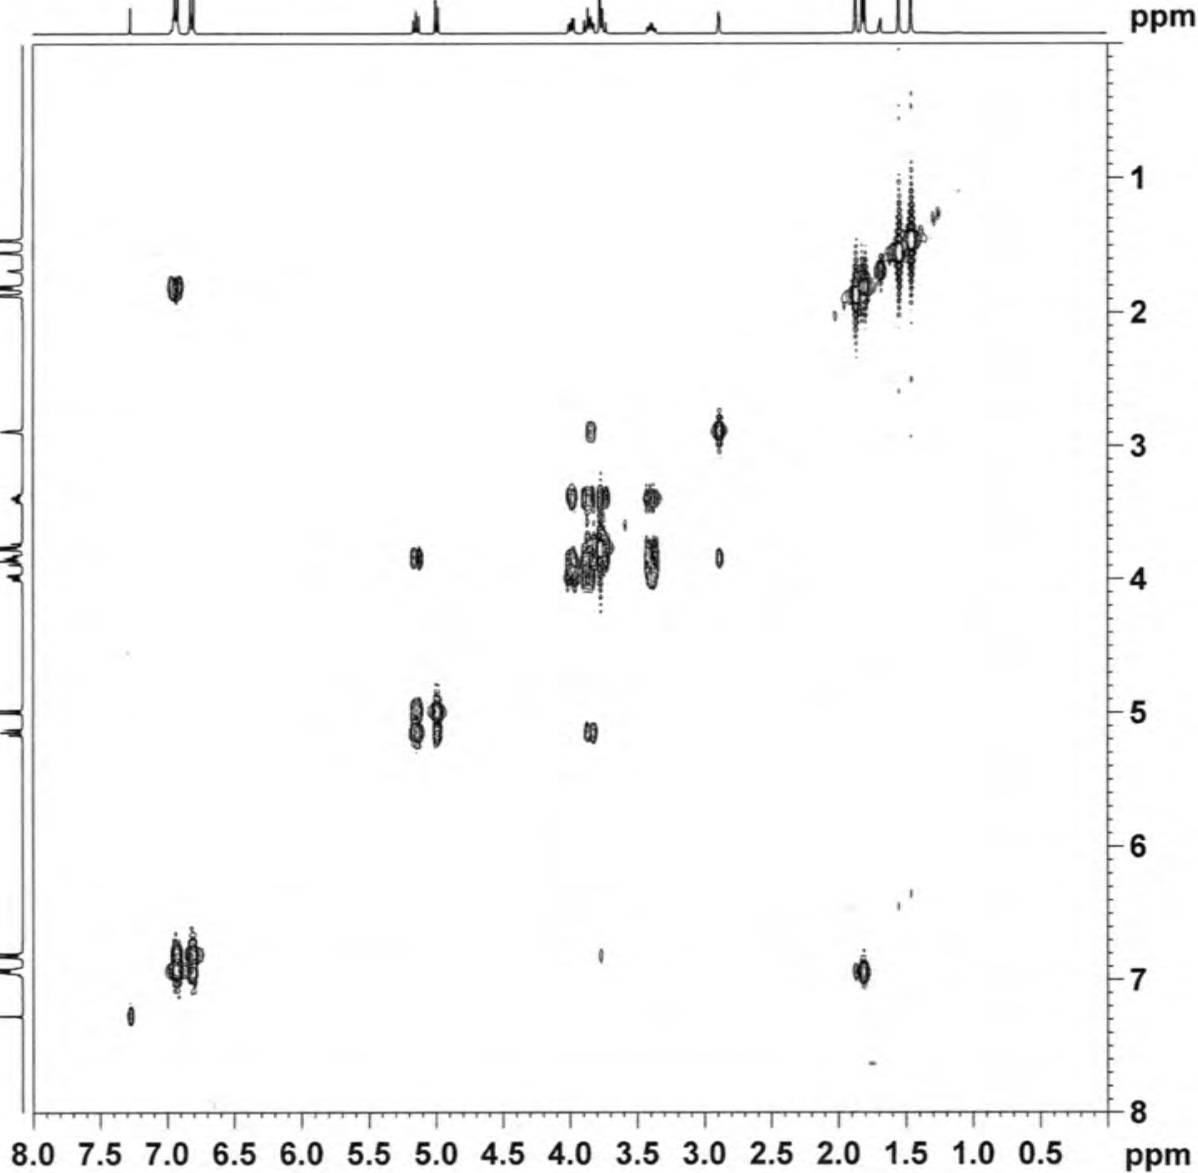

## ZGH-Ipom-1-132-C-130831 in CDC13

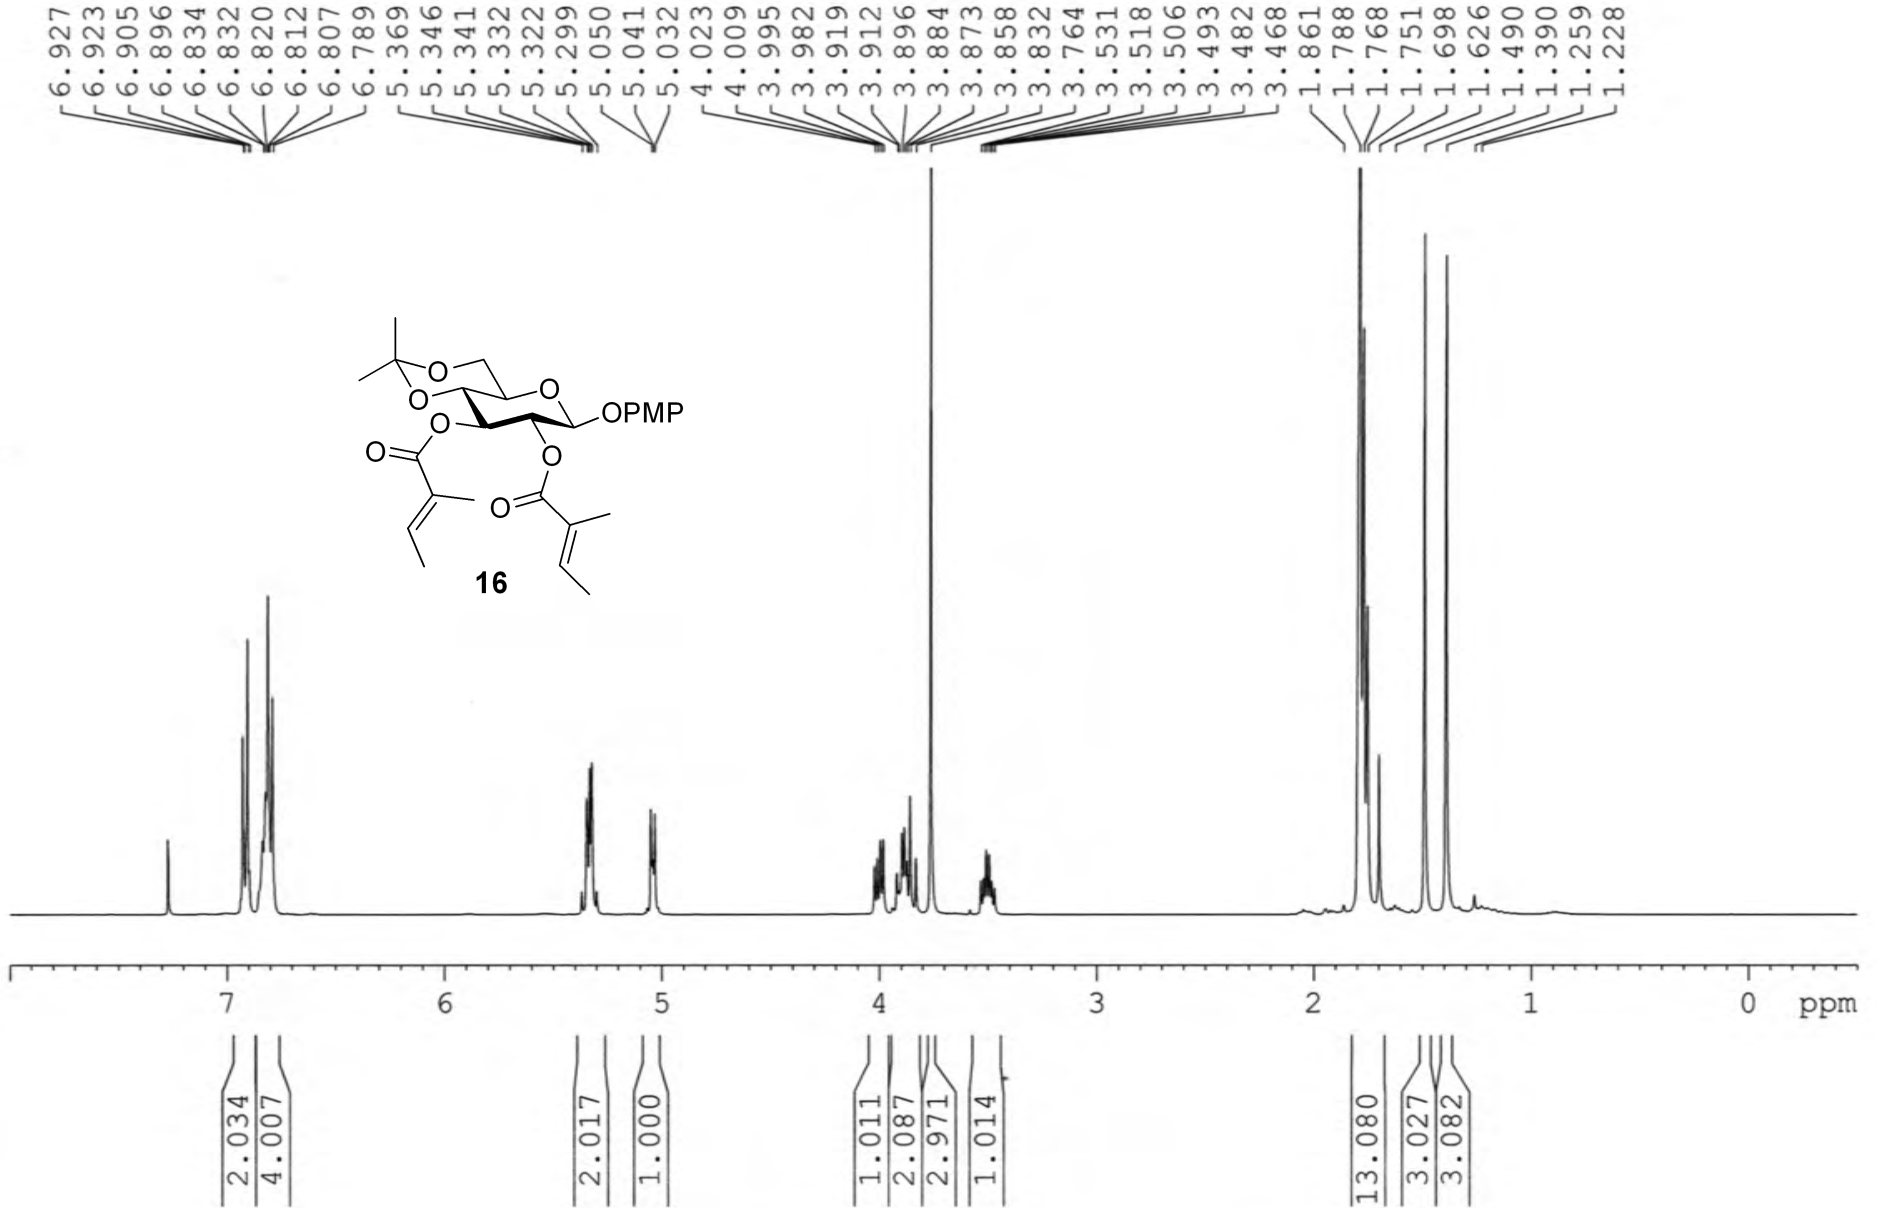

ZGH-*Ipom*-1-132-C-130831 <sup>13</sup>C in CDCl<sub>3</sub>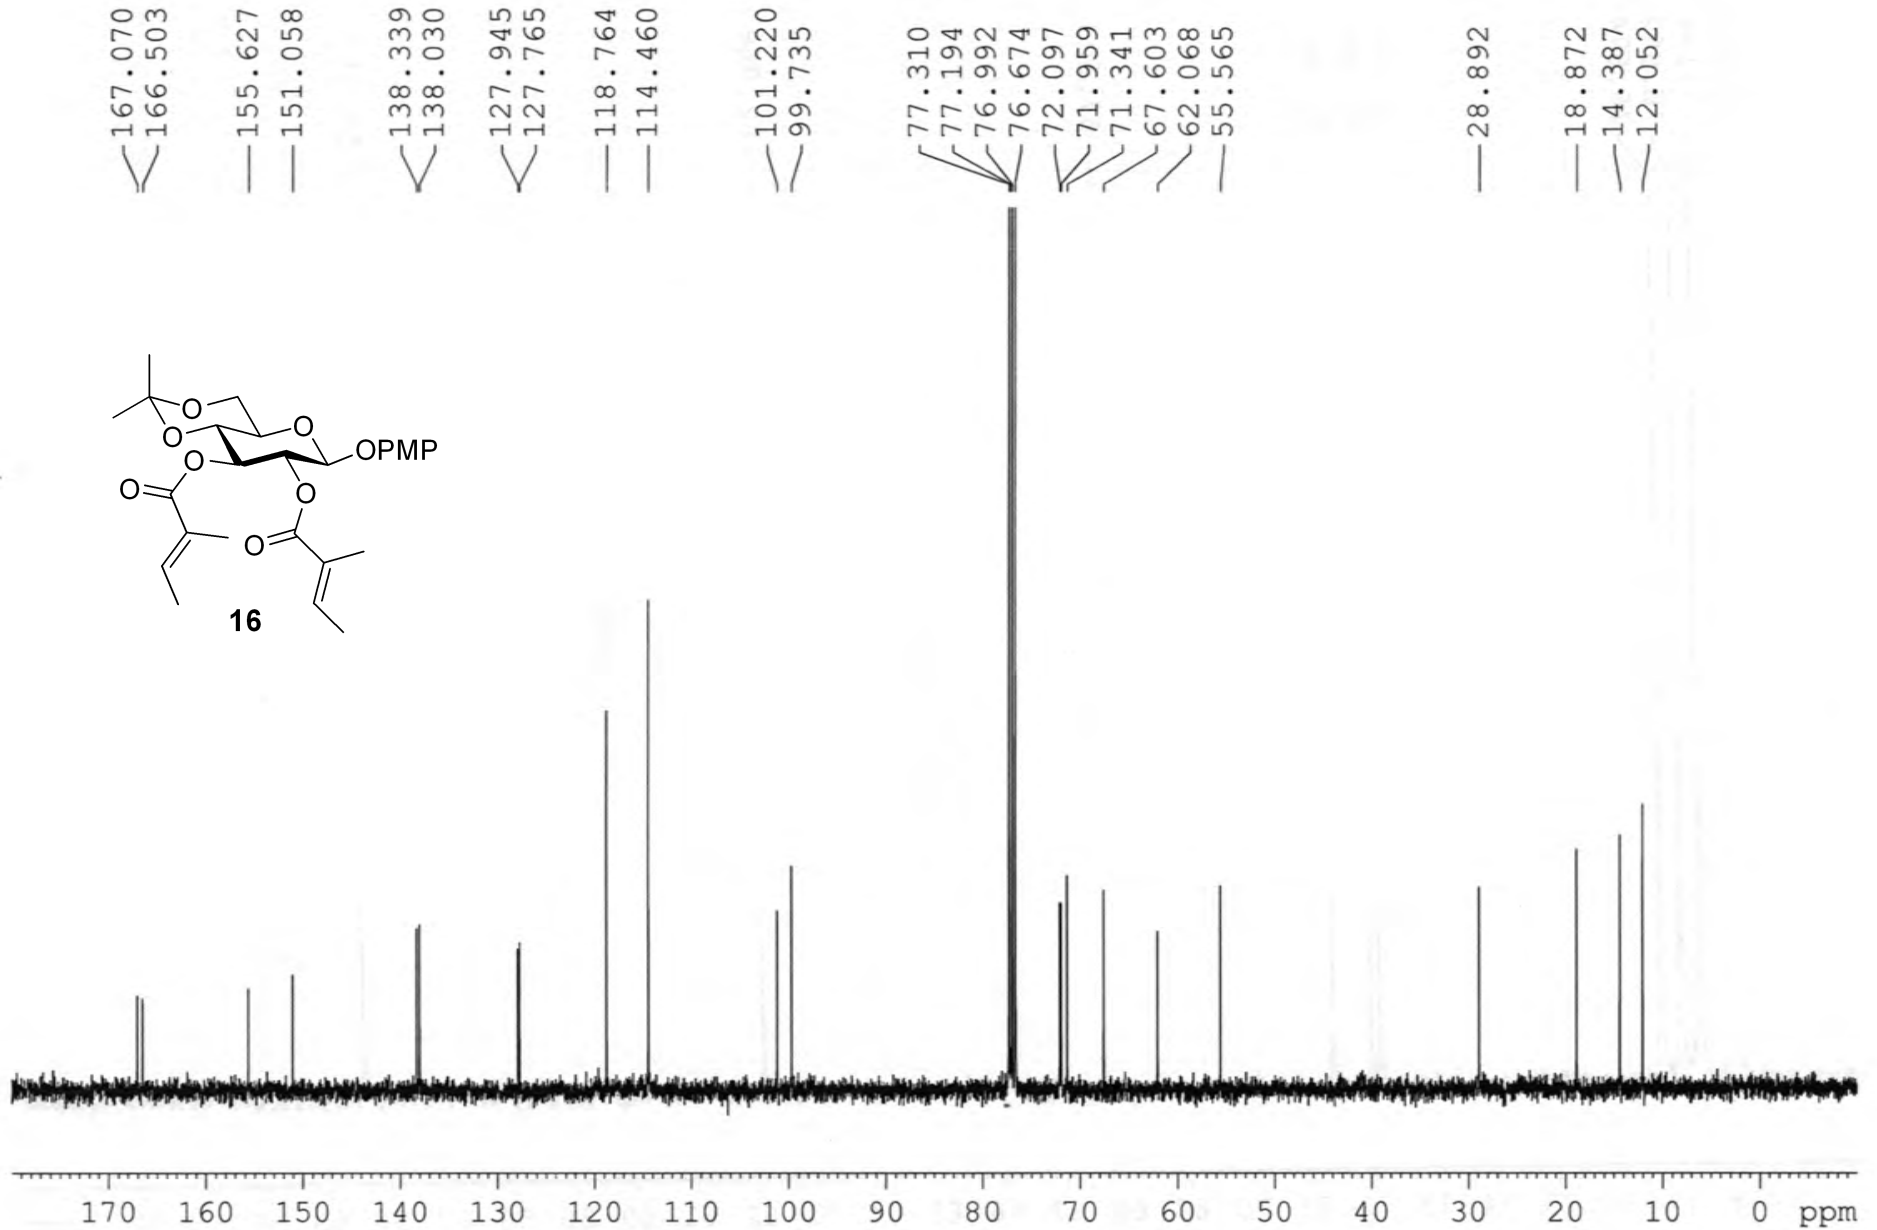

ZGH-*Ipom*-1-126-B-130827 1H in CDCL<sub>3</sub>

7.275  
7.270  
7.003  
6.985  
6.980  
6.971  
6.830  
6.811  
6.807  
6.799

5.414  
5.405  
4.031  
4.026  
4.008  
4.003  
3.985  
3.980  
3.866  
3.853  
3.833  
3.815  
3.803  
3.769  
3.759  
3.747  
3.737  
3.728  
3.714  
3.699  
3.632  
3.610  
3.587  
3.444  
3.425  
2.994  
2.971  
2.951  
2.045  
2.026  
1.522  
1.444  
1.277  
1.259  
1.241

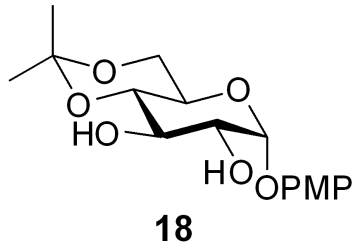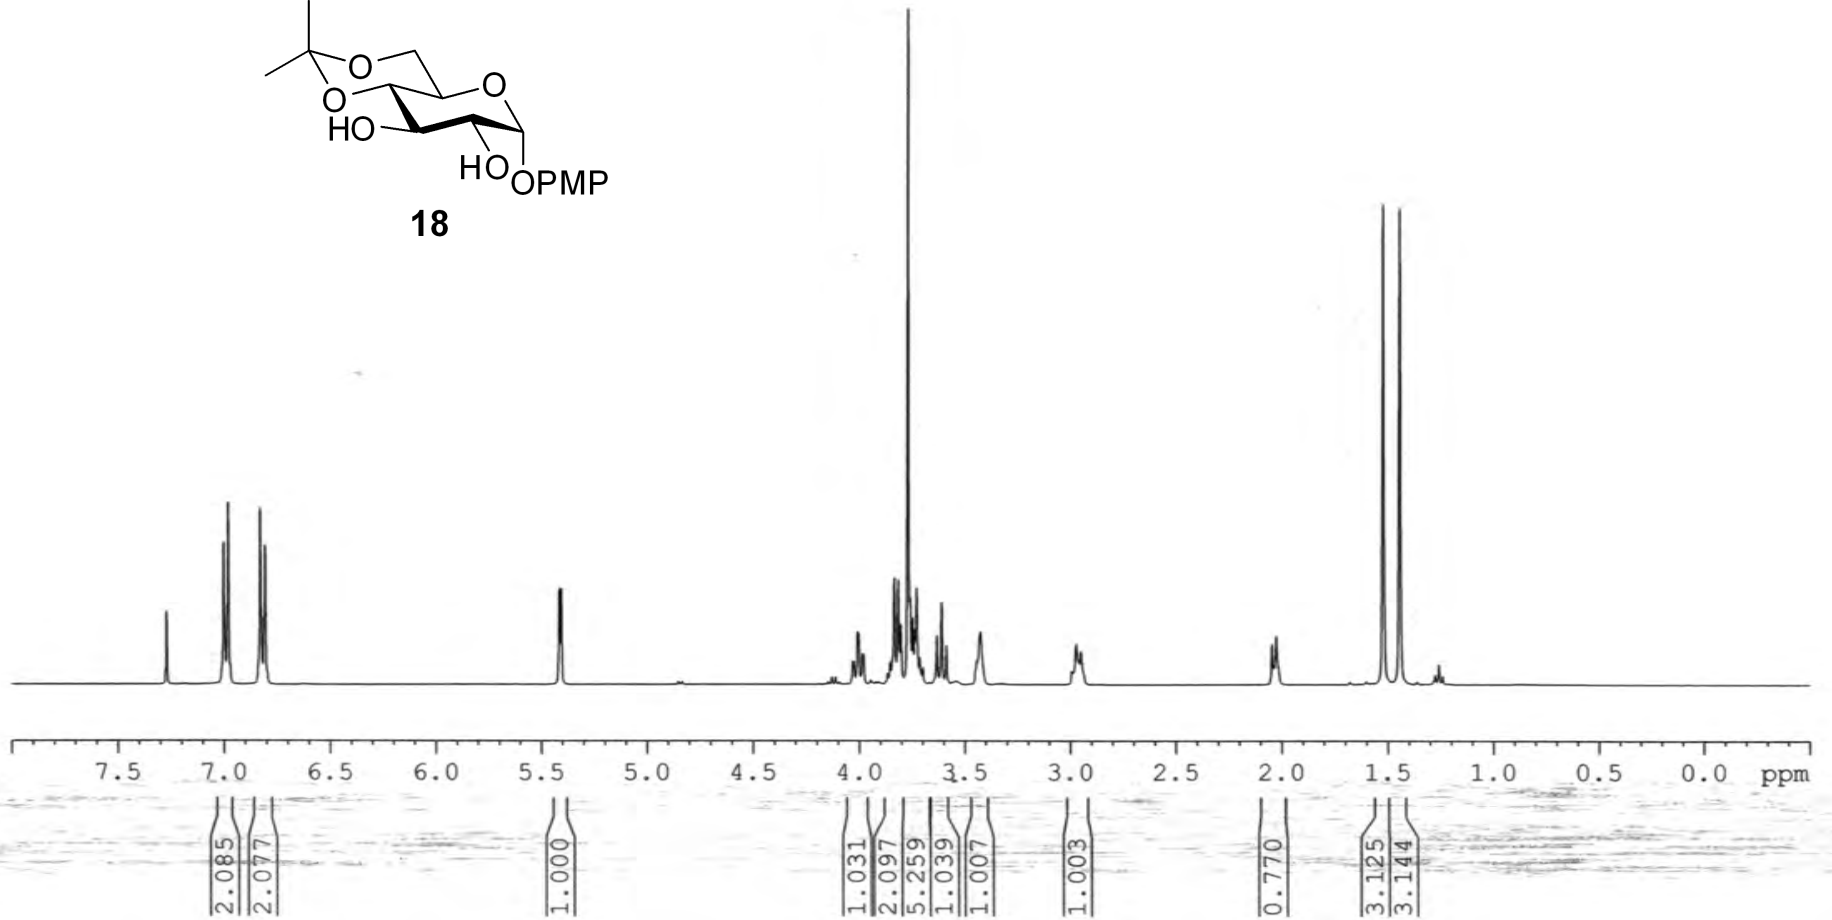



ZGH-*Ipom*-1-126-B-130827  $^{13}\text{C}$  in  $\text{CDCl}_3$ 

— 155.418  
— 150.180

— 118.406  
— 114.638

— 99.803  
— 98.619

77.319  
77.201  
77.001  
76.683  
73.430  
72.806  
71.845  
63.990  
62.129  
— 55.589

— 28.999

— 19.075

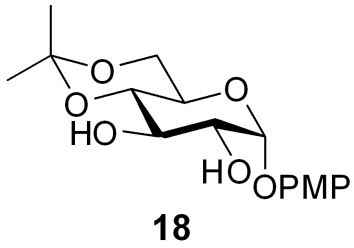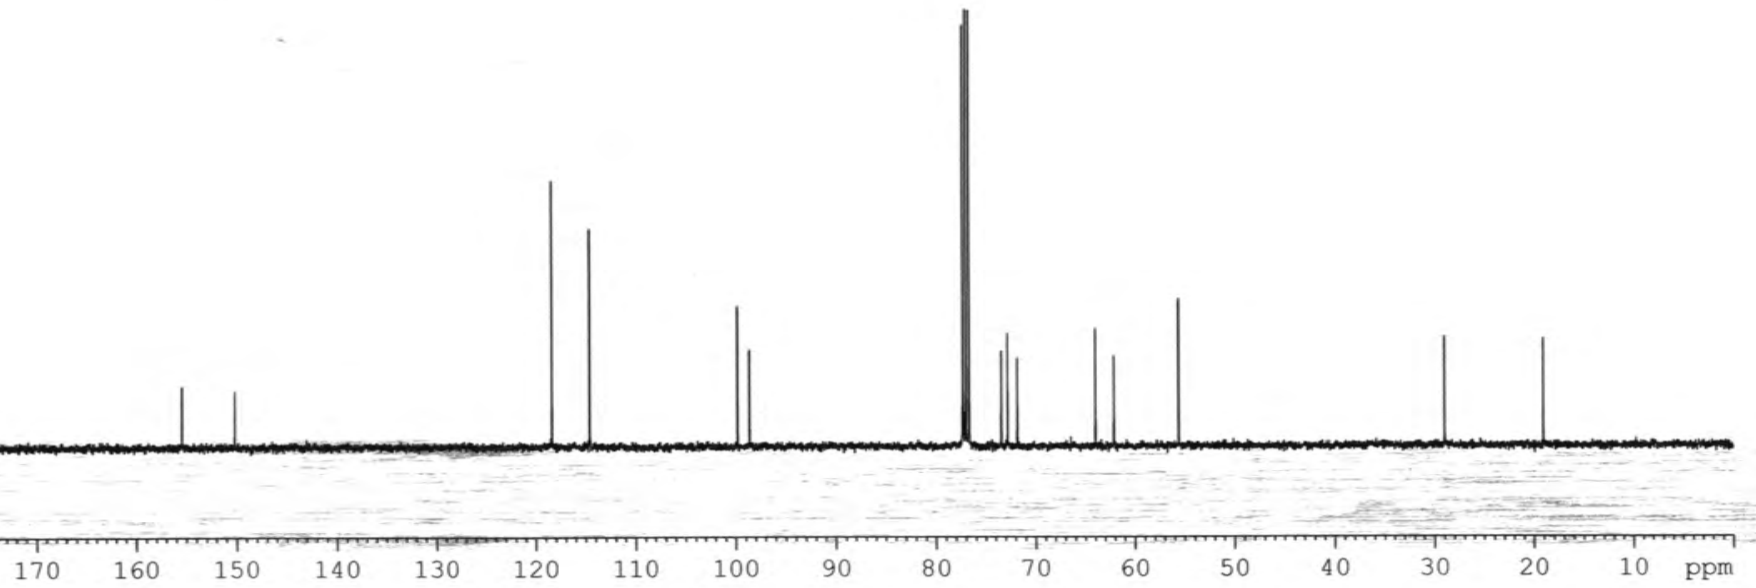

ZGH-*Ipom*-1-152-A-131001 1H in CDCL<sub>3</sub>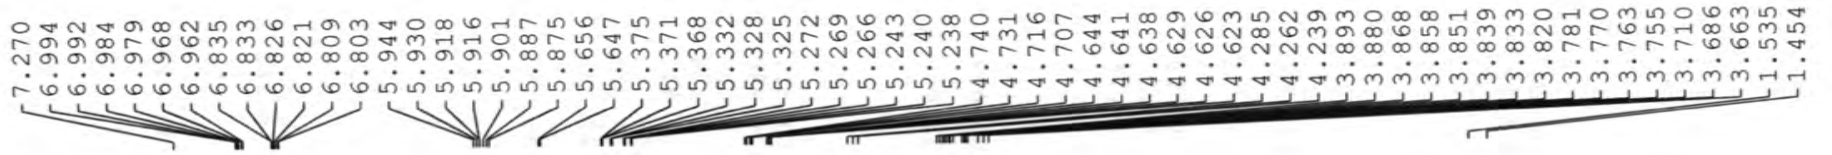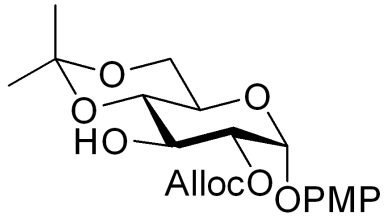**19**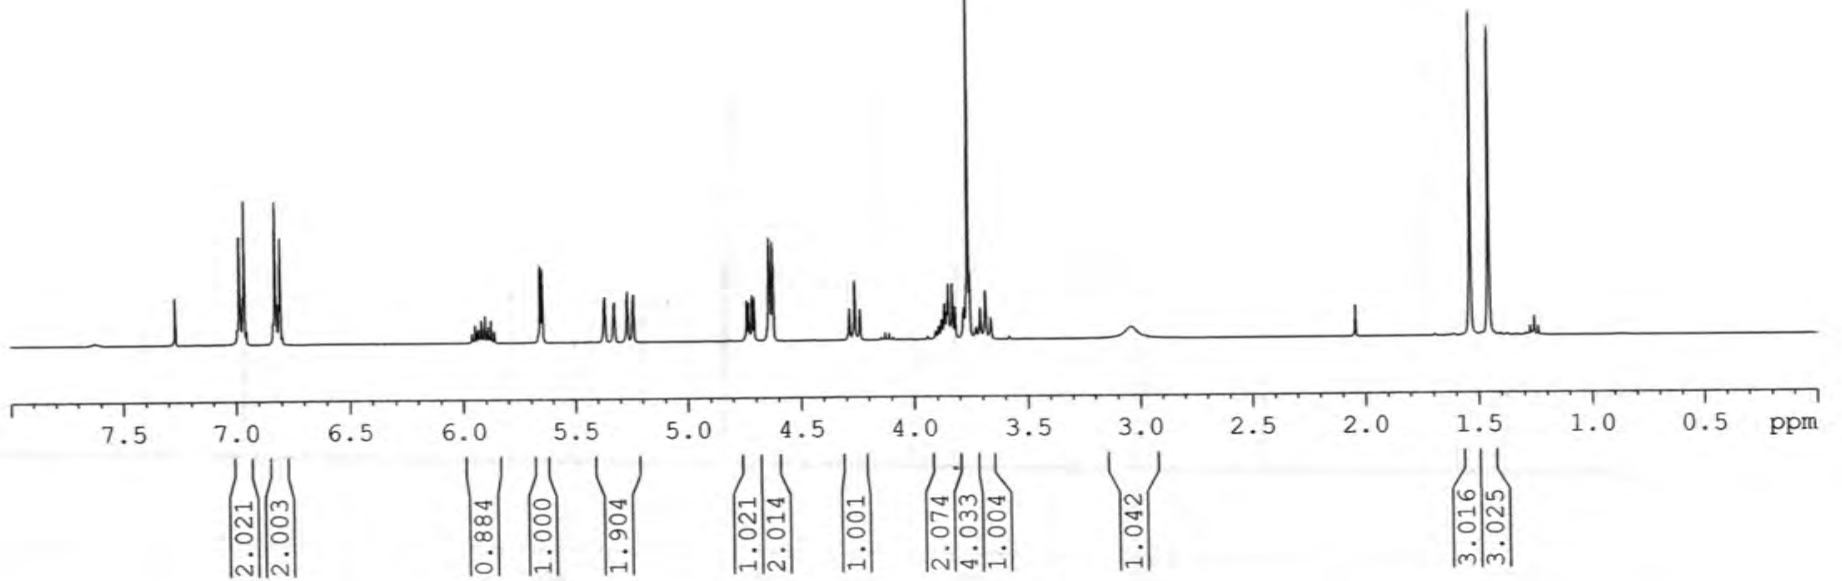

ZGH-Ipom-1-152-A-131001  $^{13}\text{C}$  in  $\text{CDCl}_3$ 155.280  
154.433  
150.253

131.072

119.197  
118.161  
114.54499.973  
95.83677.317  
76.999  
76.680  
73.674  
68.913  
68.763  
63.662  
62.043  
55.563

28.923

19.046

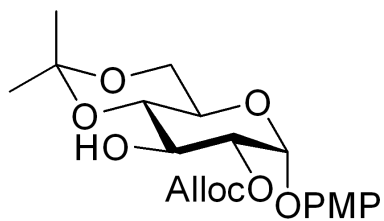**19**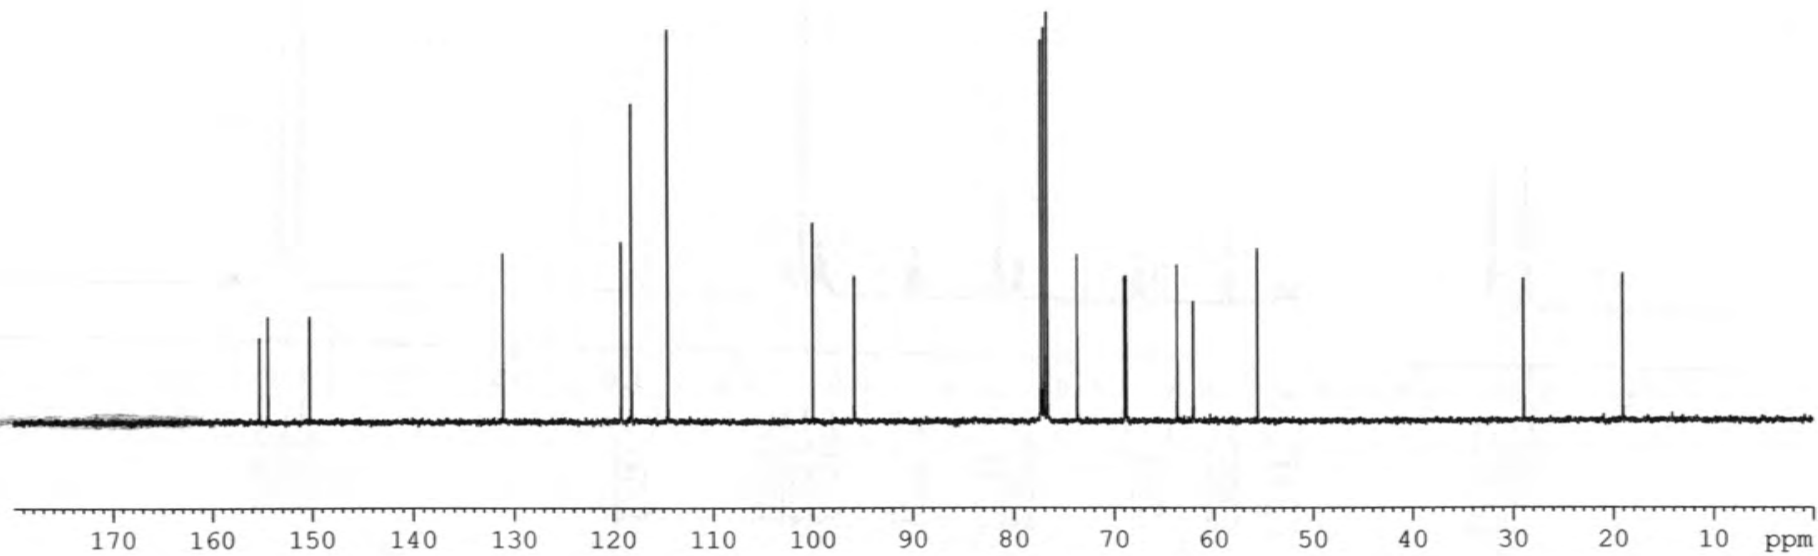

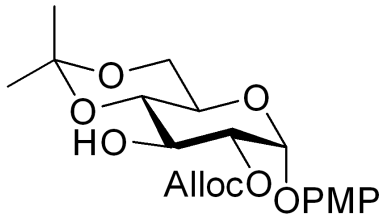

19

ZGH-Ipom-1-152-A-131001 COSY

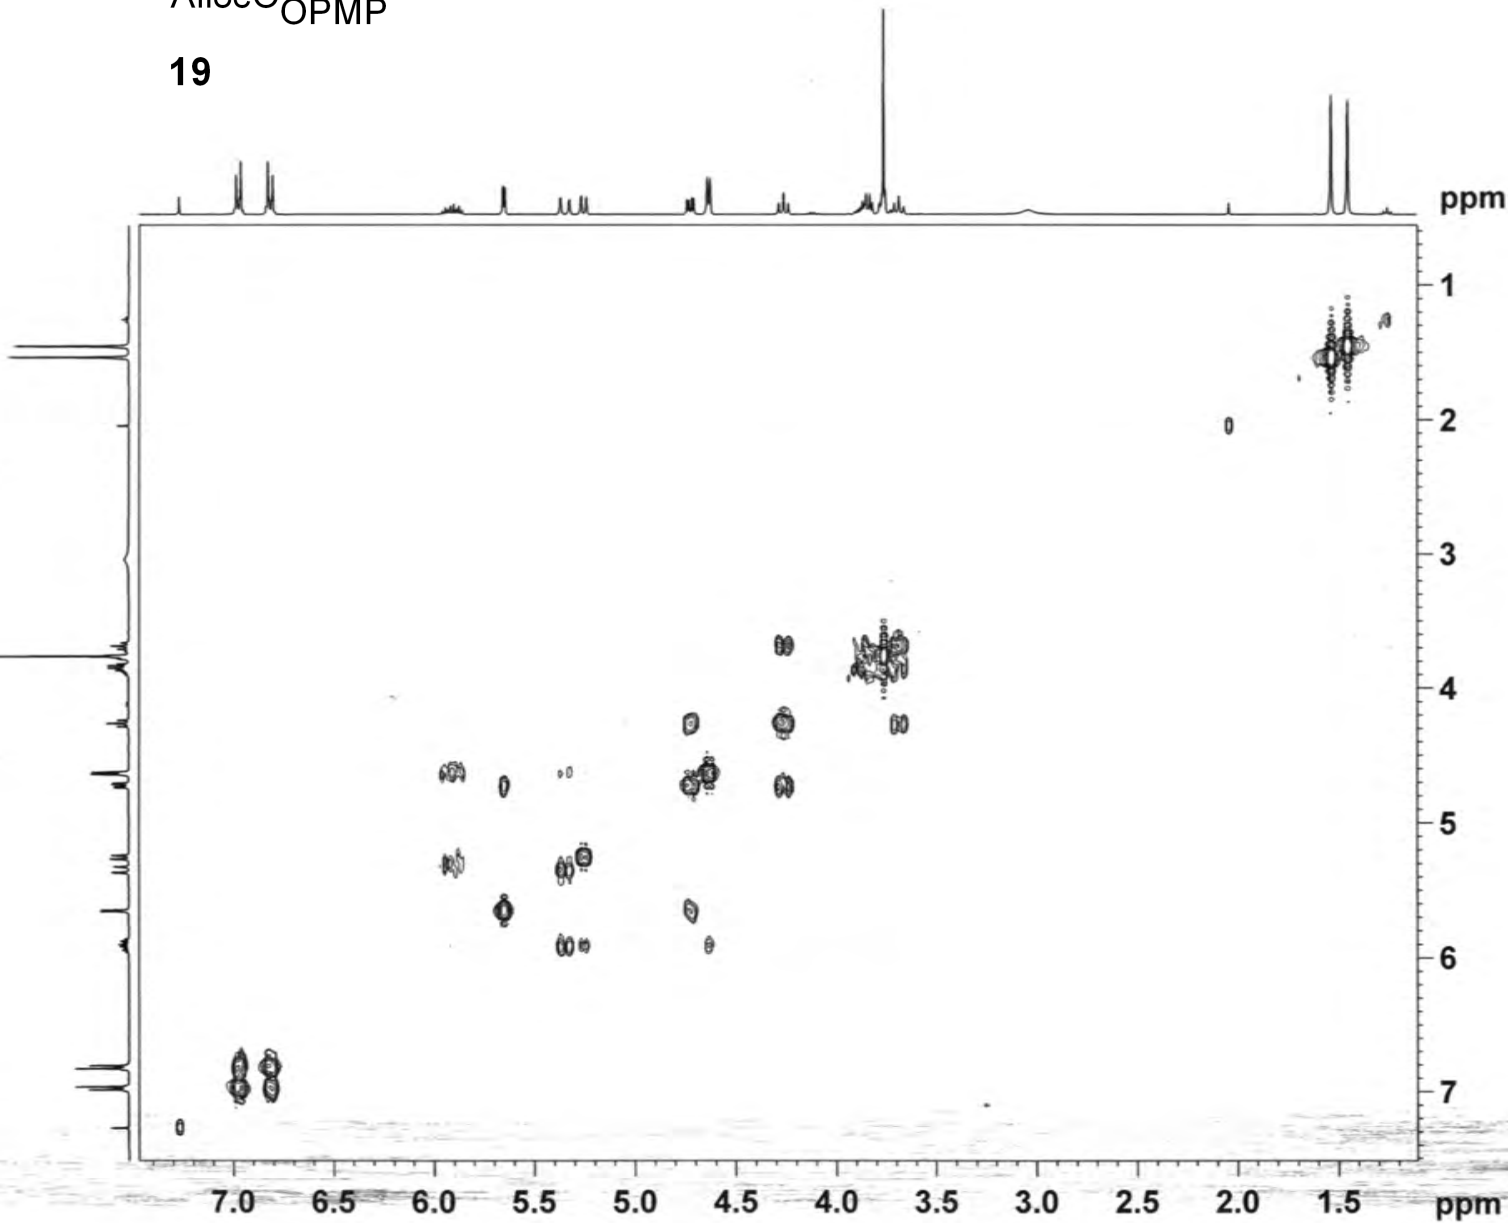

NAME ZGH-Ipom-1-152-A-131001  
 EXPNO 3  
 PROCNO 1  
 Date\_ 20131001  
 Time 22.51  
 INSTRUM spect  
 PROBHD 5 mm PABBO BB-  
 PULPROG cosygppqf  
 TD 2048  
 SOLVENT CDC13  
 NS 2  
 DS 8  
 SWH 5341.880 Hz  
 FIDRES 2.608340 Hz  
 AQ 0.1917428 sec  
 RG 71.8  
 DW 93.600 usec  
 DE 6.50 usec  
 TE 293.6 K  
 D0 0.00000300 sec  
 D1 1.48689198 sec  
 D13 0.00000400 sec  
 D16 0.00020000 sec  
 IN0 0.00018720 sec

===== CHANNEL f1 =====  
 NUC1 1H  
 P0 10.00 usec  
 P1 10.00 usec  
 PL1 -3.50 dB  
 PL1W 31.17620277 W  
 SF01 400.1324057 MHz

===== GRADIENT CHANNEL =====  
 GPNAM1 SINE.100  
 GPZ1 10.00 %  
 P16 1000.00 usec  
 NDO 1  
 TD 128  
 SF01 400.1324 MHz  
 FIDRES 41.733440 Hz  
 SW 13.350 ppm  
 FhMODE QF  
 SI 1024  
 SF 400.1300040 MHz  
 WDW SINE  
 SSB 0  
 LB 0.00 Hz  
 GB 0  
 PC 1.00  
 SI 1024  
 MC2 QF  
 SF 400.1300033 MHz  
 WDW SINE  
 SSB 0  
 LB 0.00 Hz  
 GB 0

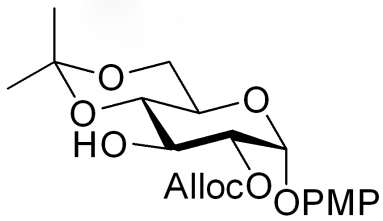

19

ZGH-*Ipom*-1-152-A-131001 HSQC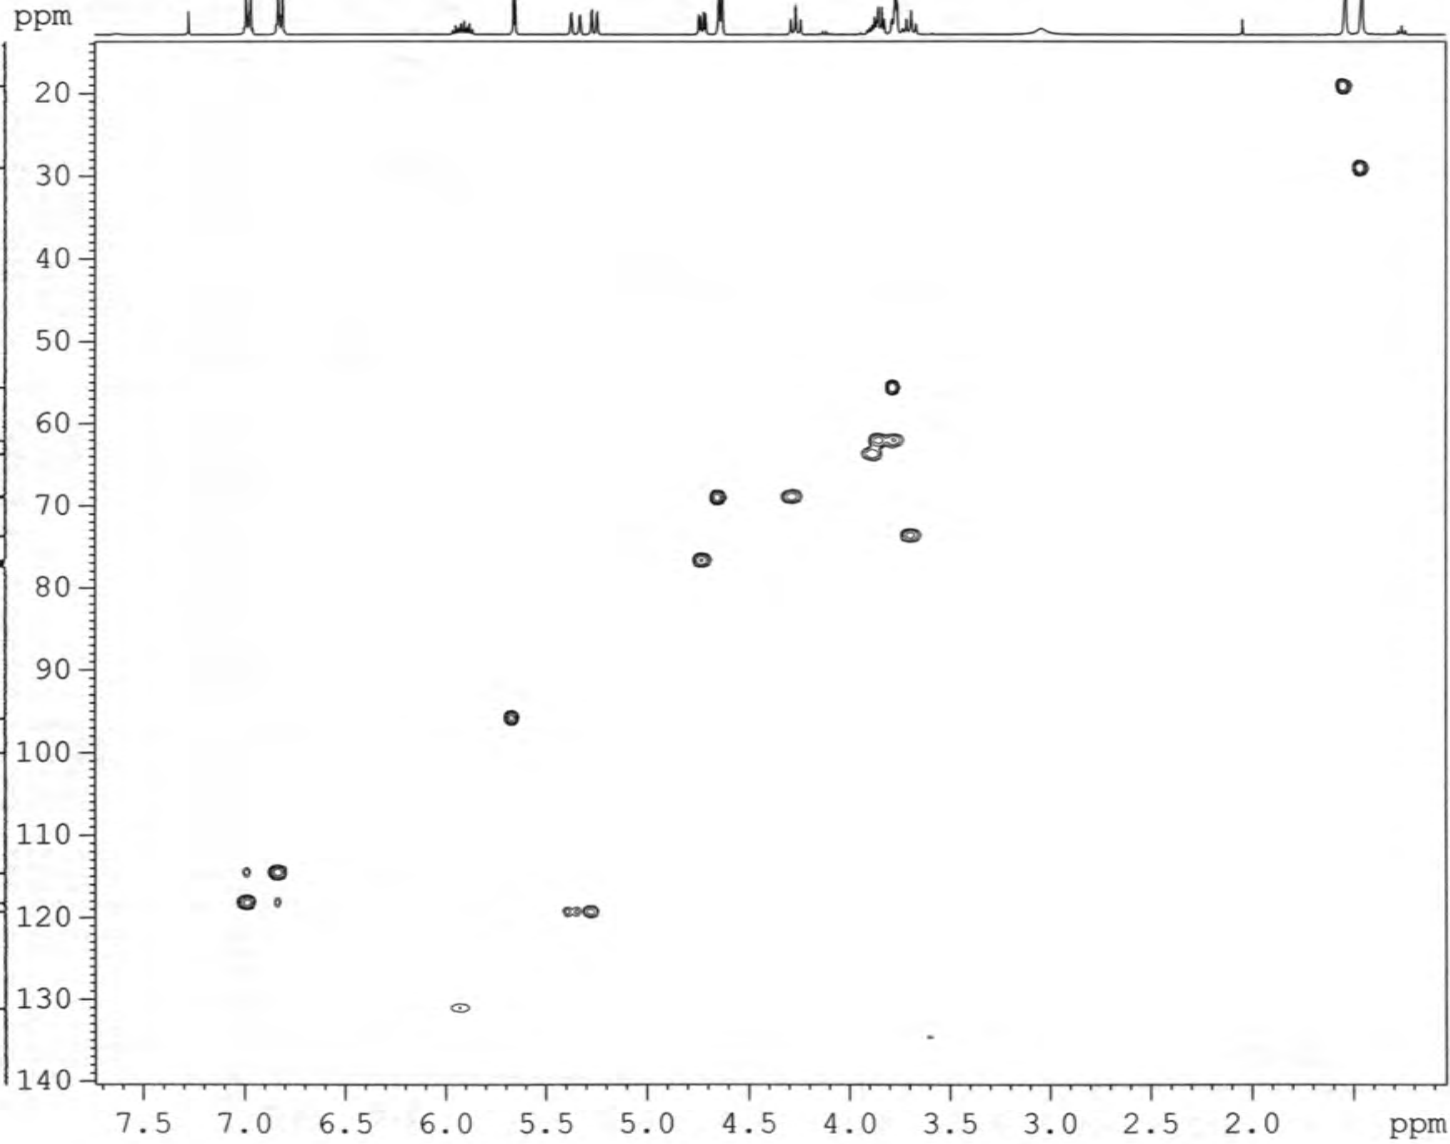

NAME ZGH-*Ipom*-1-152-A-131001  
 EXPNO 41  
 PROCNO 1  
 Date\_ 20150313  
 Time 0.08  
 INSTRUM spect  
 PROBHD 5 mm PABBO BB-  
 PULPROG hsqcetgpsi  
 TD 1024  
 SOLVENT CDCl3  
 NS 8  
 DS 16  
 SWH 5341.880 Hz  
 FIDRES 5.216680 Hz  
 AQ 0.0958964 sec  
 RG 2050  
 DW 93.600 usec  
 DE 6.50 usec  
 TE 292.3 K  
 CNST2 145.0000000  
 D0 0.0000300 sec  
 D1 1.5000000 sec  
 D4 0.00172414 sec  
 D11 0.03000000 sec  
 D13 0.00000400 sec  
 D16 0.00020000 sec  
 D24 0.00110000 sec  
 IN0 0.00003000 sec  
 ZGOPTNS

----- CHANNEL f1 -----  
 NUC1 1H  
 F1 10.00 usec  
 F2 20.00 usec  
 F28 1000.00 usec  
 PL1 -3.50 dB  
 PL1W 31.17620277 W  
 SFO1 400.1324057 MHz

----- CHANNEL f2 -----  
 CPDPRG2 garp  
 NUC2 13C  
 F3 10.00 usec  
 F4 20.00 usec  
 PCPD2 75.00 usec  
 PL2 -2.10 dB  
 PL12 15.40 dB  
 PL2W 58.37759399 W  
 PL12W 1.03811681 W  
 SFO2 100.6202727 MHz

----- GRADIENT CHANNEL -----  
 GPNAM1 SINE.100  
 GPNAM2 SINE.100  
 GPZ1 80.00 %  
 GPZ2 20.10 %  
 P16 1000.00 usec  
 ND0 2  
 TD 163  
 SFO1 100.6203 MHz  
 FIDRES 102.249489 Hz  
 SW 165.639 ppm  
 FnMODE Echo-Antiecho  
 SI 1024  
 SF 400.1300000 MHz  
 WDW QSINE  
 SSB 2  
 LB 0.00 Hz  
 GB 0  
 PC 1.00  
 SI 1024  
 MC2 echo-antiecho  
 SF 100.6127690 MHz  
 WDW QSINE  
 SSB 2  
 LB 0.00 Hz  
 GB 0

## ZGH-Ipom-1-153-A-140203 1H in MeOD

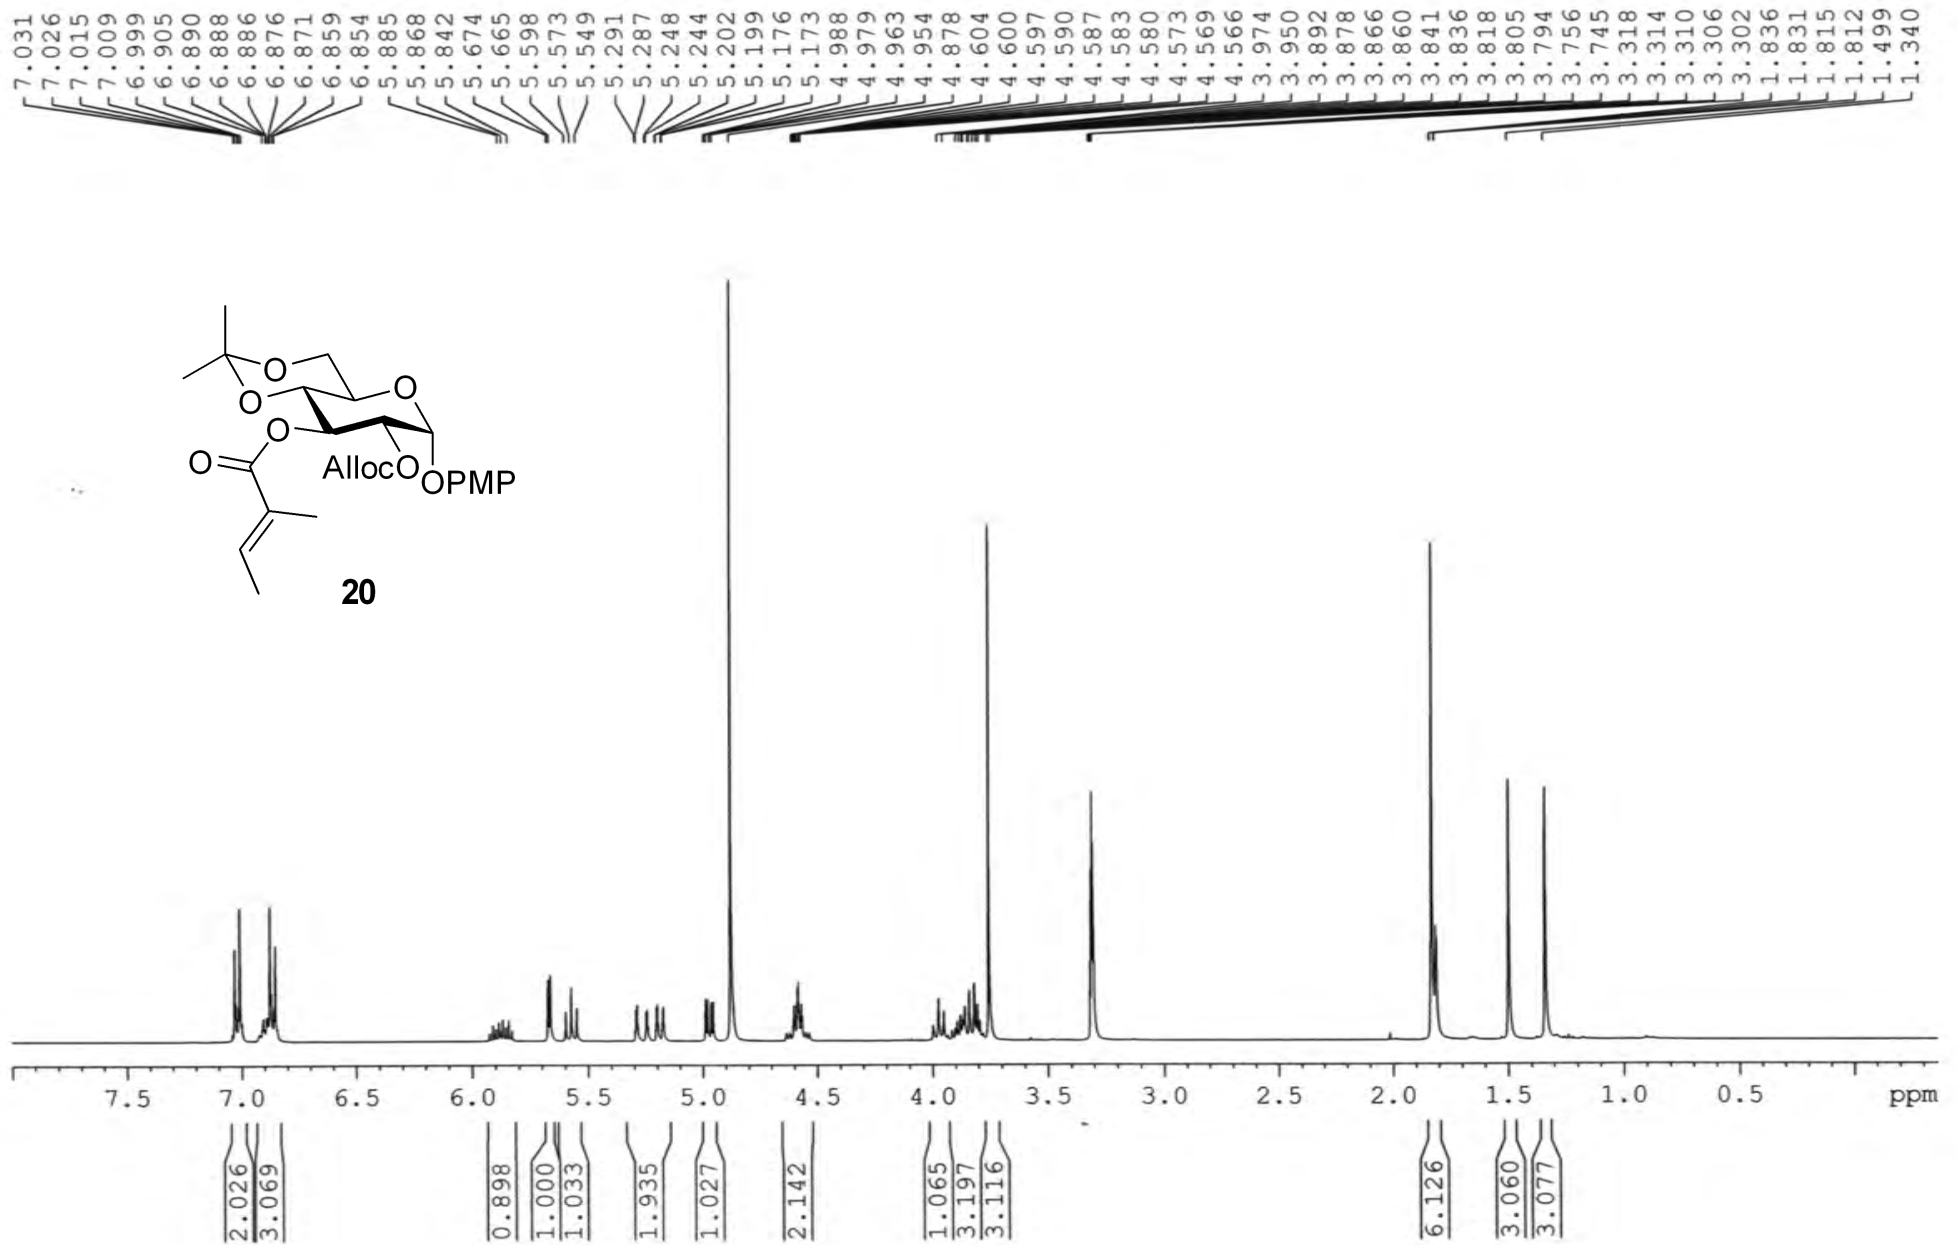

ZGH-*Ipom*-1-153-A-140203 <sup>13</sup>C in MeOD

— 168.420  
— 157.029  
— 155.643  
— 151.671  
  
— 139.549  
— 132.844  
— 129.199  
  
— 119.408  
— 118.875  
— 115.730  
  
— 101.150  
— 97.667  
  
— 75.892  
— 73.092  
— 70.836  
— 69.810  
— 65.656  
— 63.062  
— 56.048  
— 49.641  
— 49.430  
— 49.215  
— 49.002  
— 48.791  
— 48.577  
— 48.363  
  
— 29.336  
  
— 19.384  
— 14.504  
— 12.230

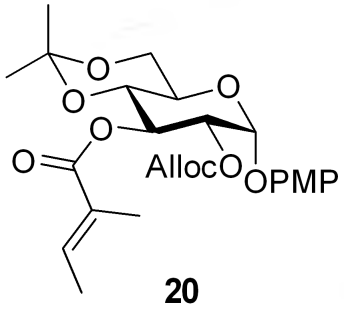

170 160 150 140 130 120 110 100 90 80 70 60 50 40 30 20 10 0 ppm

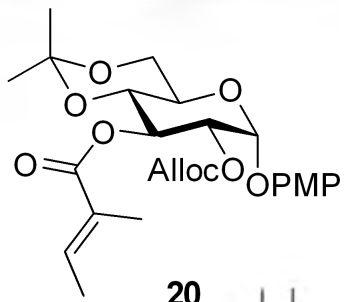

## ZGH-Ipom-1-153-A-140203 COSY in MeOD

20

ppm

NAME ZGH-Ipom-1-153-A-140203 check agai  
 EXPNO 2  
 PROCNO 1  
 Date\_ 20140512  
 Time 22.45  
 INSTRUM spect  
 PROBHD 5 mm PABBO BB-  
 PULPROG cosygpgf  
 TD 2048  
 SOLVENT MeOD  
 NS 2  
 DS 8  
 SWH 5341.880 Hz  
 FIDRES 2.608340 Hz  
 AQ 0.1917428 sec  
 RG 362  
 DW 93.600 usec  
 DE 6.50 usec  
 TE 292.2 K  
 DO 0.00000300 sec  
 D1 1.48689198 sec  
 D13 0.00000400 sec  
 D16 0.00020000 sec  
 INO 0.00018720 sec

===== CHANNEL f1 =====  
 NUC1 1H  
 PO 10.00 usec  
 P1 10.00 usec  
 PL1 -3.50 dB  
 PL1W 31.17620277 W  
 SFO1 400.1324057 MHz

===== GRADIENT CHANNEL =====  
 GPNAM1 SINE 100  
 GPZ1 10.00 %  
 P16 1000.00 usec  
 ND0 1  
 TD 128  
 SFO1 400.1324 MHz  
 FIDRES 41.733440 Hz  
 SW 13.350 ppm  
 FmMODE QF  
 SI 1024  
 SF 400.1300040 MHz  
 WDW SINE  
 SSB 0  
 LB 0.00 Hz  
 GB 0  
 PC 1.00  
 SI 1024  
 MC2 QF  
 SF 400.1300033 MHz  
 WDW SINE  
 SSB 0  
 LB 0.00 Hz  
 GB 0

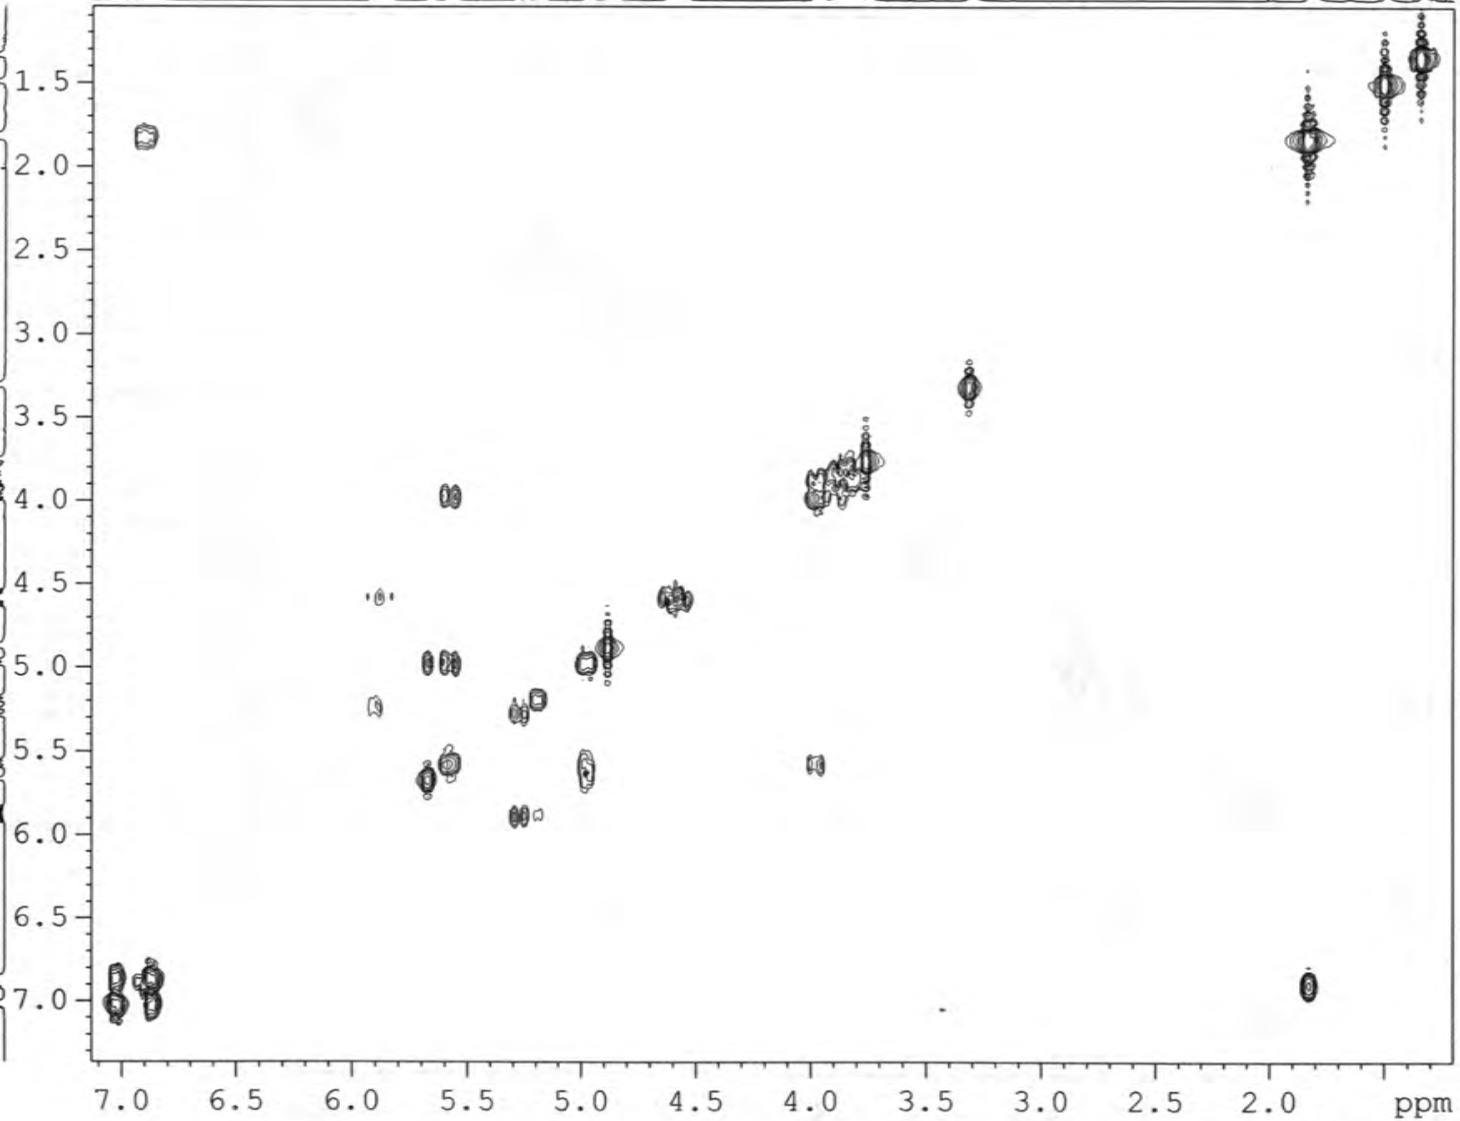



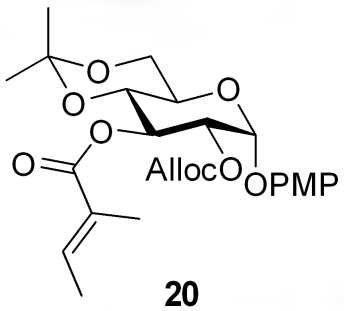ZGH-*Ipom*-1-153-A-140203 HSQC in MeOD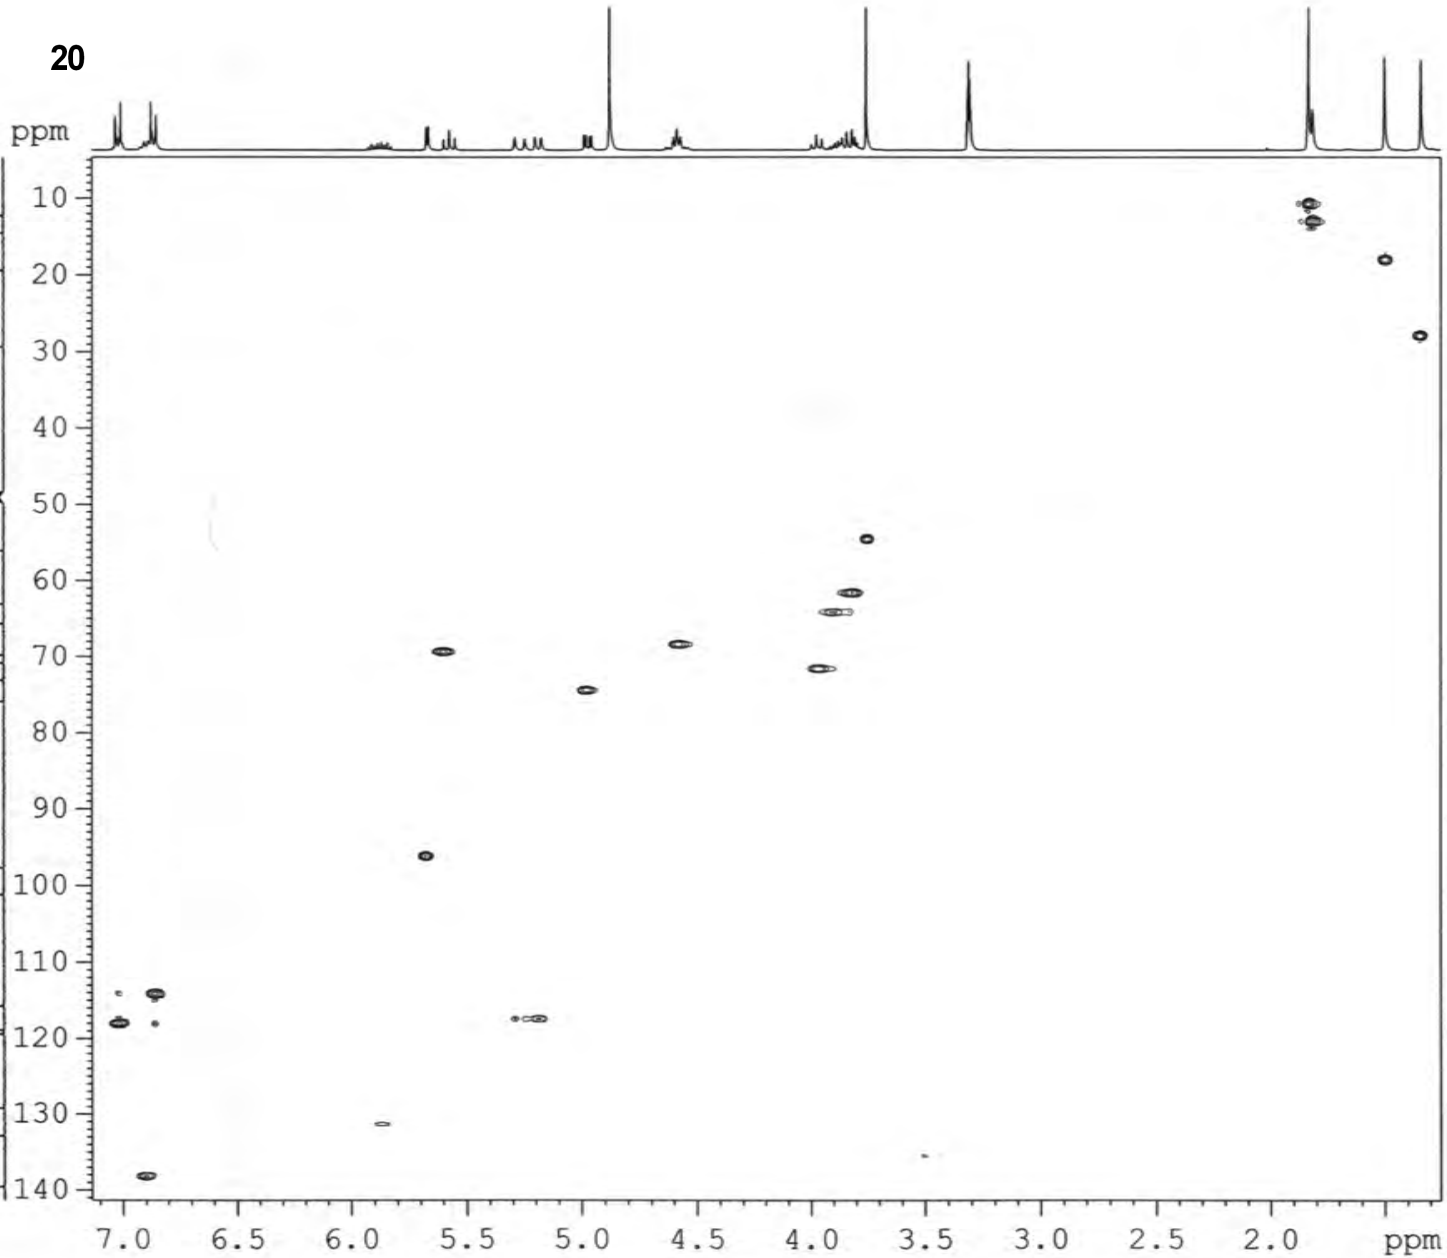

NAME ZGH-*Ipom*-1-153-A-140203 check again  
 EXPNO 4  
 PROCNO 1  
 Date\_ 20140512  
 Time 23.30  
 INSTRUM spect  
 PROBHD 5 mm FAPBO BB-  
 PULPROG hsqcetpsi  
 TD 1024  
 SOLVENT MeOD  
 NS 2  
 DS 16  
 SWH 5341.880 Hz  
 FIDRES 5.216680 Hz  
 AQ 0.0958964 sec  
 RG 2050  
 DW 93.600 usec  
 DE 6.50 usec  
 TE 293.0 K  
 CNST2 145.0000000  
 DO 0.0000300 sec  
 D1 1.5000000 sec  
 D4 0.00172414 sec  
 D11 0.03000000 sec  
 D13 0.00000400 sec  
 D16 0.00020000 sec  
 D24 0.00110000 sec  
 IN0 0.00003000 sec  
 ZGPTNS

===== CHANNEL f1 =====  
 NUC1 1H  
 P1 10.00 usec  
 P2 20.00 usec  
 P28 1000.00 usec  
 PL1 -3.50 dB  
 PL1W 31.17620277 W  
 SFO1 400.1324057 MHz

===== CHANNEL f2 =====  
 CPDPRG2 garp  
 NUC2 13C  
 P3 10.00 usec  
 P4 20.00 usec  
 PCPD2 75.00 usec  
 PL2 -2.10 dB  
 PL12 15.40 dB  
 PL2W 58.37759399 W  
 PL12W 1.03811681 W  
 SFO2 100.6202727 MHz

===== GRADIENT CHANNEL =====  
 GPNAM1 SINE.100  
 GPNAM2 SINE.100  
 GFZ1 80.00 %  
 GFZ2 20.10 %  
 P16 1000.00 usec  
 ND0 2  
 TD 256  
 SFO1 100.6203 MHz  
 FIDRES 65.104164 Hz  
 SW 165.639 ppm  
 FhMODE Echo-Antiecho  
 SI 1024  
 SF 400.1300000 MHz  
 WDW QSINE  
 SSB 2  
 LB 0.00 Hz  
 GB 0  
 PC 1.00  
 SI 1024  
 MC2 echo-antiecho  
 SF 100.6127690 MHz  
 WDW QSINE  
 SSB 2  
 LB 0.00 Hz  
 GB 0

ZGH-Ipom-1-175-A-131028 1H in CDCL3

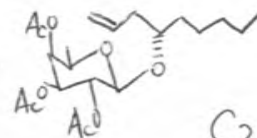C<sub>21</sub>H<sub>34</sub>O<sub>8</sub>

7.271  
7.270  
5.775  
5.758  
5.732  
5.213  
5.205  
5.178  
5.158  
5.152  
5.132  
5.078  
5.075  
5.047  
5.044  
5.042  
5.033  
5.021  
5.012  
4.994  
4.986  
4.482  
4.463  
3.772  
3.755  
3.634  
3.619  
3.605  
2.247  
2.231  
2.216  
2.169  
2.033  
2.007  
1.978  
1.667  
1.577  
1.554  
1.518  
1.497  
1.481  
1.340  
1.323  
1.306  
1.287  
1.280  
1.270  
1.236  
1.215  
1.203  
1.187  
0.894  
0.878  
0.860

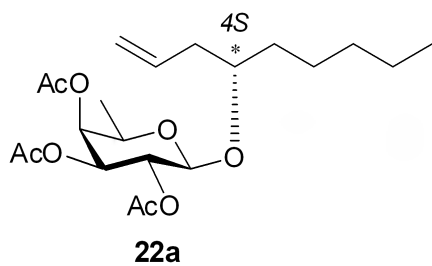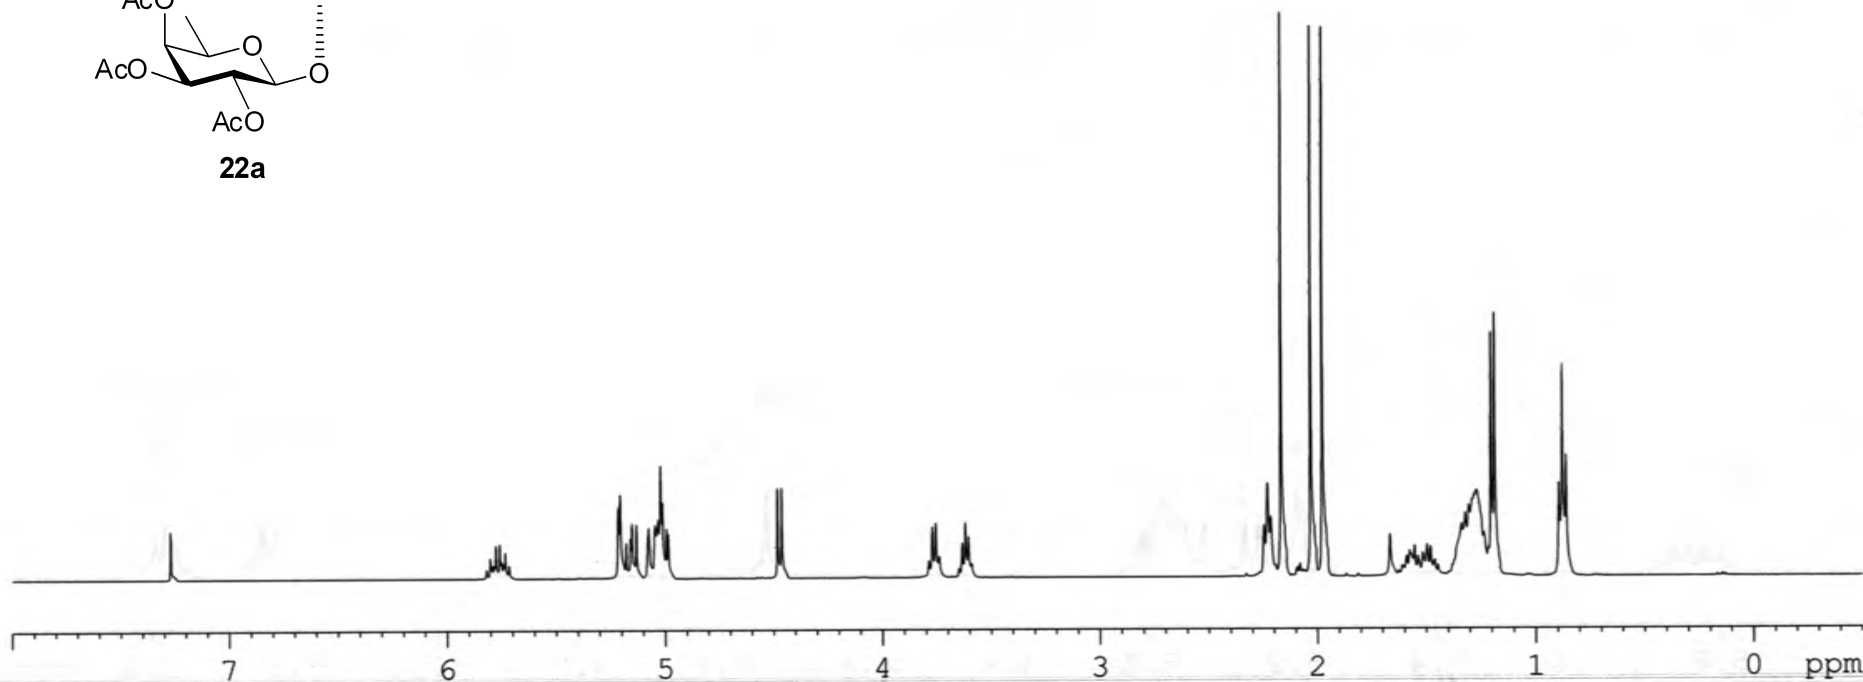

0.981

1.030

1.022

3.097

1.000

1.072

1.018

2.003

3.143

3.027

3.064

2.113

6.272

3.338

3.129

ZGH-*Ipom*-1-175-A-131028  $^{13}\text{C}$  in  $\text{CDCl}_3$ 170.775  
170.262  
169.407

— 134.402

— 117.011

— 100.485

80.160  
77.301  
76.983  
76.665  
71.482  
70.306  
69.239  
68.89238.373  
34.363  
31.686  
24.601  
22.521  
20.837  
20.698  
20.613  
16.070  
14.002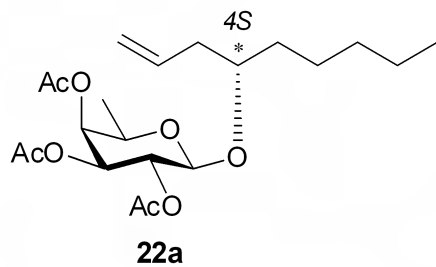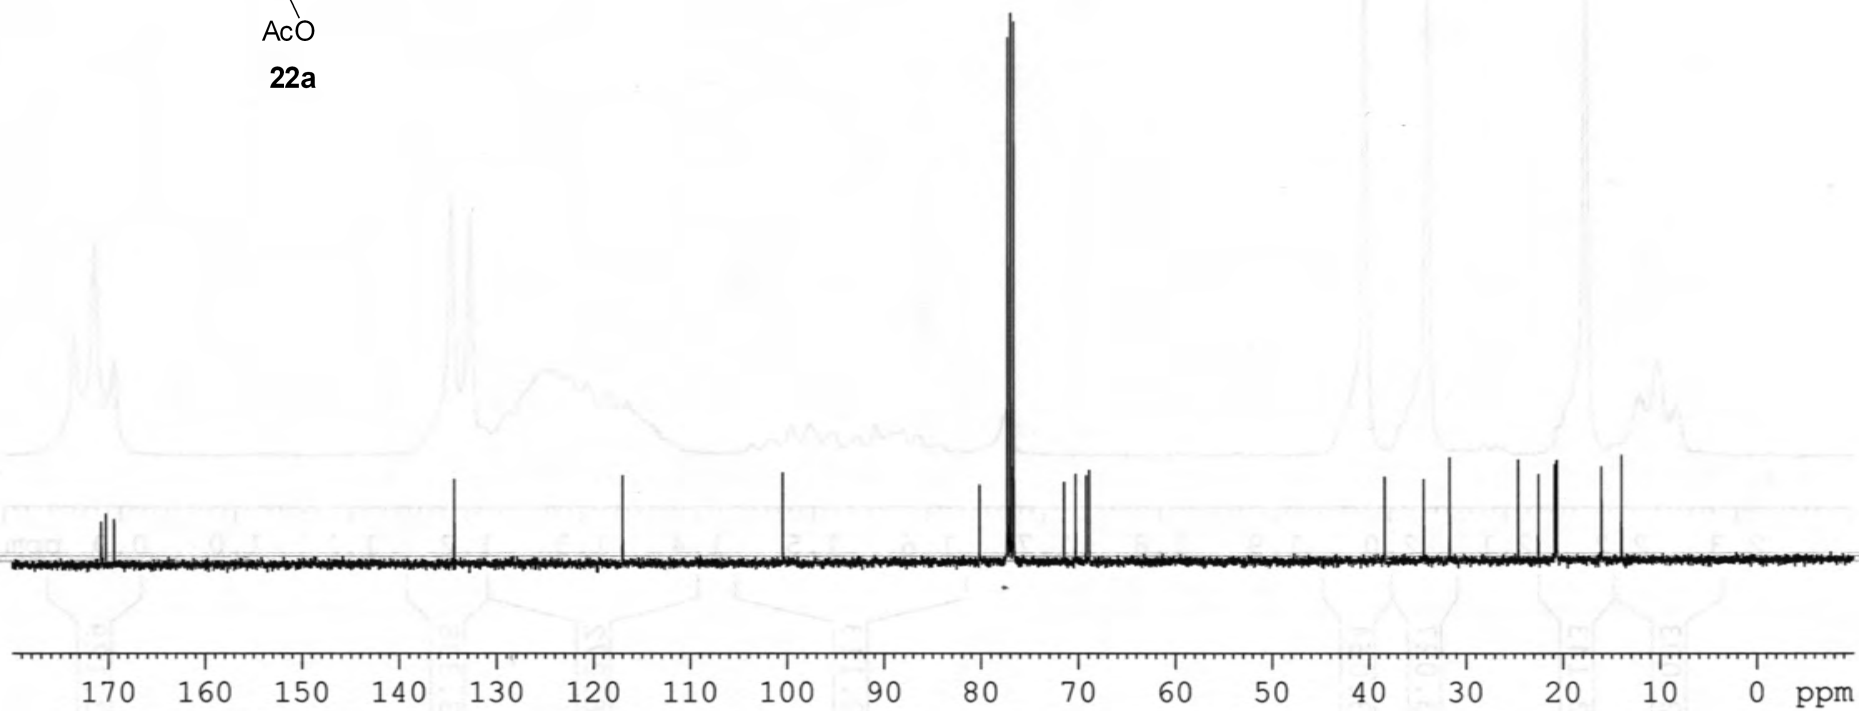

EDB-Ipom-1-99-A-150513 (2) 1H in CDCL3

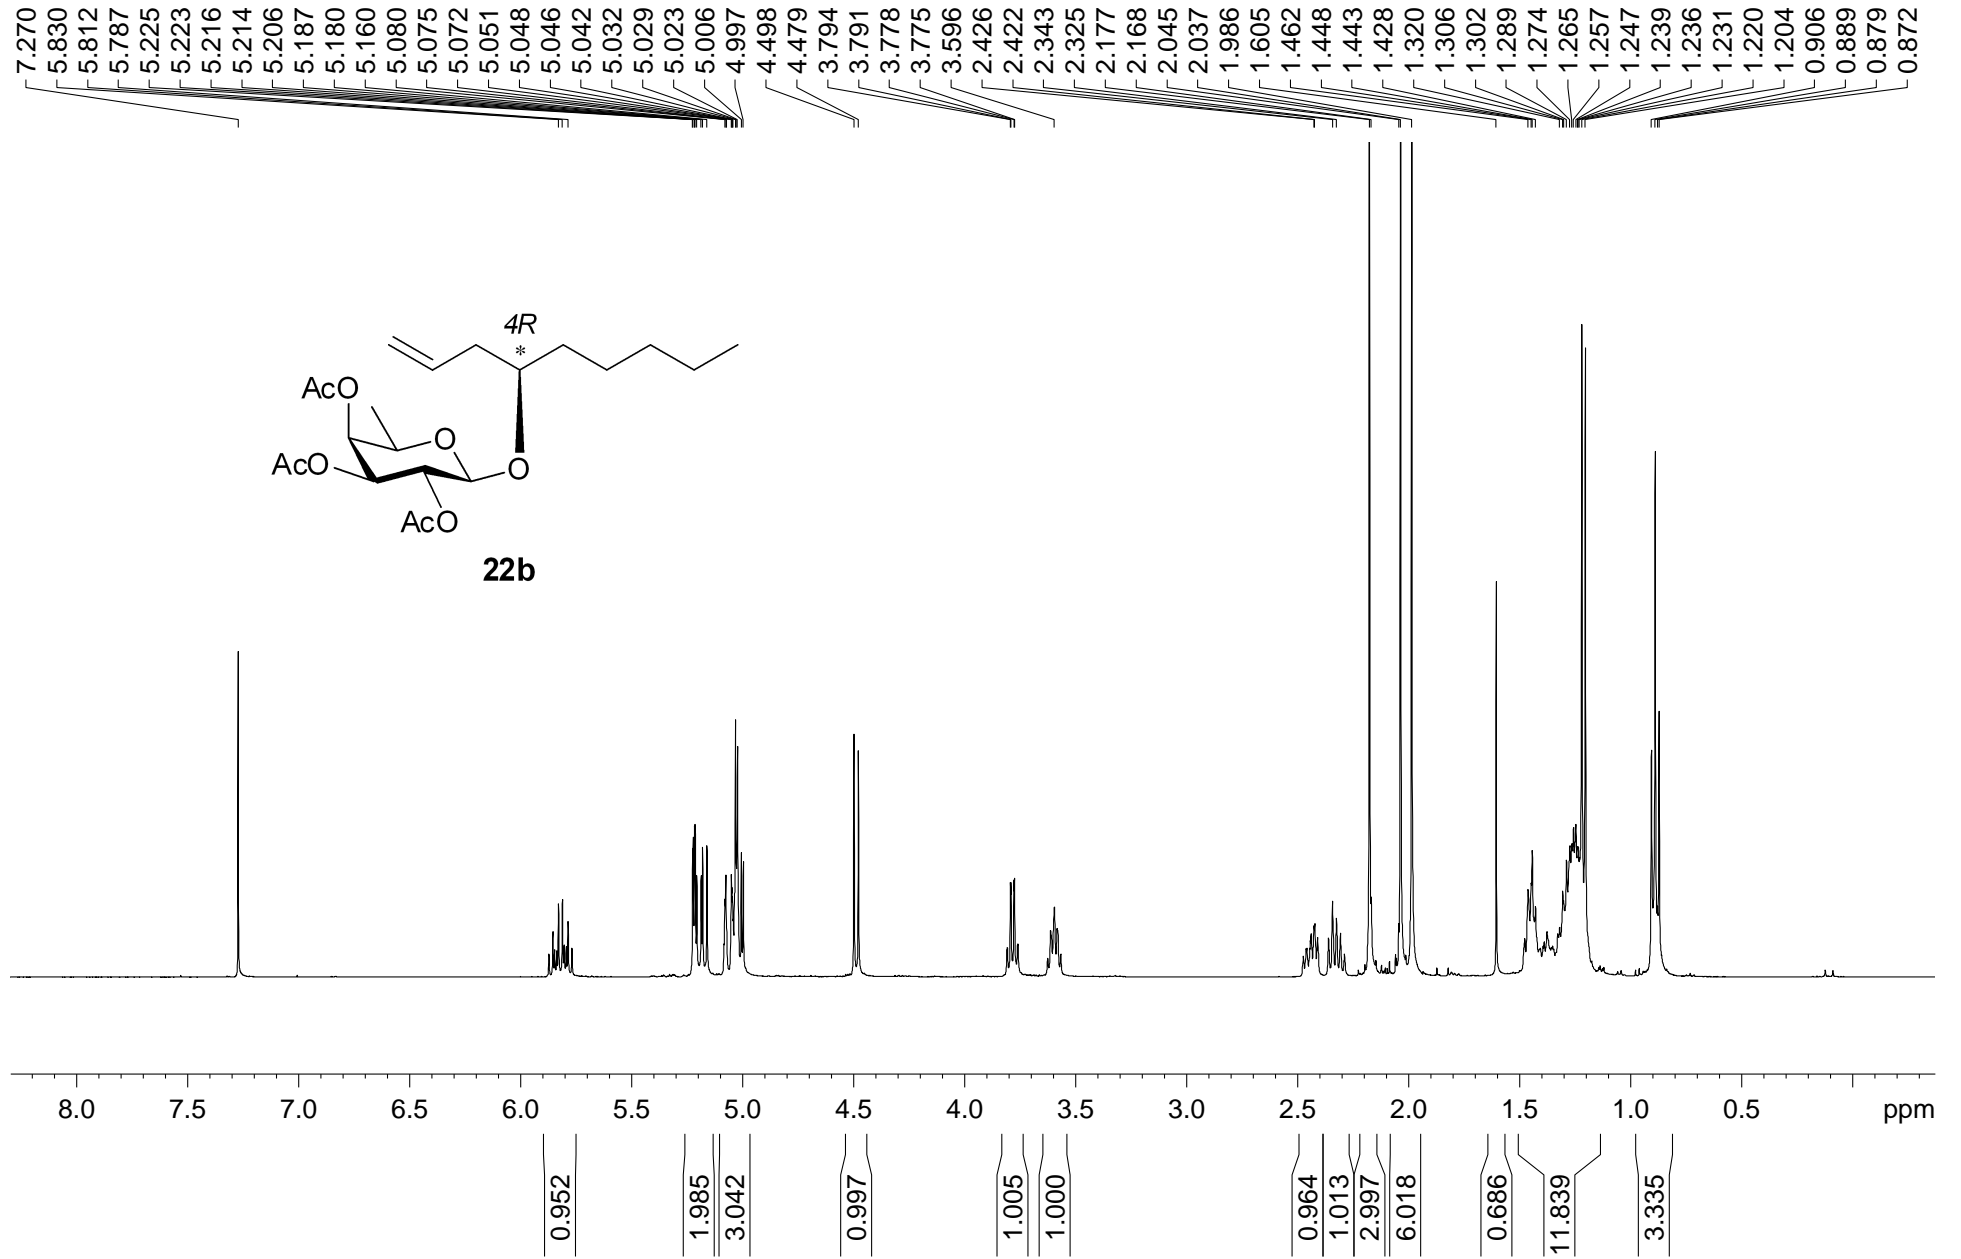

EDB-Ipom-1-99-A-150513 (2)  $^{13}\text{C}$  in  $\text{CDCl}_3$ 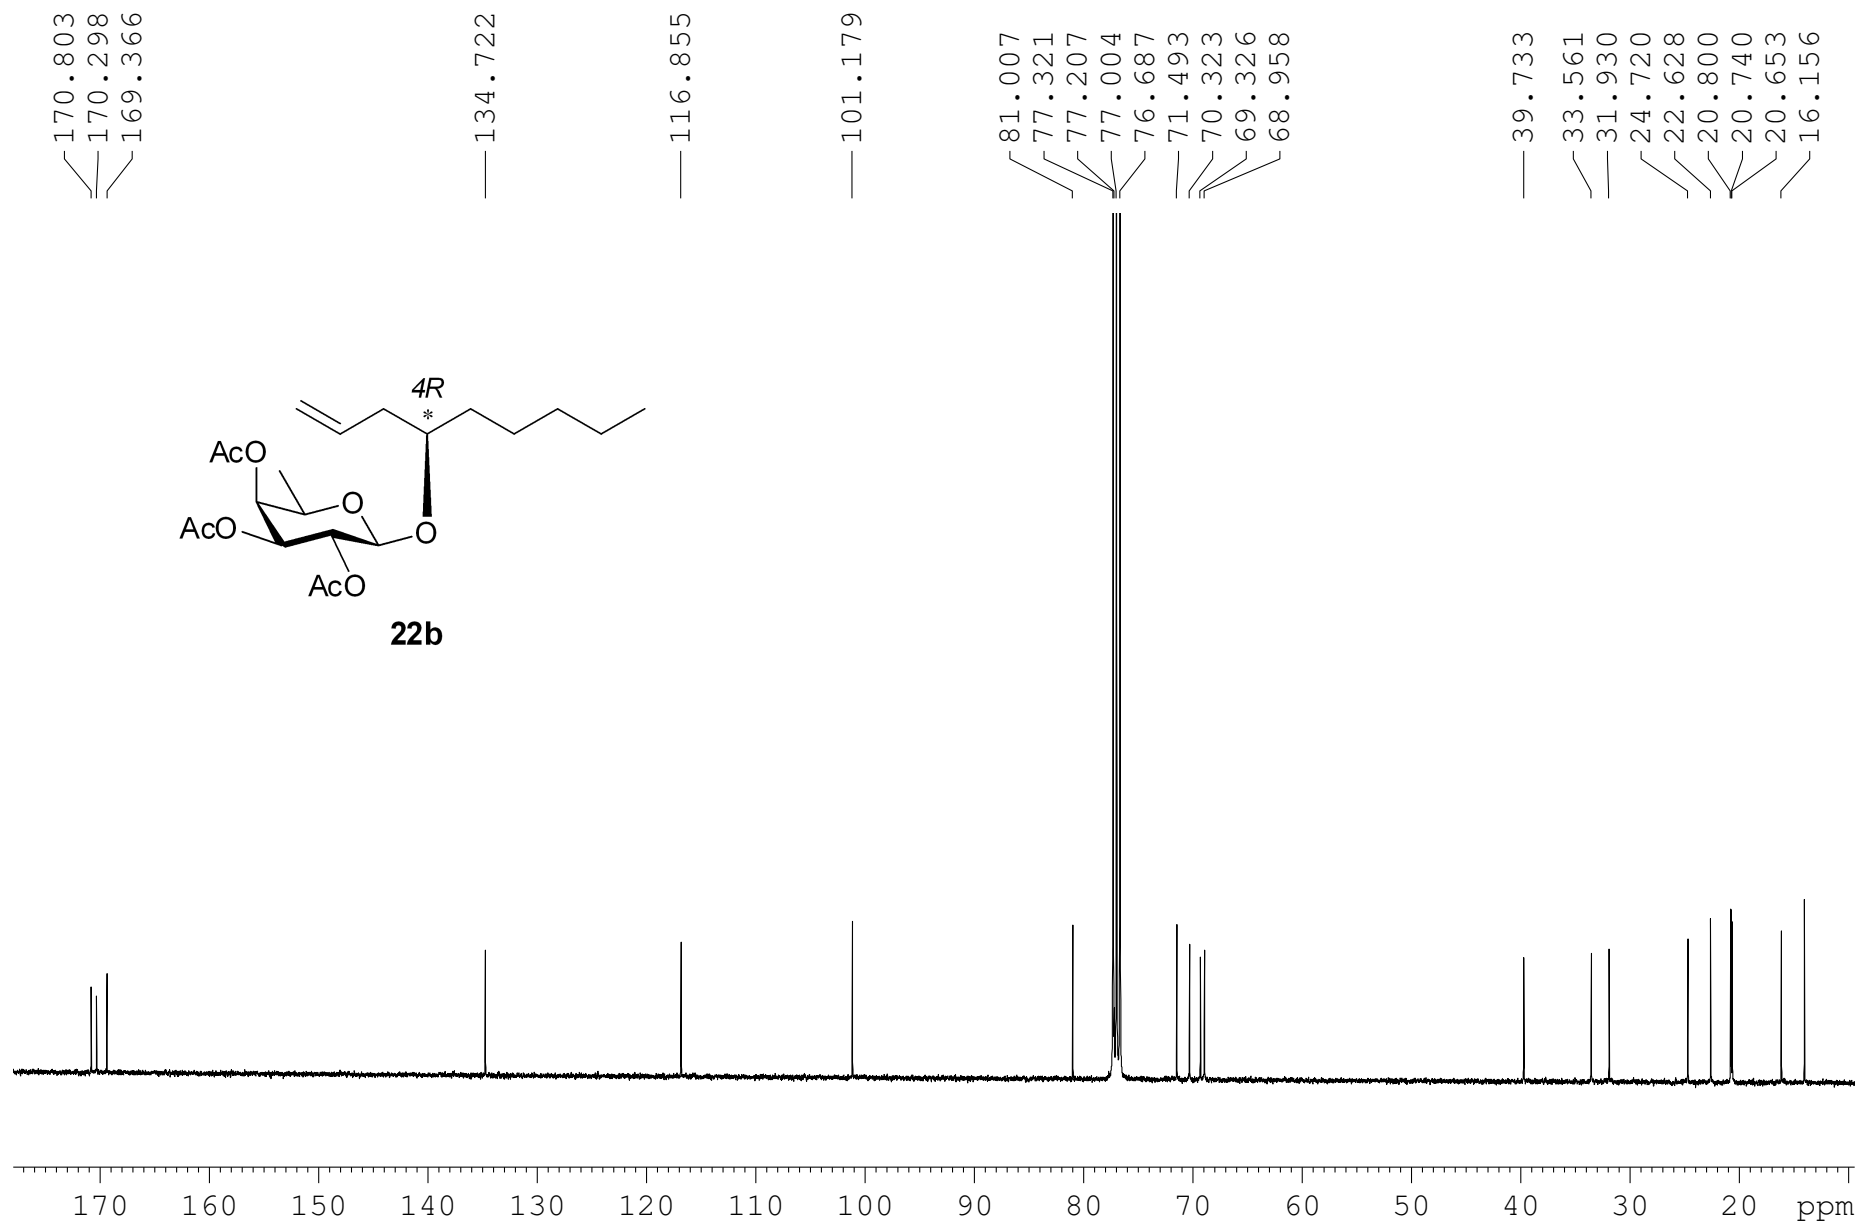

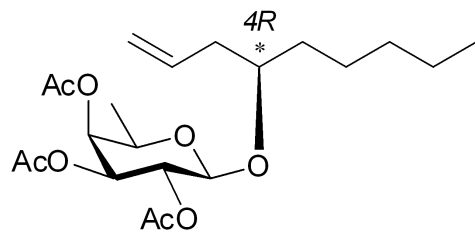

22b

EDB-*Ipom*-1-99-A-150513 (2) COSY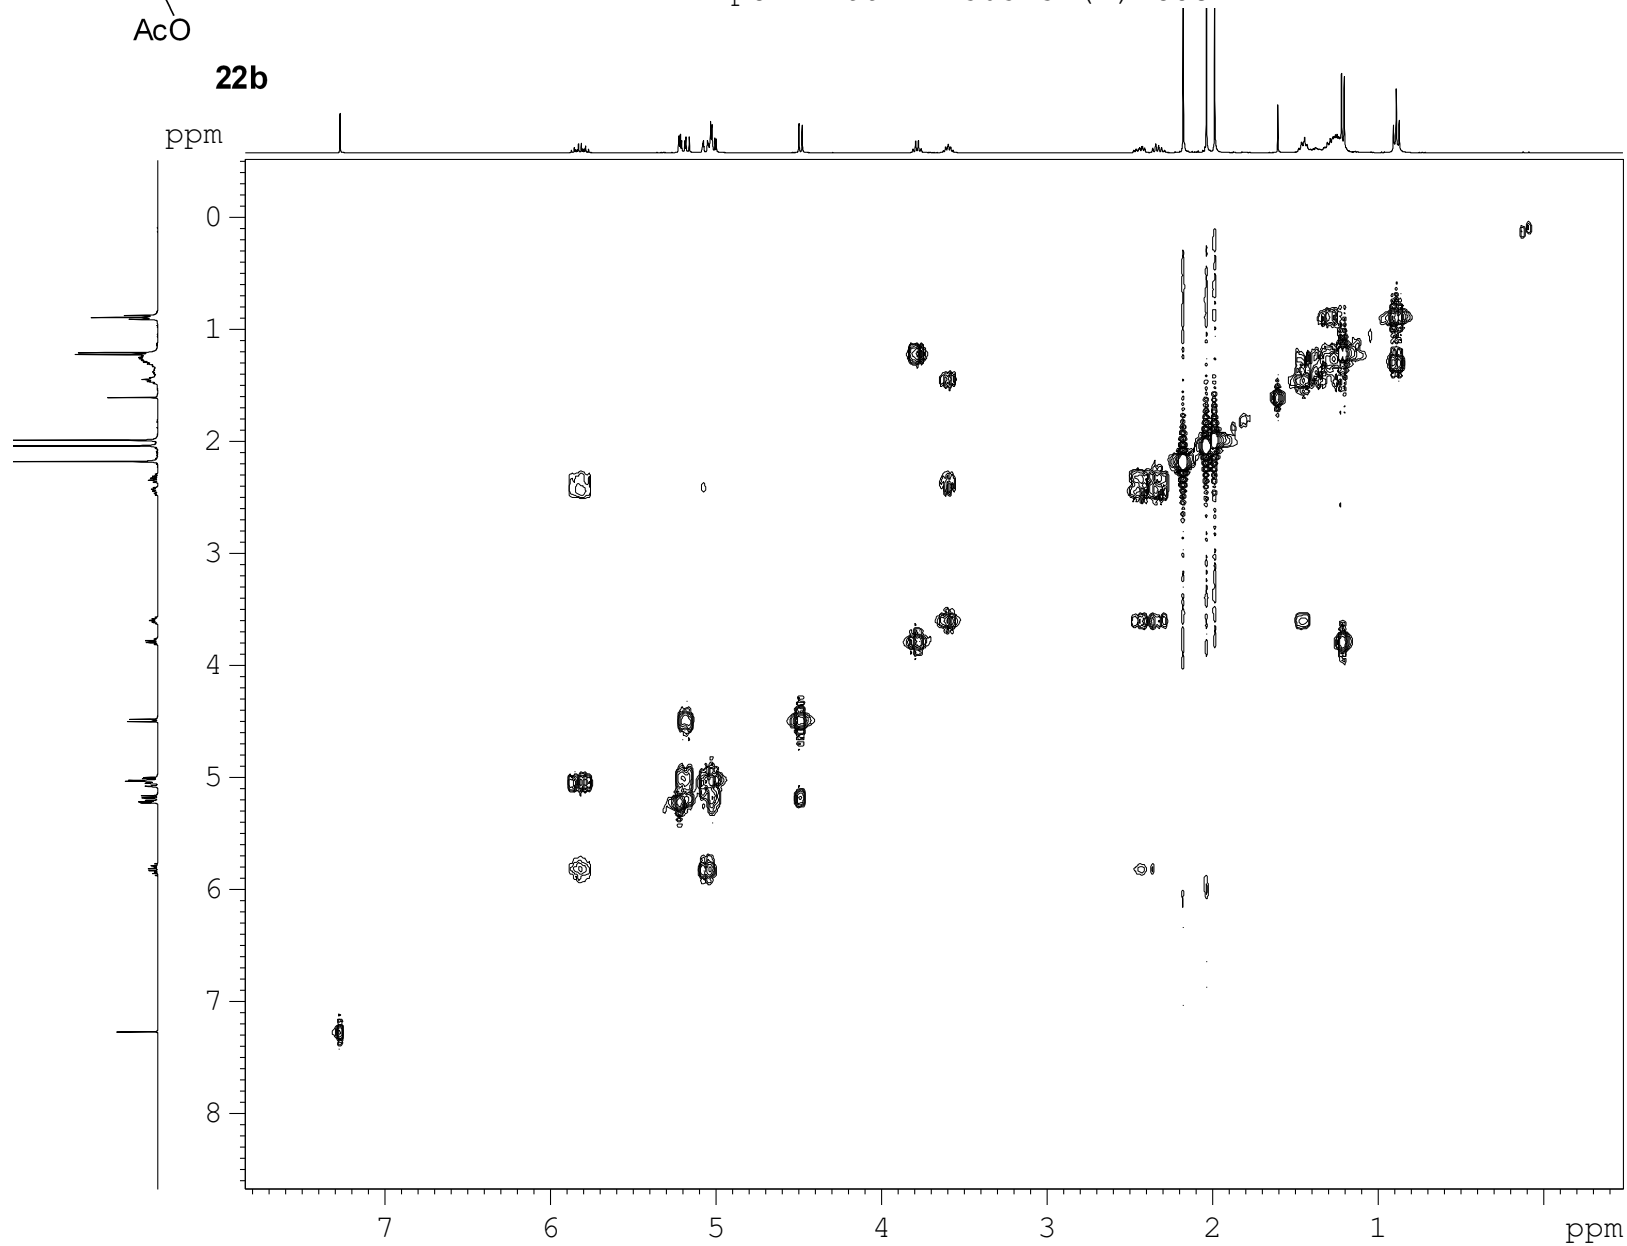

```

NAME      EDB-Ipom-1-99-A-150513 (2)
EXPNO     1
PROCNO    1
Date_     20150623
Time      23.33
INSTRUM   spect
PROBHD    5 mm PABBO BB-
PULPROG   cosygpgf
TD         2048
SOLVENT   CDCl3
NS         4
DS         8
SWH       5341.880 Hz
FIDRES    2.608340 Hz
AQ         0.1917428 sec
RG         203
DW         93.600 usec
DE         6.50 usec
TE         292.5 K
D0         0.00000300 sec
D1         1.48689198 sec
D13        0.00000400 sec
D16        0.00020000 sec
IN0        0.00018720 sec

```

```

===== CHANNEL f1 =====
NUC1      1H
P0         10.00 usec
P1         10.00 usec
PL1        -3.50 dB
PL1W       31.17620277 W
SFO1       400.1324057 MHz

```

```

===== GRADIENT CHANNEL =====
GPNAM1    SINE.100
GPZ1       10.00 %
P16        1000.00 usec
ND0         1
TD         128
SFO1       400.1324 MHz
FIDRES     41.733440 Hz
SW         13.350 ppm
FnMODE     QF
SI         1024
SF         400.1300040 MHz
WDW        SINE
SSB         0
LB         0.00 Hz
GB         0
PC         1.00
SI         1024
MC2        QF
SF         400.1300033 MHz
WDW        SINE
SSB         0
LB         0.00 Hz
GB         0

```

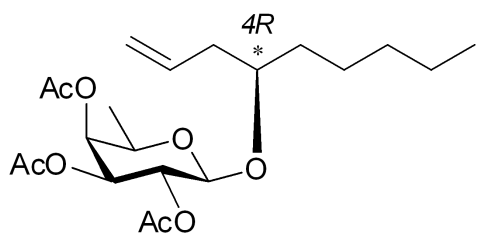

EDB-*Ipom*-1-99-A-150513 (2) HSQC

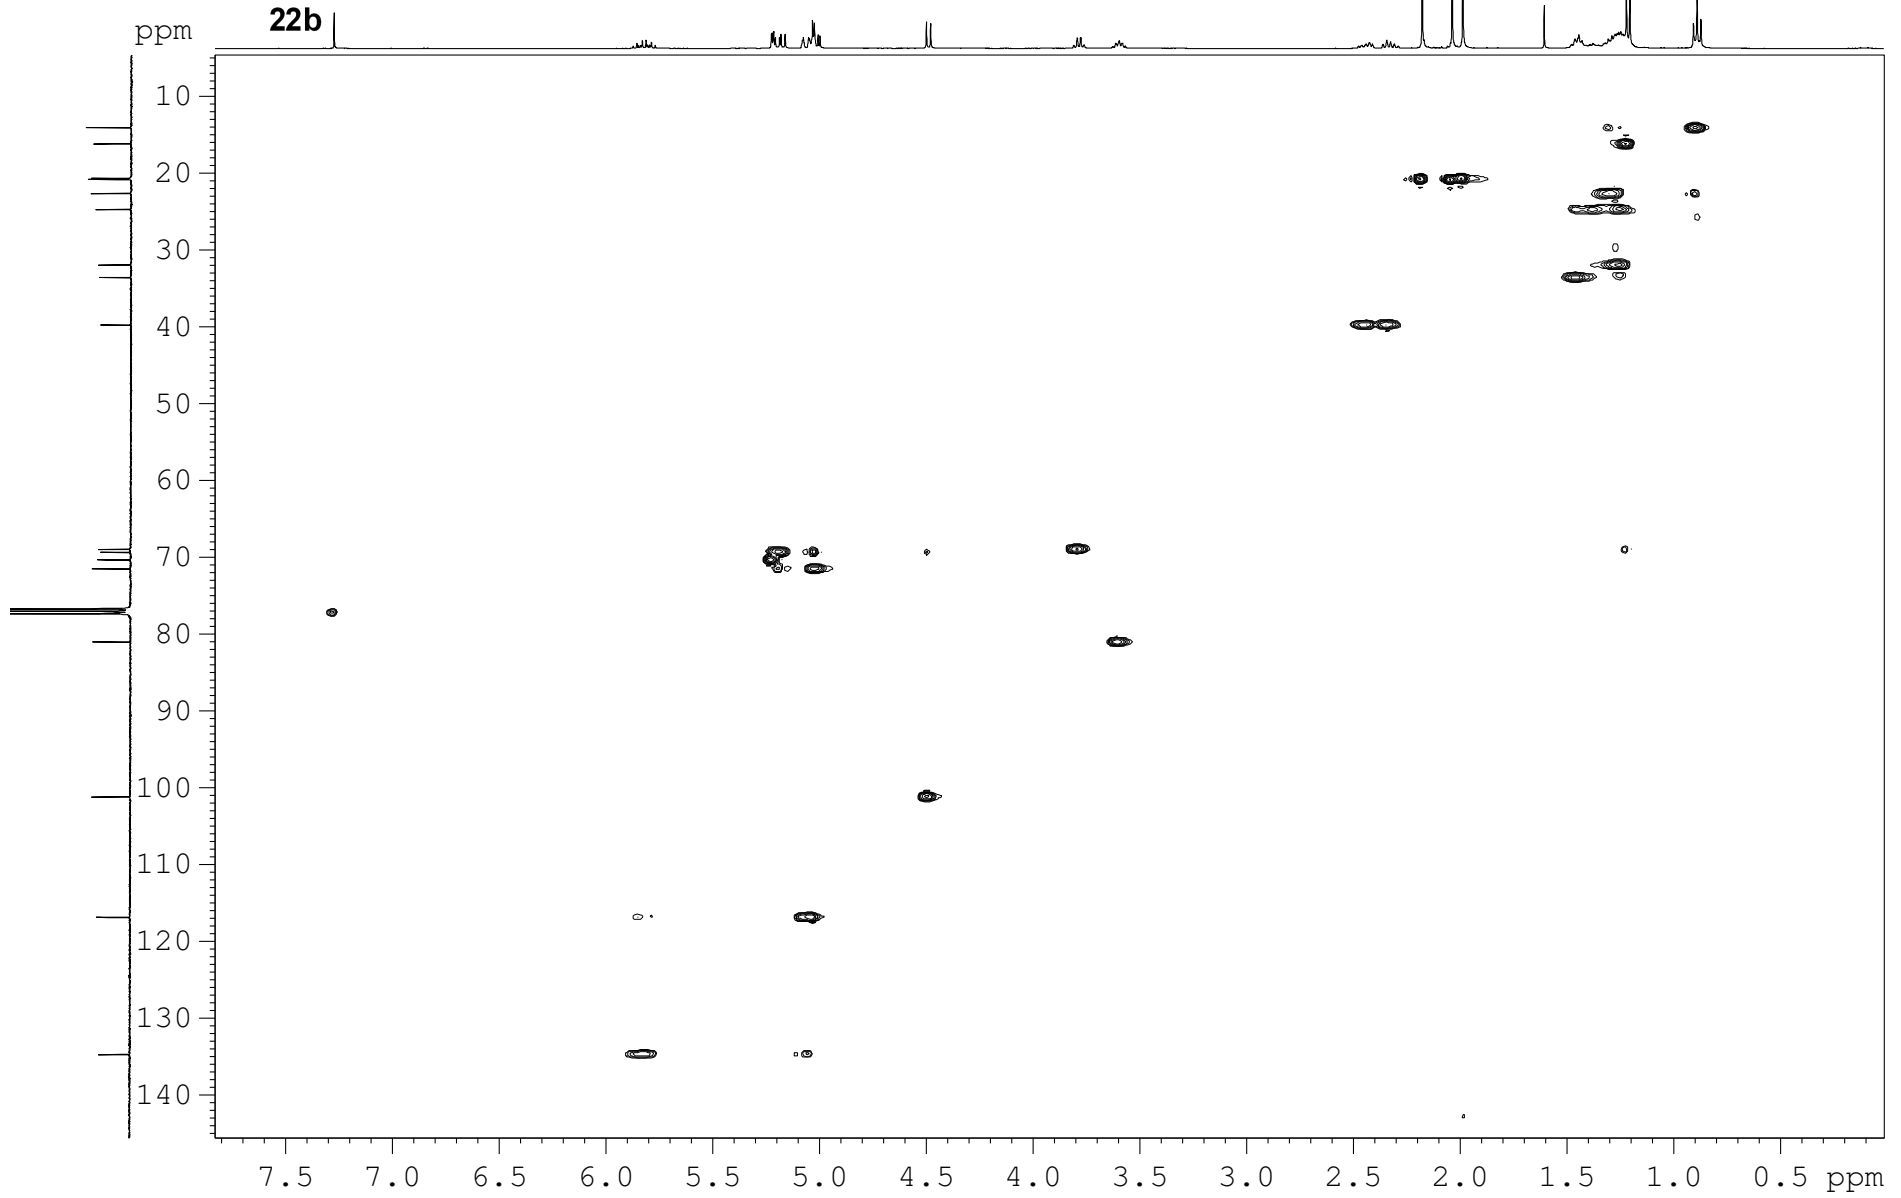

## ZGH-Ipom-1-176-A-131029 1H in CDCl3

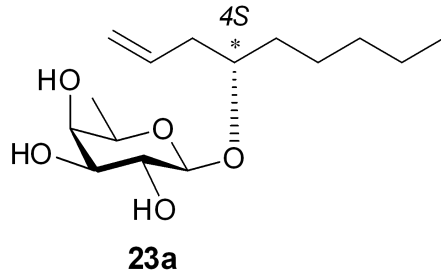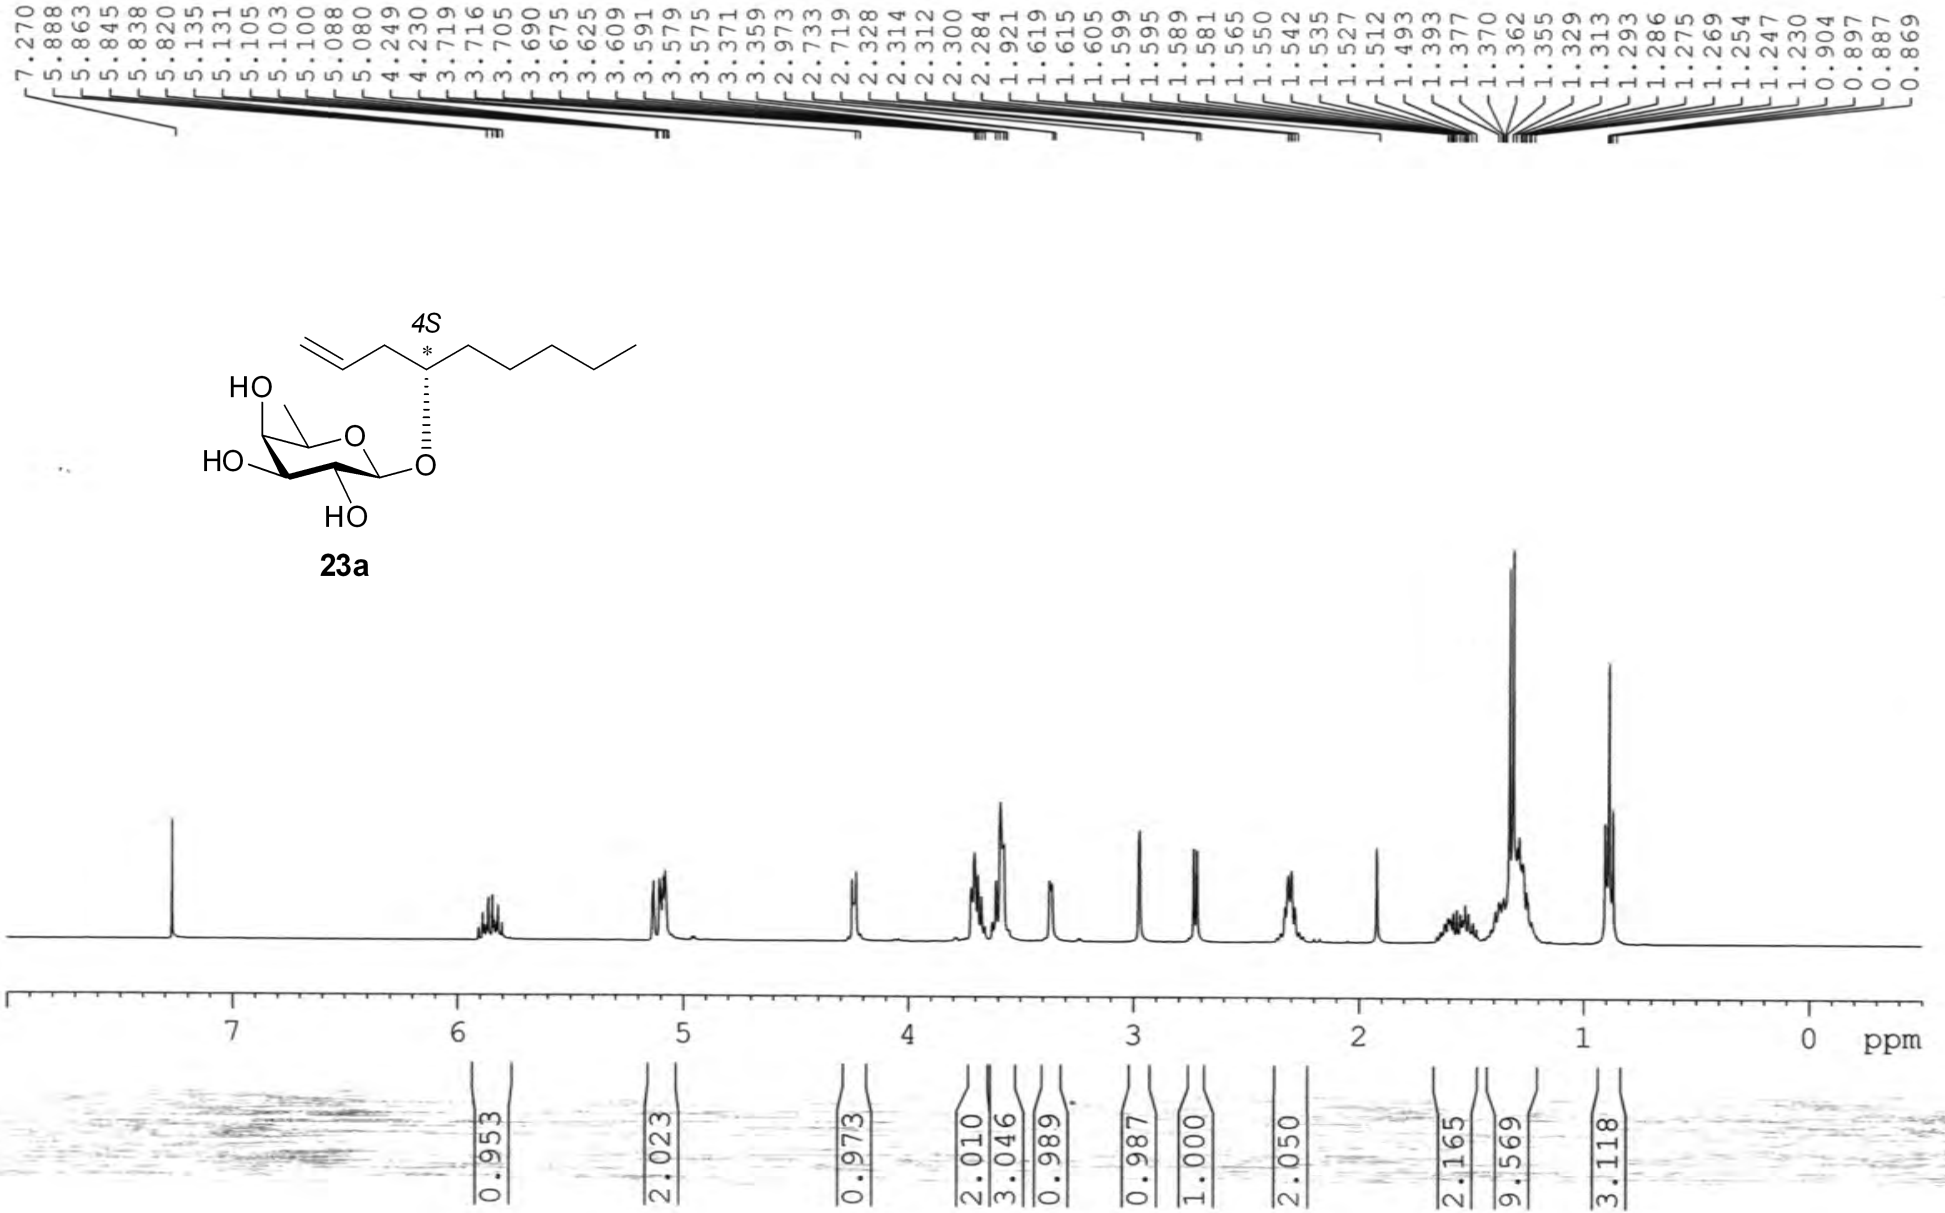



ZGH-*Ipom*-1-176-A-131029 Check 150316 13C in CDC13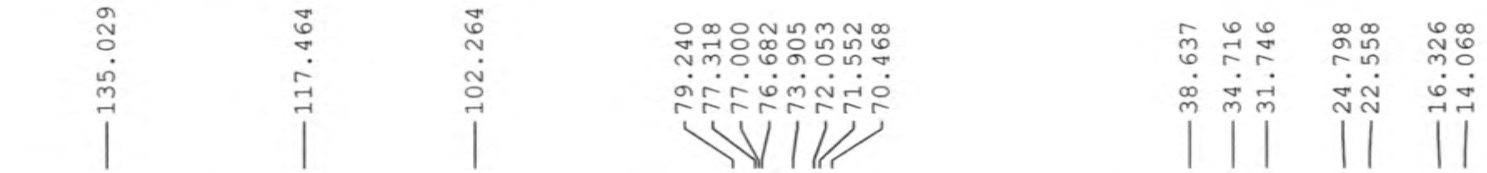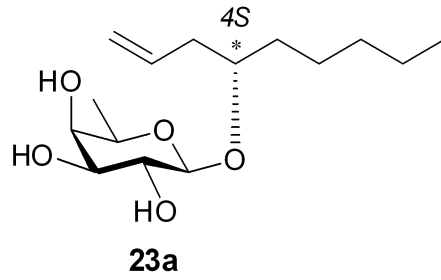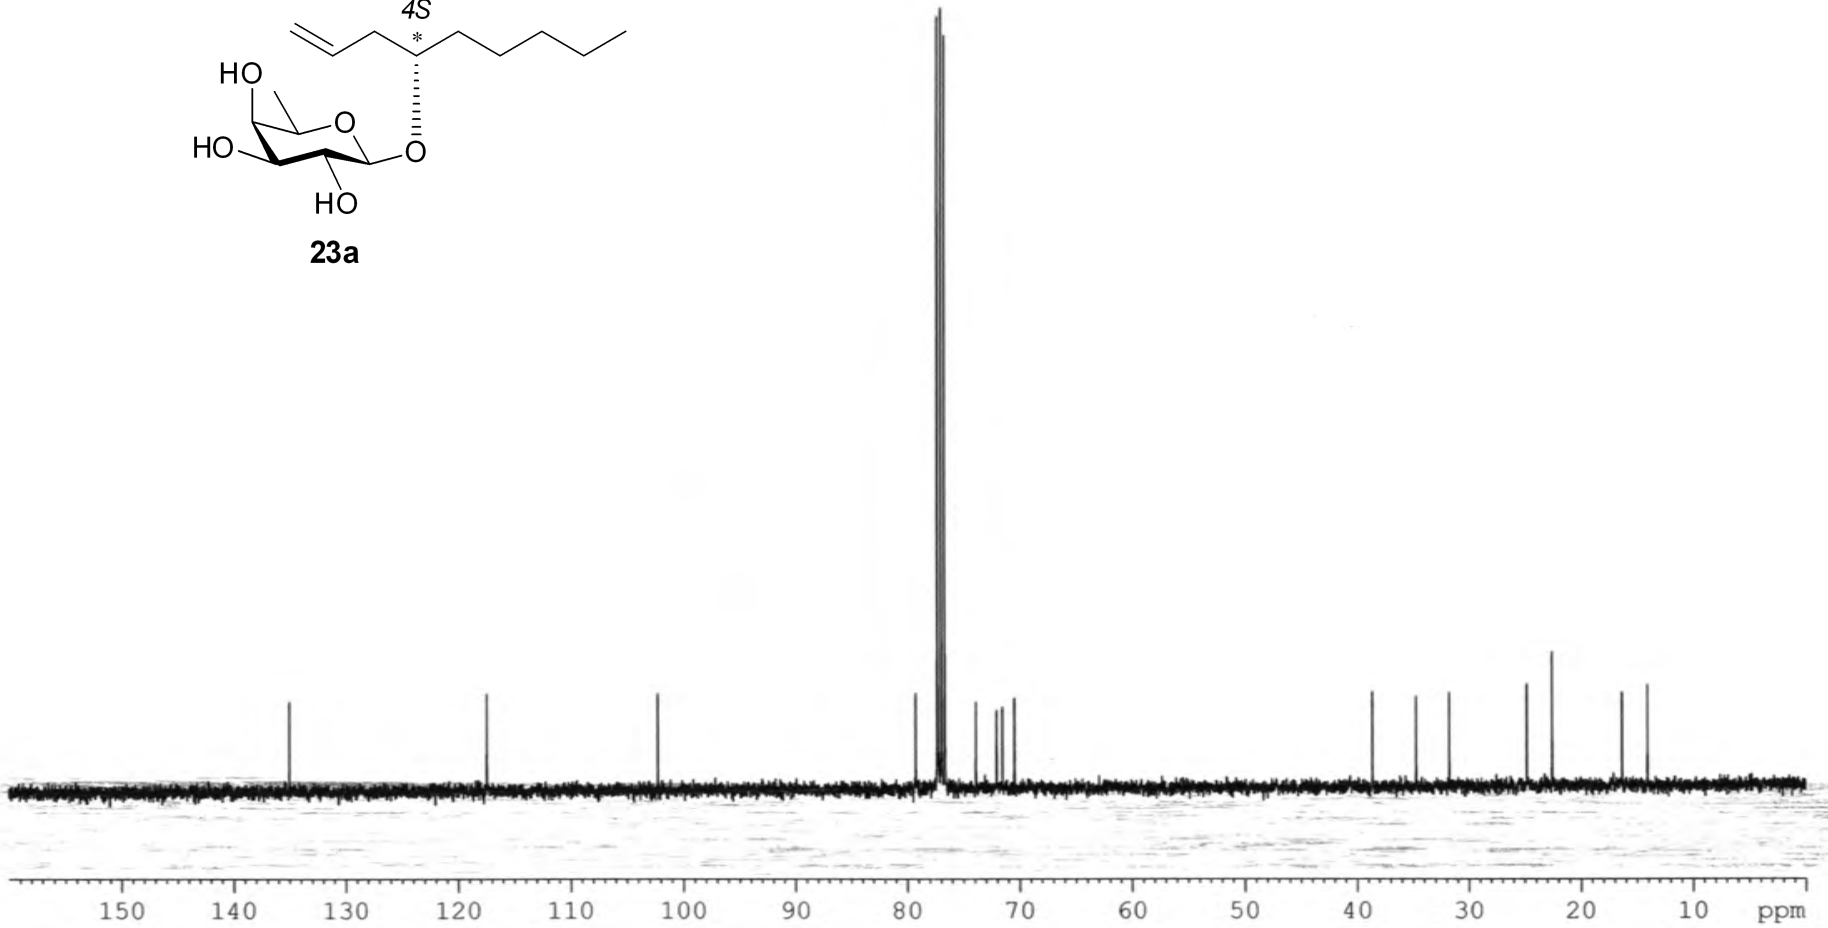

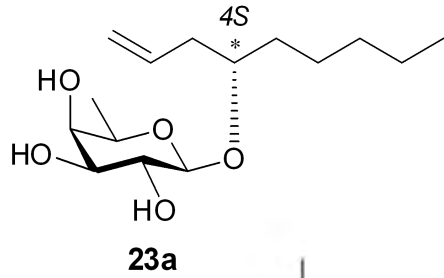ZGH-*Ipom*-1-176-A-131029 Check 150316 COSY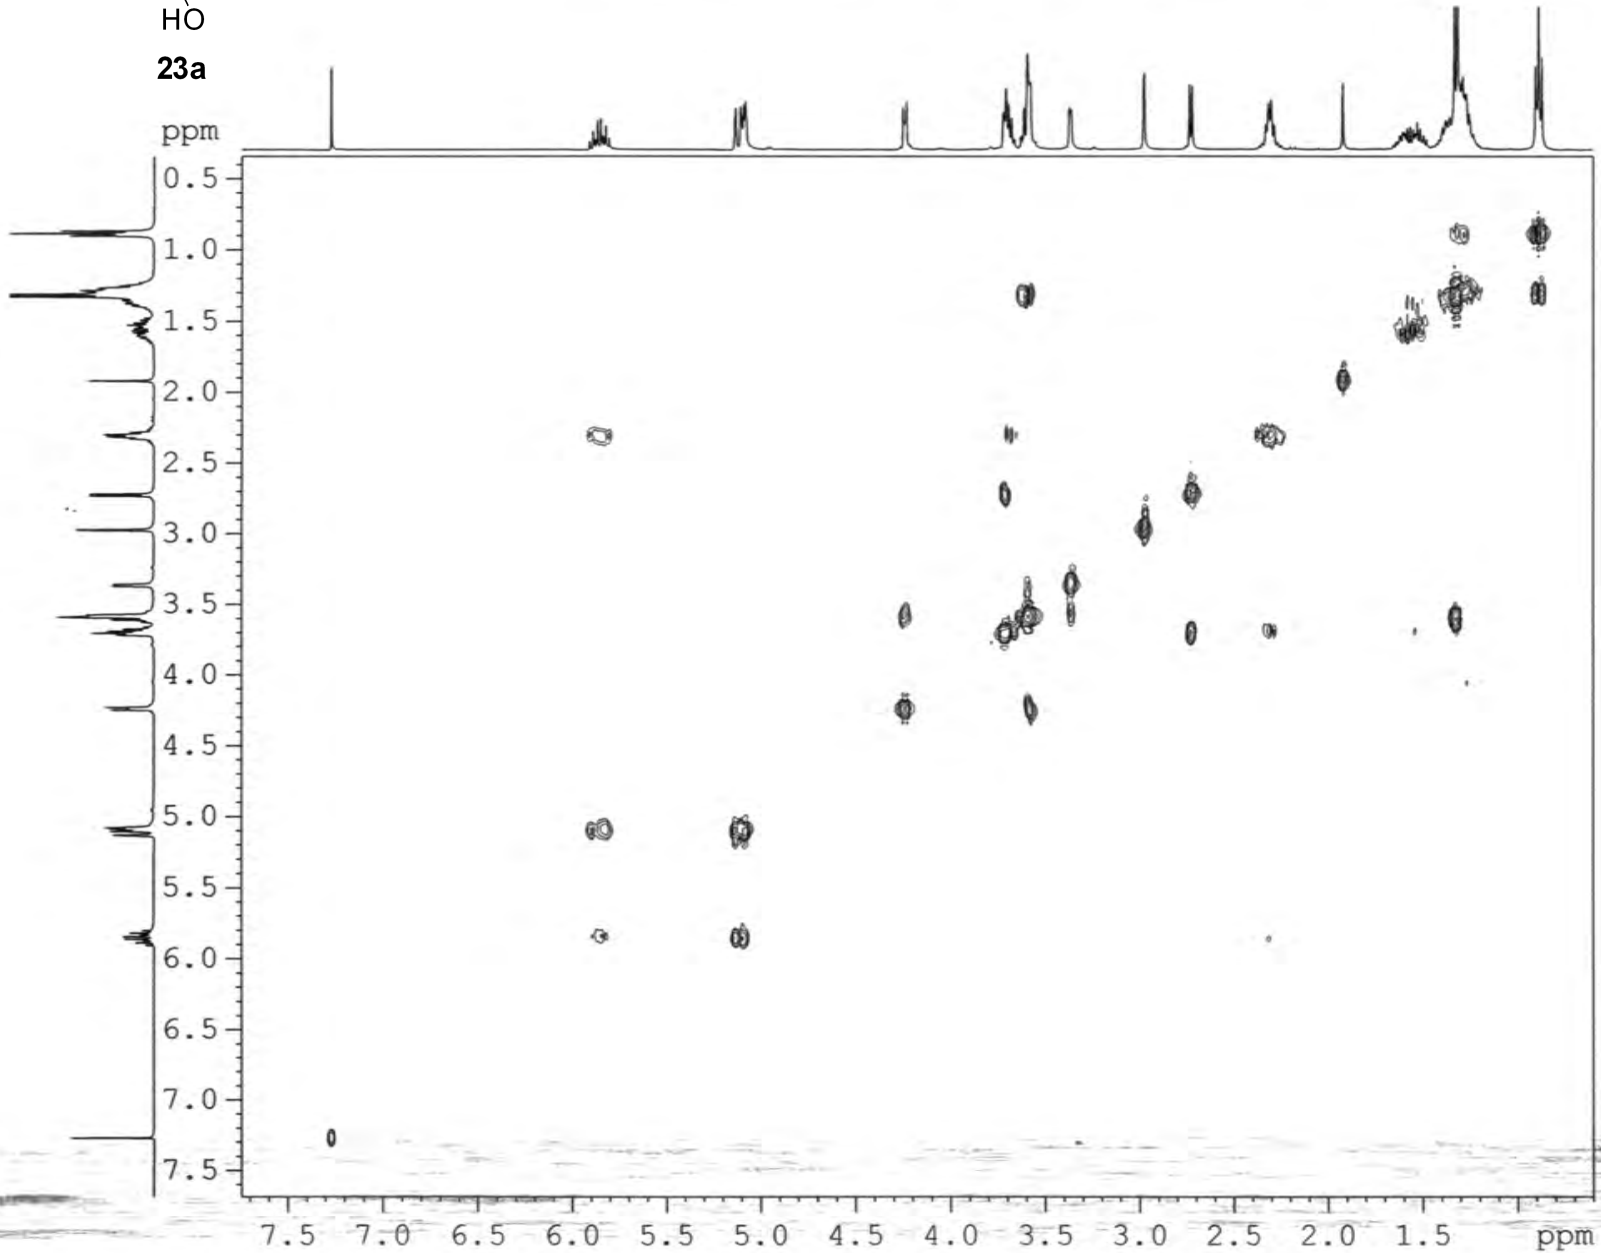

NAME ZGH-*Ipom*-1-176-A-131029  
 EXPNO 3  
 PROCNO 1  
 Date 20150316  
 Time 11.12  
 INSTRUM spect  
 PROBHD 5 mm PABBO BB-  
 PULPROG cosygpgf  
 TD 2048  
 SOLVENT CDC13  
 NS 2  
 DS 8  
 SWH 5341.880 Hz  
 FIDRES 2.608340 Hz  
 AQ 0.1917428 sec  
 RG 161  
 DW 93.600 usec  
 DE 6.50 usec  
 TE 292.6 K  
 DO 0.00000300 sec  
 D1 1.48689198 sec  
 D13 0.00000400 sec  
 D16 0.00020000 sec  
 INO 0.00018720 sec

===== CHANNEL f1 =====  
 NUC1 1H  
 P0 10.00 usec  
 P1 10.00 usec  
 PL1 -3.50 dB  
 PL1W 31.17620277 W  
 SF01 400.1324057 MHz

===== GRADIENT CHANNEL =====  
 GPNAM1 SINE.100  
 GPZ1 10.00 %  
 P16 1000.00 usec  
 ND0 1  
 TD 128  
 SF01 400.1324 MHz  
 FIDRES 41.733440 Hz  
 SW 13.350 ppm  
 FvMODE QF  
 SI 1024  
 SF 400.1300040 MHz  
 WDW SINE  
 SSB 0  
 LB 0.00 Hz  
 GB 0  
 PC 1.00  
 SI 1024  
 MC2 QF  
 SF 400.1300033 MHz  
 WDW SINE  
 SSB 0  
 LB 0.00 Hz  
 GB 0

EDB-Ipom-1-101-A-150515 in CDCL<sub>3</sub>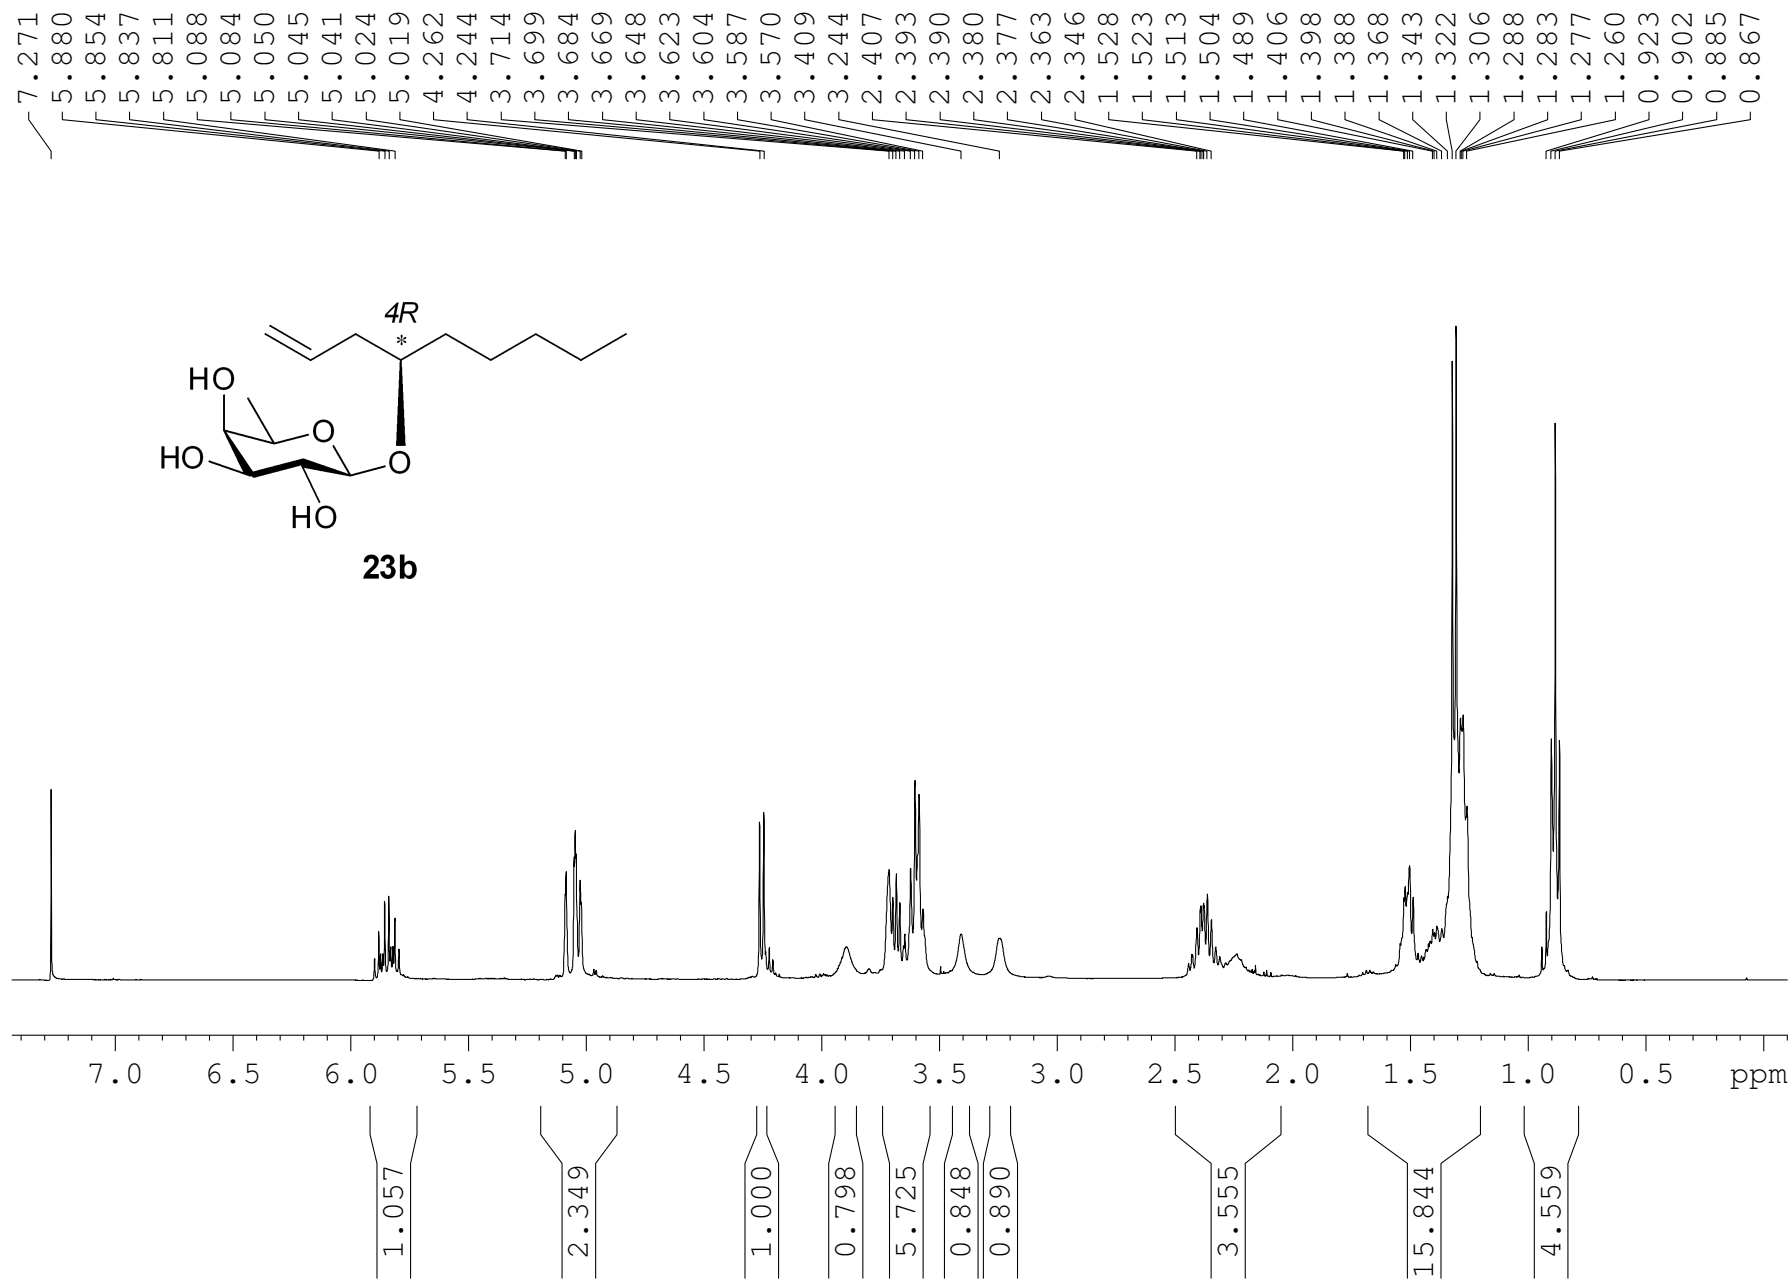

EDB-Ipom-1-101-A-150515  $^{13}\text{C}$  in  $\text{CDCl}_3$ 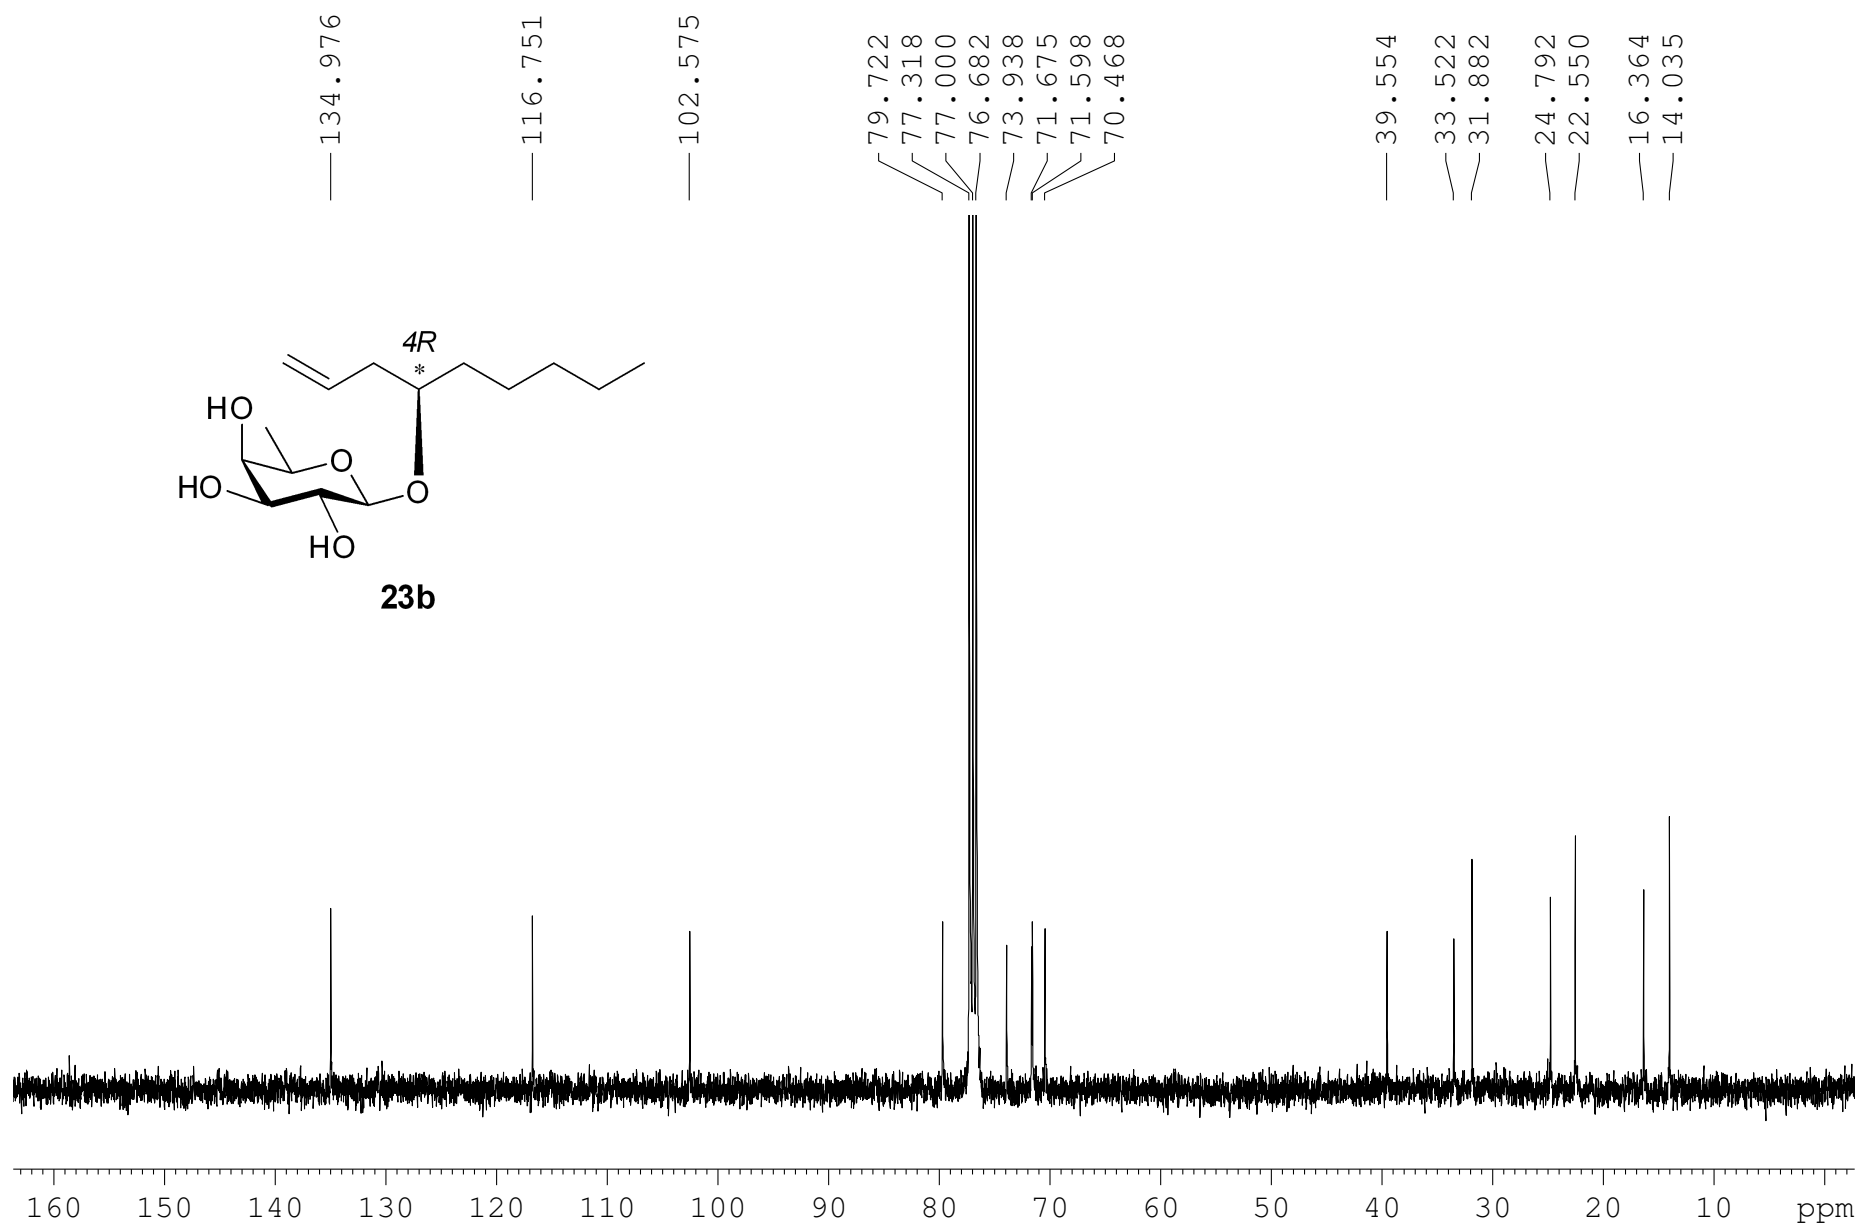

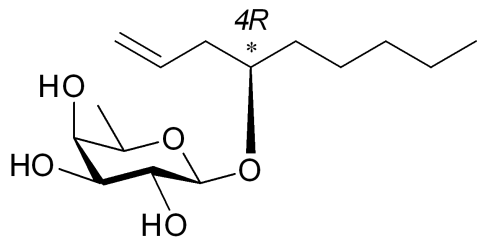EDB-*Ipom*-1-101-A-150515 COSY23b  
ppm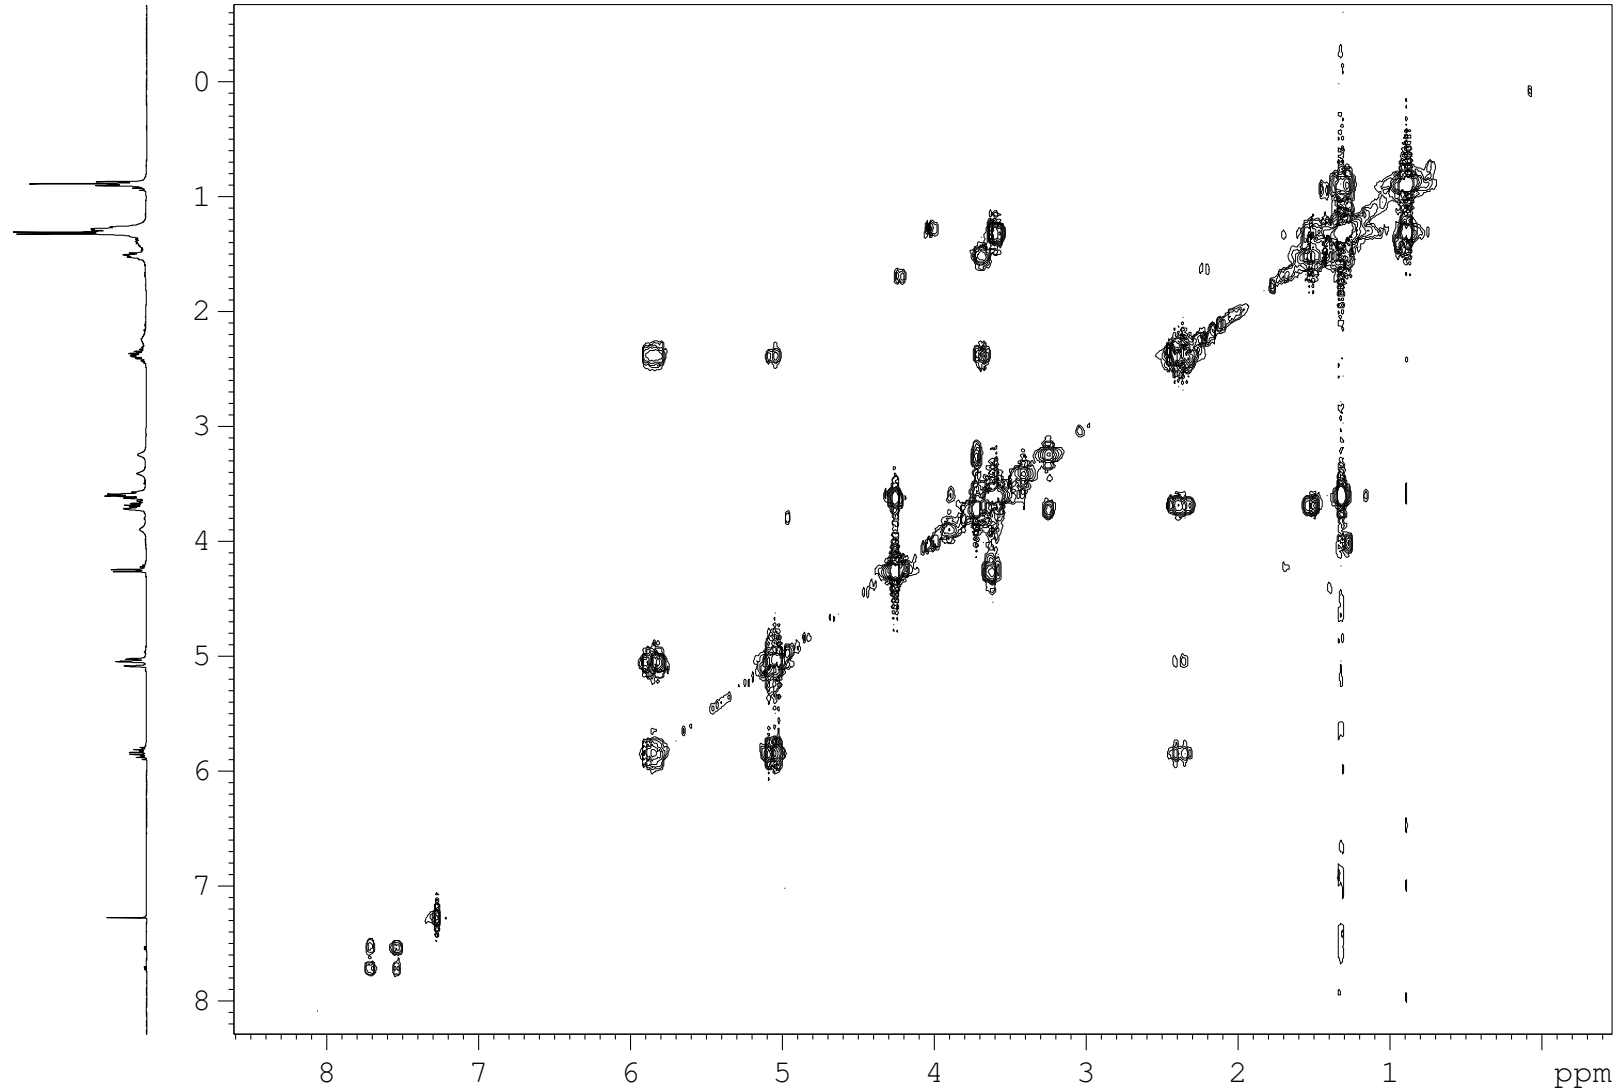

```

NAME      EDB-Ipom-1-101-A-150515
EXPNO     5
PROCNO    1
Date_     20150621
Time      19.22
INSTRUM   spect
PROBHD    5 mm PABBO BB-
PULPROG   cosygpgf
TD         2048
SOLVENT   CDCl3
NS         4
DS         8
SWH        5341.880 Hz
FIDRES     2.608340 Hz
AQ         0.1917428 sec
RG         80.6
DW         93.600 usec
DE         6.50 usec
TE         292.3 K
D0         0.00000300 sec
D1         1.48689198 sec
D13        0.00000400 sec
D16        0.00020000 sec
INO        0.00018720 sec
  
```

```

===== CHANNEL f1 =====
NUC1      1H
P0         10.00 usec
P1         10.00 usec
PL1        -3.50 dB
PL1W       31.17620277 W
SF01      400.1324057 MHz
  
```

```

===== GRADIENT CHANNEL =====
GPNAM1    SINE.100
GPZ1      10.00 %
P16       1000.00 usec
ND0        1
TD         128
SF01      400.1324 MHz
FIDRES    41.733440 Hz
SW         13.350 ppm
FnMODE     QF
SI         1024
SF         400.1300040 MHz
WDW        SINE
SSB         0
LB         0.00 Hz
GB         0
PC         1.00
SI         1024
MC2        QF
SF         400.1300033 MHz
WDW        SINE
SSB         0
LB         0.00 Hz
GB         0
  
```

ZGH-*Ipom*-2-24-A-150108 1H in CDCl<sub>3</sub>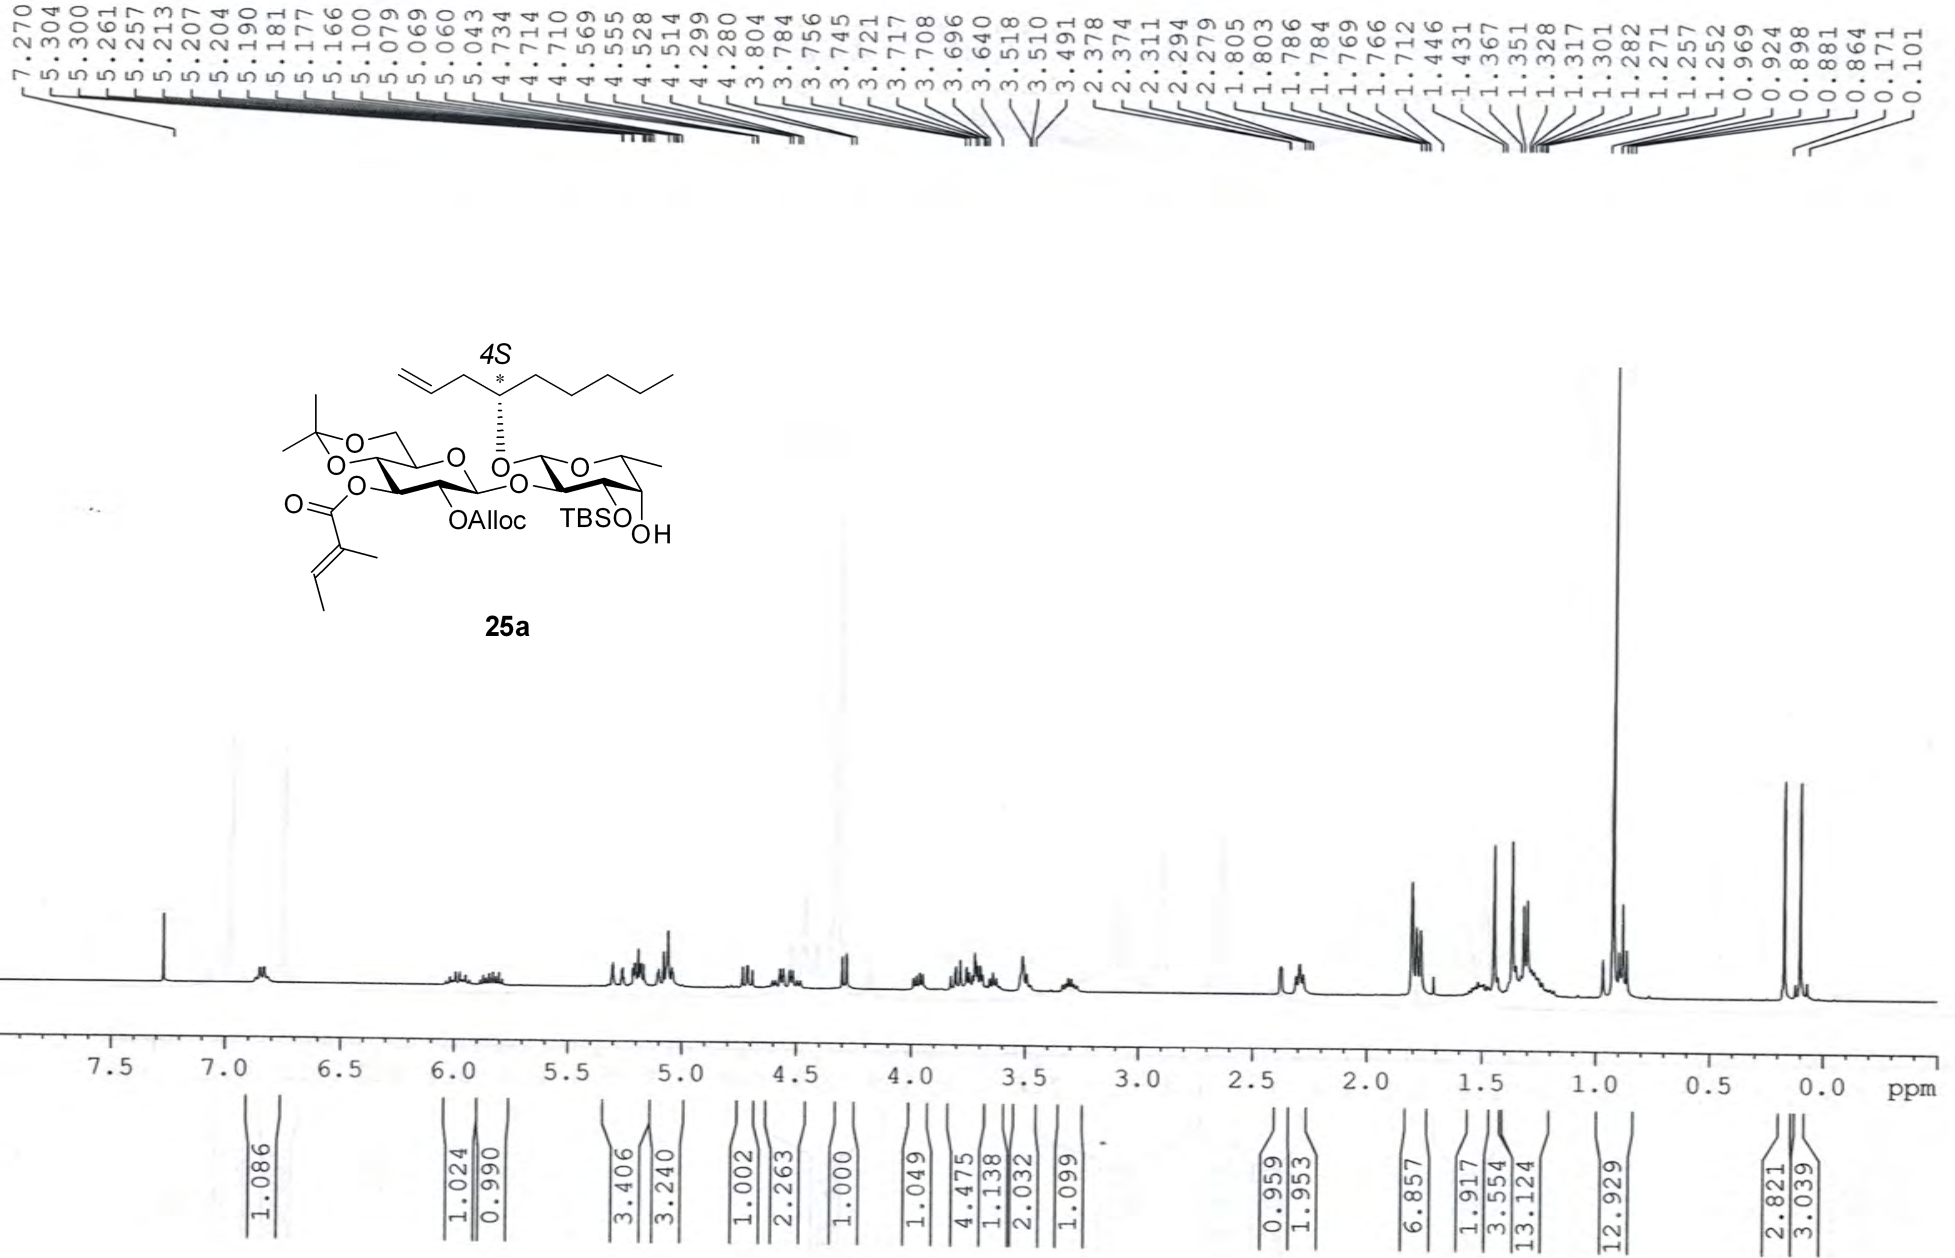

ZGH-Ipom-2-24-A-150108 13C in CDCl3

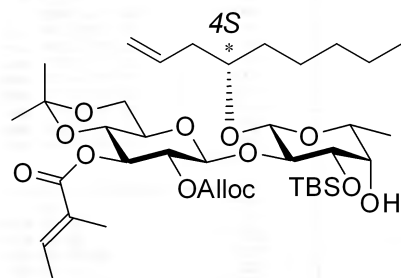

25a

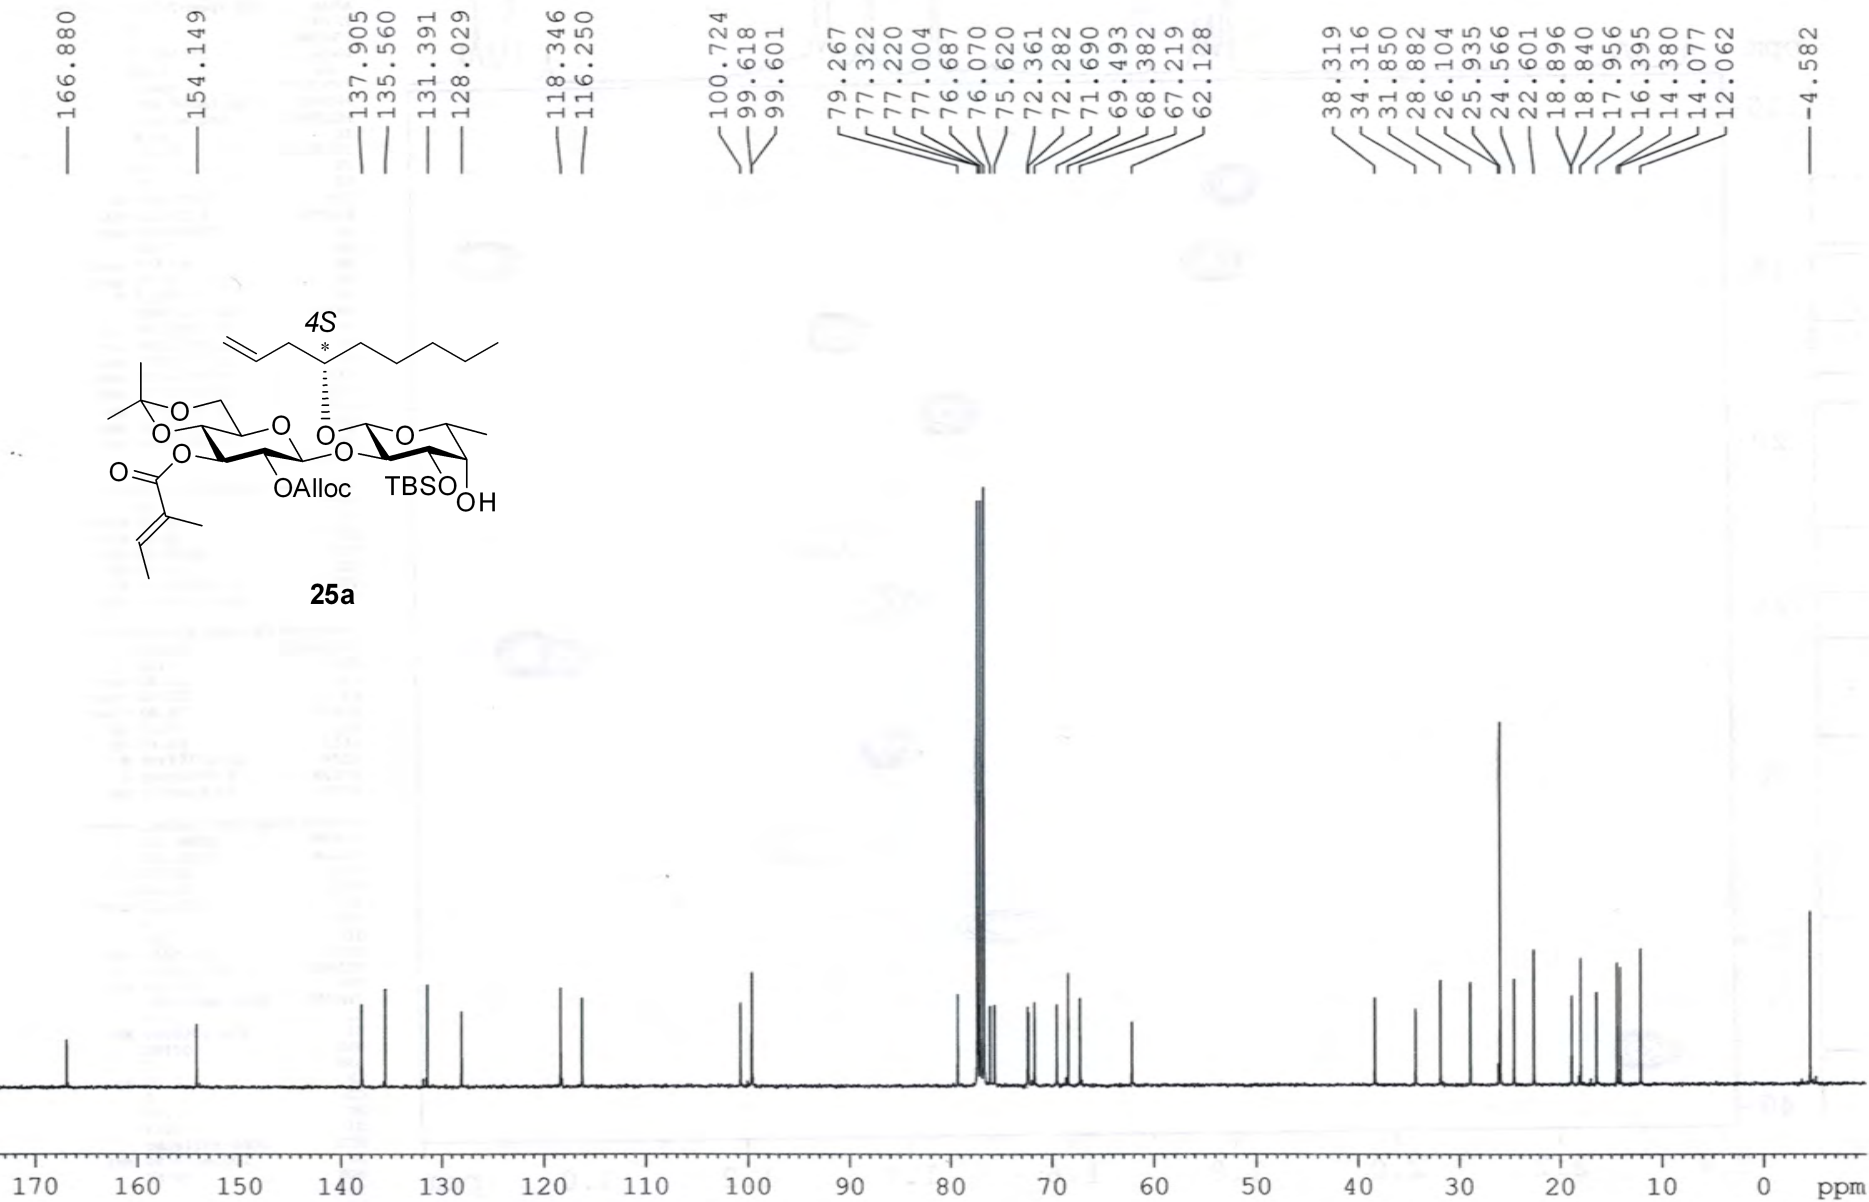

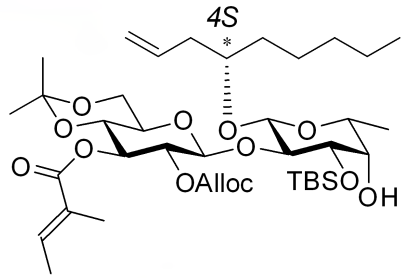

ZGH-Ipom-2-24-A-150108 COSY

25a

ppm

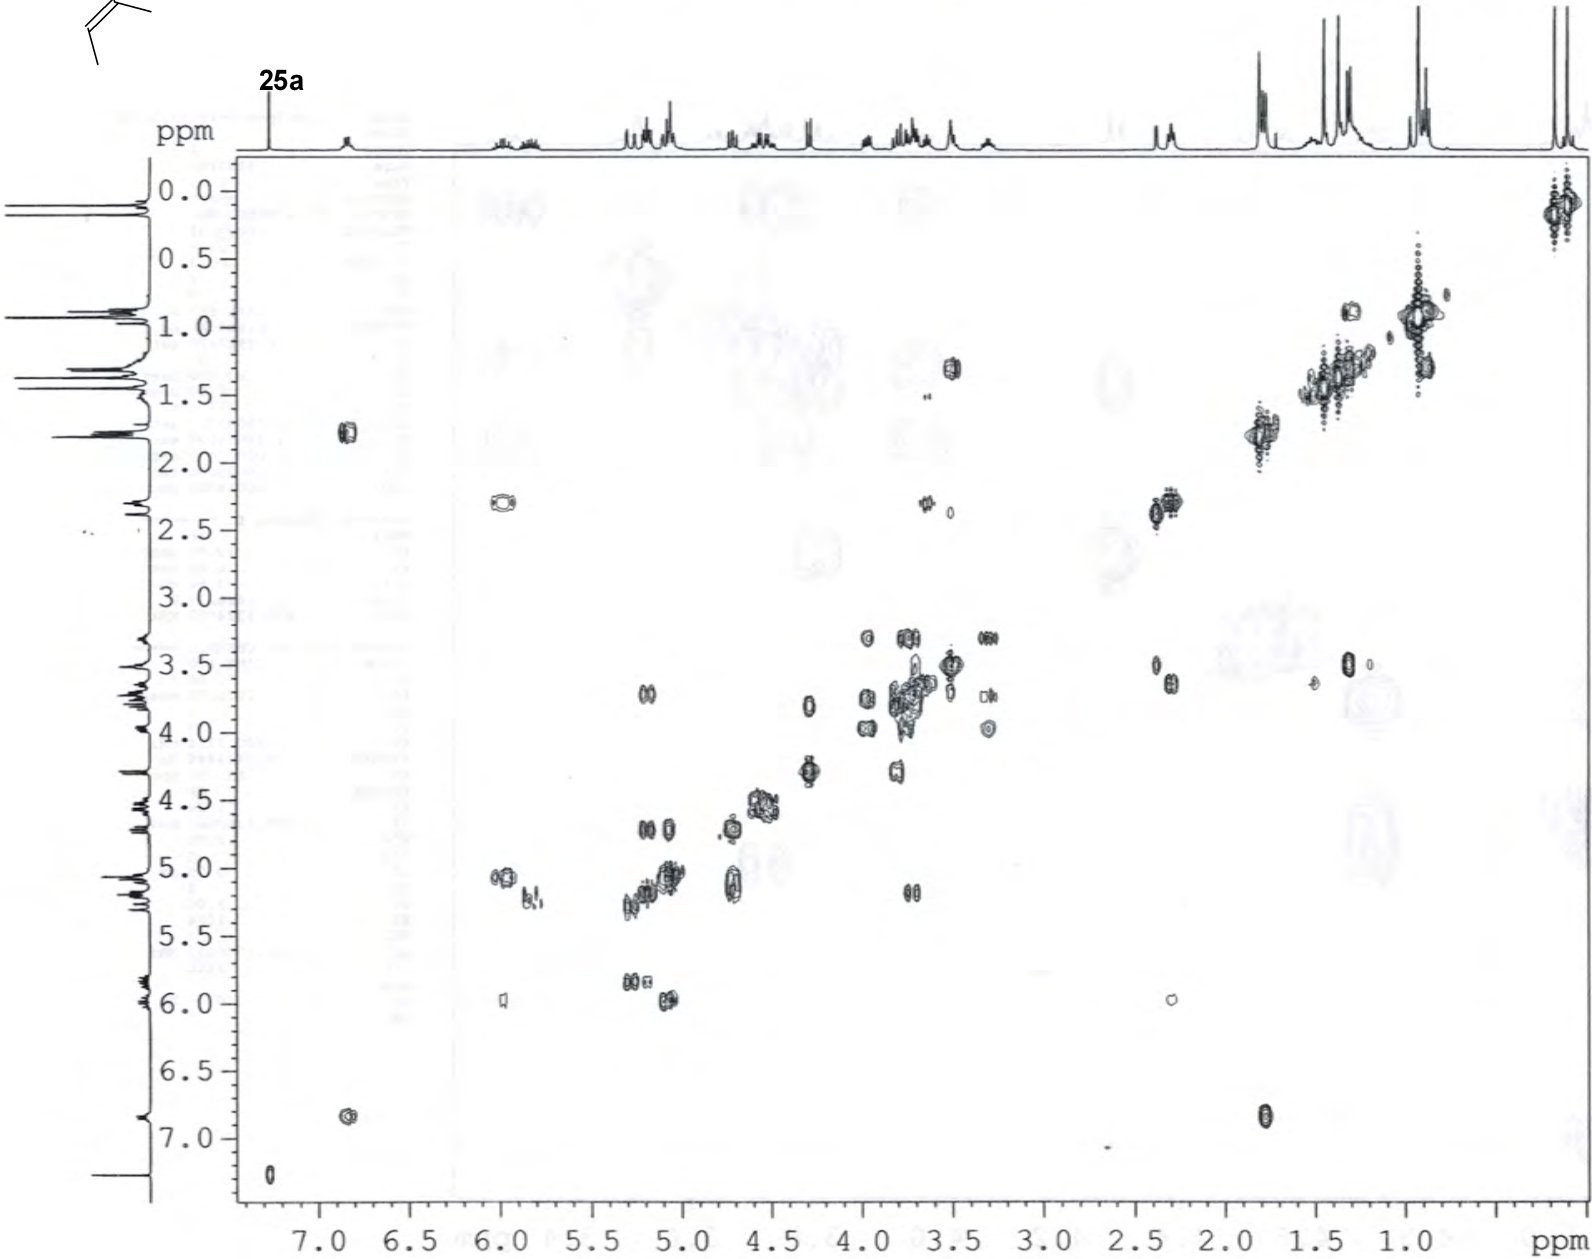

NAME ZGH-Ipom-2-24-A-150108  
 EXPNO 2  
 PROCNO 1  
 Date\_ 20150109  
 Time 2.21  
 INSTRUM spect  
 PROBHD 5 mm PABBO BB-  
 PULPROG cosyppqf  
 TD 2048  
 SOLVENT CDC13  
 NS 4  
 DS 8  
 SWH 5341.880 Hz  
 FIDRES 2.608340 Hz  
 AQ 0.1917428 sec  
 RG 57  
 DW 93.600 usec  
 DE 6.50 usec  
 TE 292.4 K  
 D0 0.00000300 sec  
 D1 1.48689198 sec  
 D13 0.00000400 sec  
 D16 0.00020000 sec  
 INO 0.00018720 sec

===== CHANNEL f1 =====  
 NUC1 1H  
 P0 10.00 usec  
 P1 10.00 usec  
 PL1 -3.50 dB  
 PL1W 31.17620277 W  
 SFO1 400.1324057 MHz

===== GRADIENT CHANNEL =====  
 GPNAM1 SINE.100  
 GP21 10.00 %  
 P16 1000.00 usec  
 ND0 1  
 TD 128  
 SFO1 400.1324 MHz  
 FIDRES 41.733440 Hz  
 SW 13.350 ppm  
 FmMODE QF  
 SI 1024  
 SF 400.1300040 MHz  
 WDW SINE  
 SSB 0  
 LB 0.00 Hz  
 GB 0  
 PC 1.00  
 SI 1024  
 MC2 QF  
 SF 400.1300033 MHz  
 WDW SINE  
 SSB 0  
 LB 0.00 Hz  
 GB 0

ppm



## ZGH-Ipom-2-24-A-150108 HSQC

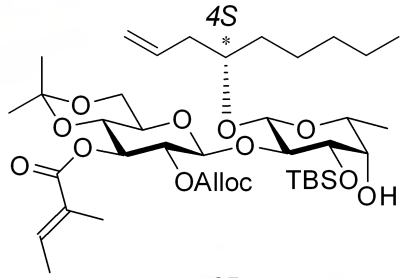

NAME ZGH-Ipom-2-24-A-150108  
 EXPNO 4  
 PROCNO 1  
 Date 20150109  
 Time 4.28  
 INSTRUM spect  
 PROBHD 5 mm PABBO BB-  
 PULPROG hsqcetgpsi  
 TD 1024  
 SOLVENT CDCl3  
 NS 8  
 DS 16  
 SWH 5341.880 Hz  
 FIDRES 5.216680 Hz  
 AQ 0.0958964 sec  
 RG 2050  
 DW 93.600 usec  
 DE 6.50 usec  
 TE 292.9 K  
 CNST2 145.0000000  
 D0 0.00000300 sec  
 D1 1.50000000 sec  
 D4 0.00172414 sec  
 D11 0.03000000 sec  
 D13 0.00000400 sec  
 D16 0.00020000 sec  
 D24 0.00110000 sec  
 IN0 0.00003000 sec  
 ZGOPTNS

===== CHANNEL f1 =====  
 NUC1 1H  
 P1 10.00 usec  
 P2 20.00 usec  
 P28 1000.00 usec  
 PL1 -3.50 dB  
 PL1W 31.17620277 W  
 SFO1 400.1324057 MHz

===== CHANNEL f2 =====  
 CPDPRG2 garp  
 NUC2 13C  
 P3 10.00 usec  
 P4 20.00 usec  
 PCPD2 75.00 usec  
 PL2 -2.10 dB  
 PL12 15.40 dB  
 PL2W 58.37759399 W  
 PL12W 1.03811681 W  
 SFO2 100.6202727 MHz

===== GRADIENT CHANNEL =====  
 GPNAM1 SINE.100  
 GPNAM2 SINE.100  
 GPZ1 80.00 %  
 GPZ2 20.10 %  
 P16 1000.00 usec  
 ND0 2  
 TD 256  
 SFO1 100.6203 MHz  
 FIDRES 65.104164 Hz  
 SW 165.639 ppm  
 FMODE Echo-Antiecho  
 S1 1024  
 SF 400.1300000 MHz  
 WDW QSINE  
 SSB 2  
 LB 0.00 Hz  
 GB 0  
 FC 1.00  
 SI 1024  
 MC2 echo-antiecho  
 SF 100.6127690 MHz  
 WDW QSINE  
 SSB 2  
 LB 0.00 Hz  
 GR ^

25a

ppm

0

20

40

60

80

100

120

140

7

6

5

4

3

2

1

ppm

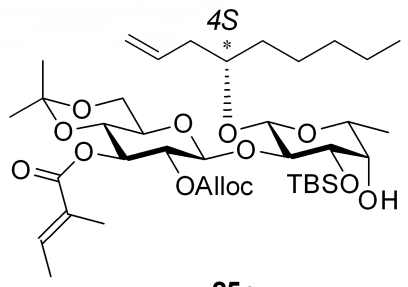

ZGH-*Ipom*-2-24-A-150108 HMBC in CDCL<sub>3</sub>

25a

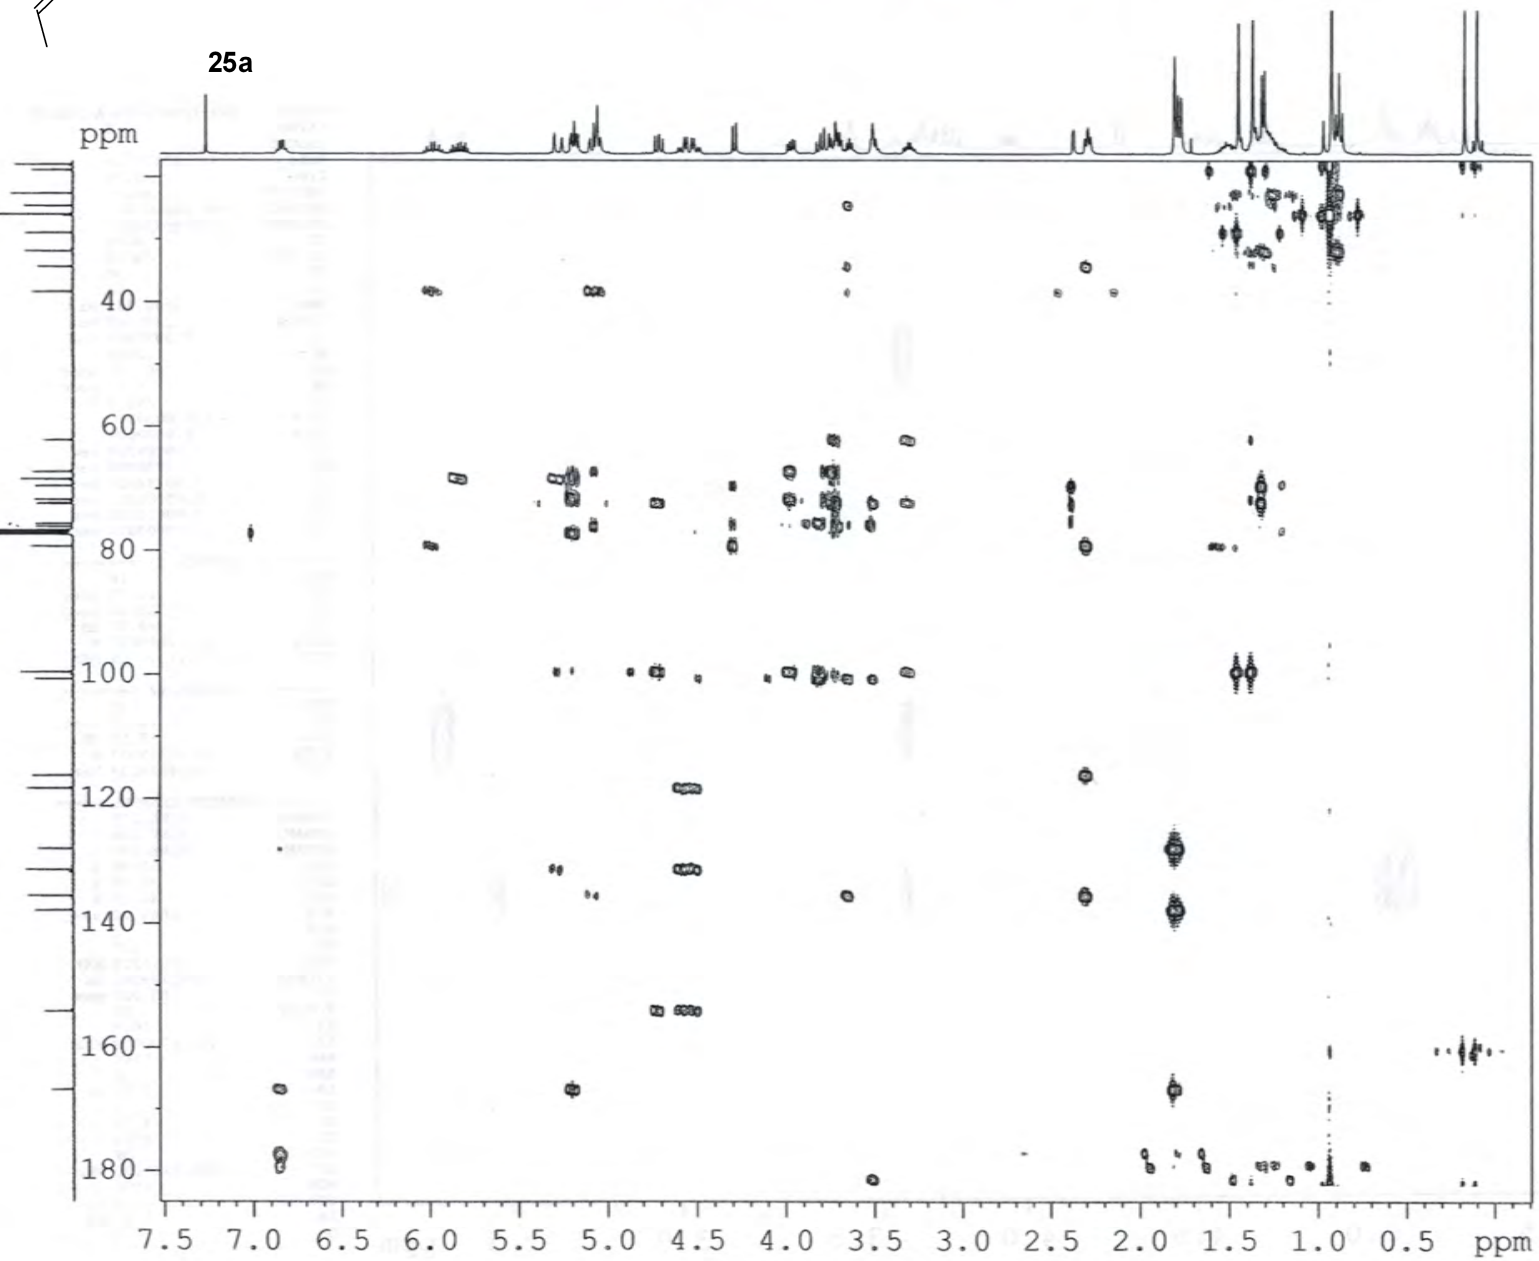

NAME ZGH-*Ipom*-2-24-A-150108  
EXPNO 5  
PROCNO 1  
Date\_ 20150109  
Time\_ 5.24  
INSTRUM spect  
PROBHD 5 mm PABBO BB-  
PULPROG hmbcgp1pdqf  
TD 4096  
SOLVENT CDCl<sub>3</sub>  
NS 30  
DS 16  
SWH 5208.333 Hz  
FIDRES 1.271566 Hz  
AQ 0.3932660 sec  
RG 2050  
DW 96.000 usec  
DE 6.50 usec  
TE 292.4 K  
CNST2 145.0000000  
CNST13 10.0000000  
D0 0.000003000 sec  
D1 1.500000000 sec  
D2 0.00344828 sec  
D6 0.050000000 sec  
D16 0.000200000 sec  
IN0 0.00003010 sec

===== CHANNEL f1 =====  
NUC1 1H  
P1 10.00 usec  
P2 20.00 usec  
PL1 -3.50 dB  
PL1W 31.17620277 W  
SFO1 400.1325208 MHz

===== CHANNEL f2 =====  
NUC2 13C  
P3 10.00 usec  
PL2 -2.10 dB  
PL2W 58.37759399 W  
SFO2 100.6228138 MHz

===== GRADIENT CHANNEL =====  
GPNAM1 SINE.100  
GPNAM2 SINE.100  
GPNAM3 SINE.100  
GPZ1 50.00 %  
GPZ2 30.00 %  
GPZ3 40.10 %  
P16 1000.00 usec  
ND0 2  
TD 128  
SFO1 100.6228 MHz  
FIDRES 129.709091 Hz  
SW 165.000 ppm  
FnMODE QF  
SI 2048  
SF 400.1300000 MHz  
WDW SINE  
SSB 0  
LB 0.00 Hz  
GB 0  
PC 4.00  
SI 1024  
MC2 QF  
SF 100.6127690 MHz  
WDW SINE  
SSB 0  
LB 0.00 Hz  
GB 0

EDB-Ipom-1-111-A-150605 in CDCL<sub>3</sub>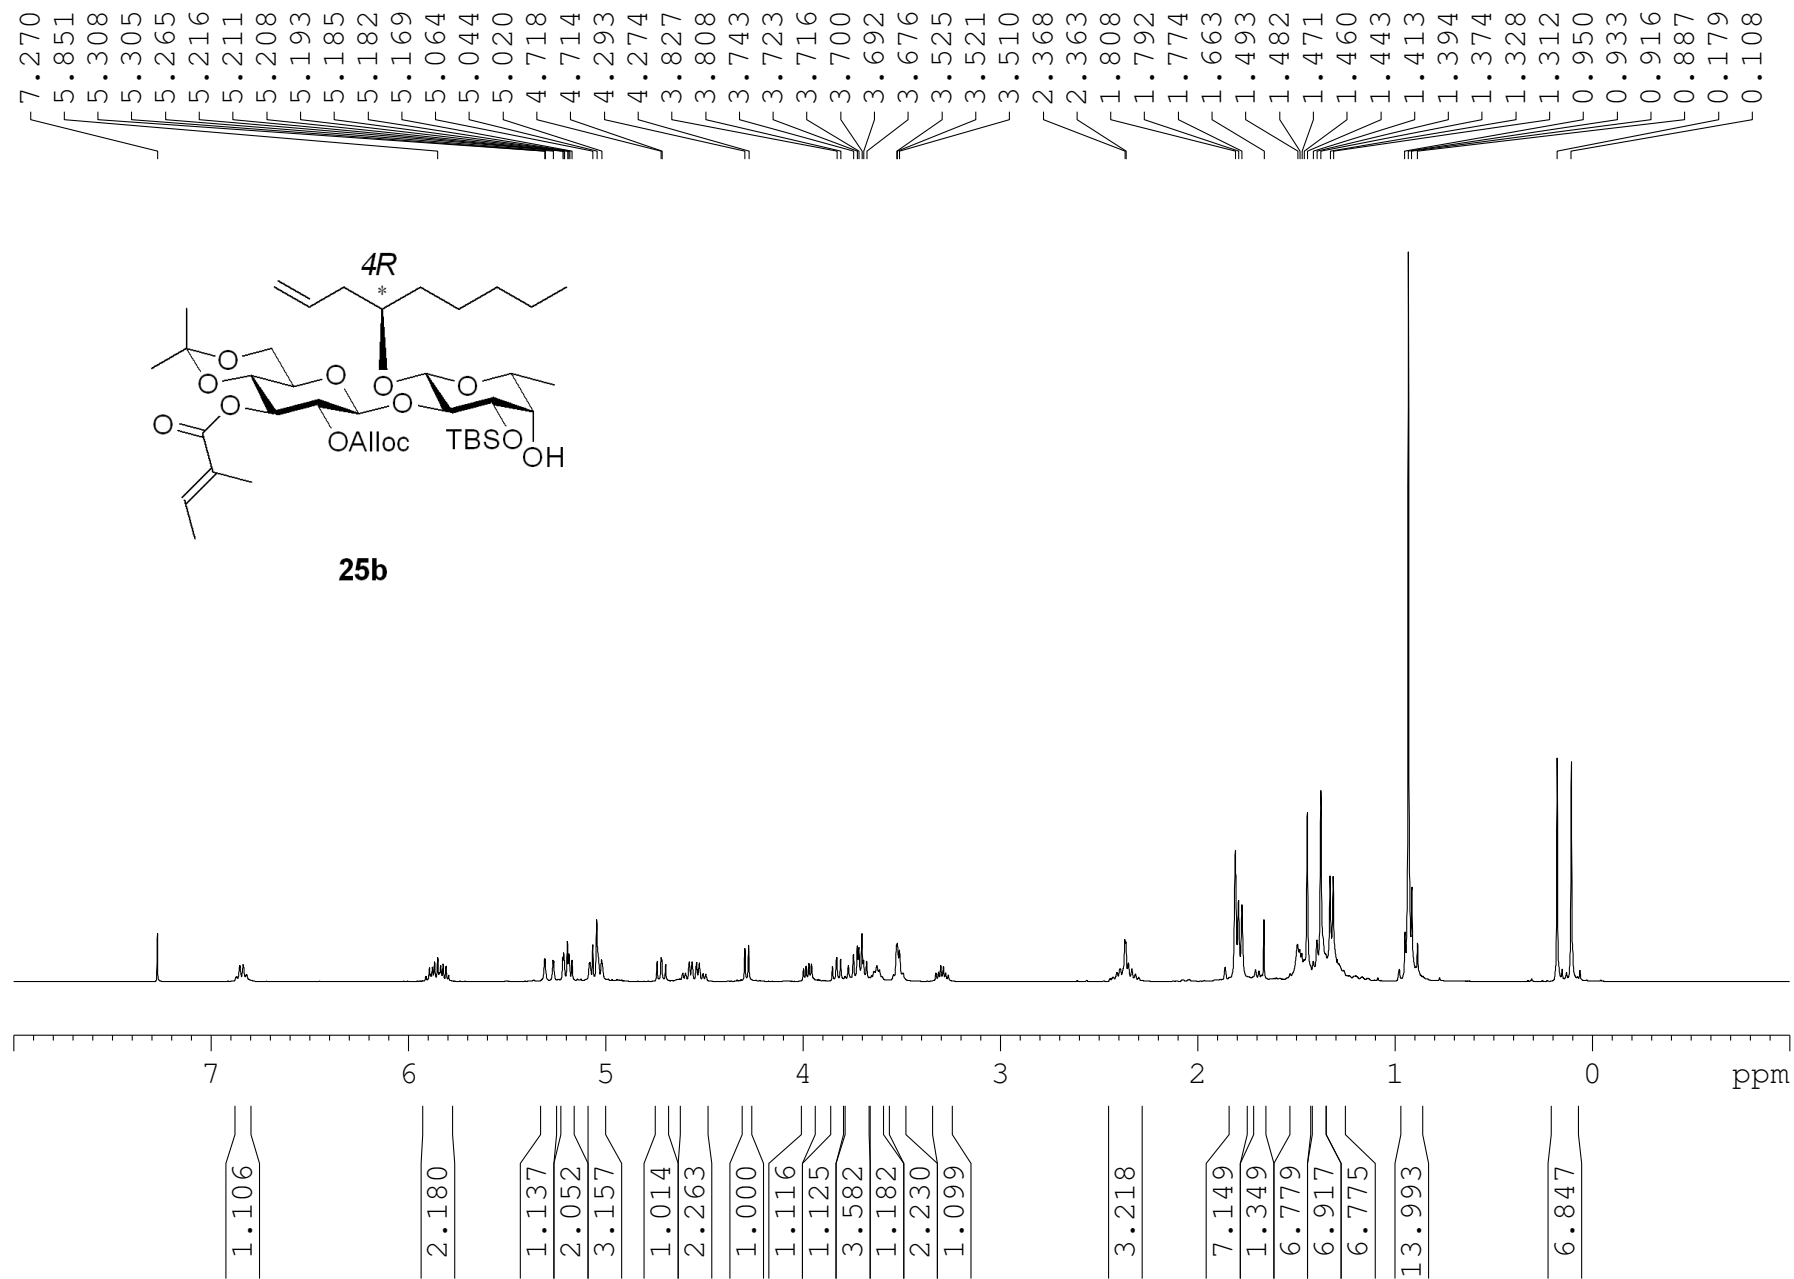

## EDB-Ipom-1-111-A-150605 13C in CDCl3

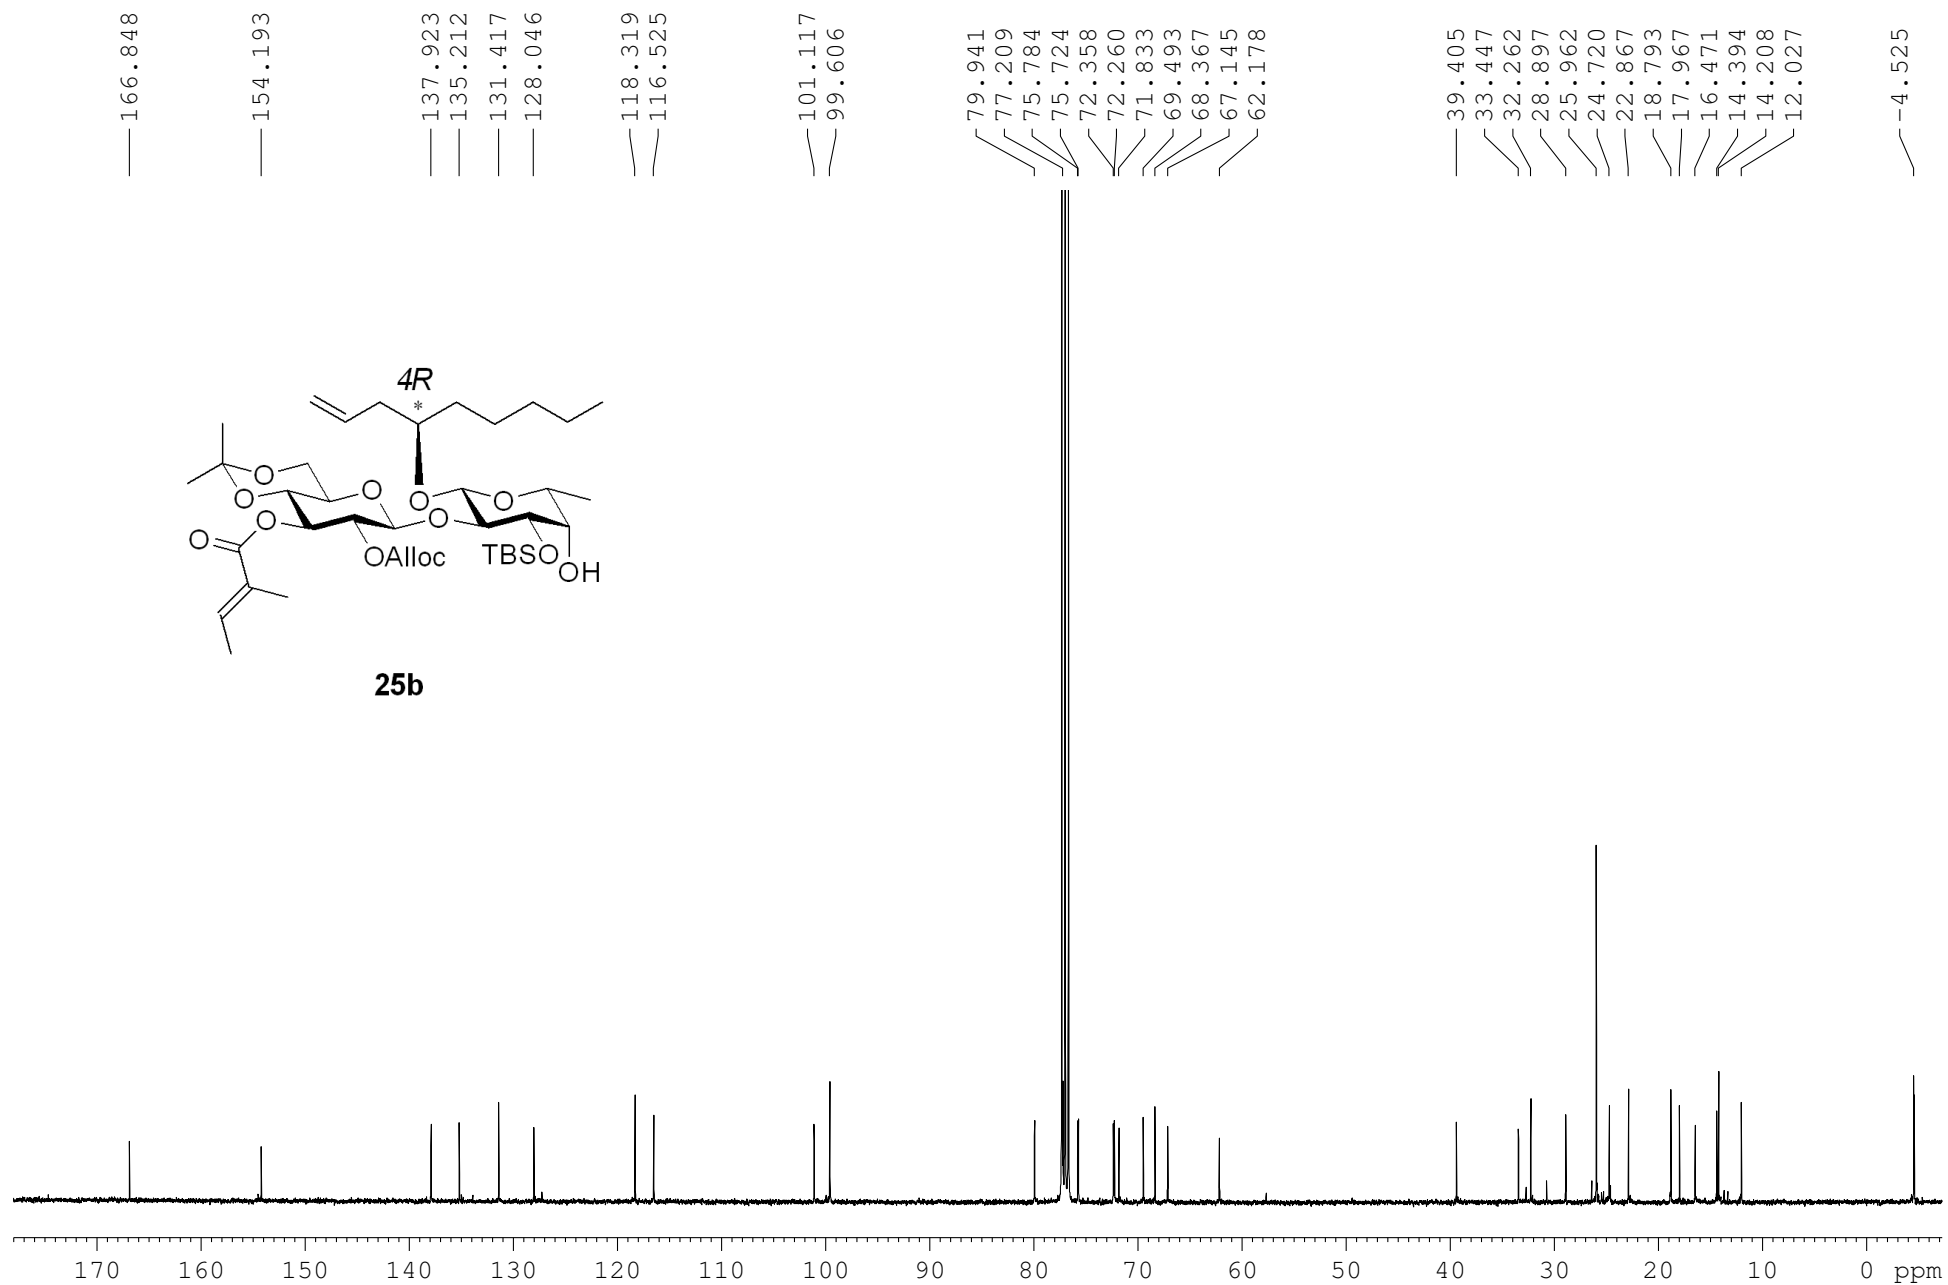

ZGH-*Ipom*-1-169-A 1H in CDCl<sub>3</sub>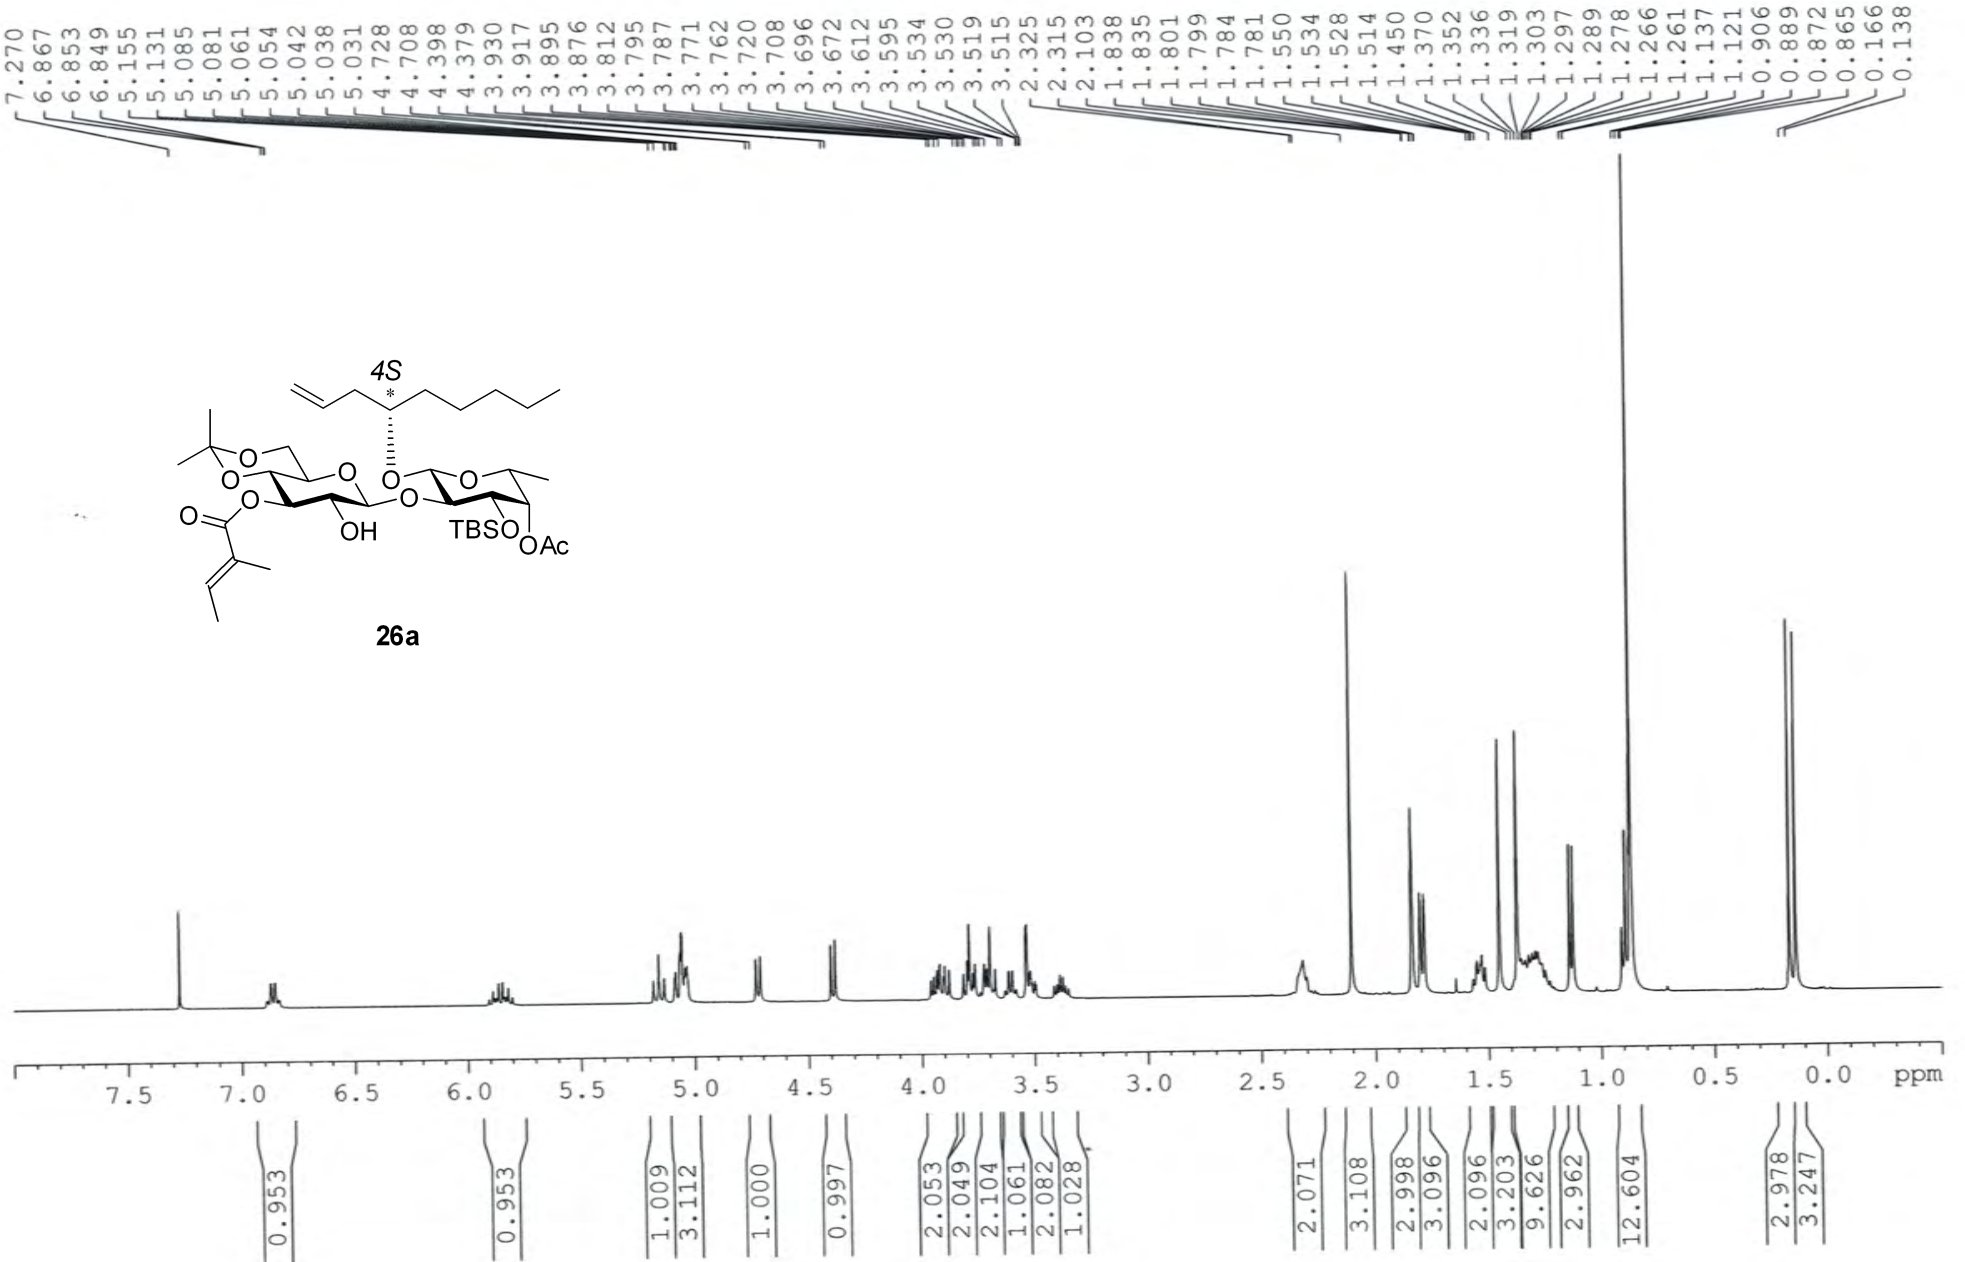

ZGH-*Ipom-1-169-A* 13C in CDCl<sub>3</sub>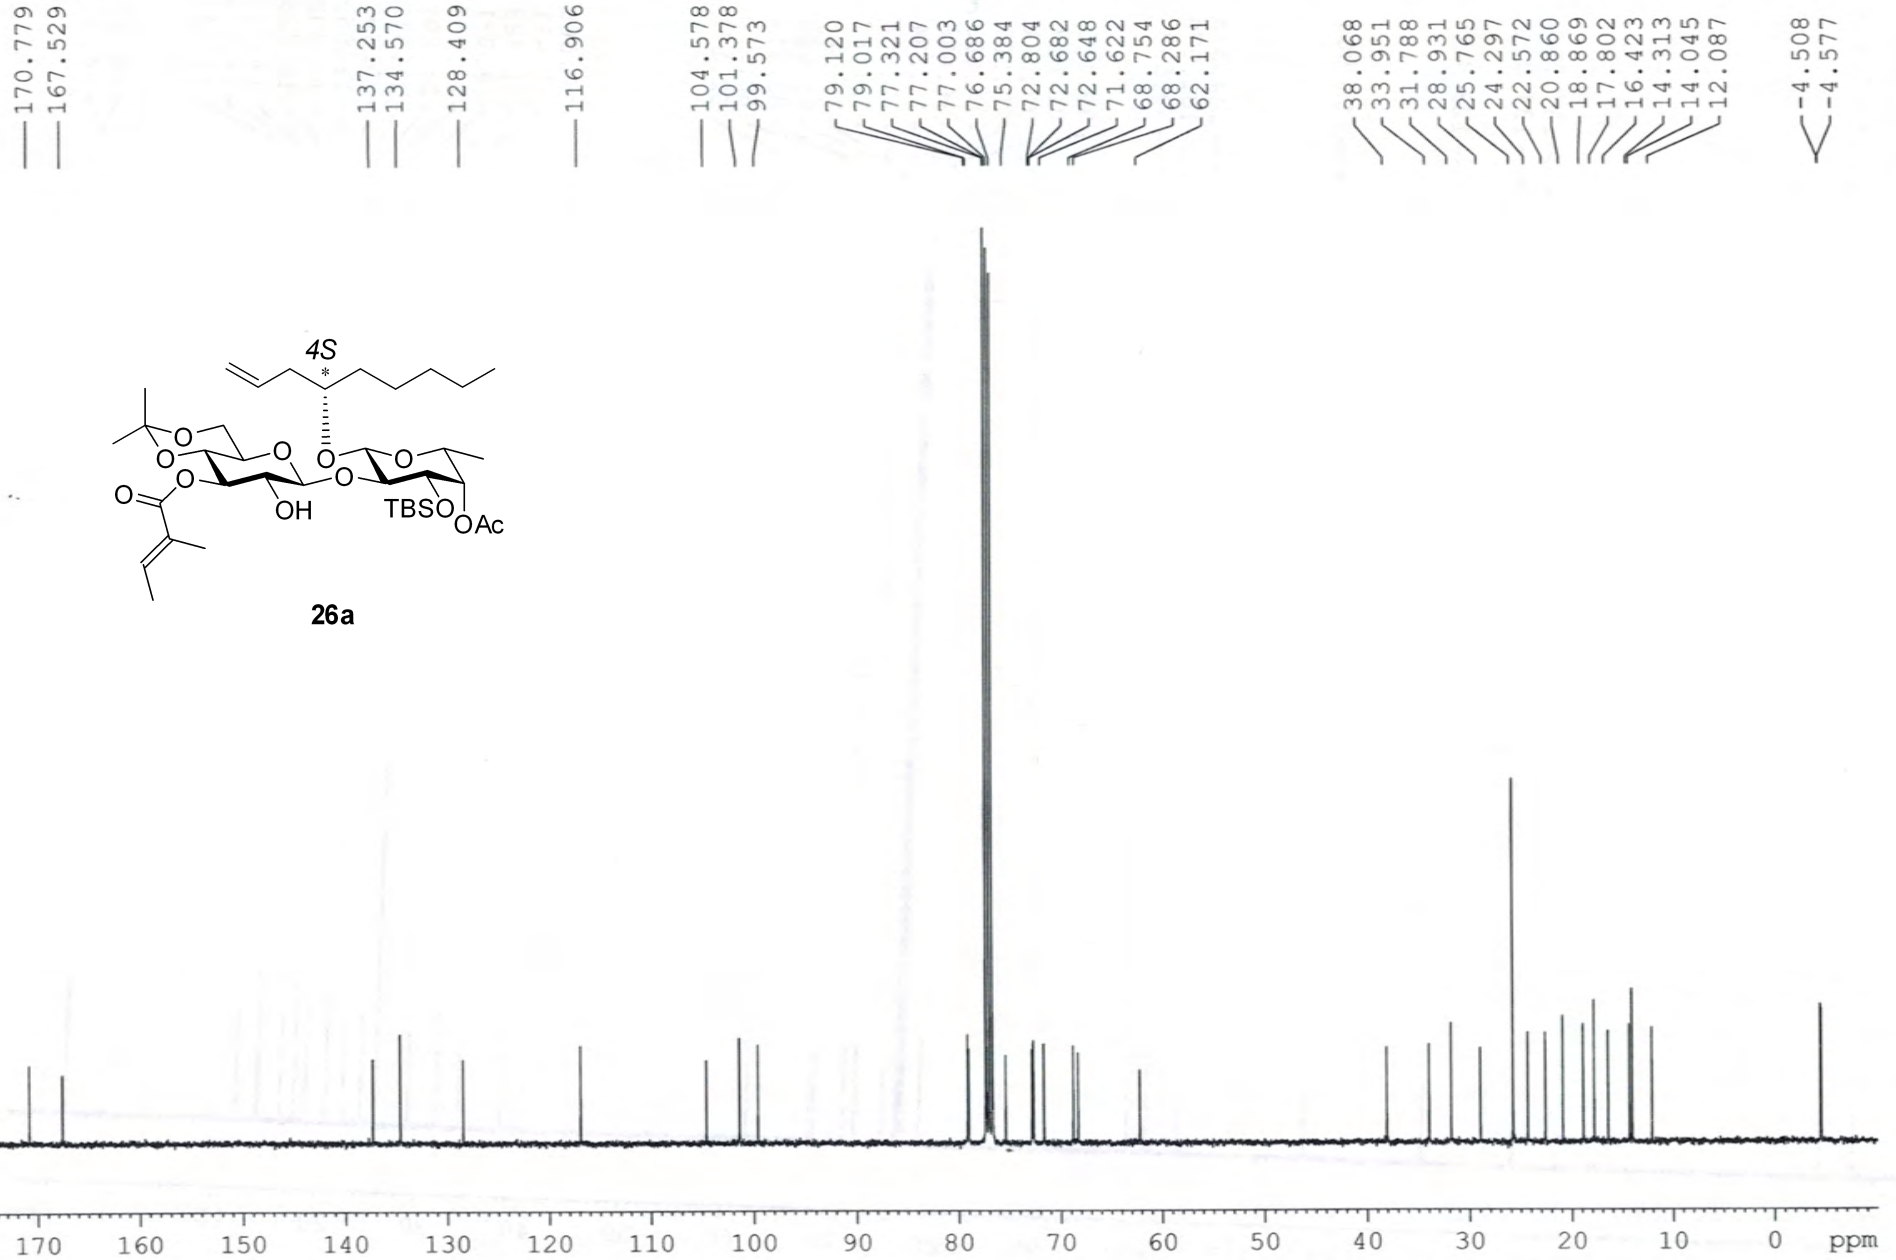

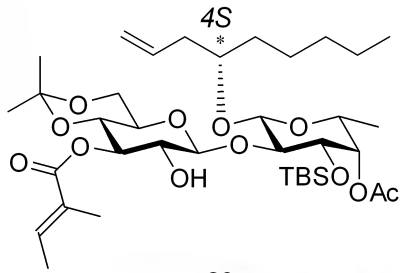

ZGH-Ipom-1-169-A-150130 COSY

26a

ppm

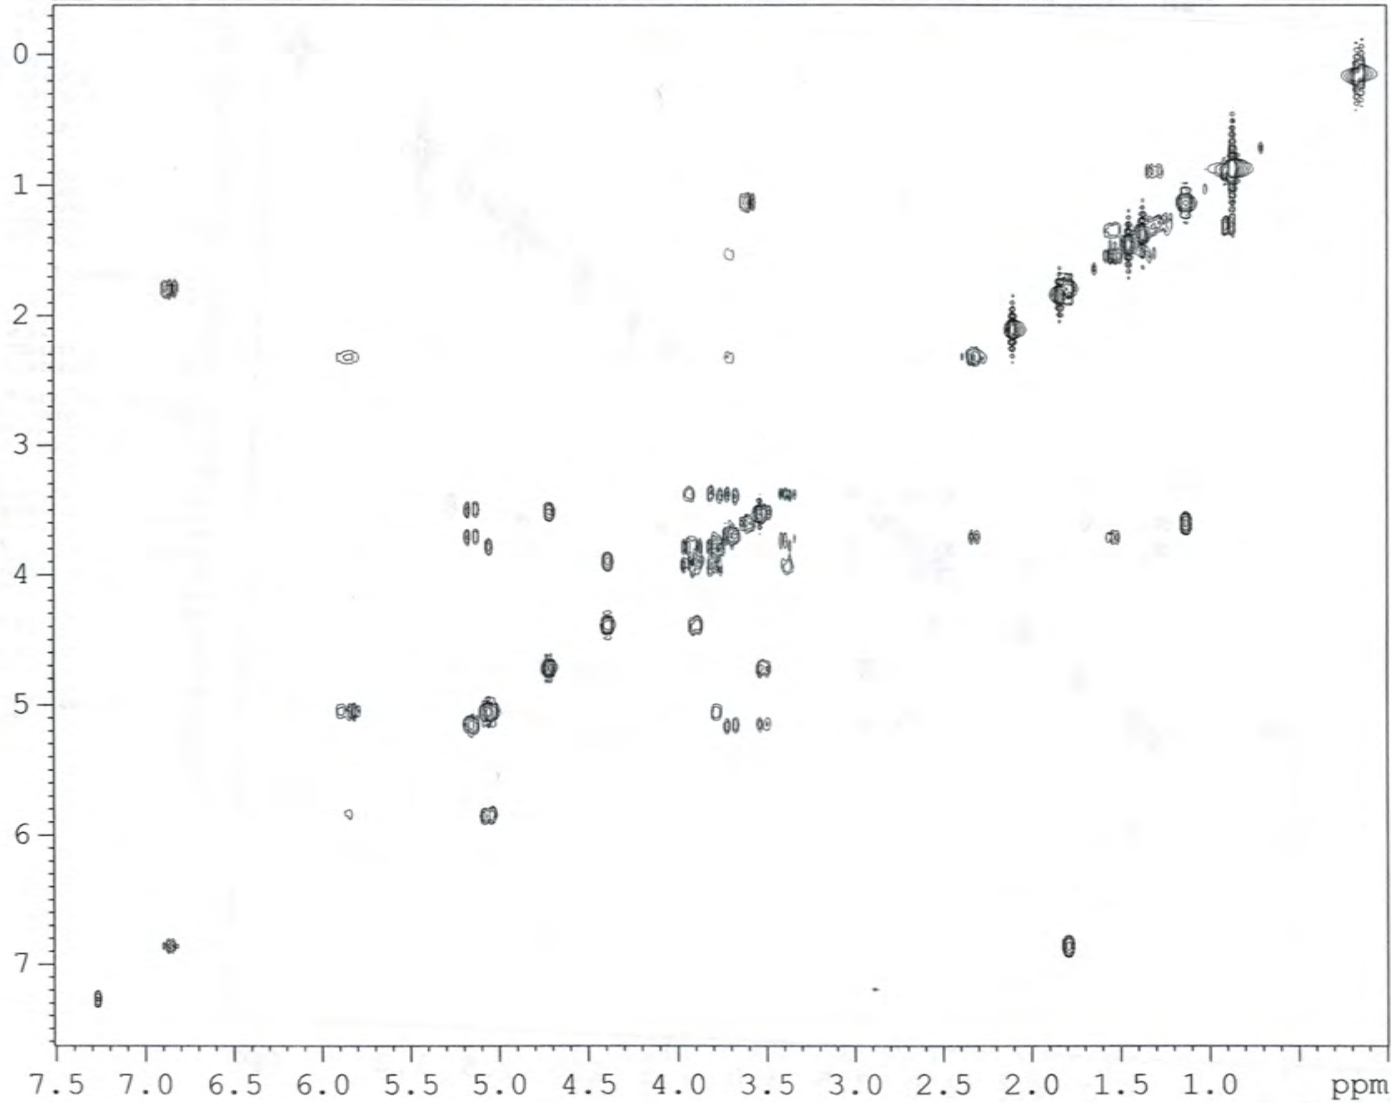

NAME ZGH-Ipom-1-169-A  
 EXPNO 2  
 PROCNO 1  
 Date\_ 20150131  
 Time 11.58  
 INSTRUM spect  
 PROBHD 5 mm PABBO BB-  
 PULPROG cosygpgf  
 TD 2048  
 SOLVENT CDCl3  
 NS 4  
 DS 8  
 SWH 5341.880 Hz  
 FIDRES 2.608340 Hz  
 AQ 0.1917428 sec  
 RG 80.6  
 DW 93.600 usec  
 DE 6.50 usec  
 TE 292.8 K  
 DO 0.00000300 sec  
 D1 1.48689198 sec  
 D13 0.00000400 sec  
 D16 0.00020000 sec  
 INO 0.00018720 sec

===== CHANNEL f1 =====  
 NUC1 1H  
 PO 10.00 usec  
 P1 10.00 usec  
 PL1 -3.50 dB  
 PL1W 31.17620277 W  
 SFO1 400.1324057 MHz

===== GRADIENT CHANNEL =====  
 GPNAM1 SINE.100  
 GPZ1 10.00 %  
 P16 1000.00 usec  
 NDO 1  
 TD 128  
 SFO1 400.1324 MHz  
 FIDRES 41.733440 Hz  
 SW 13.350 ppm  
 FMODE QF  
 SI 1024  
 SF 400.1300040 MHz  
 WDW SINE  
 SSB 0  
 LB 0.00 Hz  
 GB 0  
 PC 1.00  
 SI 1024  
 MC2 QF  
 SF 400.1300033 MHz  
 WDW SINE  
 SSB 0  
 LB 0.00 Hz  
 GB 0

## ZGH-Ipom-1-169-A-150130 HSQC

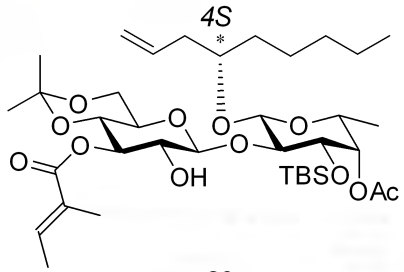

26a

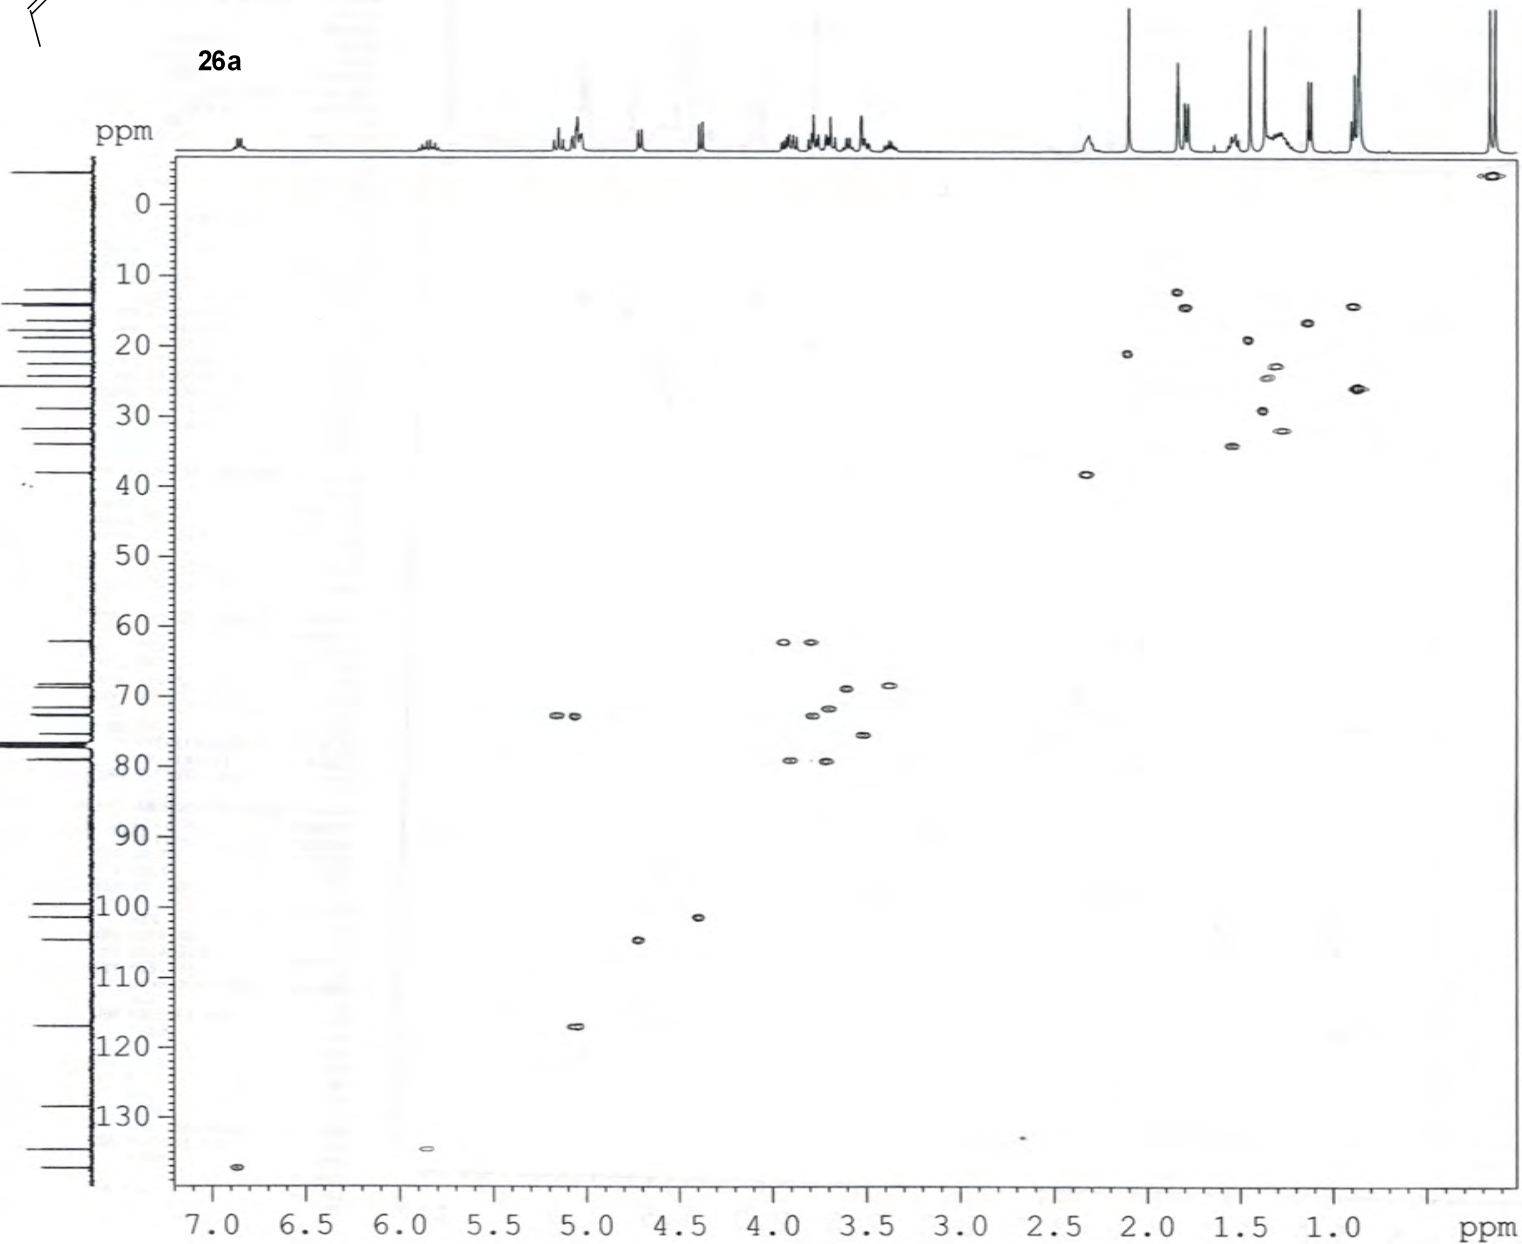

```

NAME      ZGH-Ipom-1-169-A
EXPNO     4
PROCNO    1
Date_     20150131
Time      13.10
INSTRUM   spect
PROBHD    5 mm PABBO BB-
PULPROG   hsqcetgpsi
TD         1024
SOLVENT   CDCl3
NS         4
DS         16
SWH       5341.880 Hz
FIDRES    5.216680 Hz
AQ         0.0958964 sec
RG         2050
DW         93.600 usec
DE         6.50 usec
TE         293.4 K
CNST2     145.0000000
D0         0.00000300 sec
D1         1.50000000 sec
D4         0.00172414 sec
D11        0.03000000 sec
D13        0.00000400 sec
D16        0.00020000 sec
D24        0.00110000 sec
INO        0.00003000 sec
ZGPTNS

```

```

===== CHANNEL f1 =====
NUC1      1H
P1        10.00 usec
P2        20.00 usec
P28       1000.00 usec
PL1       -3.50 dB
PL1W      31.17620277 W
SFO1      400.1324057 MHz

```

```

===== CHANNEL f2 =====
CPDPRG2   garp
NUC2      13C
P3        10.00 usec
P4        20.00 usec
PCPD2     75.00 usec
PL2       -2.10 dB
PL12      15.40 dB
PL2W      58.37759399 W
PL12W     1.03811681 W
SFO2      100.6202727 MHz

```

```

===== GRADIENT CHANNEL =====
GPNAM1    SINE.100
GPNAM2    SINE.100
GPZ1      80.00 %
GPZ2      20.10 %
P16       1000.00 usec
ND0       2
TD         256
SFO1      100.6203 MHz
FIDRES    65.104164 Hz
SW         165.639 ppm
FnMODE    Echo-Antiecho
SI         1024
SF         400.1300000 MHz
WDW        QSINE
SSB        2
LB         0.00 Hz
GB         0
PC         1.00
SI         1024
MC2       echo-antiecho
SF         100.6127690 MHz
WDW        QSINE
SSB        2
LB         0.00 Hz
GB         0

```



EDB-Ipom-1-28-A-recovered in CDCL<sub>3</sub>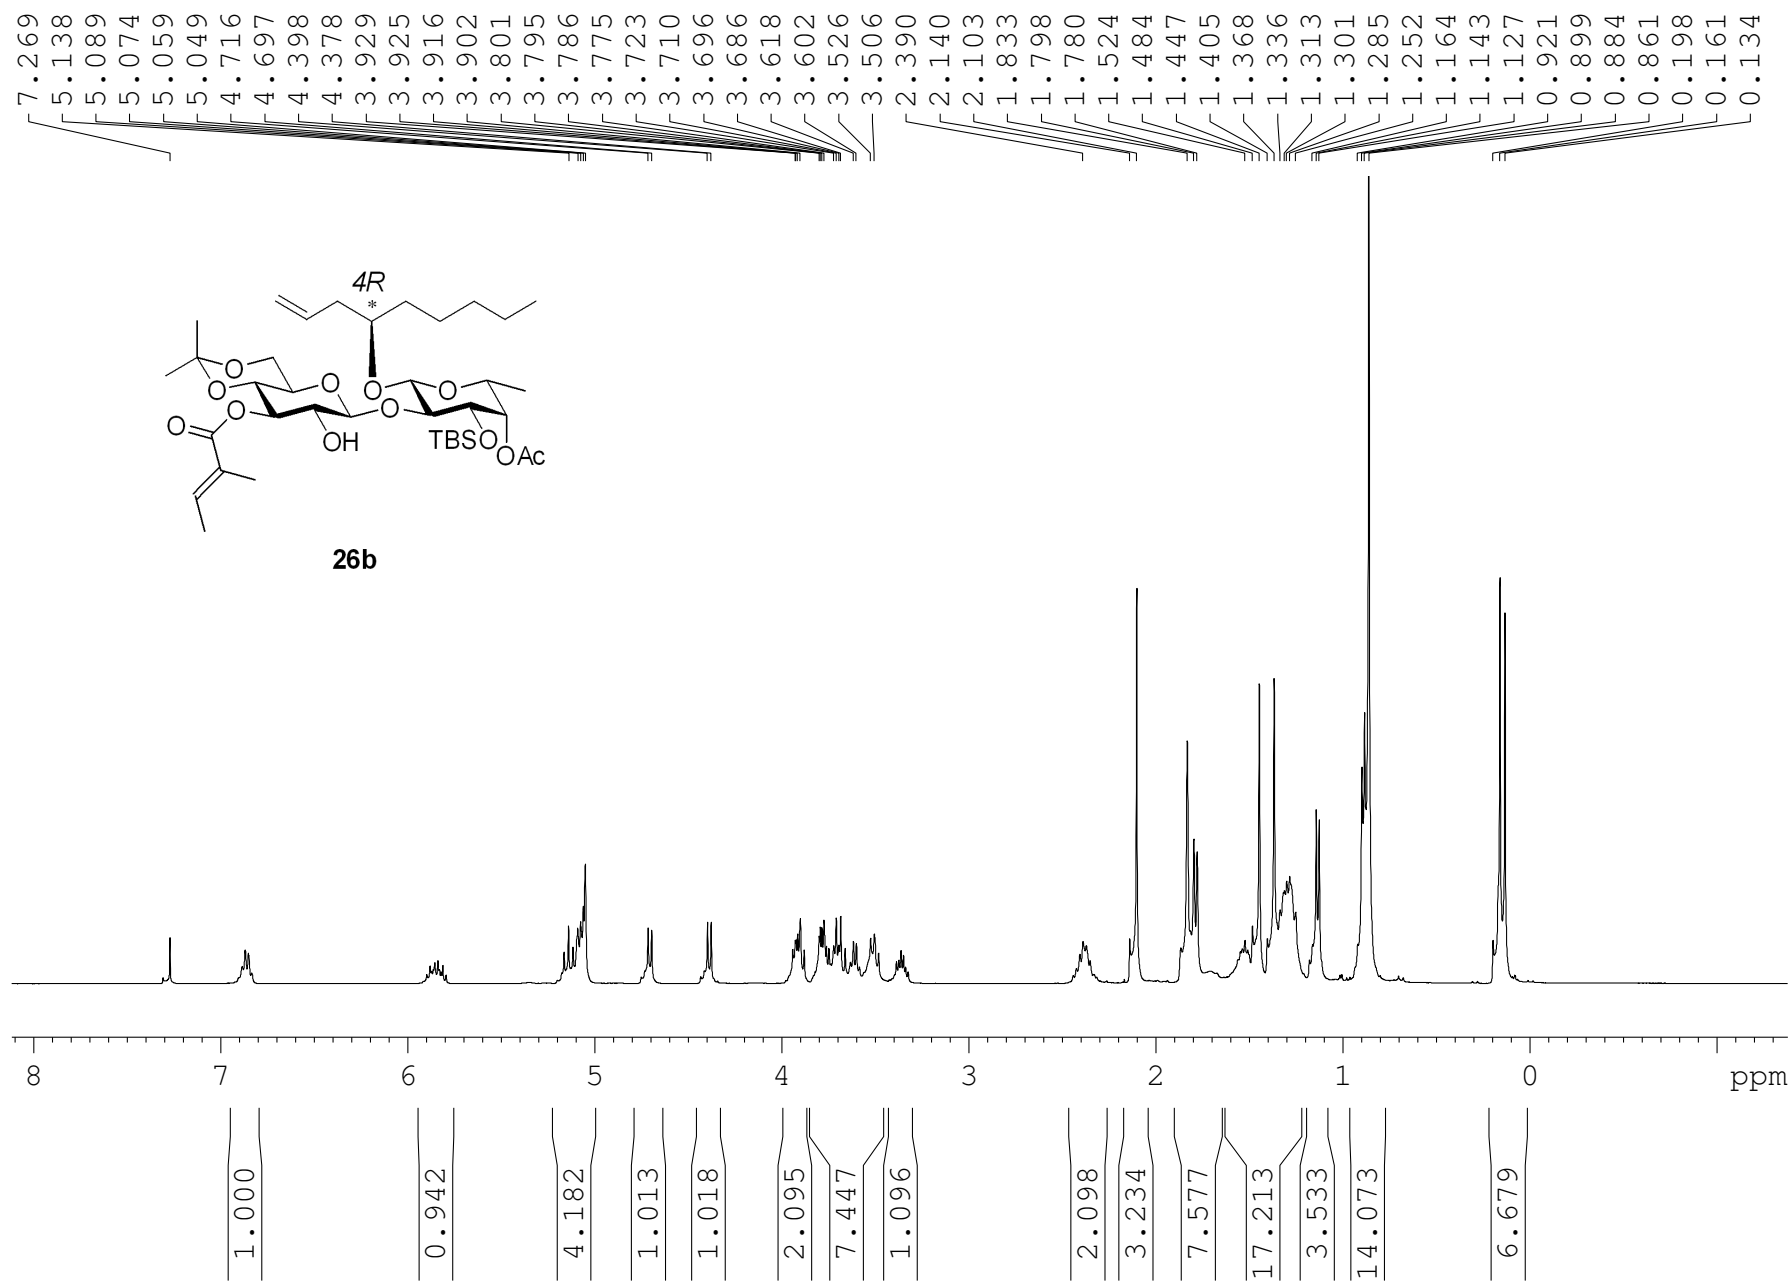

EDB-Ipom-1-28-A-140722 13C in CDCl3 300 MHz

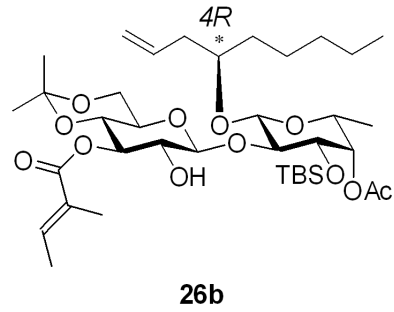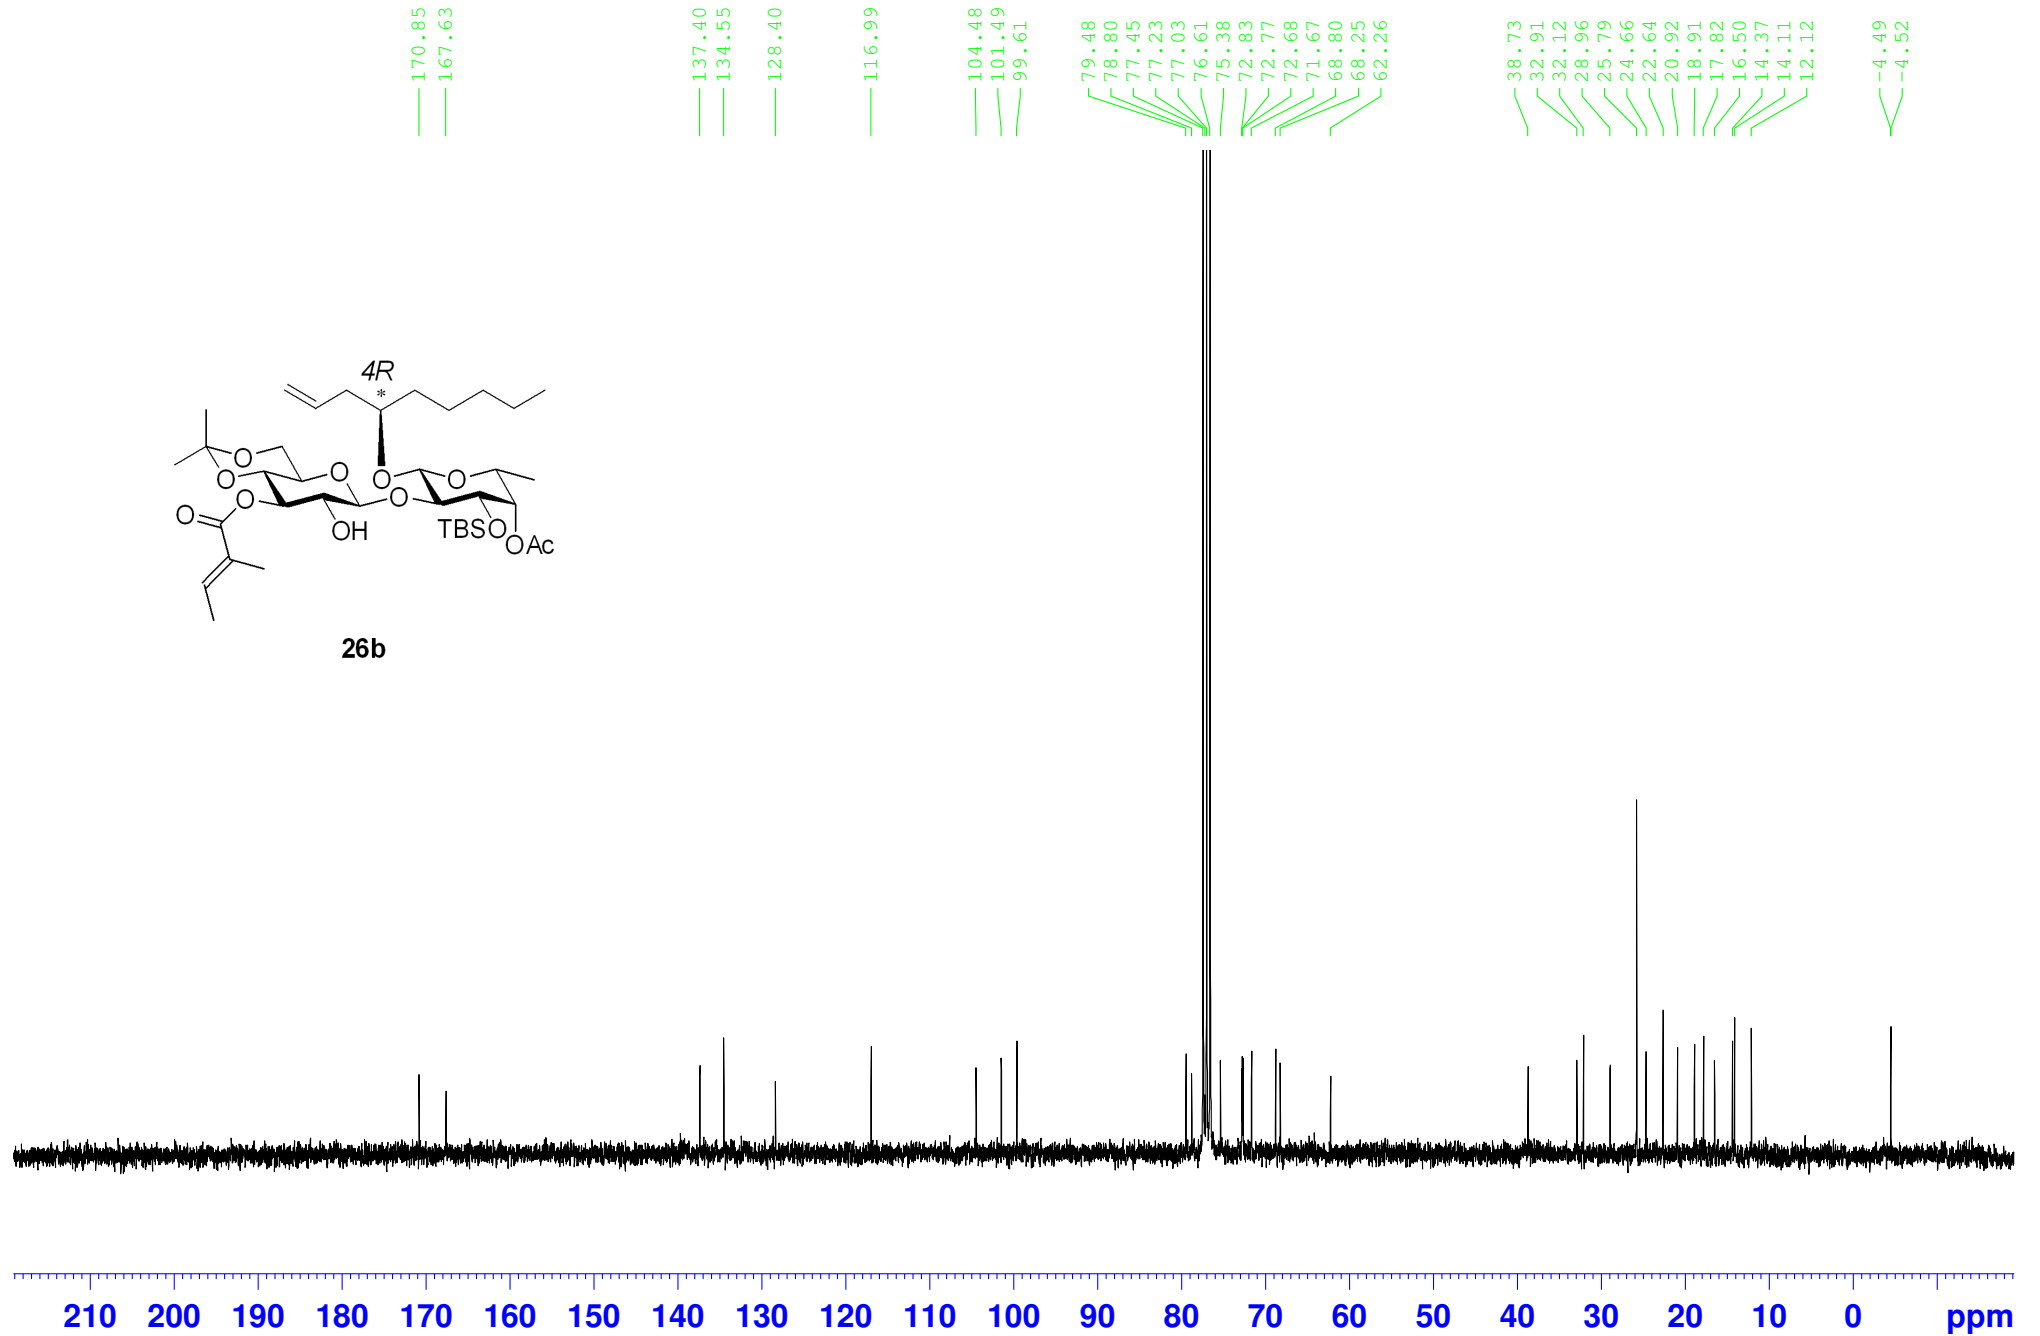

## ZGH-Ipom-1-170-A-140226 1H in CDCl3

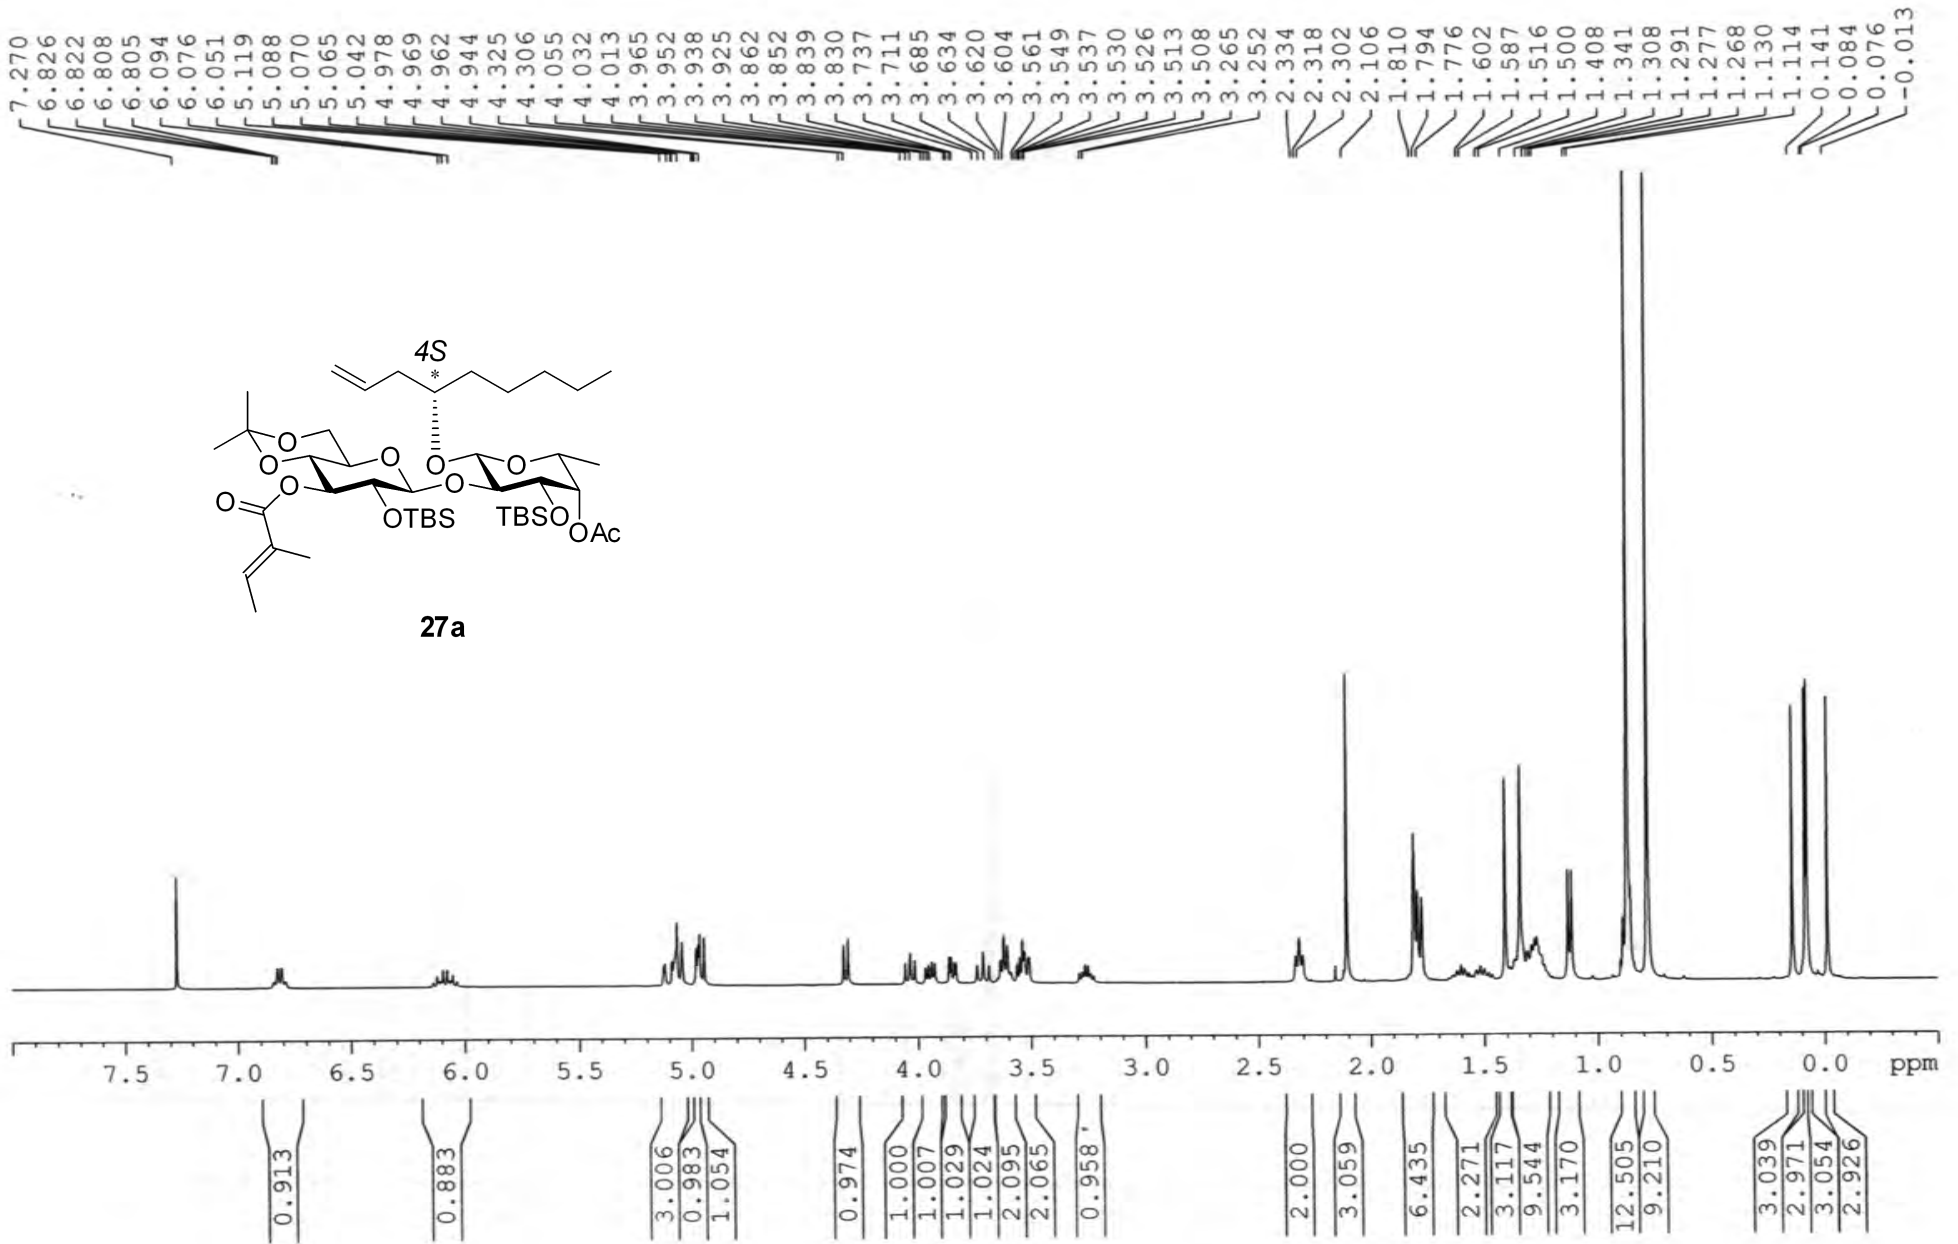

ZGH-*Ipom*-1-170-A-140226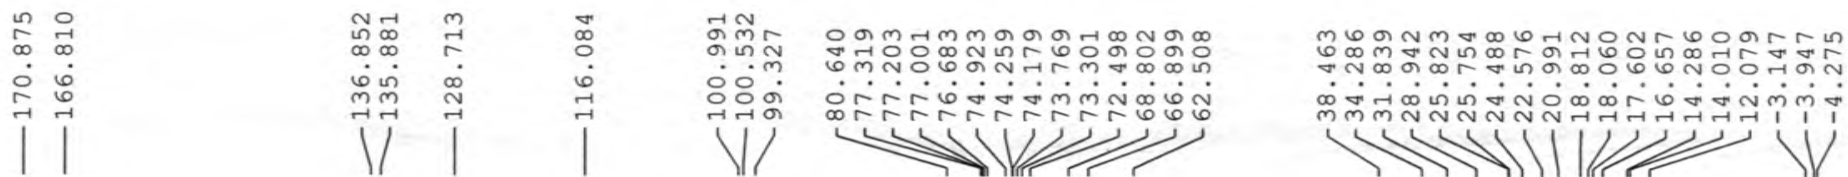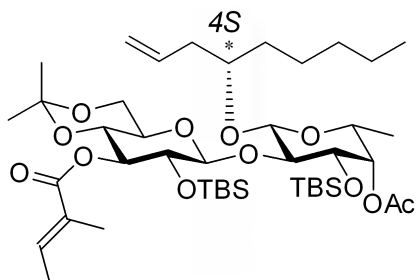

27a

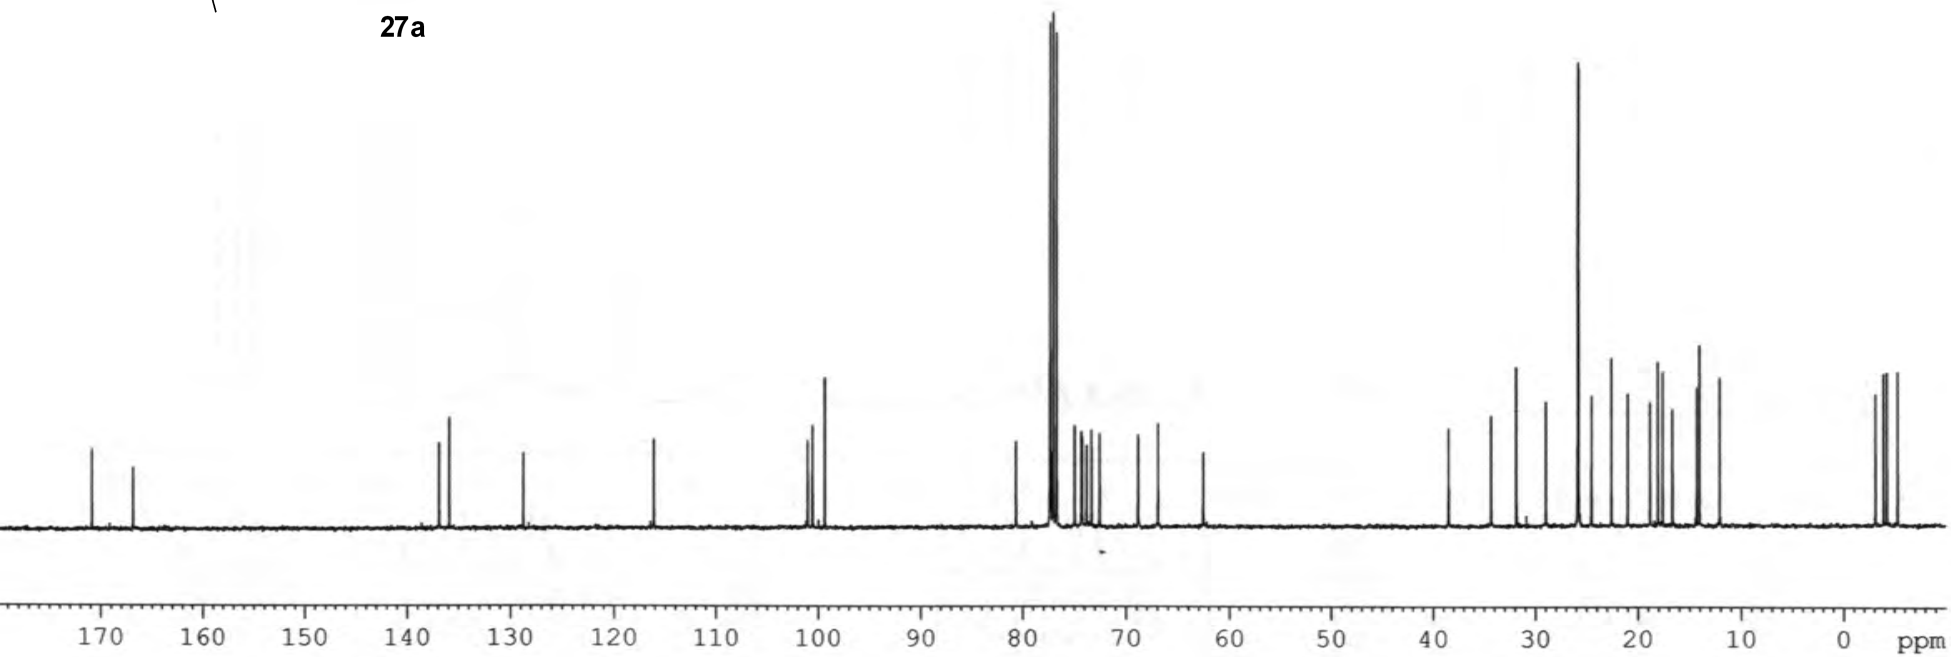

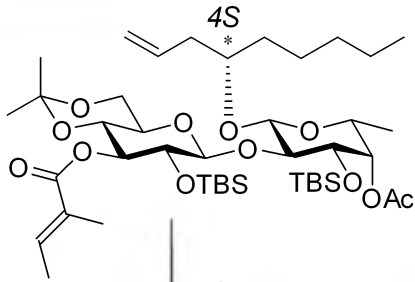ZGH-*Ipom*-1-170-A-140226 COSY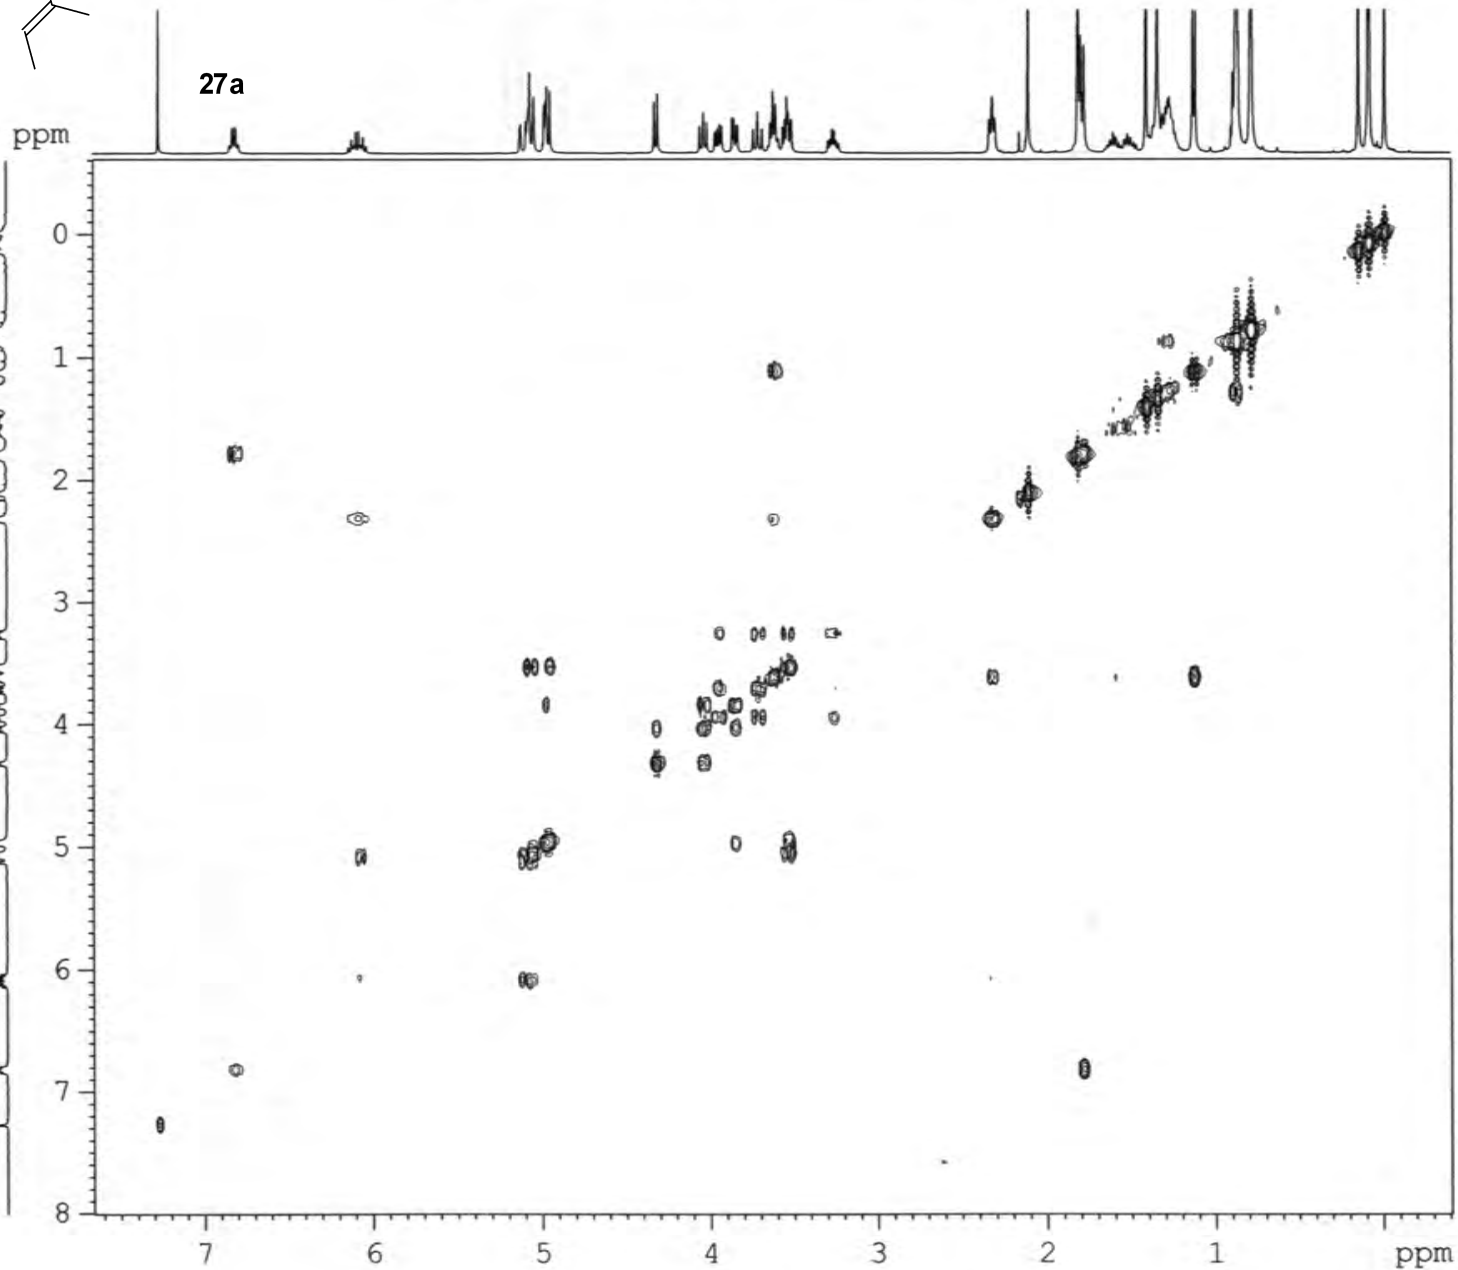

```

NAME      ZGH-Ipom-1-170-A-140226
EXPNO     3
PROCNO    1
Date_     20140302
Time      22.32
INSTRUM   spect
PROBHD    5 mm PABBO BB-
FULPROG   cosygpgf
TD         2048
SOLVENT   CDC13
NS         2
DS         8
SWH        5341.880 Hz
FIDRES     2.608340 Hz
AQ         0.1917428 sec
RG         28.5
DW         93.600 usec
DE         6.50 usec
TE         292.8 K
D0         0.00000300 sec
D1         1.48689198 sec
D13        0.00000400 sec
D16        0.00020000 sec
IN0        0.00018720 sec
  
```

```

===== CHANNEL f1 =====
NUC1      1H
P0        10.00 usec
P1        10.00 usec
PL1       -3.50 dB
PL1W      31.17620277 W
SFO1      400.1324057 MHz
  
```

```

===== GRADIENT CHANNEL =====
GPNAM1    SINE.100
GPZ1      10.00 %
P16       1000.00 usec
ND0        1
TD         128
SFO1      400.1324 MHz
FIDRES     41.733440 Hz
SW         13.350 ppm
FrMODE     QF
SI         1024
SF         400.1300040 MHz
WDW        SINE
SSB        0
LB         0.00 Hz
GB         0
PC         1.00
SI         1024
MC2        QF
SF         400.1300033 MHz
WDW        SINE
SSB        0
LB         0.00 Hz
GB         0
  
```

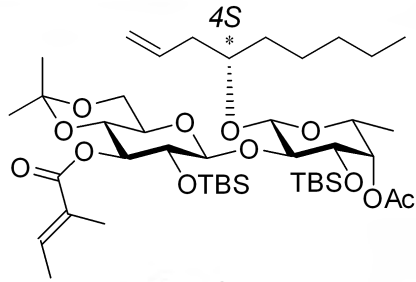ZGH-*Ipom*-1-170-A-140226 HSQC

27a

ppm

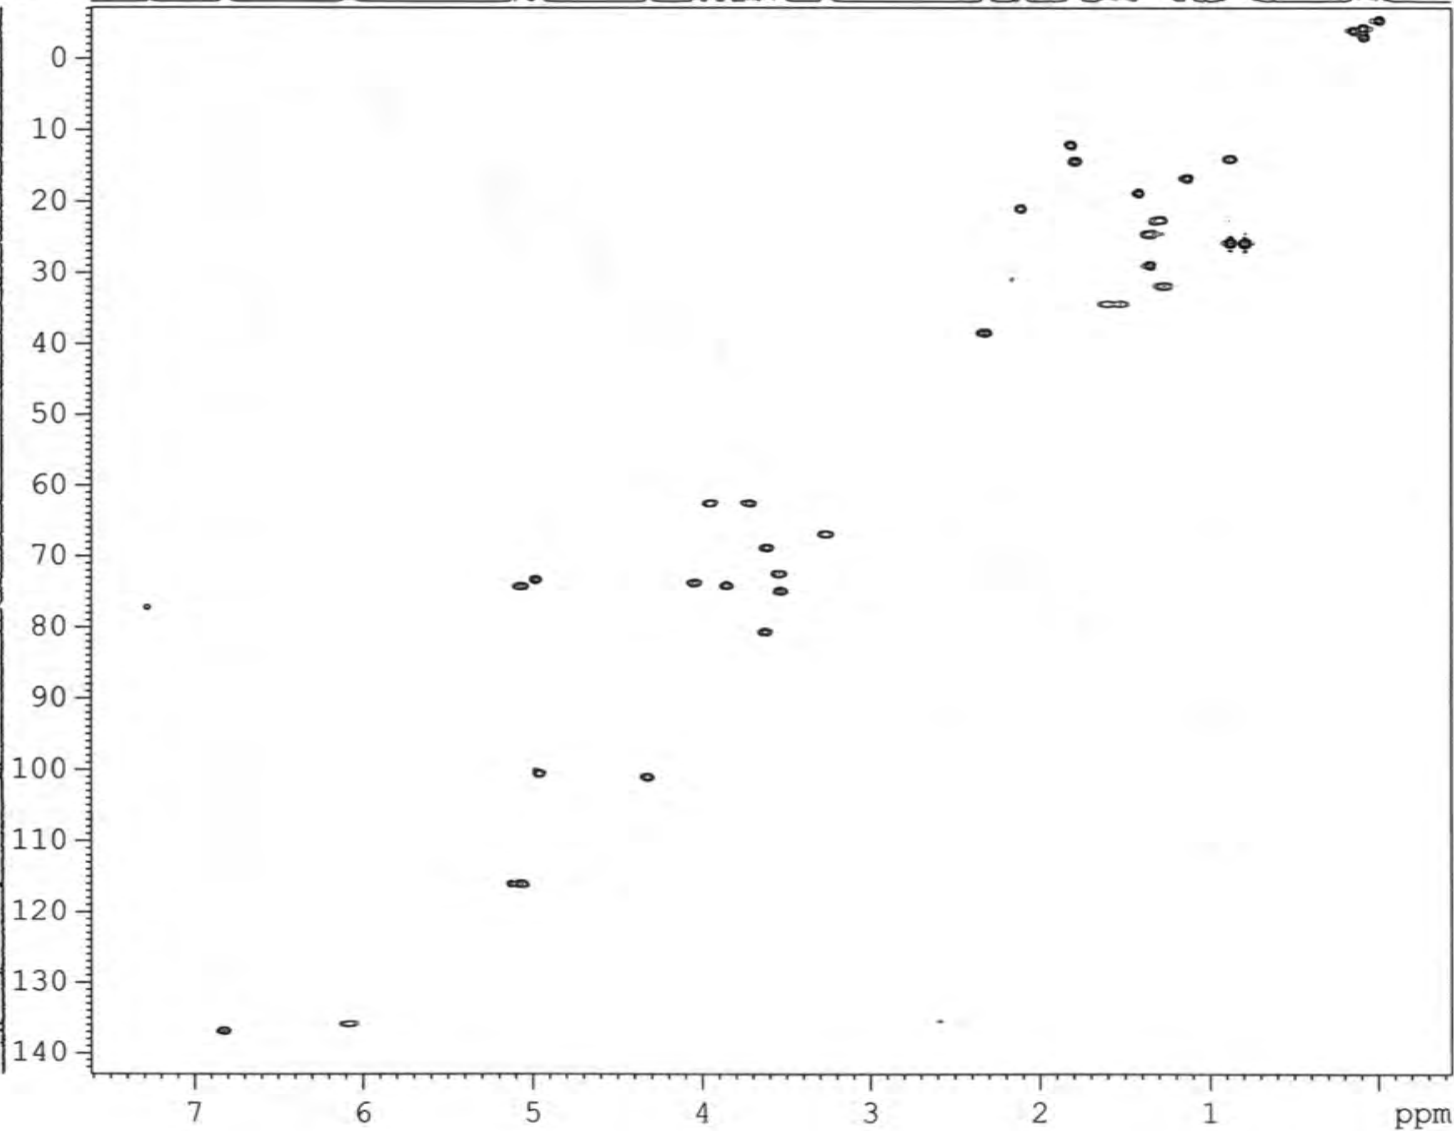

NAME ZGH-*Ipom*-1-170-A-140226  
 EXPNO 4  
 PROCNO 1  
 Date\_ 20140302  
 Time 22.40  
 INSTRUM spect  
 PROBHD 5 mm PABBO BB-  
 FULPROG hsqcetgps1  
 TD 1024  
 SOLVENT CDCl3  
 NS 6  
 DS 16  
 SWH 5341.880 Hz  
 FIDRES 5.216680 Hz  
 AQ 0.0958964 sec  
 RG 2050  
 DW 93.600 usec  
 DE 6.50 usec  
 TE 292.3 K  
 CNST2 145.0000000  
 D0 0.00000300 sec  
 D1 1.50000000 sec  
 D4 0.00172414 sec  
 D11 0.03000000 sec  
 D13 0.00000400 sec  
 D16 0.00020000 sec  
 D24 0.00110000 sec  
 INO 0.00003000 sec  
 ZGPTNS

===== CHANNEL f1 =====  
 NUC1  $^1\text{H}$   
 P1 10.00 usec  
 P2 20.00 usec  
 P28 1000.00 usec  
 PL1 -3.50 dB  
 PL1W 31.17620277 W  
 SFO1 400.1324057 MHz

===== CHANNEL f2 =====  
 CPDPRG2 garp  
 NUC2  $^{13}\text{C}$   
 P3 10.00 usec  
 P4 20.00 usec  
 PCPD2 75.00 usec  
 PL2 -2.10 dB  
 PL12 15.40 dB  
 PL2W 58.37759399 W  
 PL12W 1.03811681 W  
 SFO2 100.6202727 MHz

===== GRADIENT CHANNEL =====  
 GPNAM1 SINE.100  
 GPNAM2 SINE.100  
 GPZ1 80.00 %  
 GPZ2 20.10 %  
 P16 1000.00 usec  
 ND0 2  
 TD 256  
 SFO1 100.6203 MHz  
 FIDRES 65.104164 Hz  
 SW 165.639 ppm  
 FMODE Echo-Antiecho  
 SI 1024  
 SF 400.1300000 MHz  
 WDW QSINE  
 SSB 2  
 LB 0.00 Hz  
 GB 0  
 PC 1.00  
 SI 1024  
 MC2 echo-antiecho  
 SF 100.6127690 MHz  
 WDW QSINE  
 SSB 2  
 LB 0.00 Hz  
 GB 0

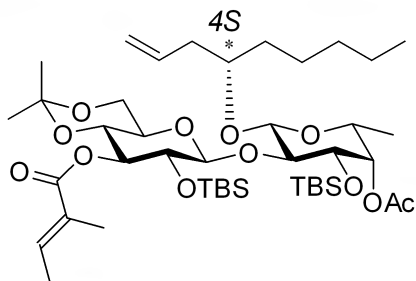

ZGH-Ipom-1-170-A-140226 HMBC in CDCL<sub>3</sub>

27a

ppm

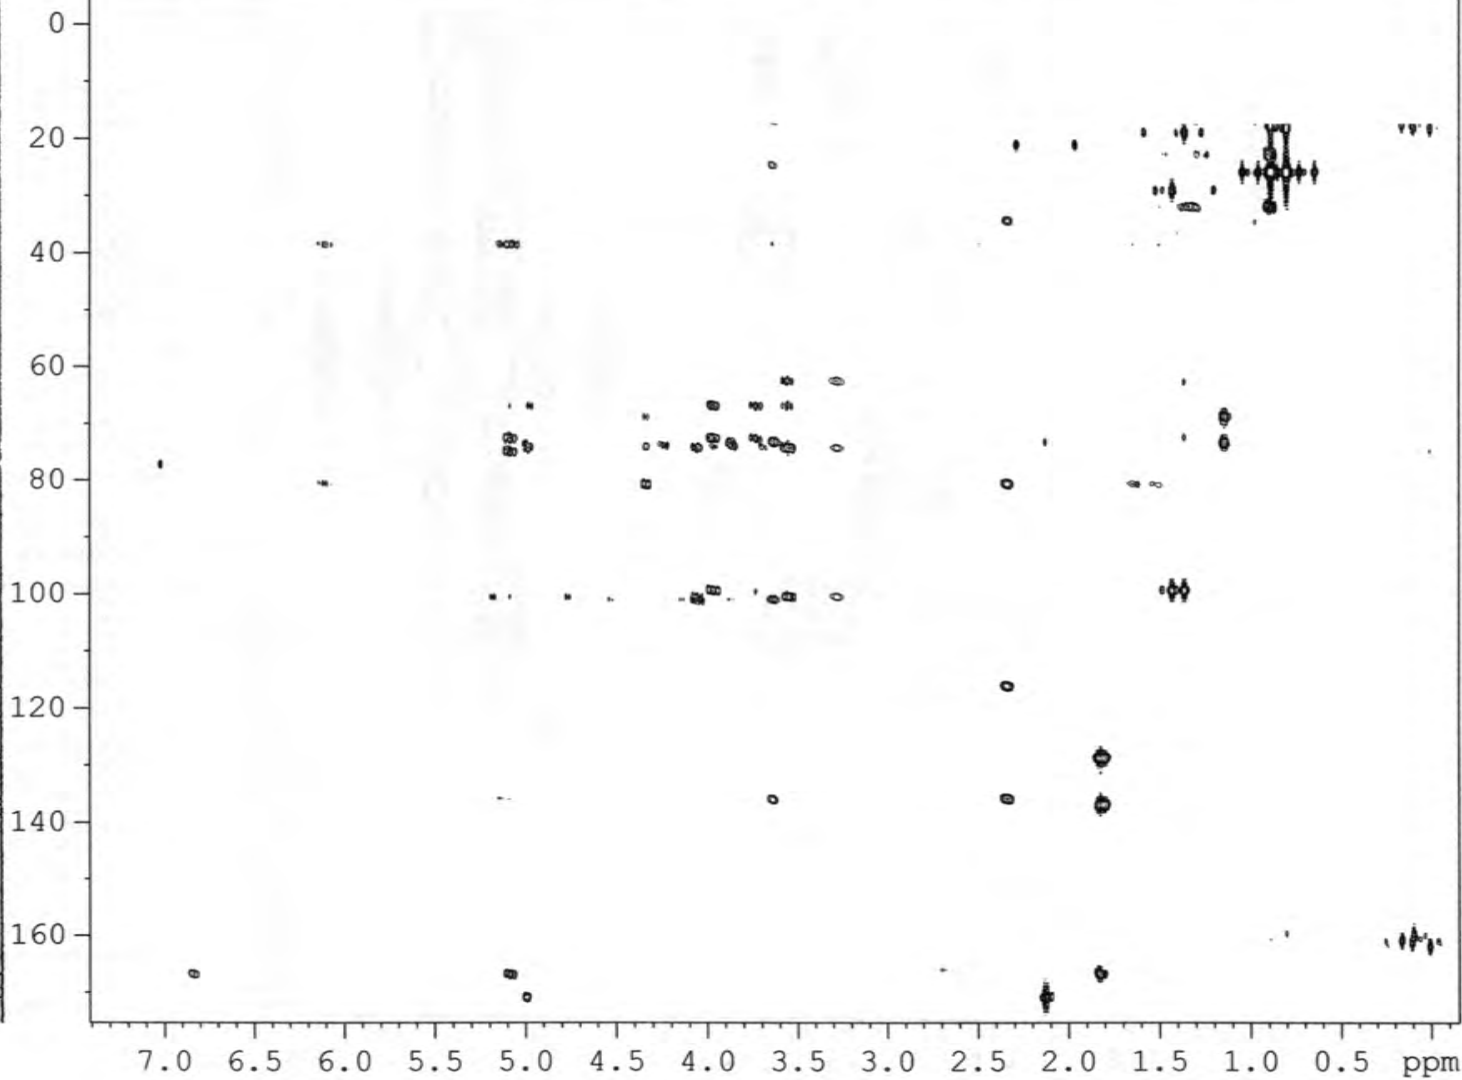

NAME ZGH-Ipom-1-170-A-140226  
 EXPNO 5  
 PROCNO 1  
 Date\_ 20150314  
 Time\_ 0.23  
 INSTRUM spect  
 PROBHD 5 mm PABBO BB-  
 PULPROG hmbcgp1pndgf  
 TD 4096  
 SOLVENT CDCl<sub>3</sub>  
 NS 90  
 DS 16  
 SWH 5208.333 Hz  
 FIDRES 1.271566 Hz  
 AQ 0.3932660 sec  
 RG 2050  
 DW 96.000 usec  
 DE 6.50 usec  
 TE 292.3 K  
 CNST2 145.0000000  
 CNST13 10.0000000  
 D0 0.00000300 sec  
 D1 1.50000000 sec  
 D2 0.00344828 sec  
 D6 0.05000000 sec  
 D16 0.00020000 sec  
 IN0 0.00003010 sec

----- CHANNEL f1 -----  
 NUC1 1H  
 P1 10.00 usec  
 P2 20.00 usec  
 PL1 -3.50 dB  
 PL1W 31.17620277 W  
 SFO1 400.1325208 MHz

----- CHANNEL f2 -----  
 NUC2 13C  
 P3 10.00 usec  
 PL2 -2.10 dB  
 PL2W 58.37759399 W  
 SFO2 100.6228138 MHz

----- GRADIENT CHANNEL -----  
 GPNAM1 SINE.100  
 GPNAM2 SINE.100  
 GPNAM3 SINE.100  
 GPZ1 50.00 %  
 GPZ2 30.00 %  
 GPZ3 40.10 %  
 P16 1000.00 usec  
 ND0 2  
 TD 128  
 SFO1 100.6228 MHz  
 FIDRES 129.709091 Hz  
 SW 165.000 ppm  
 FmMODE QF  
 SI 2048  
 SF 400.1300000 MHz  
 WDW SINE  
 SSB 0  
 LB 0.00 Hz  
 GB 0  
 PC 4.00  
 SI 1024  
 MC2 QF  
 SF 100.6127690 MHz  
 WDW SINE  
 SSB 0  
 LB 0.00 Hz  
 GB 0

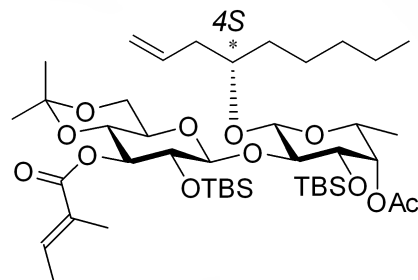

27a

ZGH-*Ipom*-1-170-A-140226 HMBC in CDCl<sub>3</sub>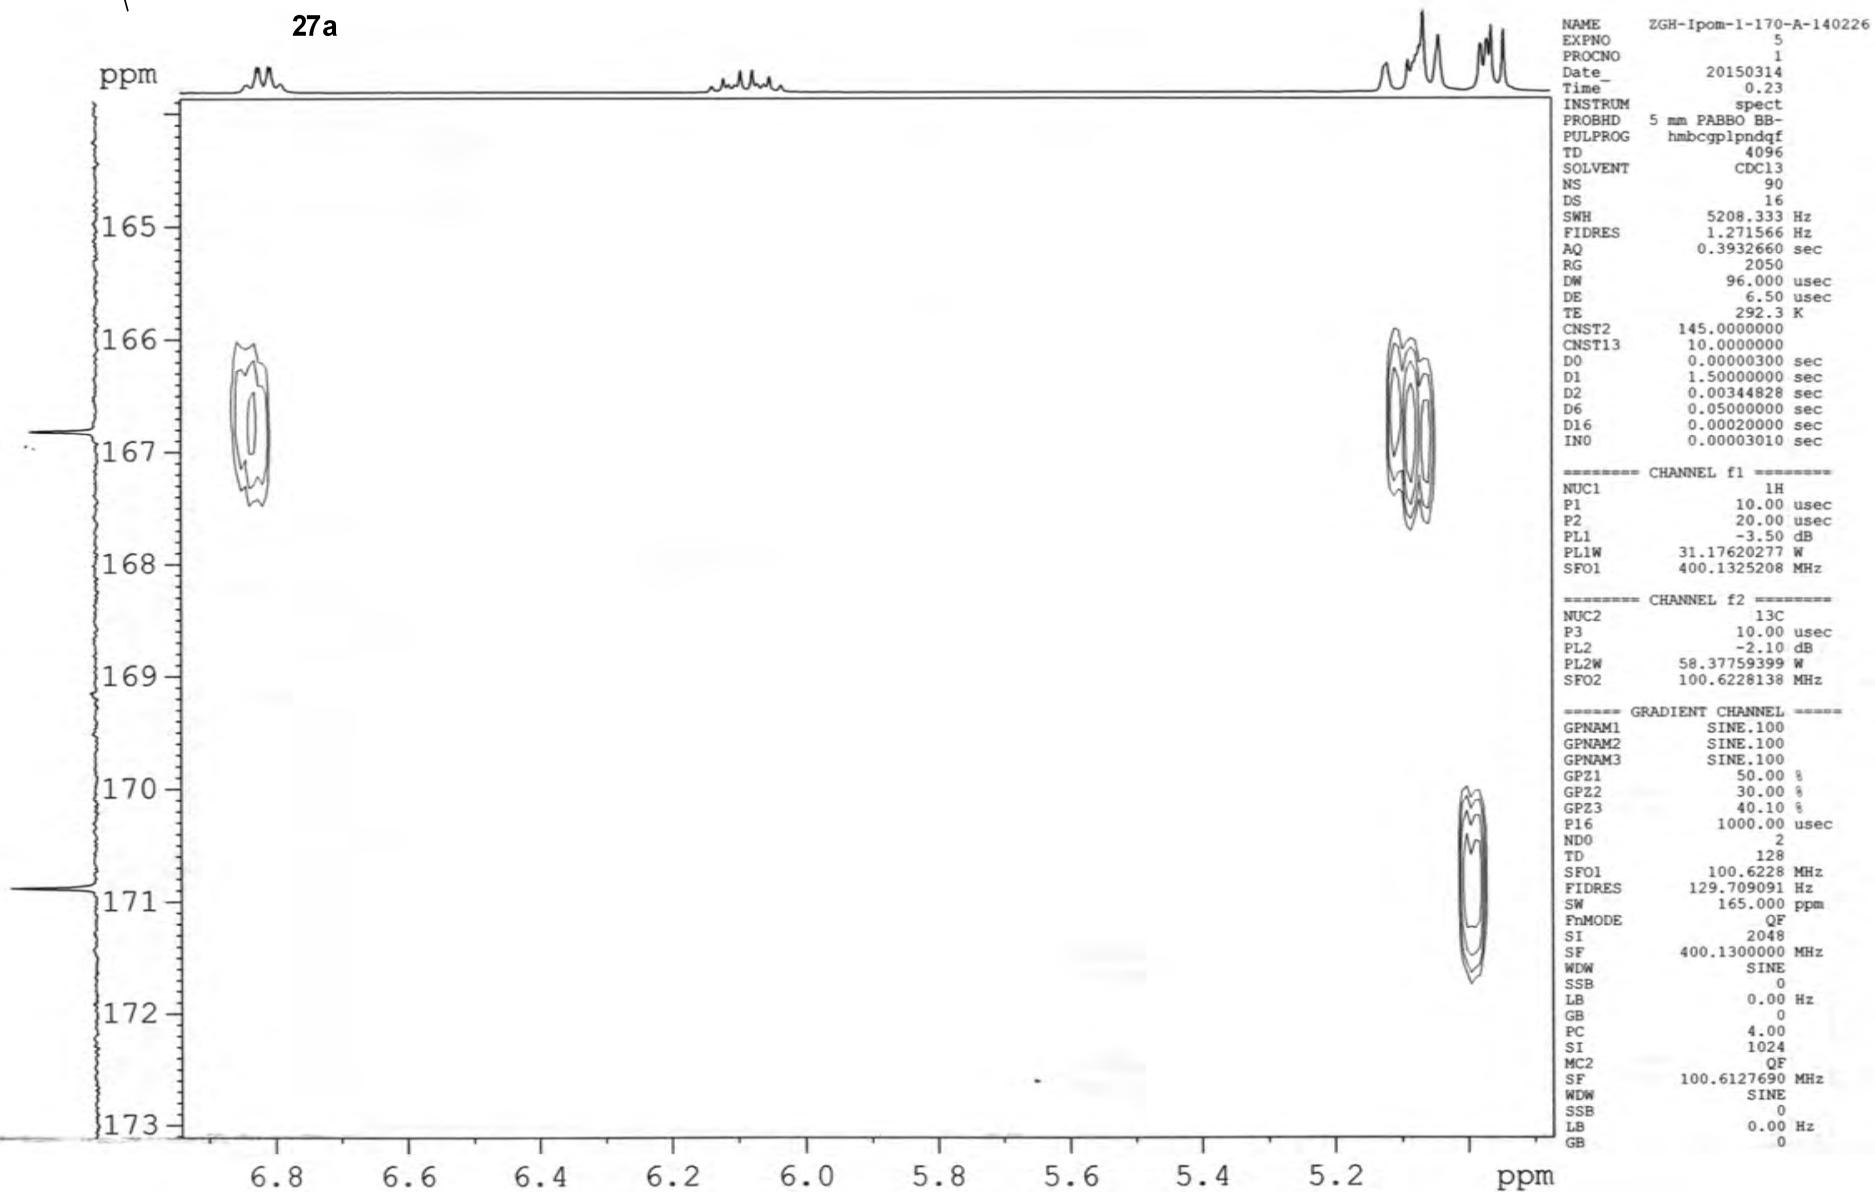



## ZGH-Ipom-1-170-B-140119 1H in CDCl3

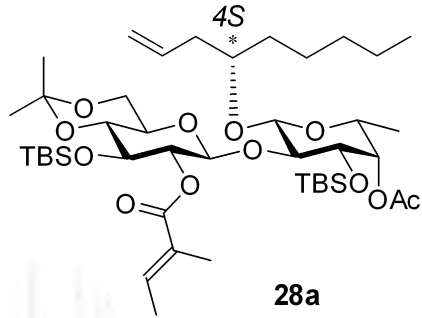

28a

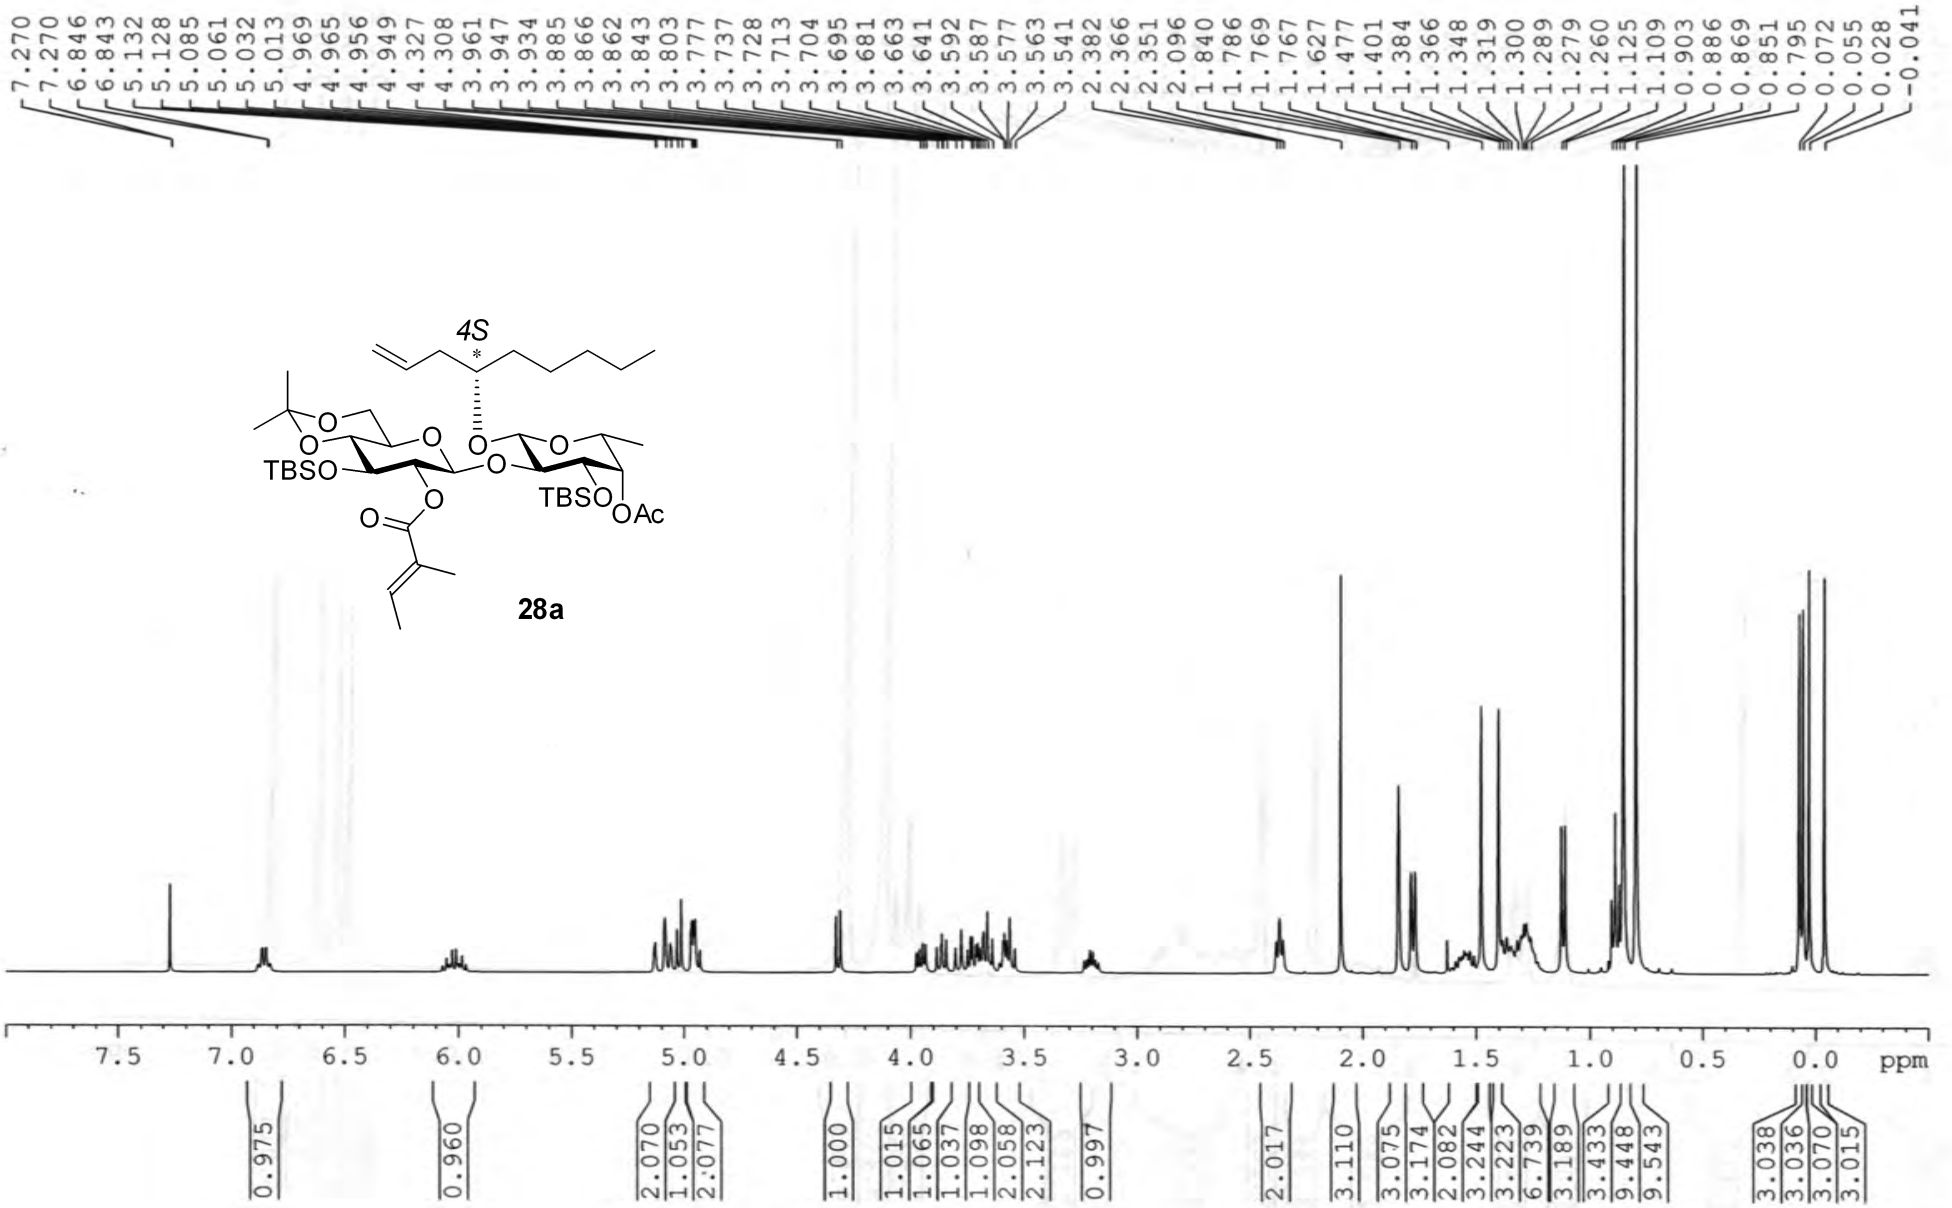

ZGH-*Ipom*-1-170-B-140117 <sup>13</sup>C in CDCl<sub>3</sub>

— 170.777  
— 165.985

— 137.514  
— 135.486  
— 128.567

— 116.387

— 101.339  
— 99.683  
— 99.326  
— 79.965  
— 77.317  
— 77.203  
— 76.999  
— 76.681  
— 75.704  
— 75.275  
— 73.924  
— 73.826  
— 73.618  
— 73.433  
— 68.797  
— 67.191  
— 62.386

— 38.277  
— 34.181  
— 31.870  
— 28.961  
— 25.833  
— 25.633  
— 24.547  
— 22.627  
— 20.905  
— 18.905  
— 18.042  
— 17.754  
— 16.532  
— 14.224  
— 14.046  
— 12.249  
— 4.176  
— 4.464  
— 4.568  
— 5.111

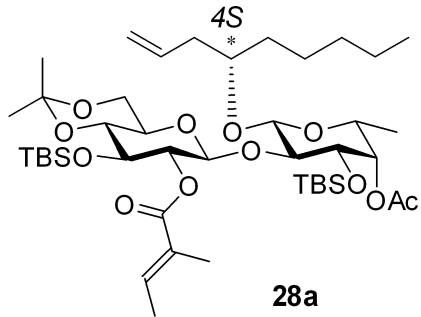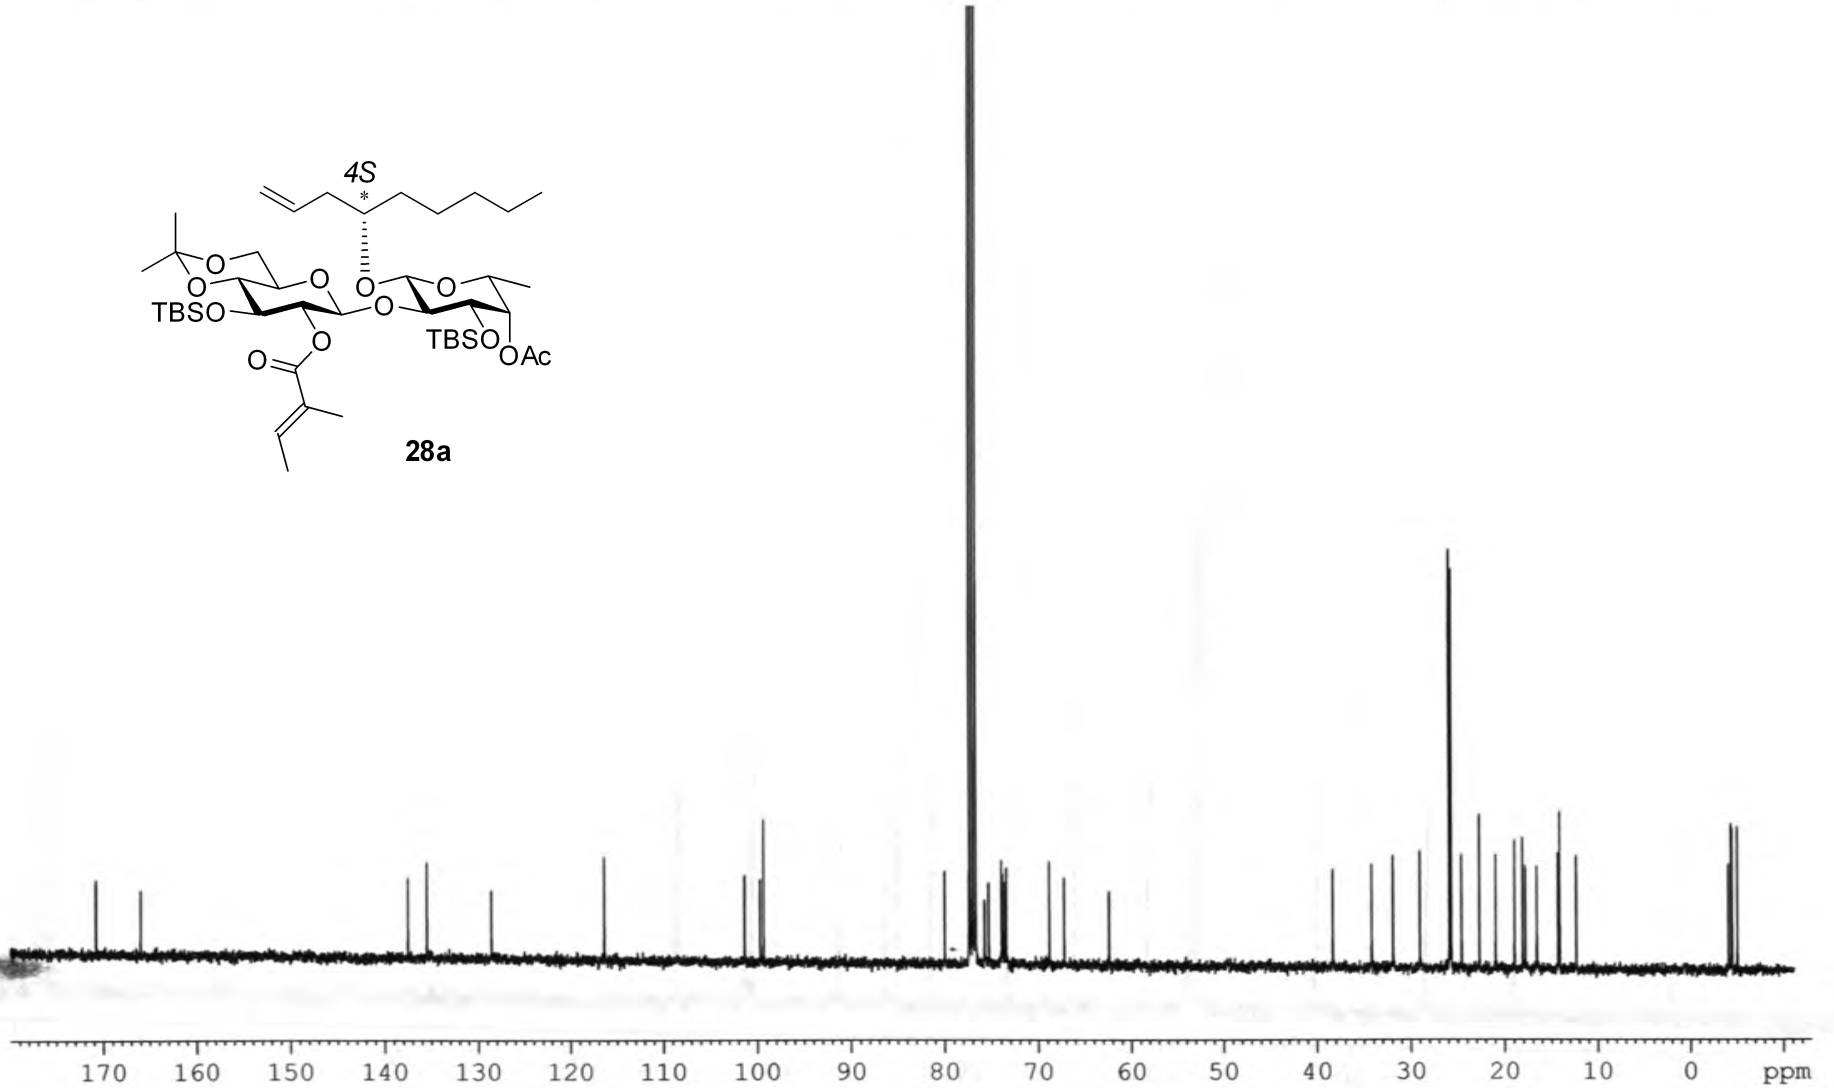

## ZGH-Ipom-1-170-B-140119 COSY

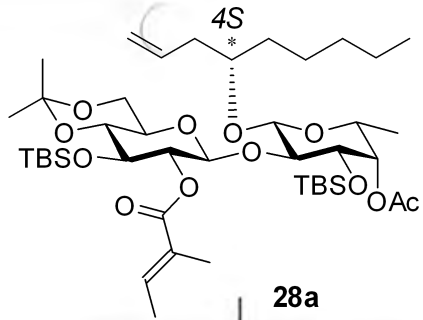

NAME ZGH-Ipom-1-170-B-140119  
 EXPNO 2  
 PROCNO 1  
 Date 20141204  
 Time 22.38  
 INSTRUM spect  
 PROBHD 5 mm PABBO BB-  
 PULPROG cosygppqf  
 TD 2048  
 SOLVENT CDCl3  
 NS 8  
 DS 8  
 SWH 5341.880 Hz  
 FIDRES 2.608340 Hz  
 AQ 0.1917428 sec  
 RG 101  
 DW 93.600 usec  
 DE 6.50 usec  
 TE 292.6 K  
 D0 0.00000300 sec  
 D1 1.48689198 sec  
 D13 0.00000400 sec  
 D16 0.00020000 sec  
 INO 0.00018720 sec

----- CHANNEL f1 -----  
 NUC1 1H  
 P0 10.00 usec  
 P1 10.00 usec  
 PL1 -3.50 dB  
 PL1W 31.17620277 W  
 SFO1 400.1324057 MHz

----- GRADIENT CHANNEL -----  
 GPNAM1 SINE.100  
 GPZ1 10.00 usec  
 P16 1000.00 usec  
 NDO 1  
 TD 128  
 SFO1 400.1324 MHz  
 FIDRES 41.733440 Hz  
 SW 13.350 ppm  
 FMODE QF  
 SI 1024  
 SF 400.1300040 MHz  
 WDW SINE  
 SSB 0  
 LB 0.00 Hz  
 GB 0  
 PC 1.00  
 SI 1024  
 MC2 QF  
 SF 400.1300033 MHz  
 WDW SINE  
 SSB 0  
 LB 0.00 Hz  
 GB 0

ppm

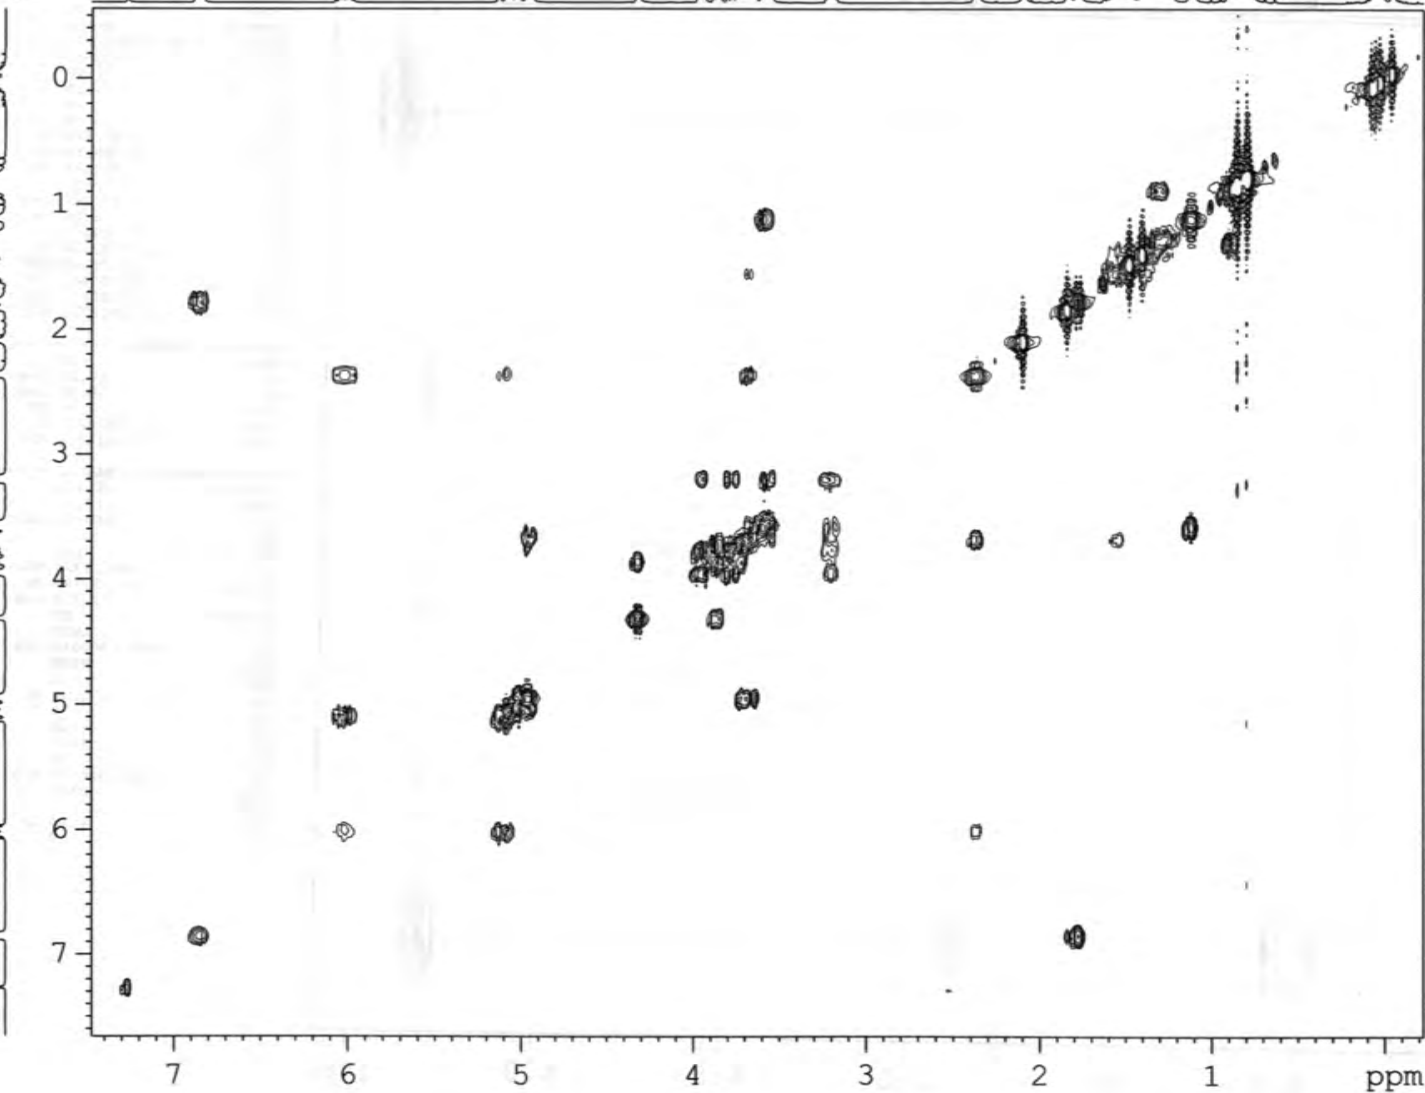

ppm

ZGH-*Ipom*-1-170-B-140117 HSQC

```

NAME      ZGH-Ipom-1-170-B-140117
EXPNO     4
PROCNO    1
Date_     20140120
Time      23.18
INSTRUM   spect
PROBHD    5 mm PABBO BB-
PULPROG   hsqcetgps1
TD         1024
SOLVENT   CDC13
NS         4
DS         16
SWH        5341.880 Hz
FIDRES     5.216680 Hz
AQ         0.0958964 sec
RG         2050
DW         93.600 usec
DE         6.50
TE         292.5 K
CNST2     145.0000000
D0         0.00000300 sec
D1         1.50000000 sec
D4         0.00172414 sec
D11        0.030000000 sec
D13        0.00000400 sec
D16        0.00020000 sec
D24        0.00110000 sec
INO        0.00003000 sec
ZGPTNS

```

```

===== CHANNEL f1 =====
NUC1      1H
P1        10.00 usec
P2        20.00 usec
P28       1000.00 usec
PL1       -3.50 dB
PL1W      31.17620277 W
SFO1      400.1324057 MHz

```

```

===== CHANNEL f2 =====
CPDPRG2   garp
NUC2      13C
P3        10.00 usec
P4        20.00 usec
PCPD2     75.00 usec
PL2       -2.10 dB
PL12      15.40 dB
PL2W      58.37759399 W
PL12W     1.03811681 W
SFO2      100.6202727 MHz

```

```

===== GRADIENT CHANNEL =====
GPNAM1    SINE.100
GPNAM2    SINE.100
GPZ1      80.00 %
GPZ2      20.10 %
P16       1000.00 usec
ND0       2
TD         256
SFO1      100.6203 MHz
FIDRES     65.104164 Hz
SW         165.639 ppm
FnMODE    Echo-Antiecho
SI         1024
SF         400.1300000 MHz
WDW        QSINE
SSB        2
LB         0.00 Hz
GB         0
PC         1.00
SI         1024
MC2       echo-antiecho
SF         100.6127690 MHz
WDW        QSINE
SSB        2
LB         0.00 Hz
GB         0

```

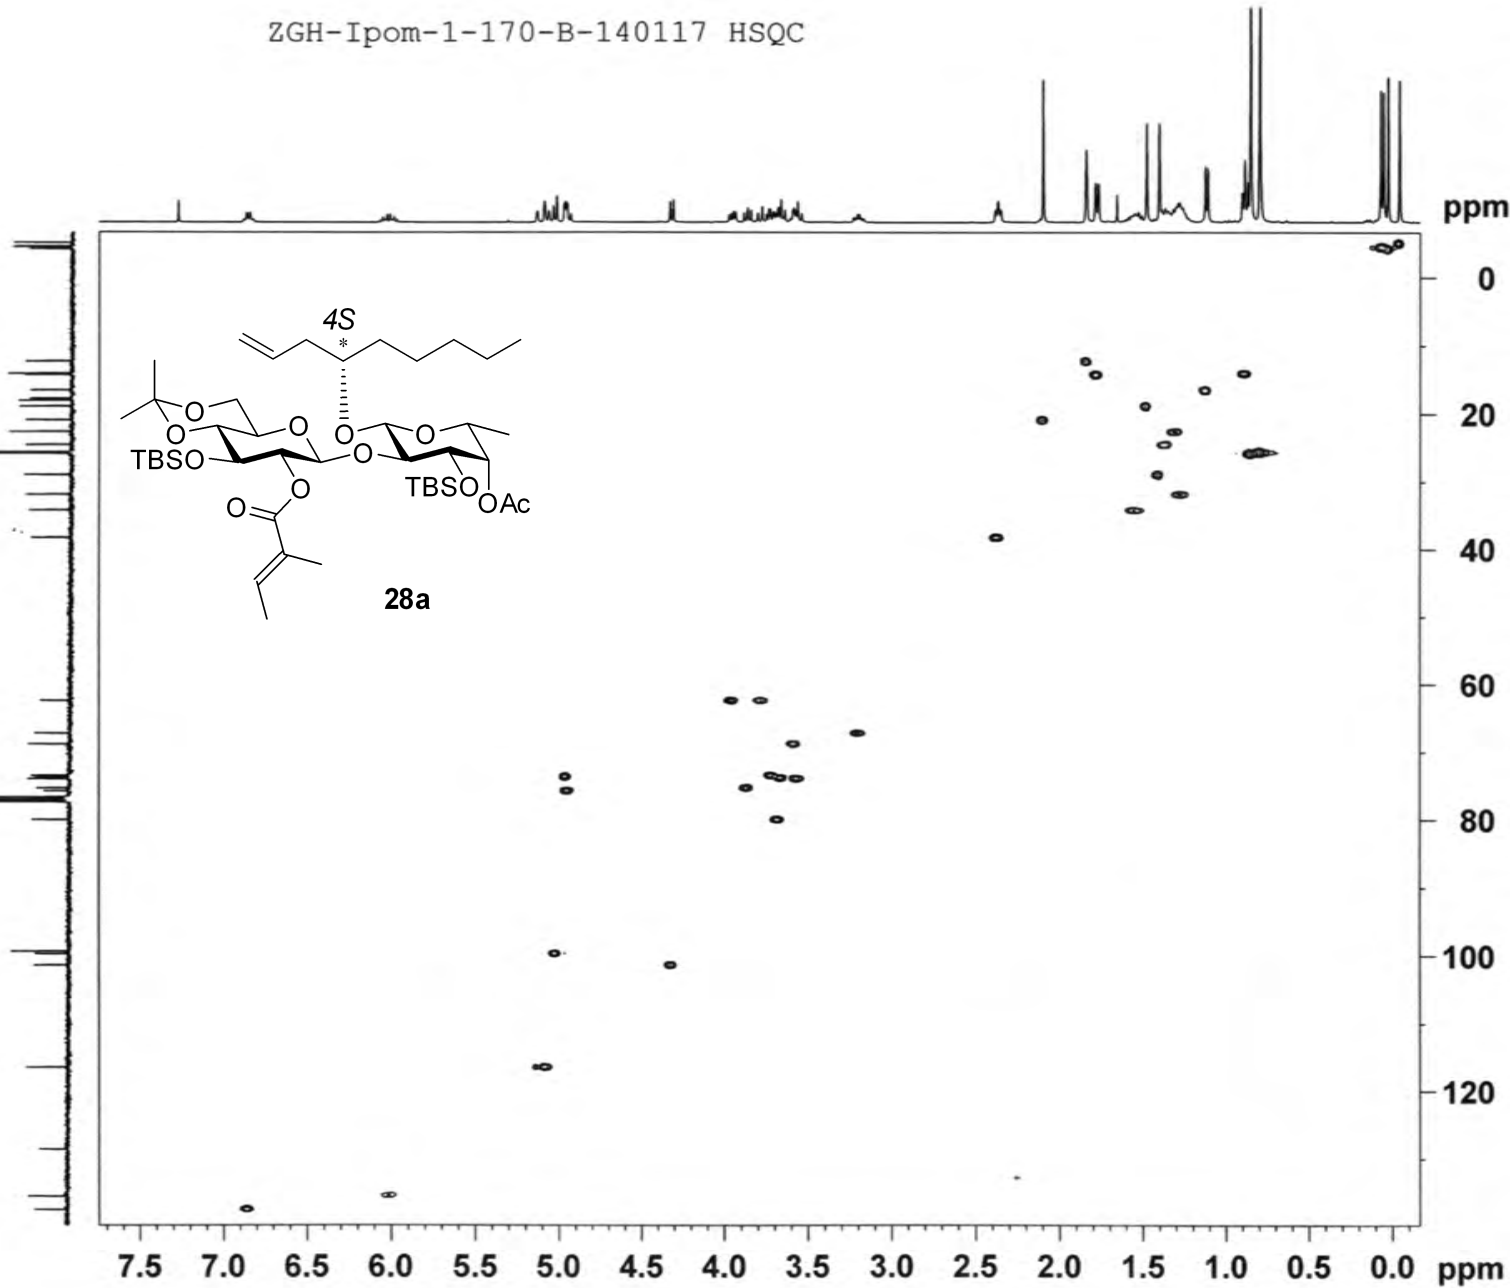

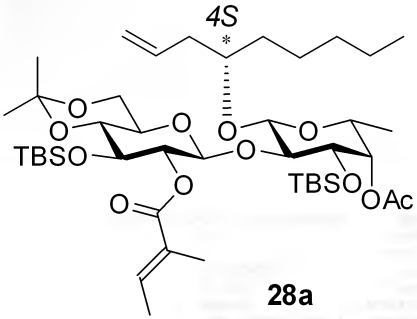

ZGH-*Ipom*-1-170-B-140119 HMBC in CDCl<sub>3</sub>

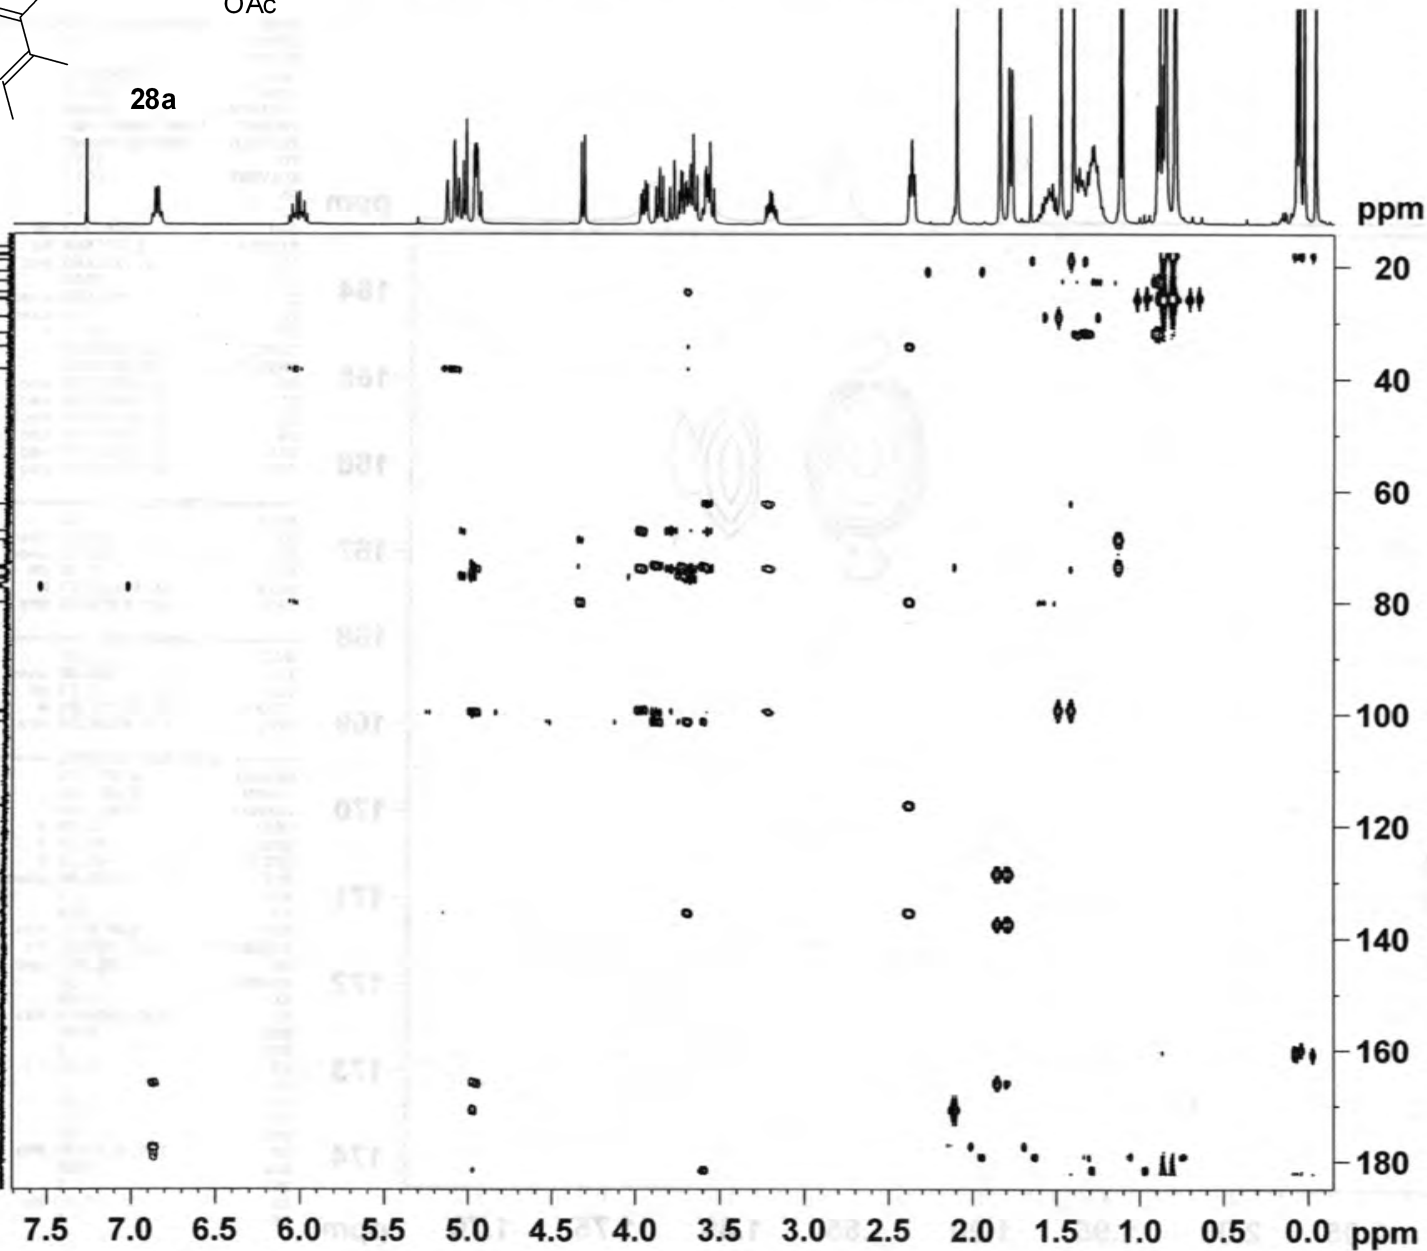

NAME ZGH-*Ipom*-1-170-B-140119  
 EXPNO 15  
 PROCNO 1  
 Date\_ 20141202  
 Time\_ 23.10  
 INSTRUM spect  
 PROBHD 5 mm PABBO BB-  
 PULPROG hmbcgp1pndqf  
 TD 4096  
 SOLVENT CDCl<sub>3</sub>  
 NS 70  
 DS 16  
 SWH 5208.333 Hz  
 FIDRES 1.271566 Hz  
 AQ 0.3932660 sec  
 RG 2050  
 DW 96.000 usec  
 DE 6.50 usec  
 TE 292.4 K  
 CNST2 145.0000000  
 CNST13 10.0000000  
 D0 0.00000300 sec  
 D1 1.50000000 sec  
 D2 0.00344828 sec  
 D6 0.05000000 sec  
 D16 0.00020000 sec  
 INO 0.00003010 sec

===== CHANNEL f1 =====  
 NUC1 1H  
 P1 10.00 usec  
 P2 20.00 usec  
 PL1 -3.50 dB  
 PL1W 31.17620277 W  
 SFO1 400.1325208 MHz

===== CHANNEL f2 =====  
 NUC2 13C  
 P3 10.00 usec  
 PL2 -2.10 dB  
 PL2W 58.37759399 W  
 SFO2 100.6228138 MHz

===== GRADIENT CHANNEL =====  
 GPNAM1 SINE.100  
 GPNAM2 SINE.100  
 GPNAM3 SINE.100  
 GPZ1 50.00 %  
 GPZ2 30.00 %  
 GPZ3 40.10 %  
 P16 1000.00 usec  
 ND0 2  
 TD 128  
 SFO1 100.6228 MHz  
 FIDRES 129.709091 Hz  
 SW 165.000 ppm  
 FhMODE QF  
 SI 2048  
 SF 400.1300000 MHz  
 WDW SINE  
 SSB 0  
 LB 0.00 Hz  
 GB 0  
 PC 4.00  
 SI 1024  
 MC2 QF  
 SF 100.6127690 MHz  
 WDW SINE  
 SSB 0  
 LB 0.00 Hz  
 GB 0

## ZGH-Ipom-1-173-A-131028 1H in CDCl3

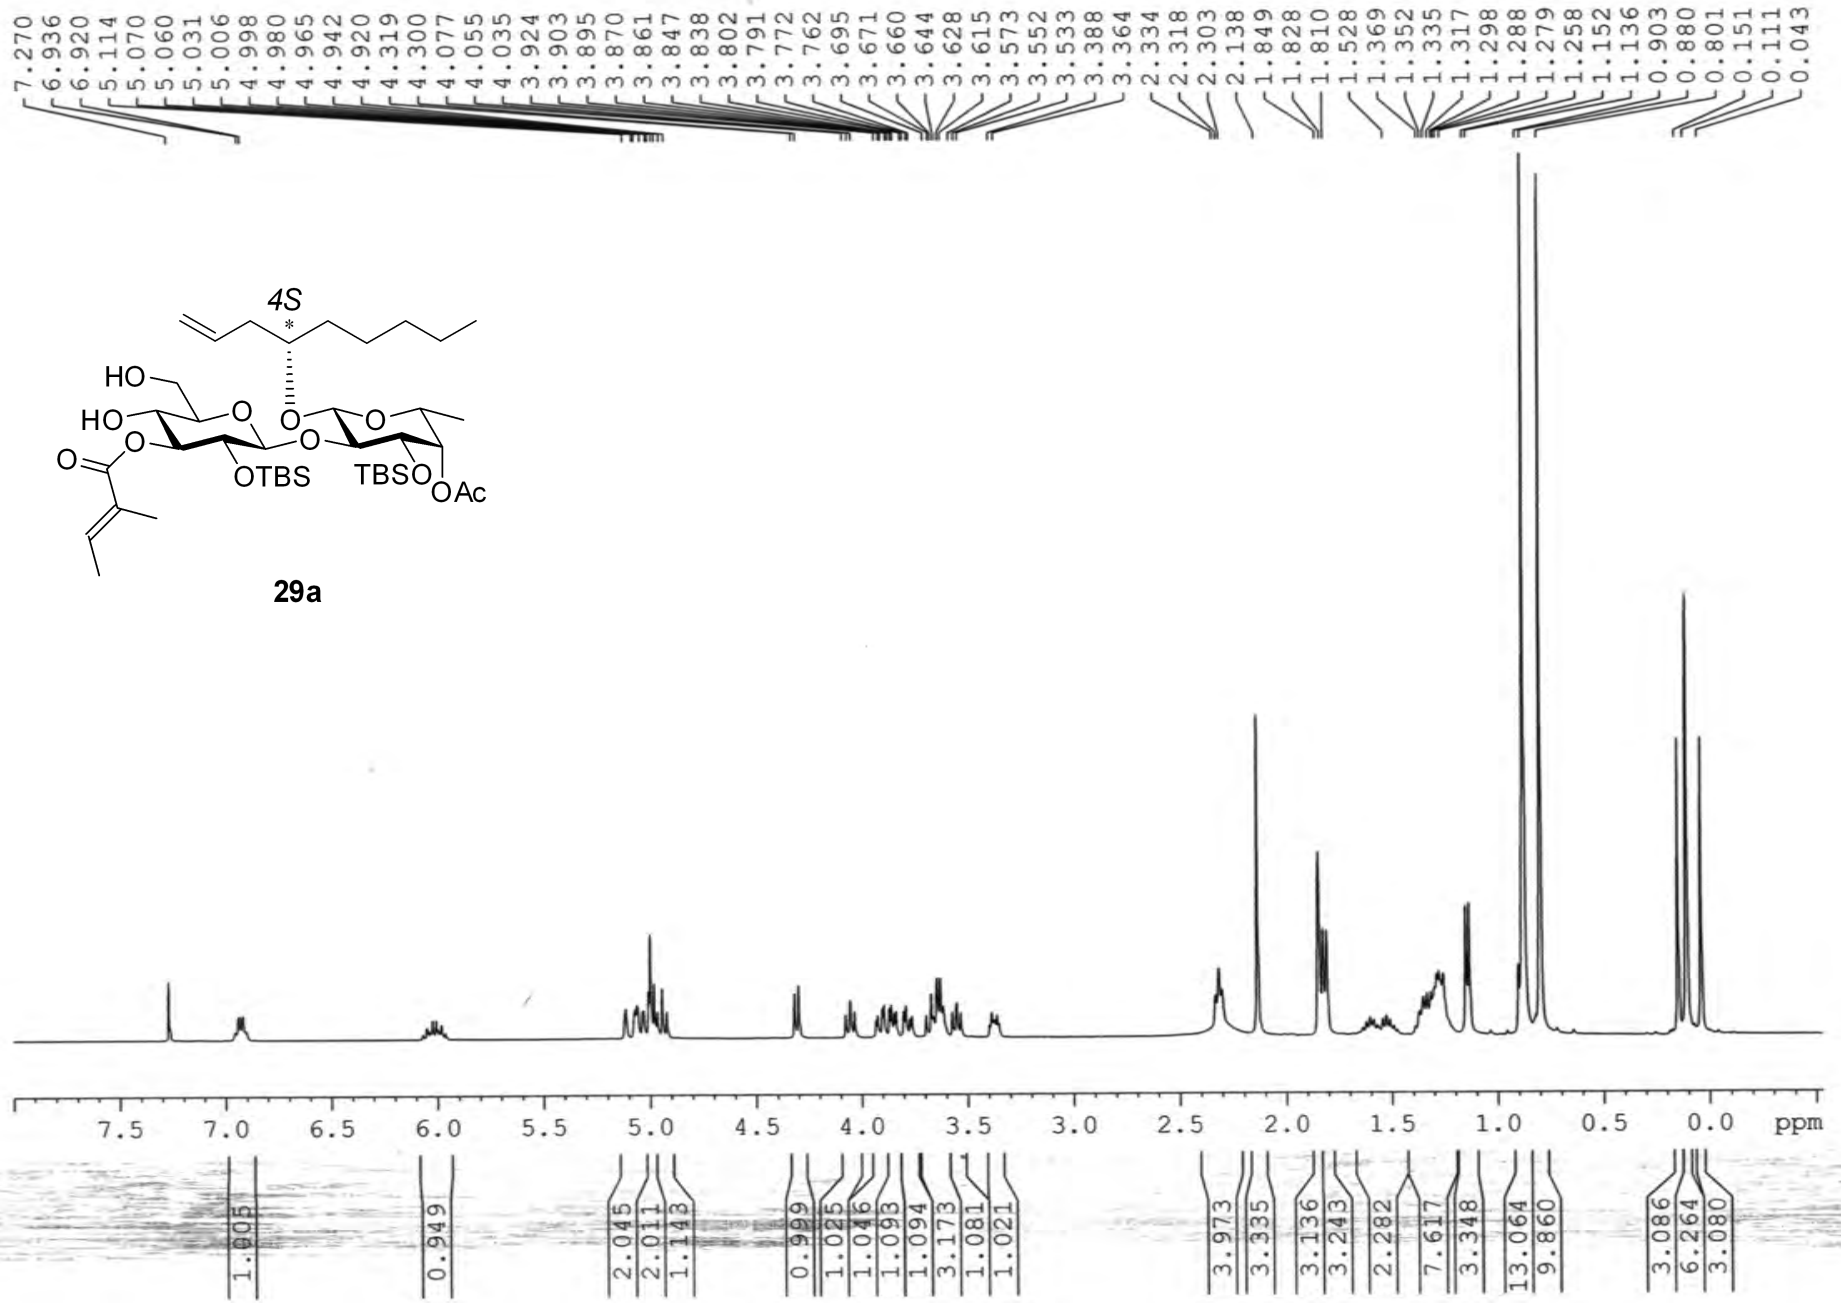

ZGH-Ipom-1-173-A-131028 <sup>13</sup>C in CDCl<sub>3</sub>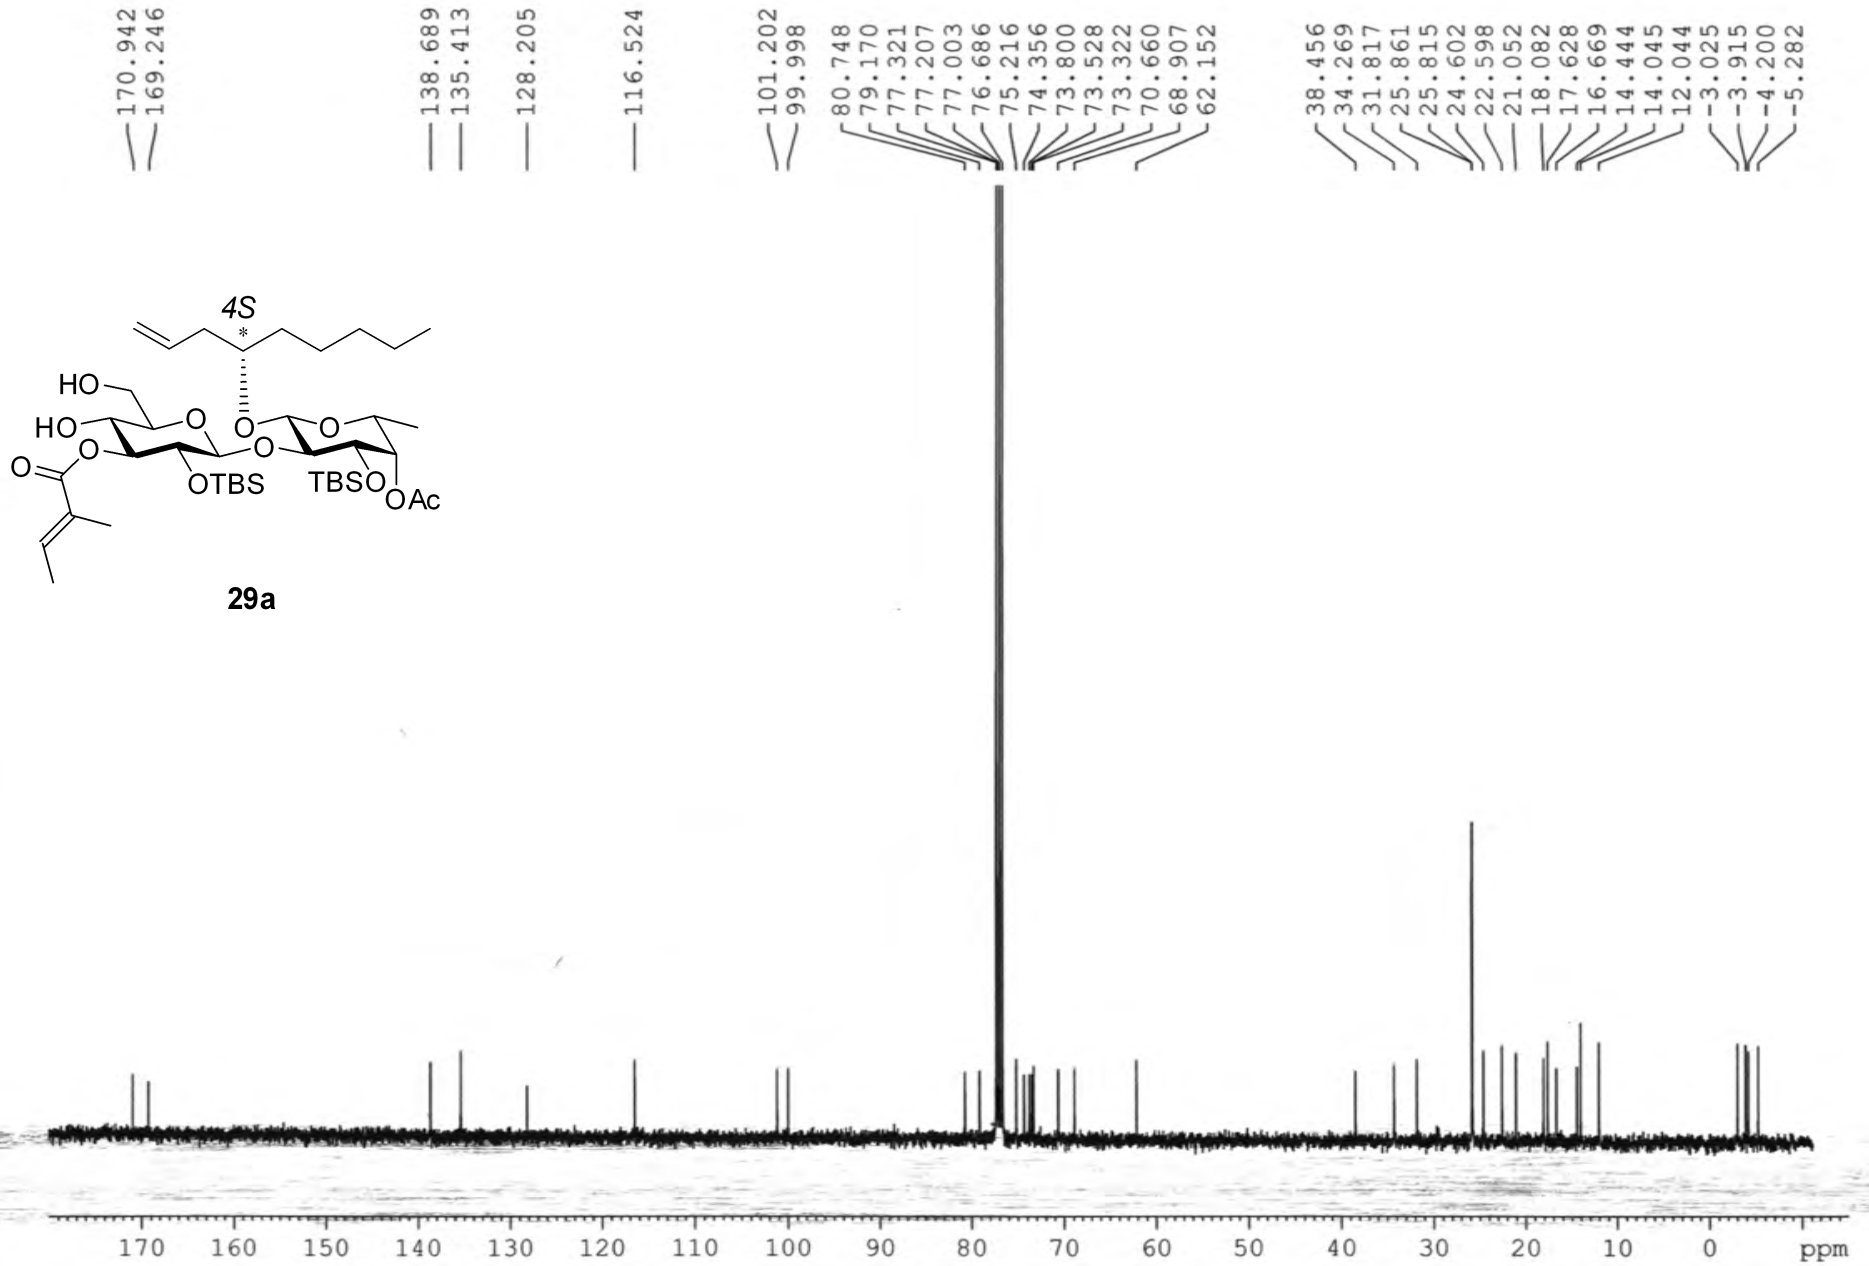

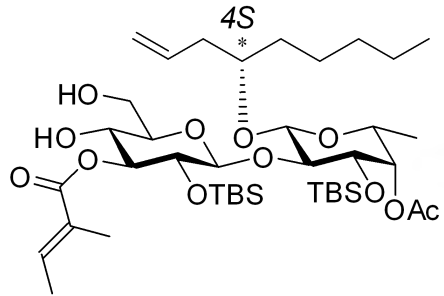

29a

ZGH-Ipom-1-173-A-131028 in CDC13 COSY

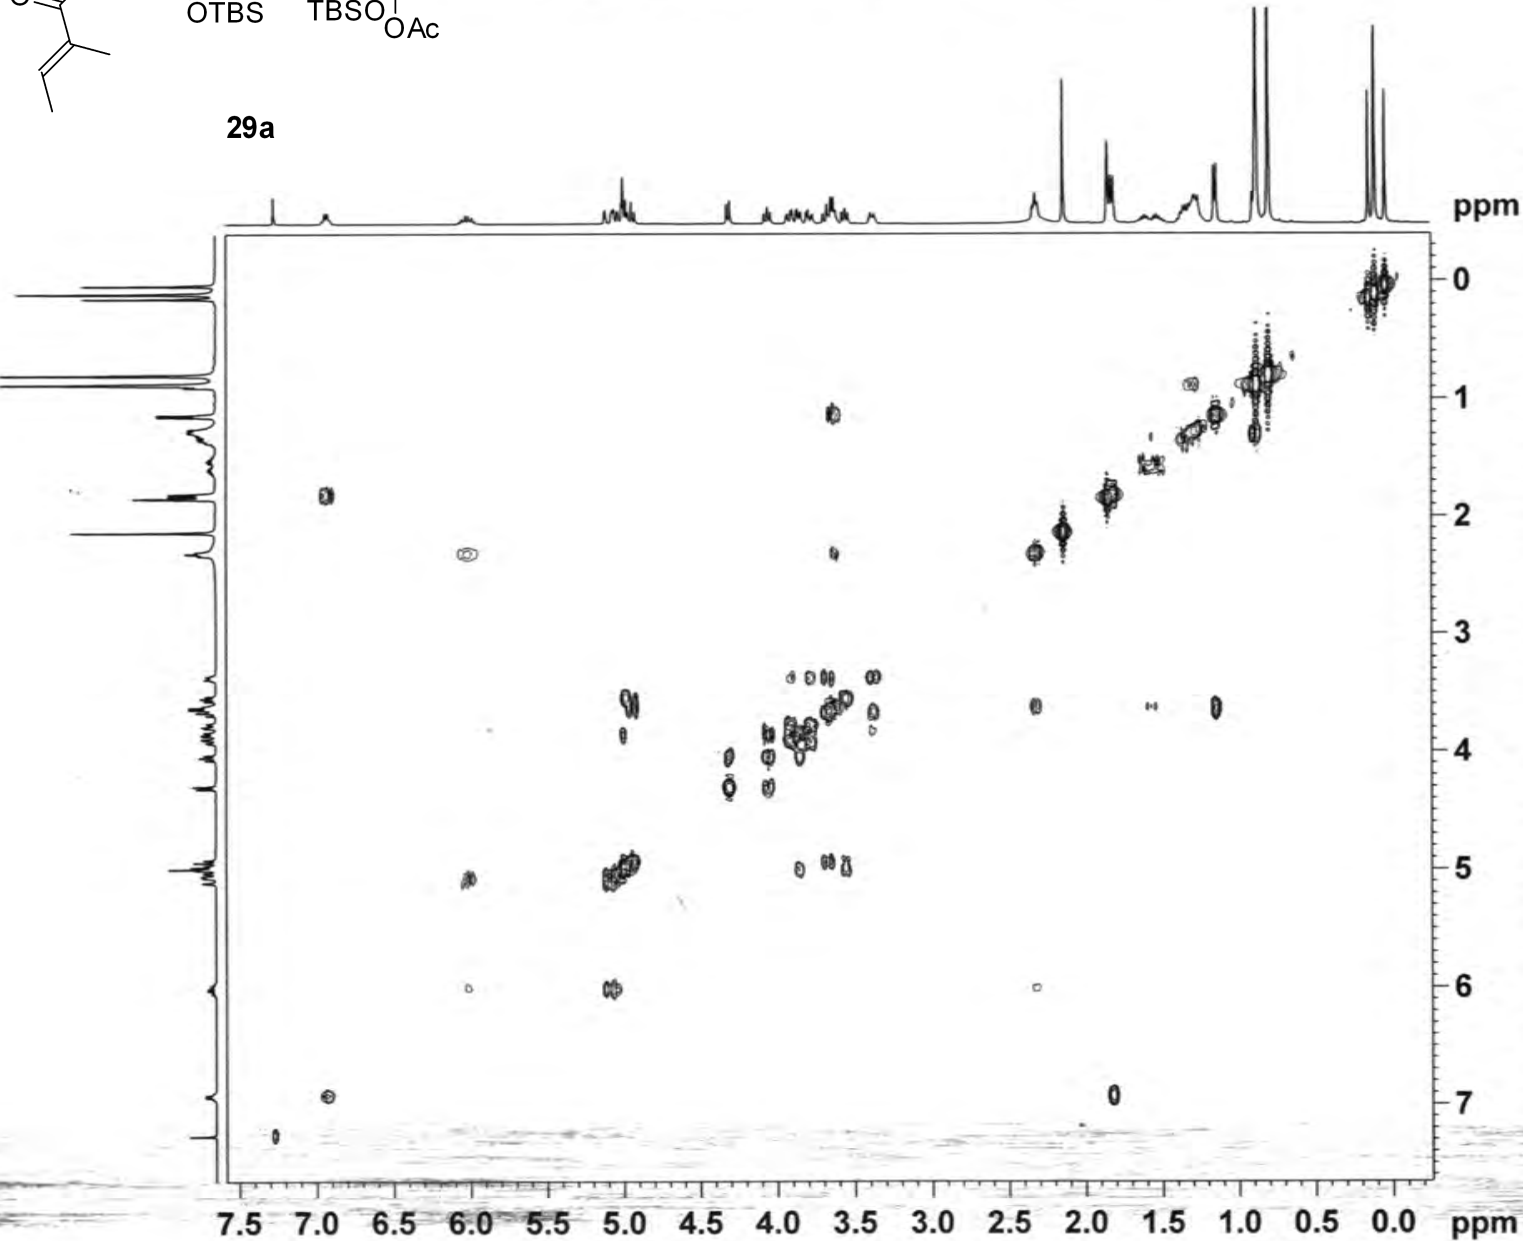

```

NAME      ZGH-Ipom-1-173-A-131028
EXPNO     3
PROCNO    1
Date_     20131031
Time      14.15
INSTRUM   spect
PROBHD    5 mm PABBO BB-
PULPROG   cosygpgf
TD         2048
SOLVENT   CDC13
NS         2
DS         8
SWH        5341.880 Hz
FIDRES     2.608340 Hz
AQ         0.1917428 sec
RG         114
DW         93.600 usec
DE         6.50 usec
TE         292.5 K
D0         0.00000300 sec
D1         1.48689198 sec
D13        0.00000400 sec
D16        0.00020000 sec
IN0        0.00018720 sec

```

```

===== CHANNEL f1 =====
NUC1      1H
P0         10.00 usec
P1         10.00 usec
PL1        -3.50 dB
PL1W       31.17620277 W
SFO1       400.1324057 MHz

```

```

===== GRADIENT CHANNEL =====
GPNAM1    SINE.100
GPZ1       10.00 %
P16        1000.00 usec
ND0         1
TD          128
SFO1       400.1324 MHz
FIDRES     41.733440 Hz
SW         13.350 ppm
FnMODE     QF
SI          1024
SF         400.1300040 MHz
WDW         SINE
SSB         0
LB          0.00 Hz
GB          0
PC          1.00
SI          1024
MC2        QF
SF         400.1300033 MHz
WDW         SINE
SSB         0
LB          0.00 Hz
GB          0

```



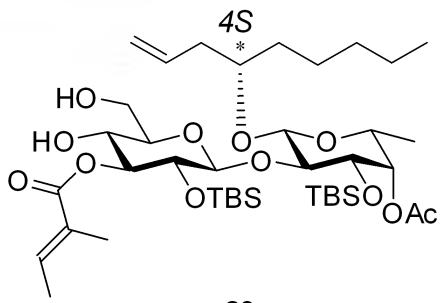

ZGH-*Ipom*-1-173-A-131028 HSQC

29a

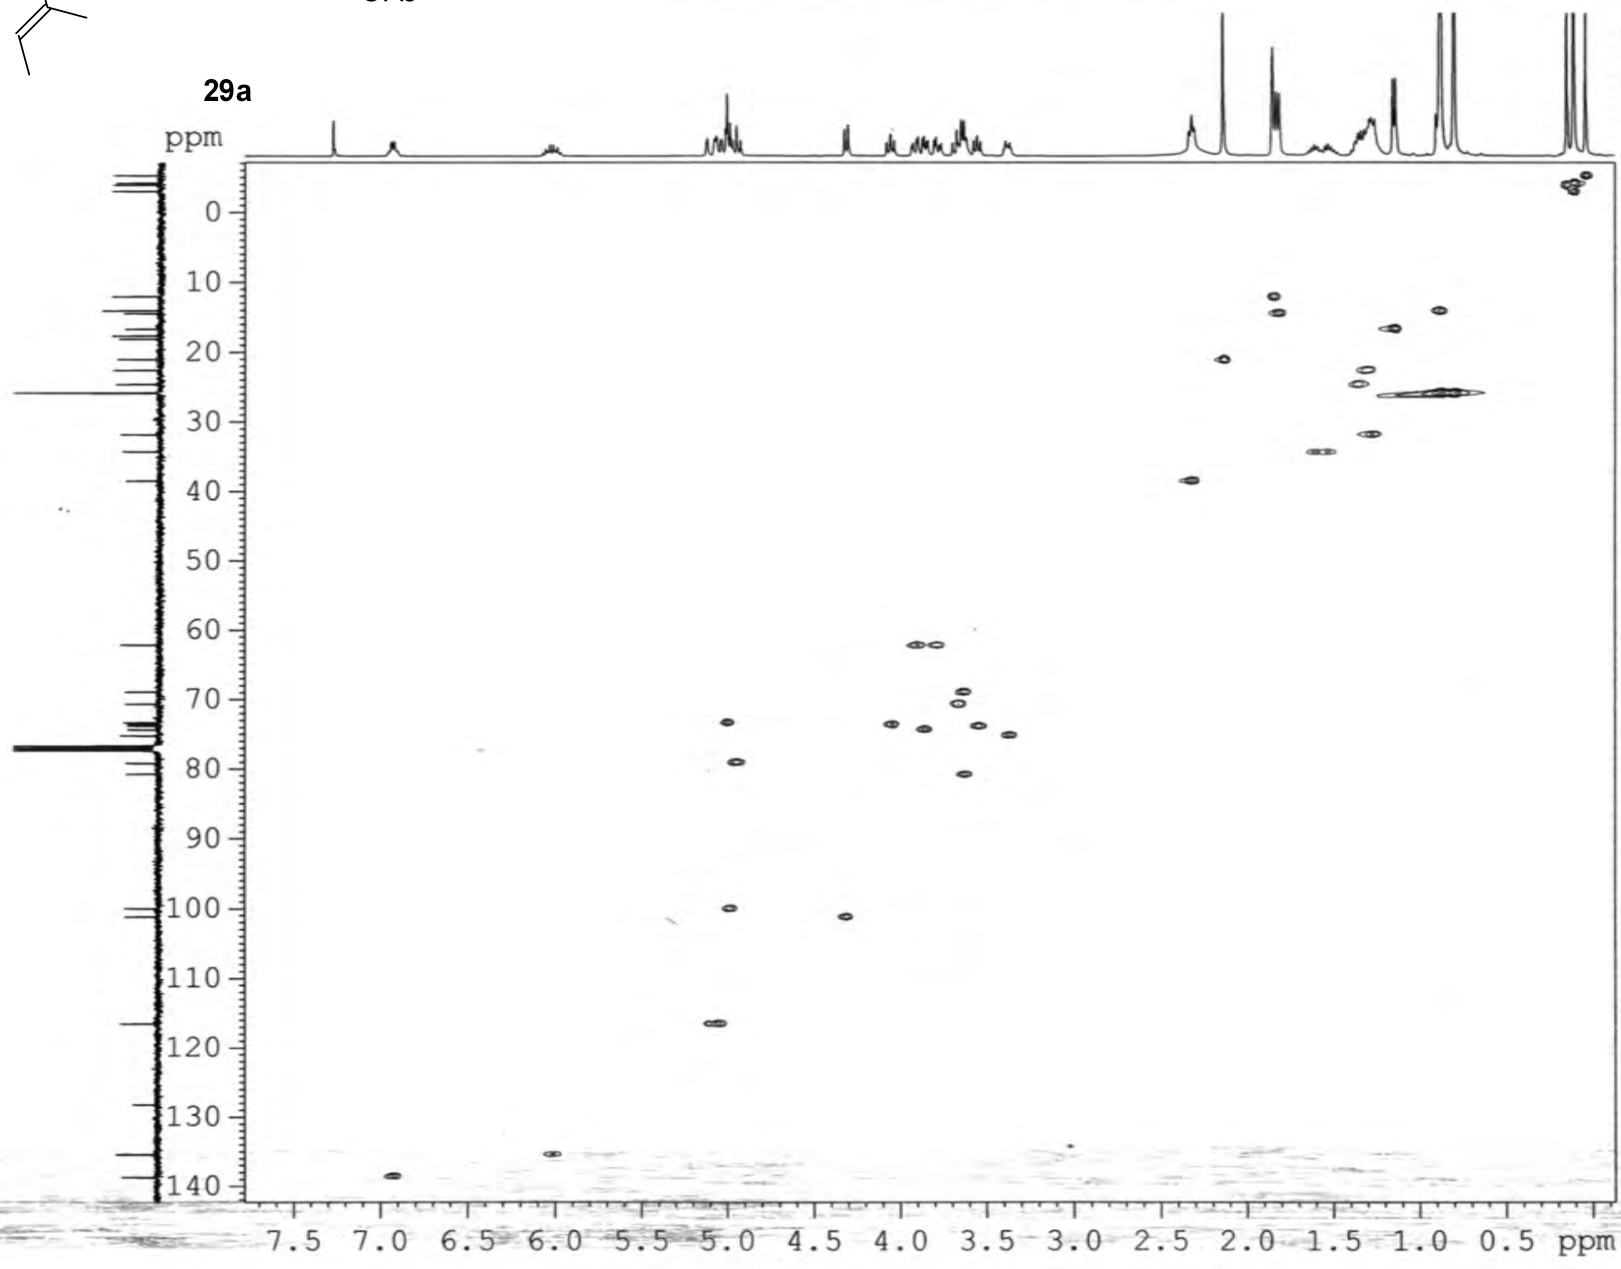

NAME ZGH-*Ipom*-1-173-A-131028  
EXPNO 4  
PROCNO 1  
Date\_ 20150313  
Time 23.40  
INSTRUM spect  
PROBHD 5 mm PABBO BB-  
PULPROG hsqcetgpsi  
TD 1024  
SOLVENT CDCl3  
NS 4  
DS 16  
SWH 5341.880 Hz  
FIDRES 5.216680 Hz  
AQ 0.0958964 sec  
RG 2050  
DW 93.600 usec  
DE 6.50 usec  
TE 292.0 K  
CNST2 145.0000000  
DO 0.00000300 sec  
D1 1.50000000 sec  
D4 0.00172414 sec  
D11 0.03000000 sec  
D13 0.00000400 sec  
D16 0.00020000 sec  
D24 0.00110000 sec  
INO 0.00003000 sec  
ZGPTNS

==== CHANNEL f1 =====  
NUC1 1H  
P1 10.00 usec  
P2 20.00 usec  
P2# 1000.00 usec  
PL1 -3.50 dB  
PL1W 31.17620277 W  
SFO1 400.1324057 MHz

==== CHANNEL f2 =====  
CPDPRG2 garp  
NUC2 13C  
P3 10.00 usec  
P4 20.00 usec  
PCPD2 75.00 usec  
PL2 -2.10 dB  
PL12 15.40 dB  
PL2W 58.37759399 W  
PL12W 1.03811681 W  
SFO2 100.6202727 MHz

===== GRADIENT CHANNEL =====  
GPNAM1 SINE.100  
GPNAM2 SINE.100  
GPZ1 80.00 %  
GPZ2 20.10 %  
P16 1000.00 usec  
ND0 2  
TD 256  
SFO1 100.6203 MHz  
FIDRES 65.104164 Hz  
SW 165.639 ppm  
FrMODE Echo-Antiecho  
SI 1024  
SF 400.1300000 MHz  
WDW QSINE  
SSB 2  
LB 0.00 Hz  
GB 0  
PC 1.00  
SI -1024  
MC2 echo-antiecho  
SF 100.6127690 MHz  
WDW QSINE  
SSB 2  
LB 0.00 Hz  
GB 0

EDB-Ipom-1-56-A-140714 in CDCL3

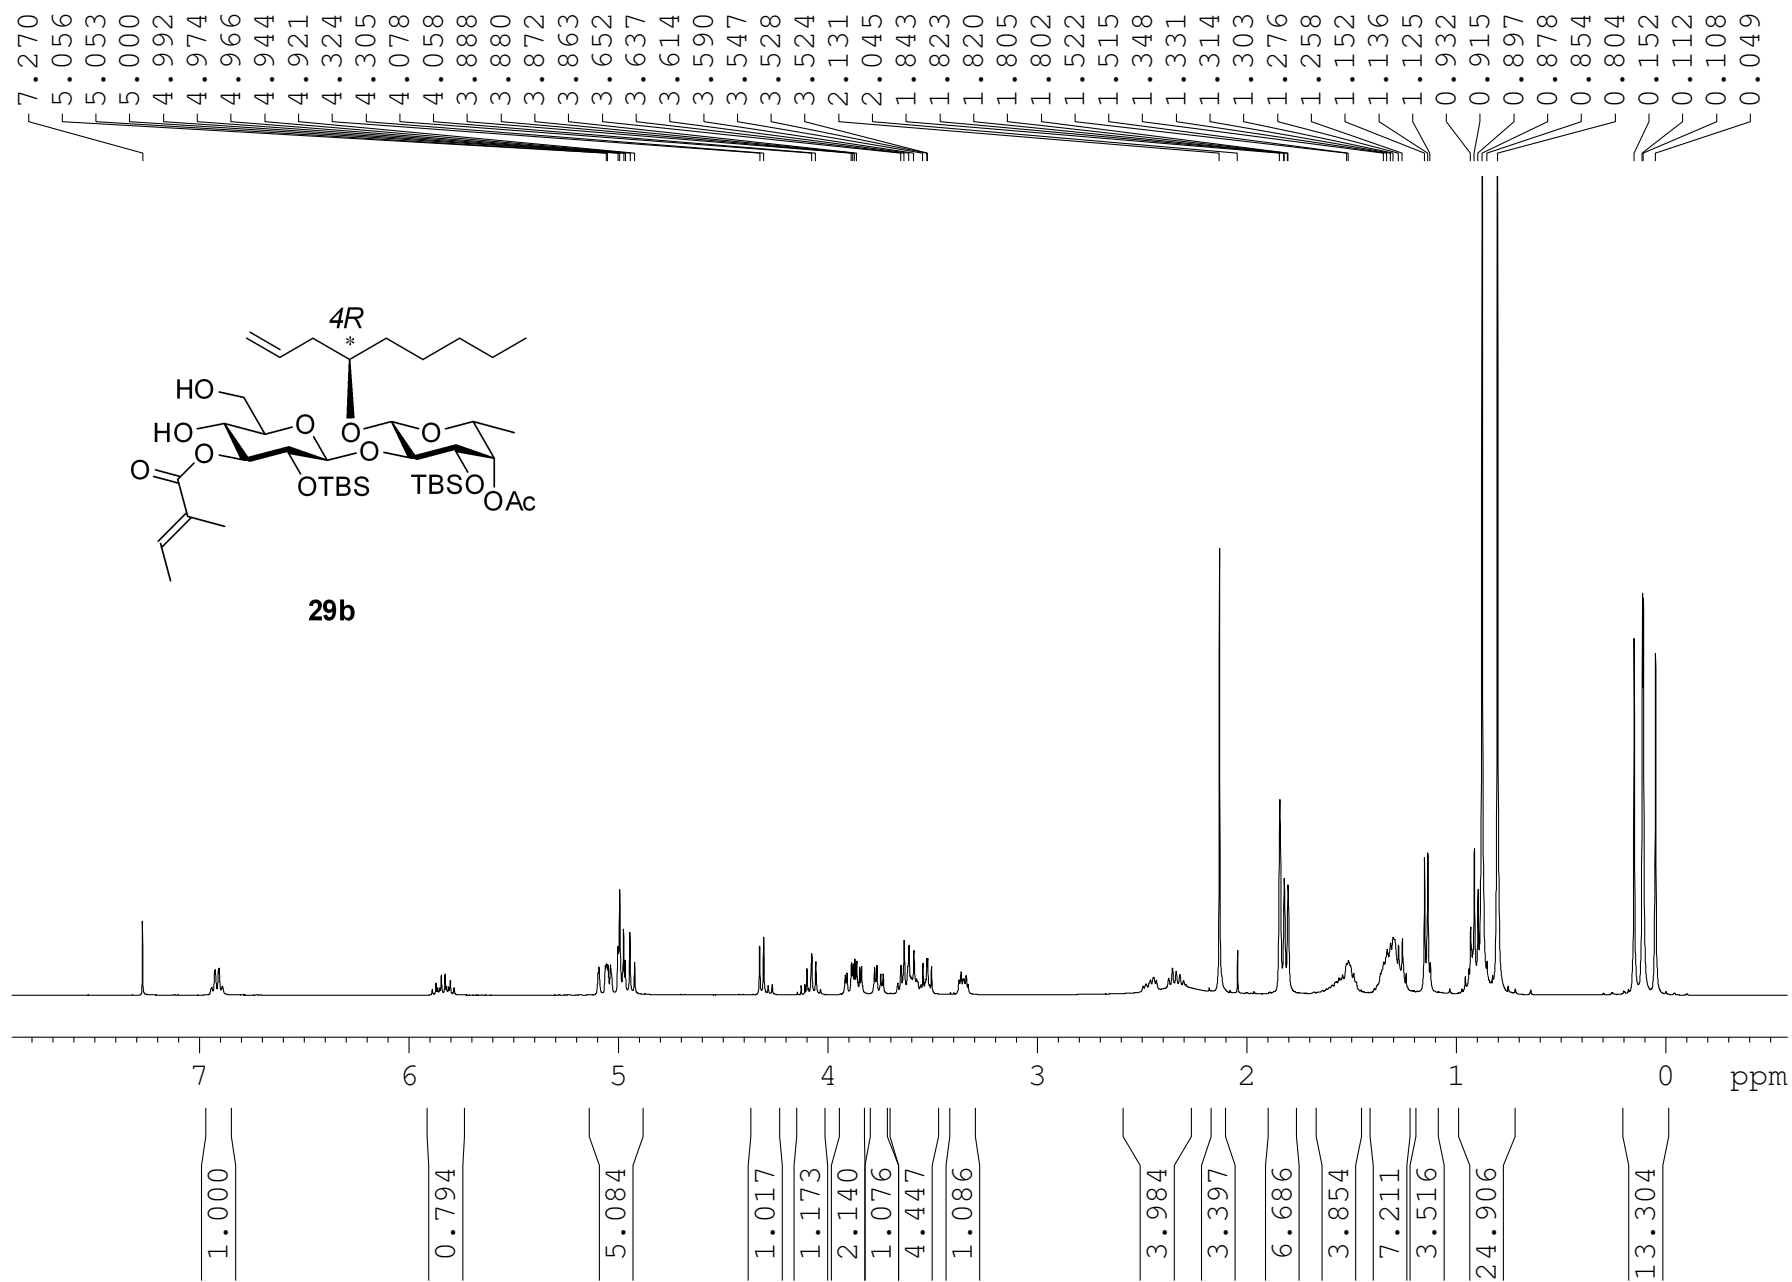

EDB-Ipom-1-56-A-140714 13C in CDCl3

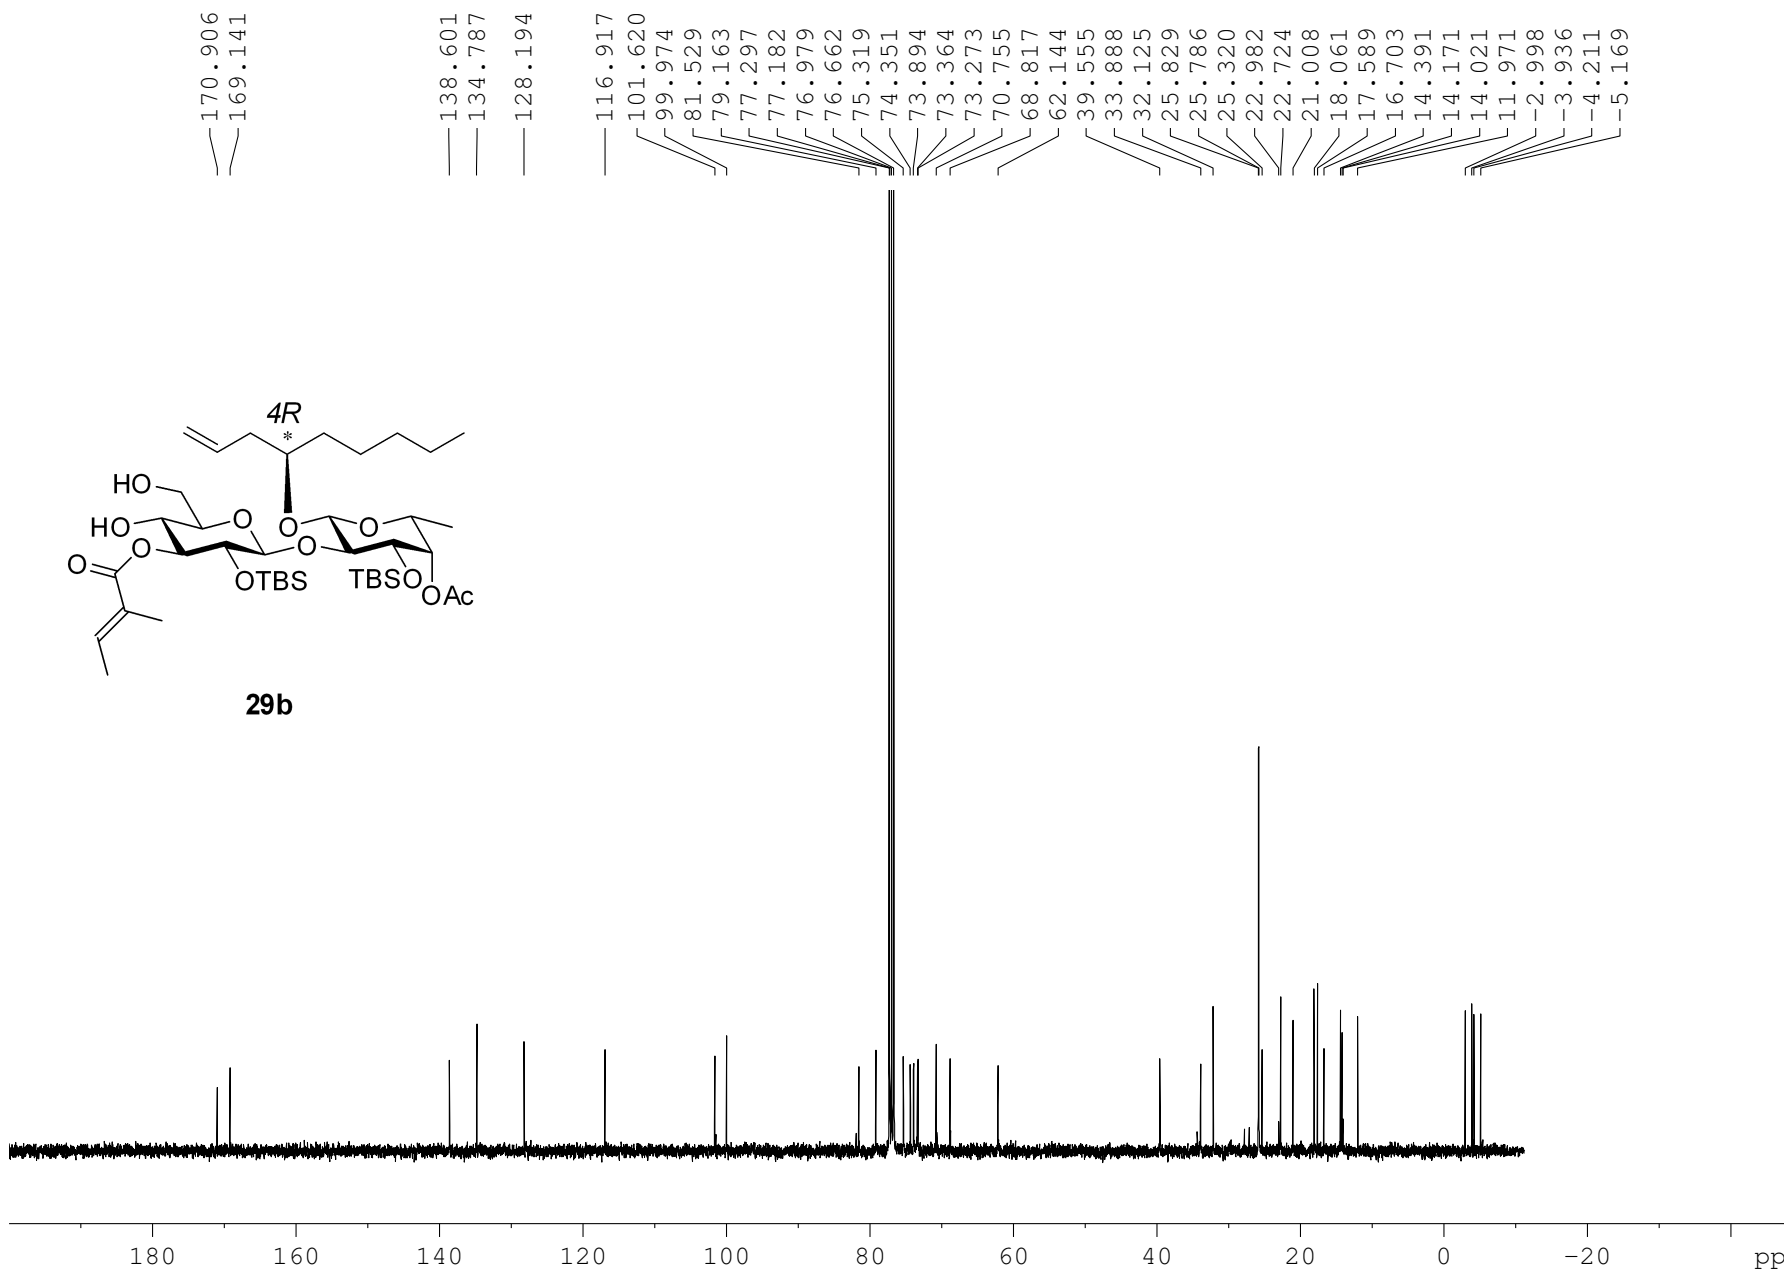

EDB-Ipom-1-67-A-140812 in CDCl3

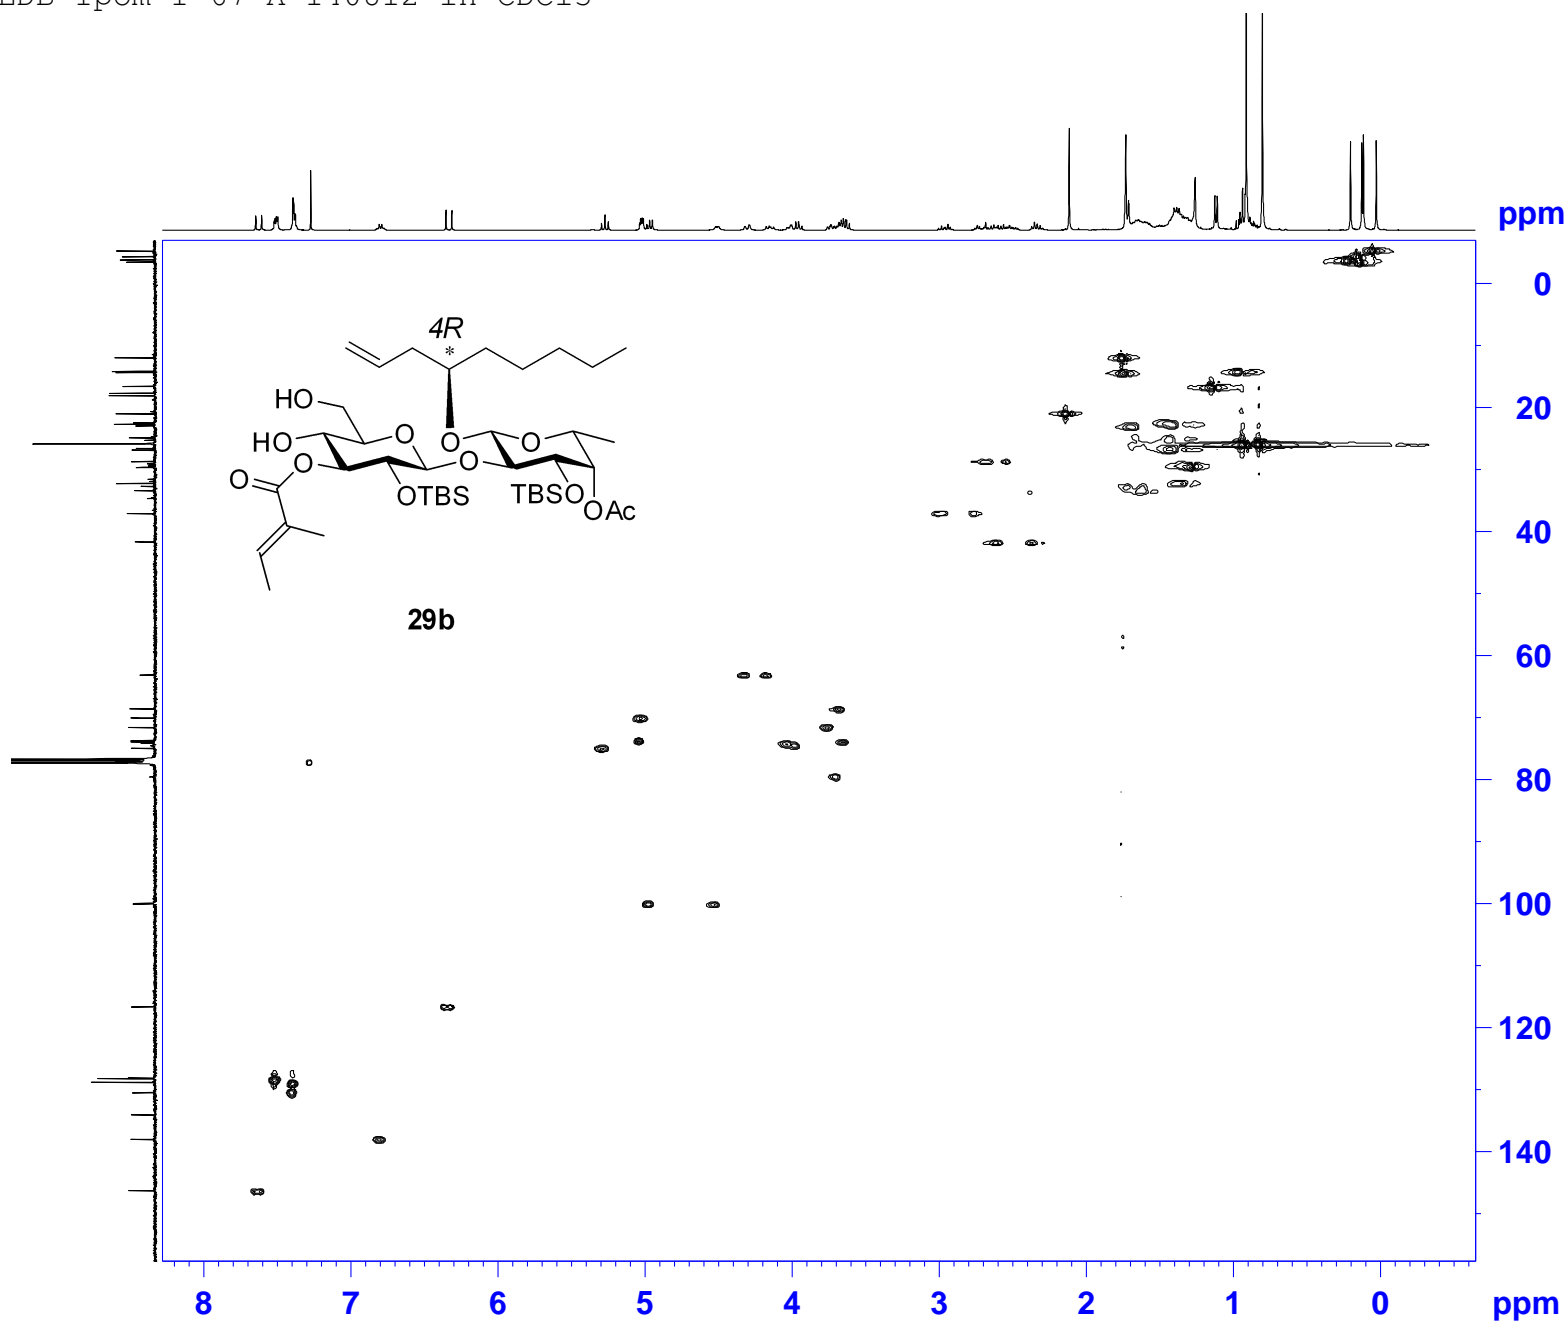

```

NAME      EDB-Ipom-1-67-A-140812
EXPNO     4
PROCNO    1
Date_     20140828
Time      5.20
INSTRUM   spect
PROBHD    5 mm PABBO BB-
PULPROG   hsqcetgpsi
TD         1024
SOLVENT   CDCl3
NS         2
DS         16
SWH        5341.880 Hz
FIDRES     5.216680 Hz
AQ         0.0958964 sec
RG         2050
DW         93.600 usec
DE         6.50 usec
TE         293.2 K
CNST2     145.0000000
D0         0.00000300 sec
D1         1.50000000 sec
D4         0.00172414 sec
D11        0.03000000 sec
D13        0.00000400 sec
D16        0.00020000 sec
D24        0.00110000 sec
IN0        0.00003000 sec
ZGPTNS

===== CHANNEL f1 =====
NUC1       1H
P1         10.00 usec
P2         20.00 usec
P28        1000.00 usec
PL1        -3.50 dB
PL1W       31.17620277 W
SFO1       400.1324057 MHz

===== CHANNEL f2 =====
CPDPRG2    garp
NUC2       13C
P3         10.00 usec
P4         20.00 usec
PCPD2      75.00 usec
PL2        -2.10 dB
PL12       15.40 dB
PL2W       58.37759399 W
PL12W      1.03811681 W
SFO2       100.6202727 MHz

===== GRADIENT CHANNEL =====
GPNAM1     SINE.100
GPNAM2     SINE.100
GPZ1       80.00 %
GPZ2       20.10 %
P16        1000.00 usec
ND0        2
TD         256
SFO1       100.6203 MHz
FIDRES     65.104164 Hz
SW         165.639 ppm
FnMODE     Echo-Antiecho
SI         1024
SF         400.1300000 MHz
WDW        QSINE
SSB        2
LB         0.00 Hz
GB         0
PC         1.00
SI         1024
MC2        echo-antiecho
SF         100.6127690 MHz
WDW        QSINE
SSB        2
LB         0.00 Hz
GB         0

```

ZGH-*Ipom*-2-31-A-140203 1H in CDCl<sub>3</sub>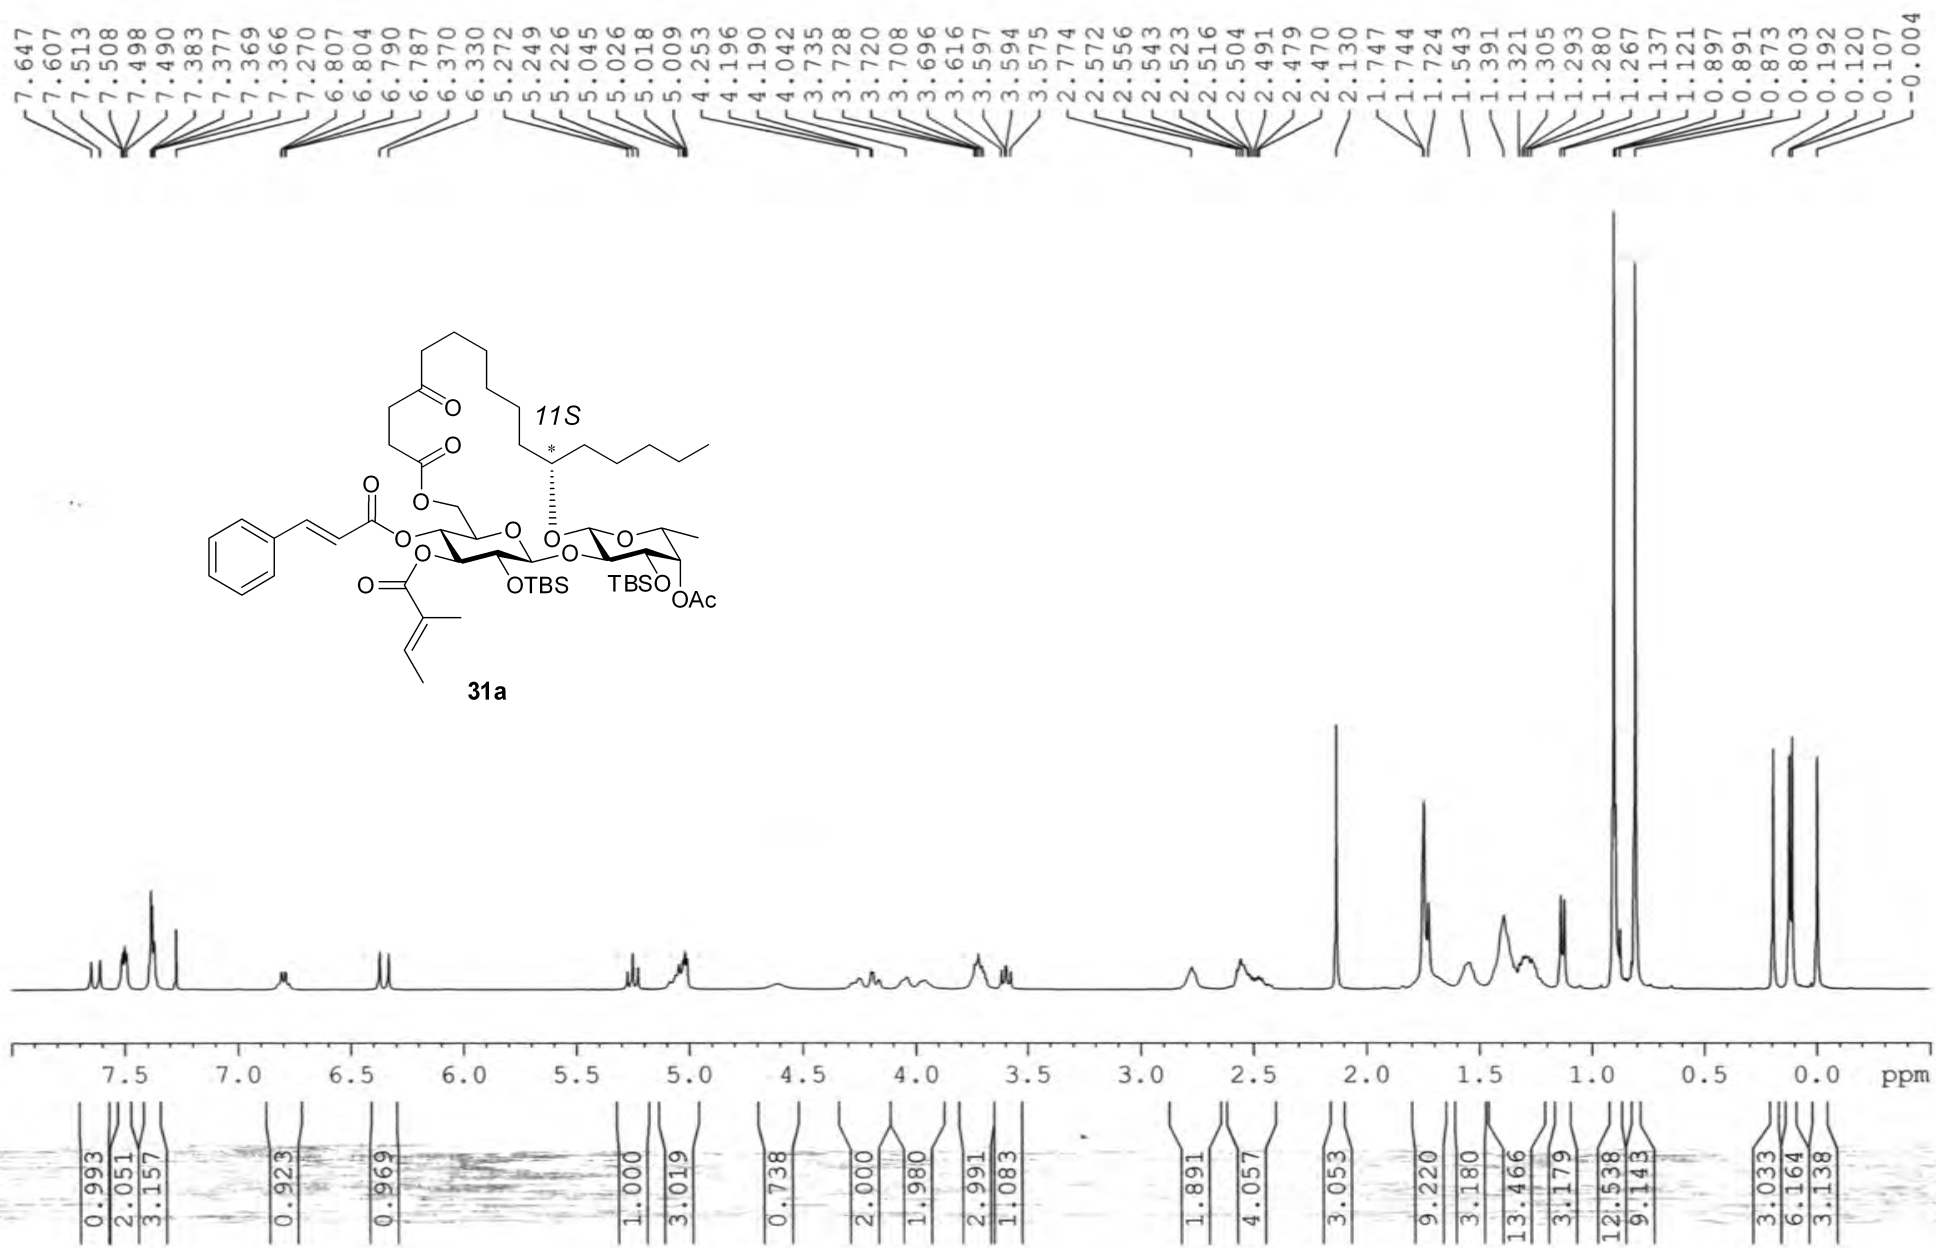

ZGH-Ipom-2-31-A-140203 <sup>13</sup>C in CDCl<sub>3</sub>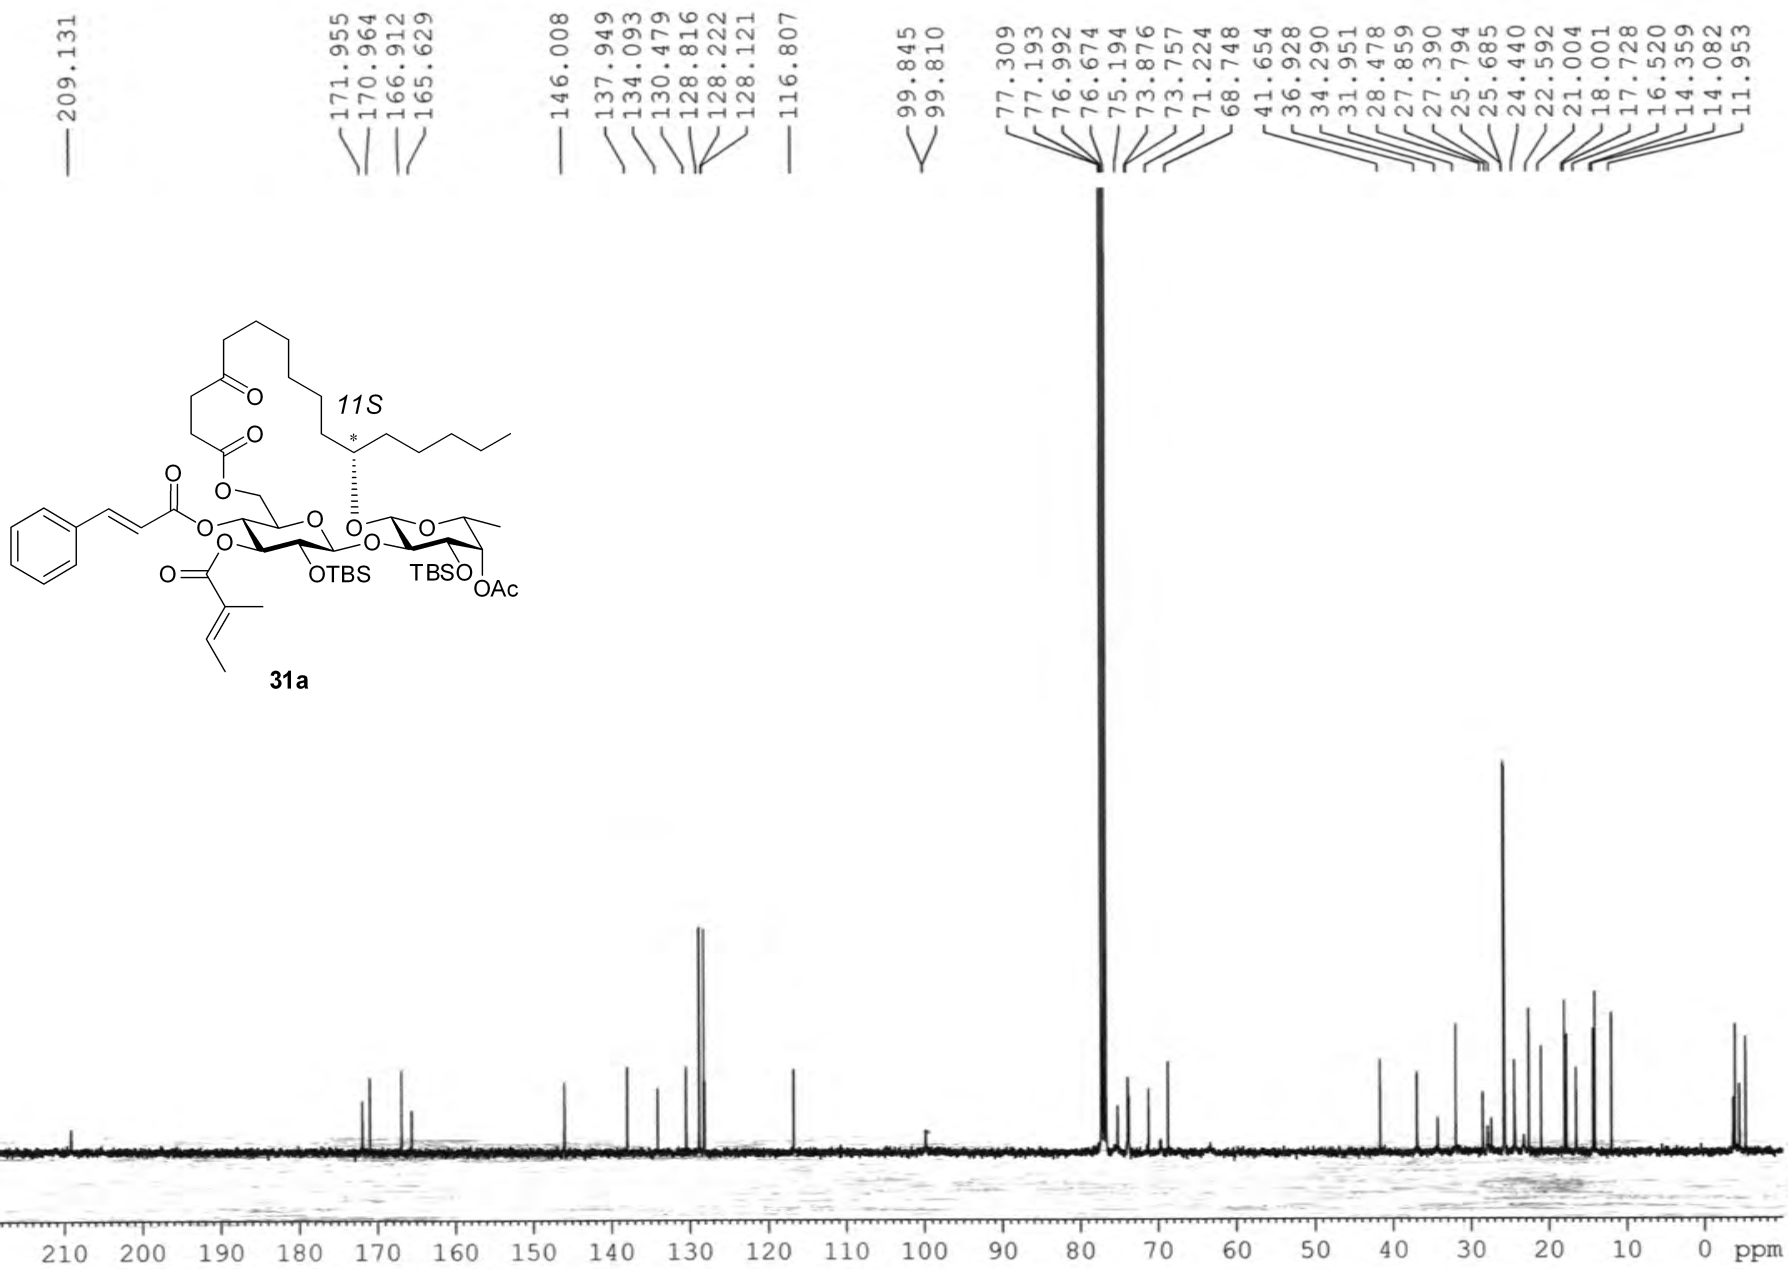

## ZGH-Ipom-2-31-A-140203 COSY

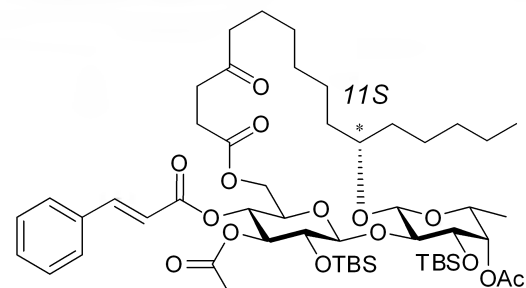

31a

ppm

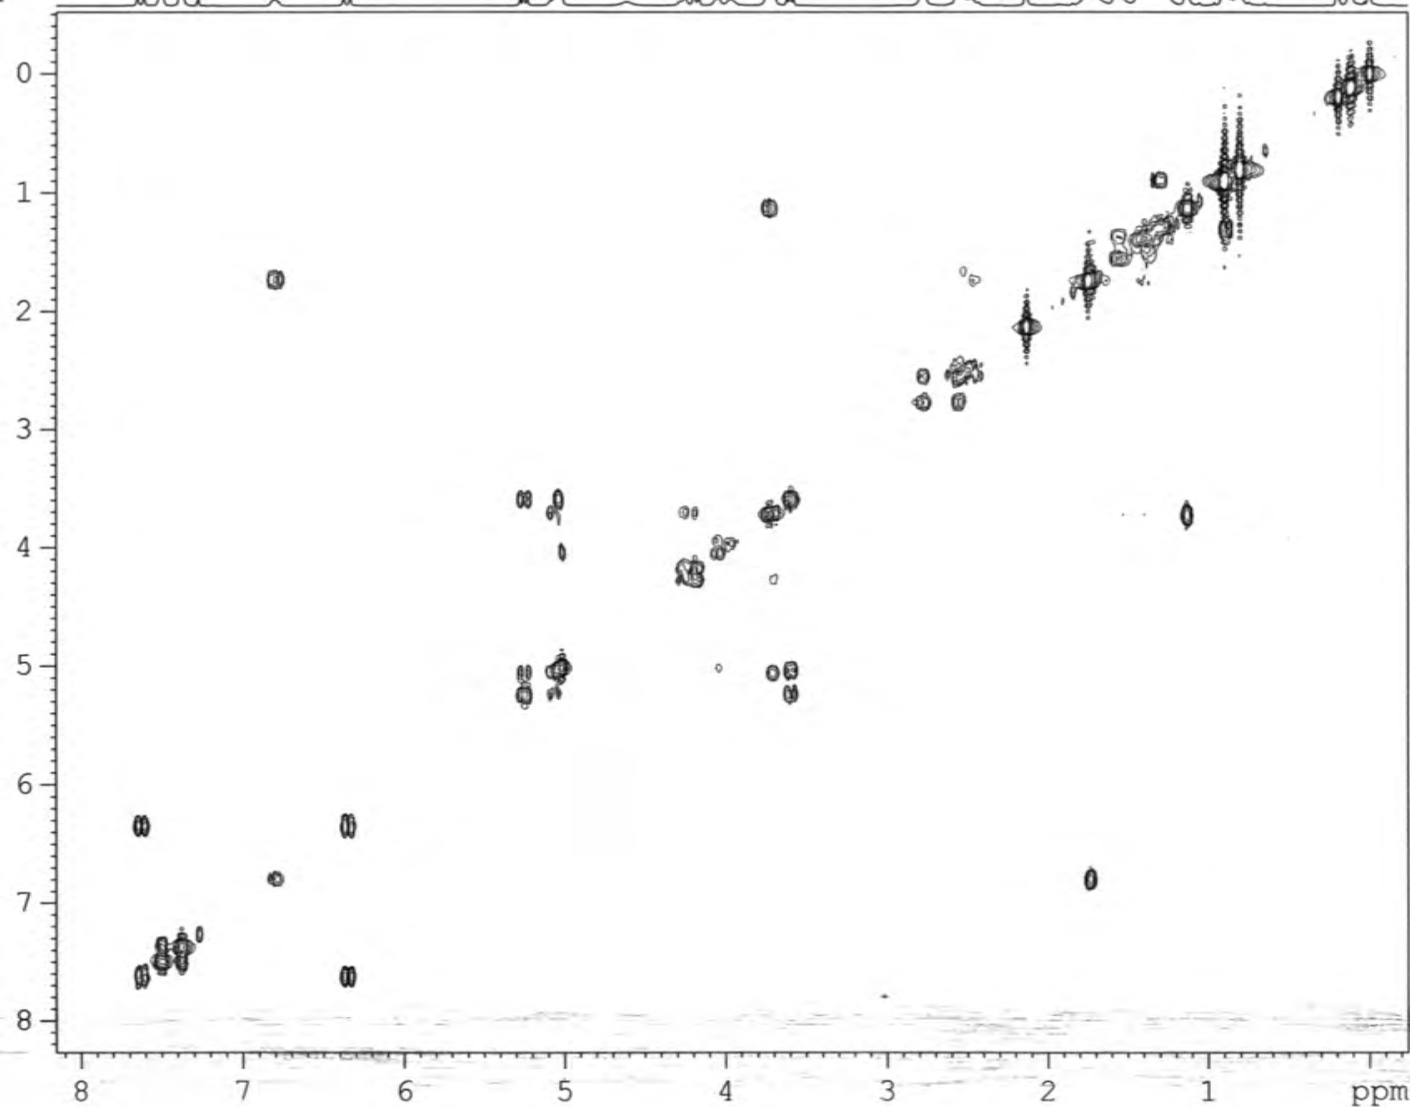

NAME ZGH-Ipom-2-31-A-140203  
 EXPNO 3  
 PROCNO 1  
 Date\_ 20140205  
 Time\_ 18.56  
 INSTRUM spect  
 PROBHD 5 mm PABBO BB-  
 PULPROG cosygppqf  
 TD 2048  
 SOLVENT CDCl3  
 NS 2  
 DS 8  
 SWH 5341.880 Hz  
 FIDRES 2.608340 Hz  
 AQ 0.1917428 sec  
 RG 50.8  
 DW 93.600 usec  
 DE 6.50 usec  
 TE 292.4 K  
 D0 0.00000300 sec  
 D1 1.48689198 sec  
 D13 0.00000400 sec  
 D16 0.00020000 sec  
 IN0 0.00018720 sec

----- CHANNEL f1 -----

NUC1 1H  
 P0 10.00 usec  
 P1 10.00 usec  
 PL1 -3.50 dB  
 PL1W 31.17620277 W  
 SFO1 400.1324057 MHz

----- GRADIENT CHANNEL -----

GPNAME1 SINE.100  
 GPZ1 10.00 %  
 P16 1000.00 usec  
 ND0 1  
 TD 128  
 SFO1 400.1324 MHz  
 FIDRES 41.733440 Hz  
 SW 13.350 ppm  
 FMODE QF  
 SI 1024  
 SF 400.1300040 MHz  
 WDW SINE  
 SSB 0  
 LB 0.00 Hz  
 GB 0  
 PC 1.00  
 SI 1024  
 MC2 QF  
 SF 400.1300033 MHz  
 WDW SINE  
 SSB 0  
 LB 0.00 Hz  
 GB 0

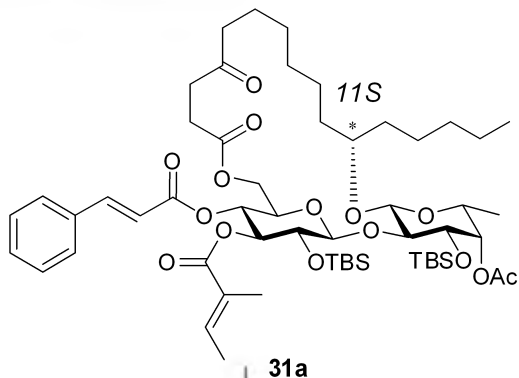ZGH-*Ipom*-2-31-A-140203 HSQC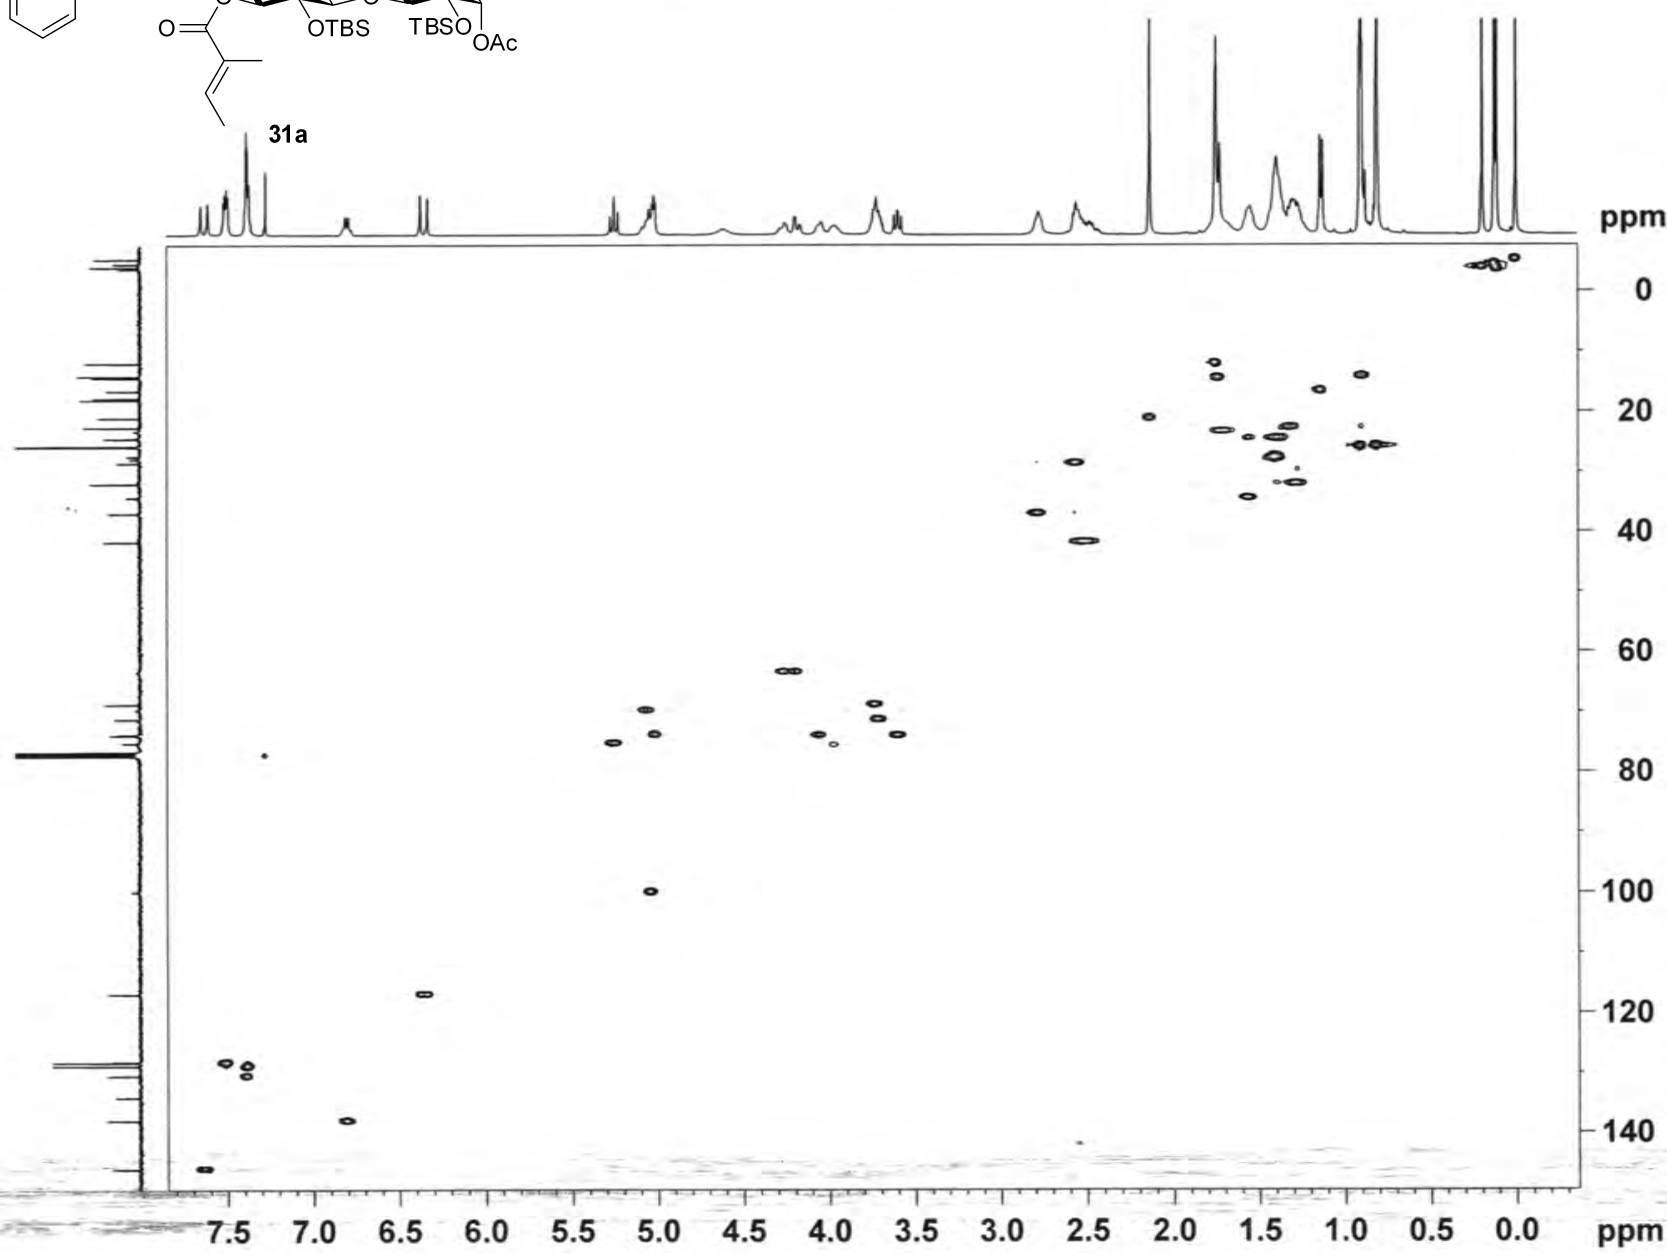

```

NAME      ZGH-Ipom-2-31-A-140203
EXPNO     4
PROCNO    1
Date_     20140205
Time      19.06
INSTRUM   spect
PROBHD    5 mm PABBO BB-
PULPROG   hsqcetgpsi
TD         1024
SOLVENT   CDCl3
NS         8
DS         16
SWH        5341.880 Hz
FIDRES     5.216680 Hz
AQ         0.0958964 sec
RG         2050
DW         93.600 usec
DE         6.50 usec
TE         292.4 K
CNST2     145.0000000
D0         0.00000300 sec
D1         1.50000000 sec
D4         0.00172414 sec
D11        0.03000000 sec
D13        0.00000400 sec
D16        0.00020000 sec
D24        0.00110000 sec
IN0        0.00003000 sec
ZGPTNS

```

```

----- CHANNEL f1 -----
NUC1      1H
P1        10.00 usec
P2        20.00 usec
P2#       1000.00 usec
PL1       -3.50 dB
PL1W      31.17620277 W
SFO1      400.1324057 MHz

```

```

----- CHANNEL f2 -----
CPDPRG2   garp
NUC2      13C
P3        10.00 usec
P4        20.00 usec
PCPD2     75.00 usec
PL2       -2.10 dB
PL12      15.40 dB
PL2W      58.37759399 W
PL12W     1.03811681 W
SFO2      100.6202727 MHz

```

```

----- GRADIENT CHANNEL -----
GPNAM1    SINE.100
GPNAM2    SINE.100
GPZ1      80.00 %
GPZ2      20.10 %
P16       1000.00 usec
ND0       2
TD        256
SFO1      100.6203 MHz
FIDRES    65.104164 Hz
SW        165.639 ppm
FnMODE    Echo-Antiecho
SI        1024
SF        400.1300000 MHz
WDW       QSINE
SSB       2
LB        0.00 Hz
GB        0
PC        1.00
SI        1024
MC2       echo-antiecho
SF        100.6127690 MHz
WDW       QSINE
SSB       2
LB        0.00 Hz
GB        0

```



## EDB-Ipom-1-67-A-140812 in CDCL3

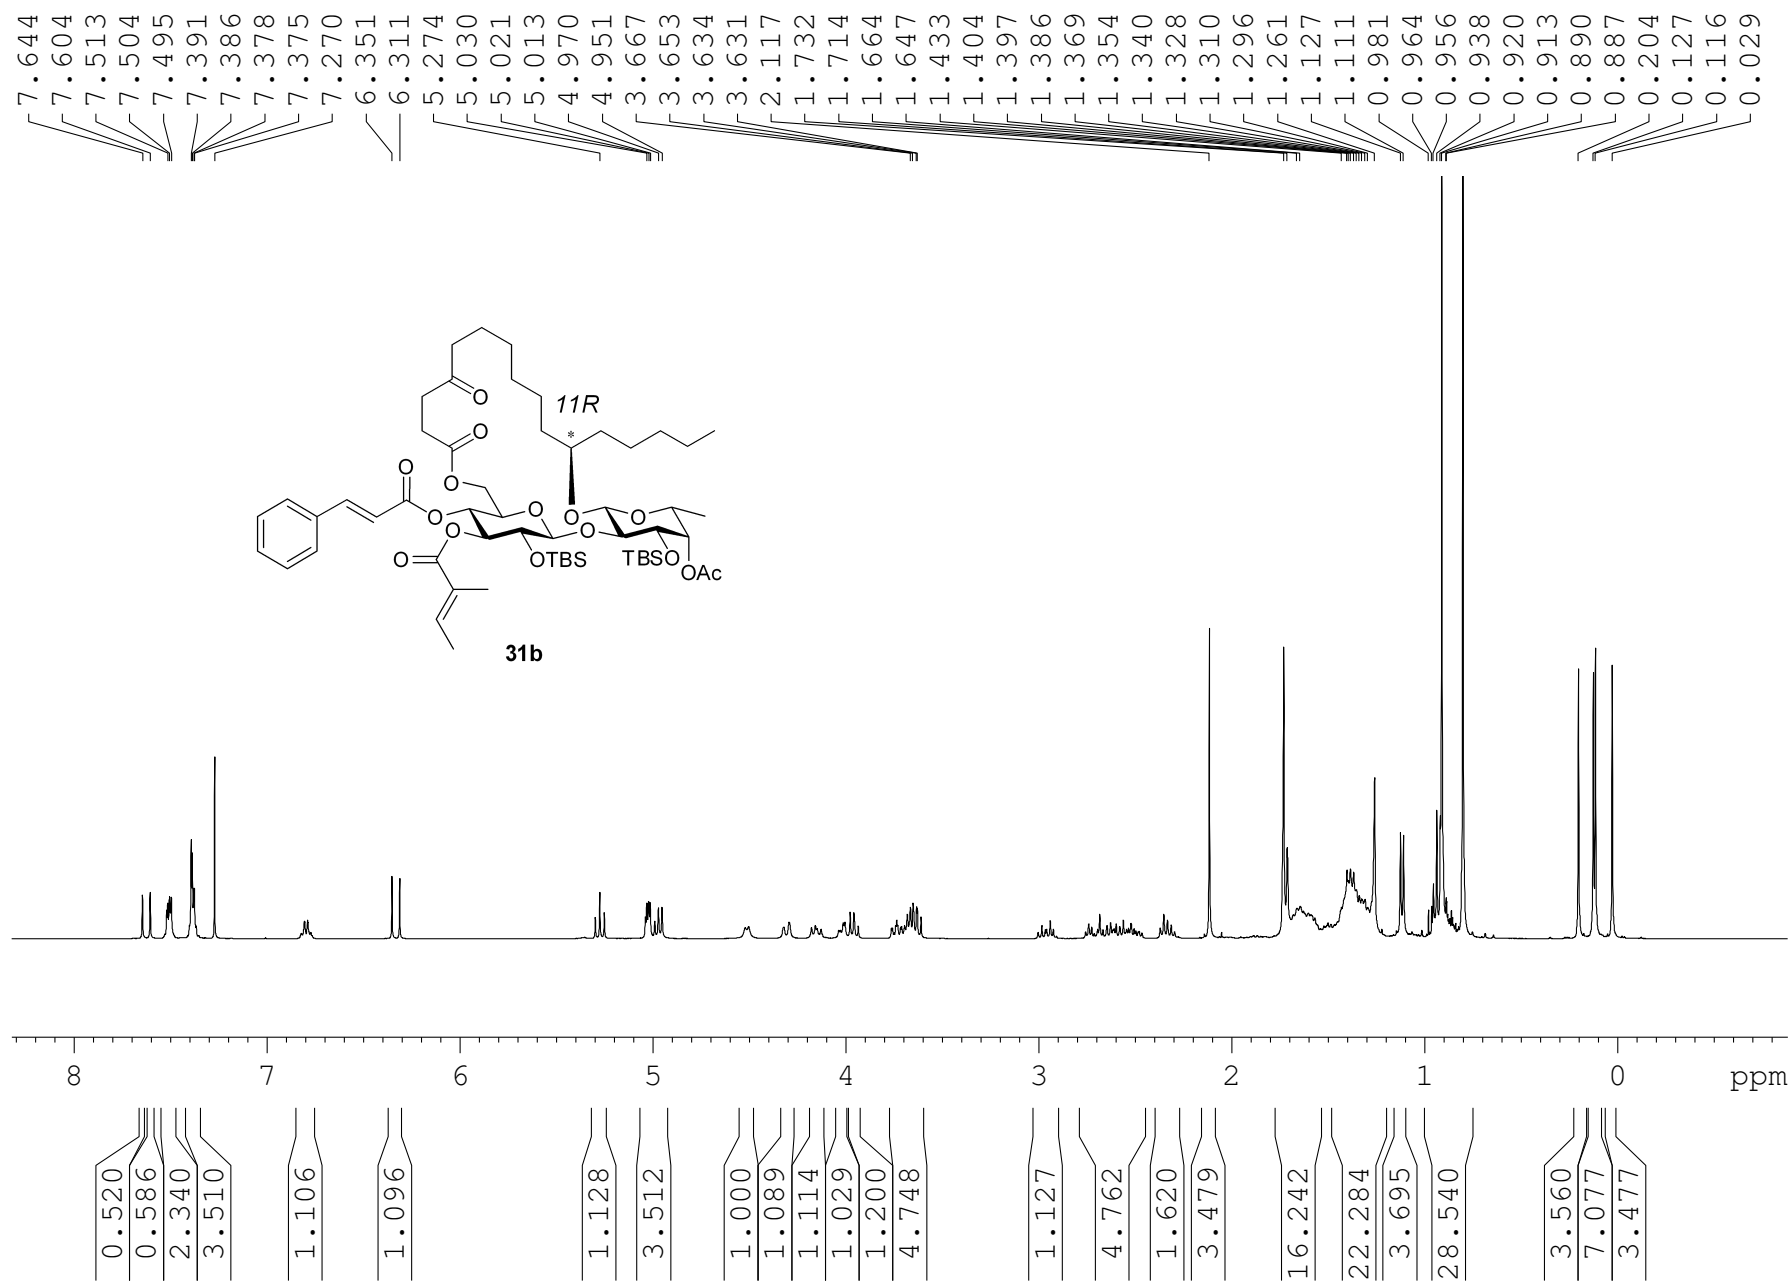

EDB-Ipom-1-67-A-140812 13C in CDCl3

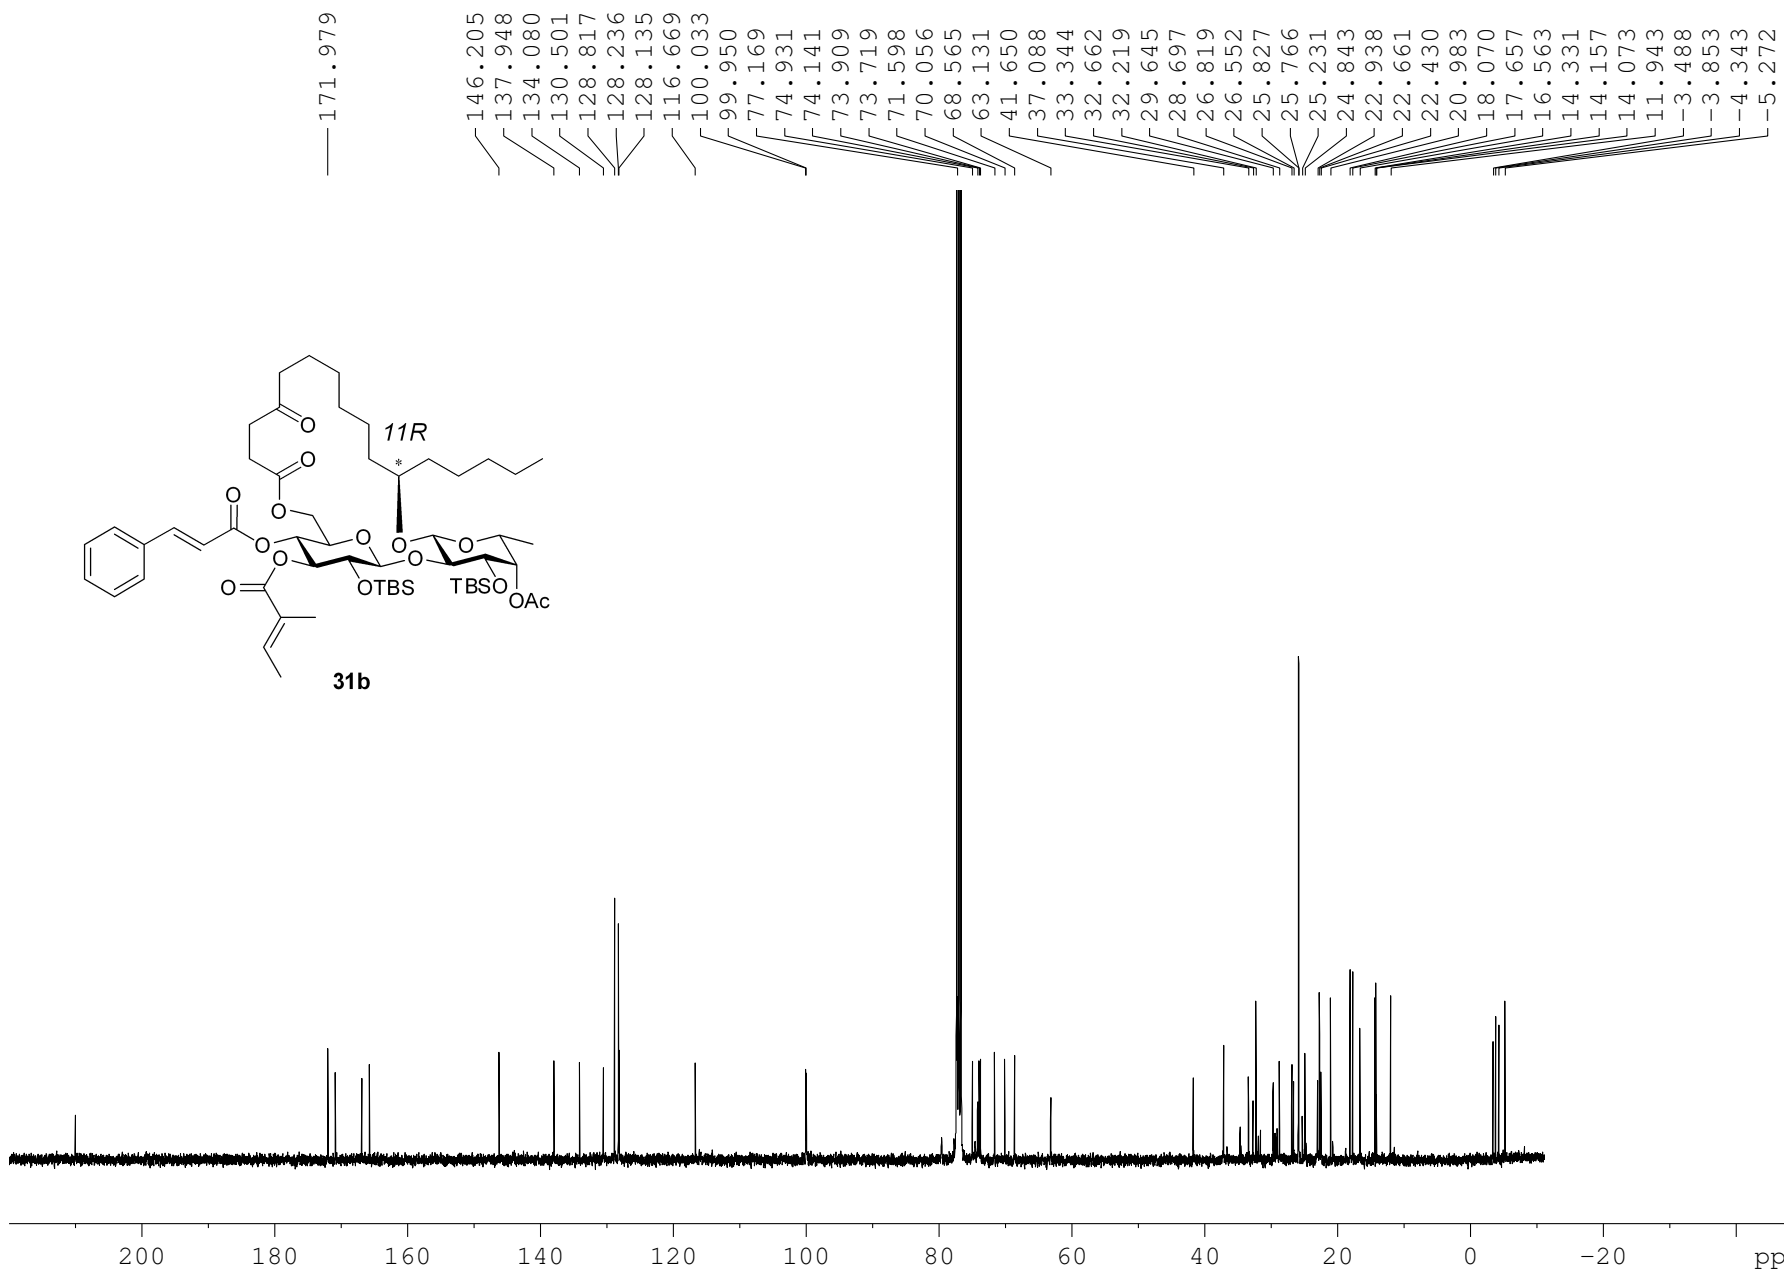

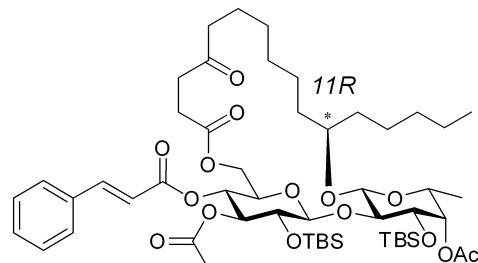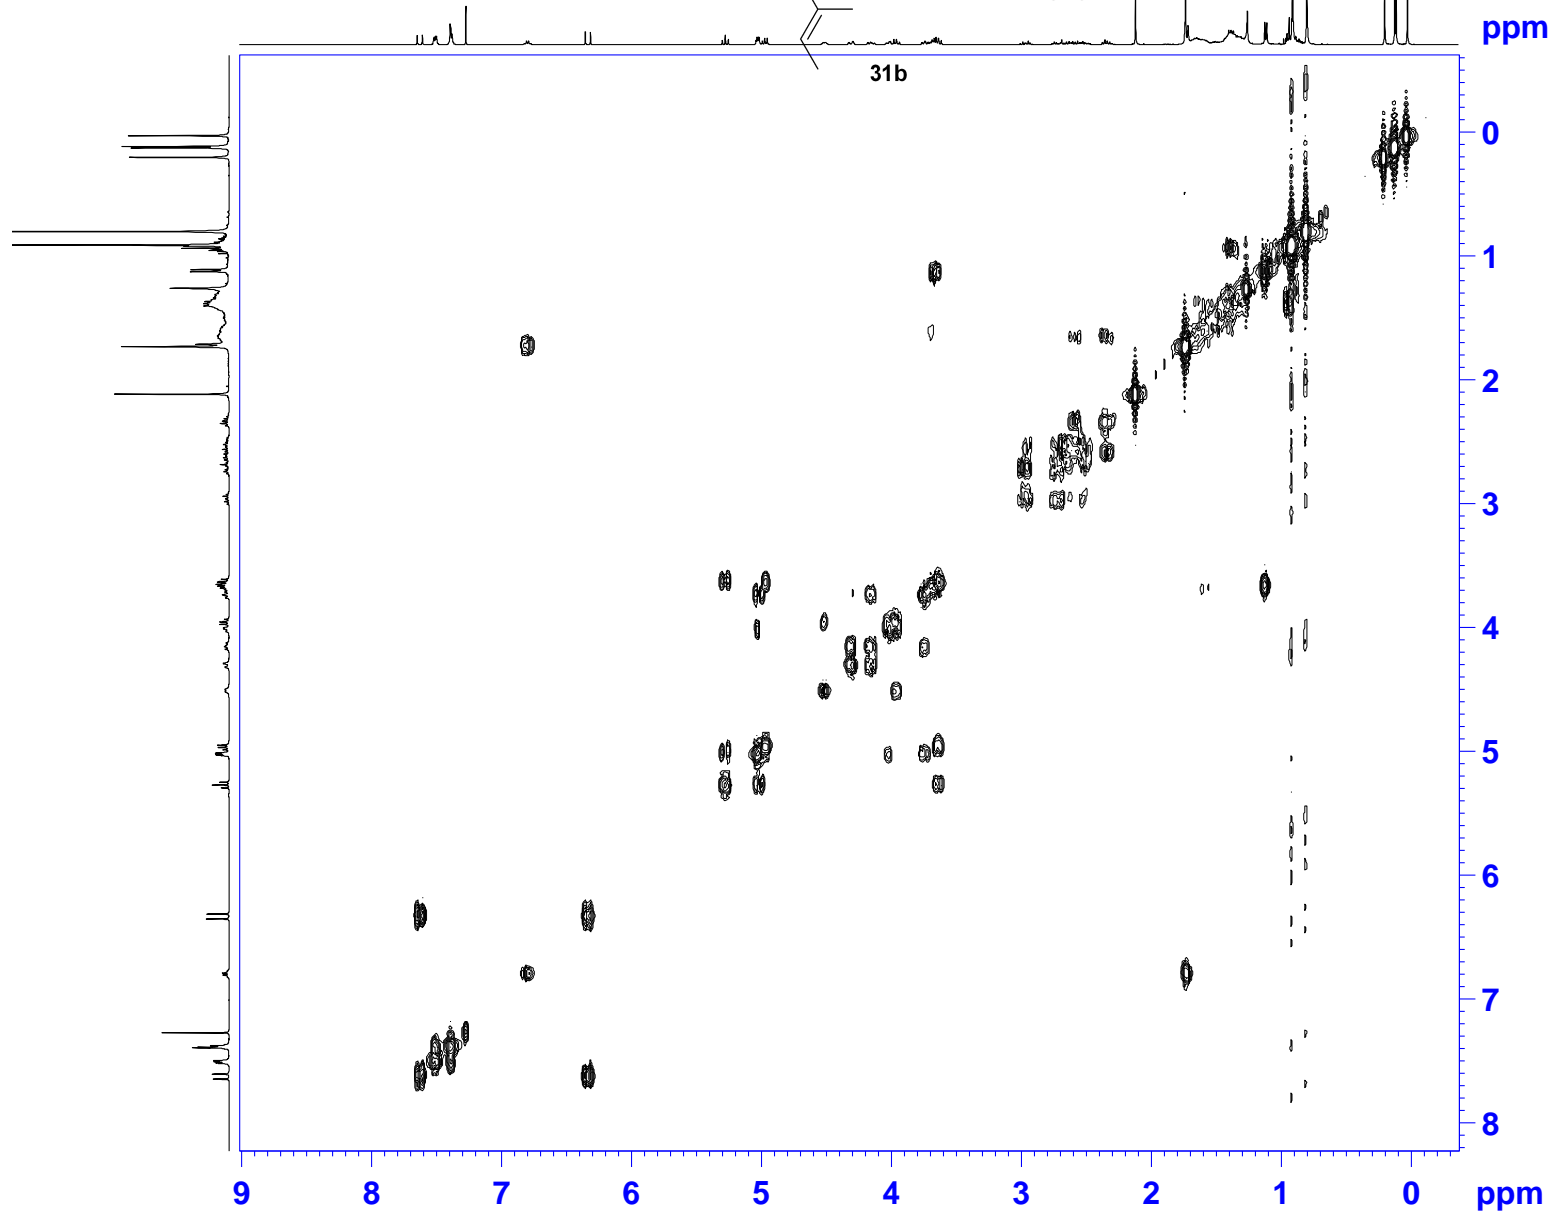

NAME EDB-Ipom-1-67-A-140812  
 EXPNO 3  
 PROCNO 1  
 Date\_ 20140828  
 Time 5.12  
 INSTRUM spect  
 PROBHD 5 mm PABBO BB-  
 PULPROG cosygpdf  
 TD 2048  
 SOLVENT CDCl3  
 NS 2  
 DS 0  
 SWH 5341.880 Hz  
 FIDRES 2.608340 Hz  
 AQ 0.1917428 sec  
 RG 128  
 DW 93.600 usec  
 DE 6.50 usec  
 TE 293.9 K  
 D0 0.00000300 sec  
 D1 1.48689198 sec  
 D13 0.00000400 sec  
 D16 0.00020000 sec  
 INO 0.00018720 sec

==== CHANNEL f1 =====  
 NUC1 1H  
 P0 10.00 usec  
 P1 10.00 usec  
 PL1 -3.50 dB  
 PL1W 31.17620277 W  
 SFO1 400.1324057 MHz

===== GRADIENT CHANNEL =====  
 GPNAM1 SINE.100  
 GPZ1 10.00 %  
 P16 1000.00 usec  
 ND0 1  
 TD 128  
 SFO1 400.1324 MHz  
 FIDRES 41.733440 Hz  
 SW 13.350 ppm  
 FnMODE QF  
 SI 1024  
 SF 400.1300040 MHz  
 WDW SINE  
 SSB 0  
 LB 0.00 Hz  
 GB 0  
 PC 1.00  
 SI 1024  
 MC2 QF  
 SF 400.1300033 MHz  
 WDW SINE  
 SSB 0  
 LB 0.00 Hz  
 GB 0

ZGH-*Ipom-2-34-A* 1H in CDCl<sub>3</sub>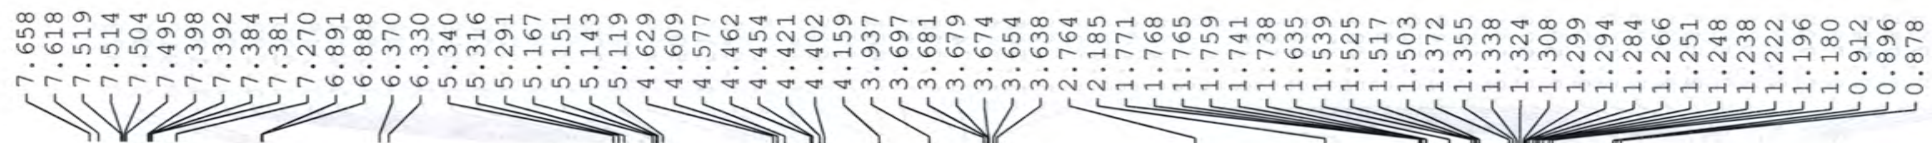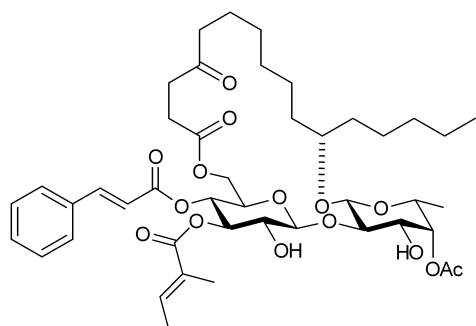

Ipomoeassin F

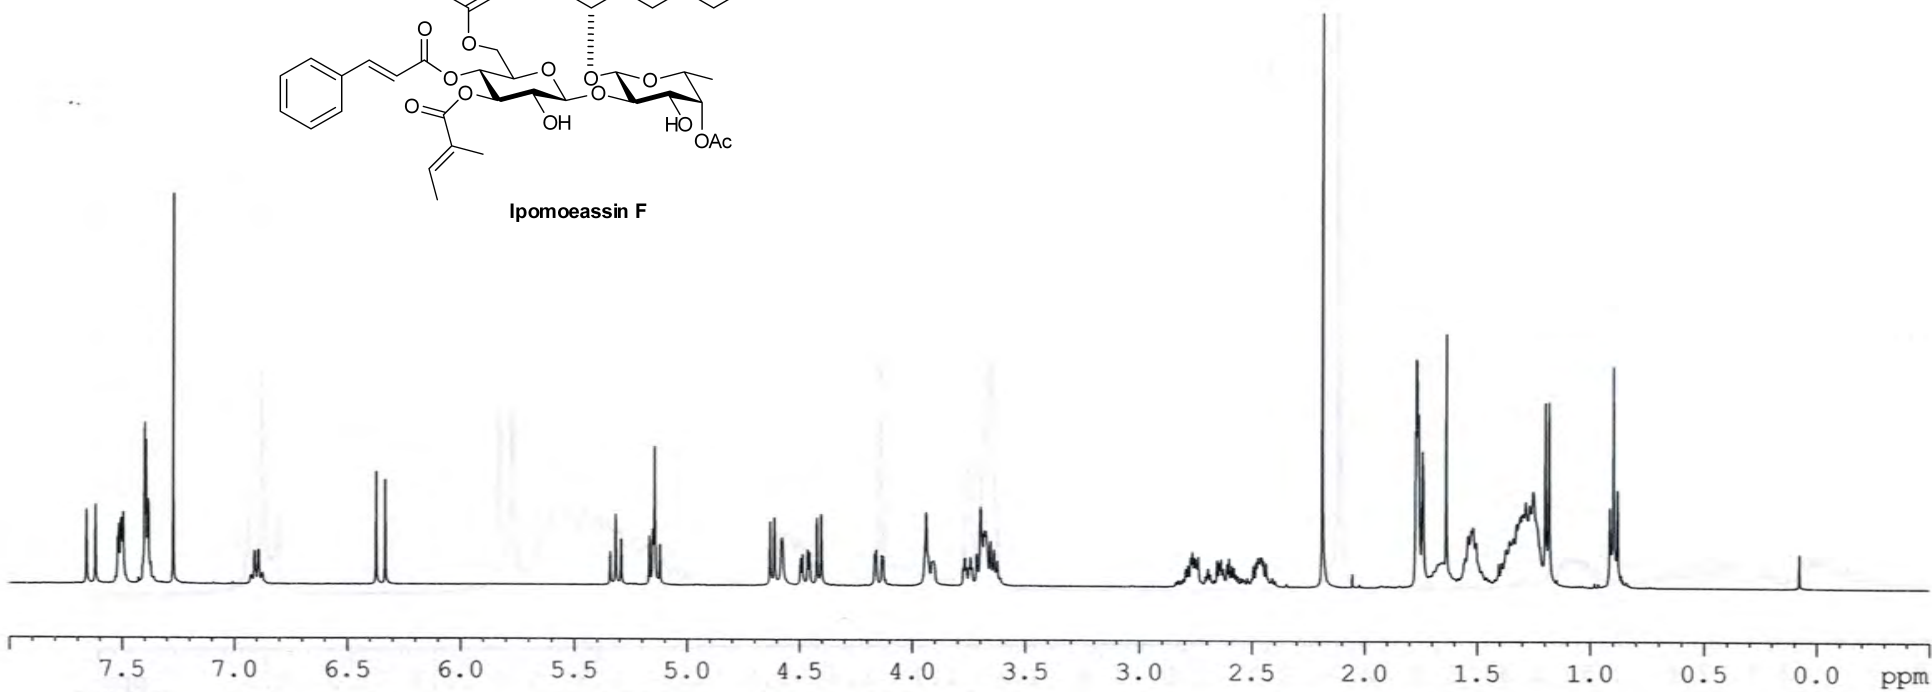1.013  
2.006  
2.982

0.972

0.993

1.000

1.962

0.979

1.022

0.989

1.048

1.016

2.033

0.984

4.106

6.156

3.021

5.907

1.561

1.202

0.430

4.047

12.339

3.266

3.309

ZGH-Ipom-2-34-A-140215 check again

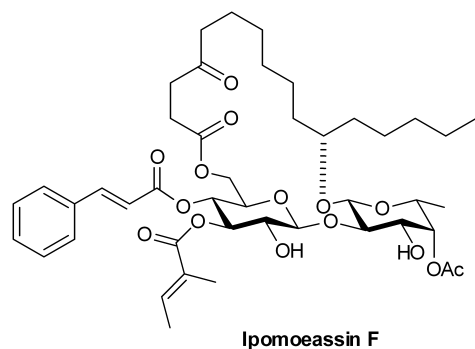

Ipomoeassin F

— 210.010

171.786  
171.693  
168.796  
165.409

— 146.125  
— 139.782  
— 133.964  
— 130.624  
— 128.874  
— 128.246  
— 127.536  
— 116.666

— 105.679  
— 100.182  
82.767  
79.732  
77.319  
77.204  
77.001  
76.683  
75.817  
73.943  
72.692  
72.569  
72.435  
68.790  
67.444  
61.752  
41.827  
37.564  
34.322  
33.083  
31.892  
29.118  
29.019  
28.291  
24.675  
24.483  
23.465  
22.635  
20.929  
16.327  
14.581  
14.086  
11.954

210 200 190 180 170 160 150 140 130 120 110 100 90 80 70 60 50 40 30 20 10 ppm

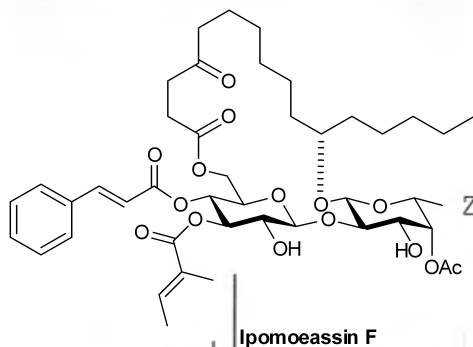

ZGH-Ipom-2-34-A COSY in CDC13

ppm

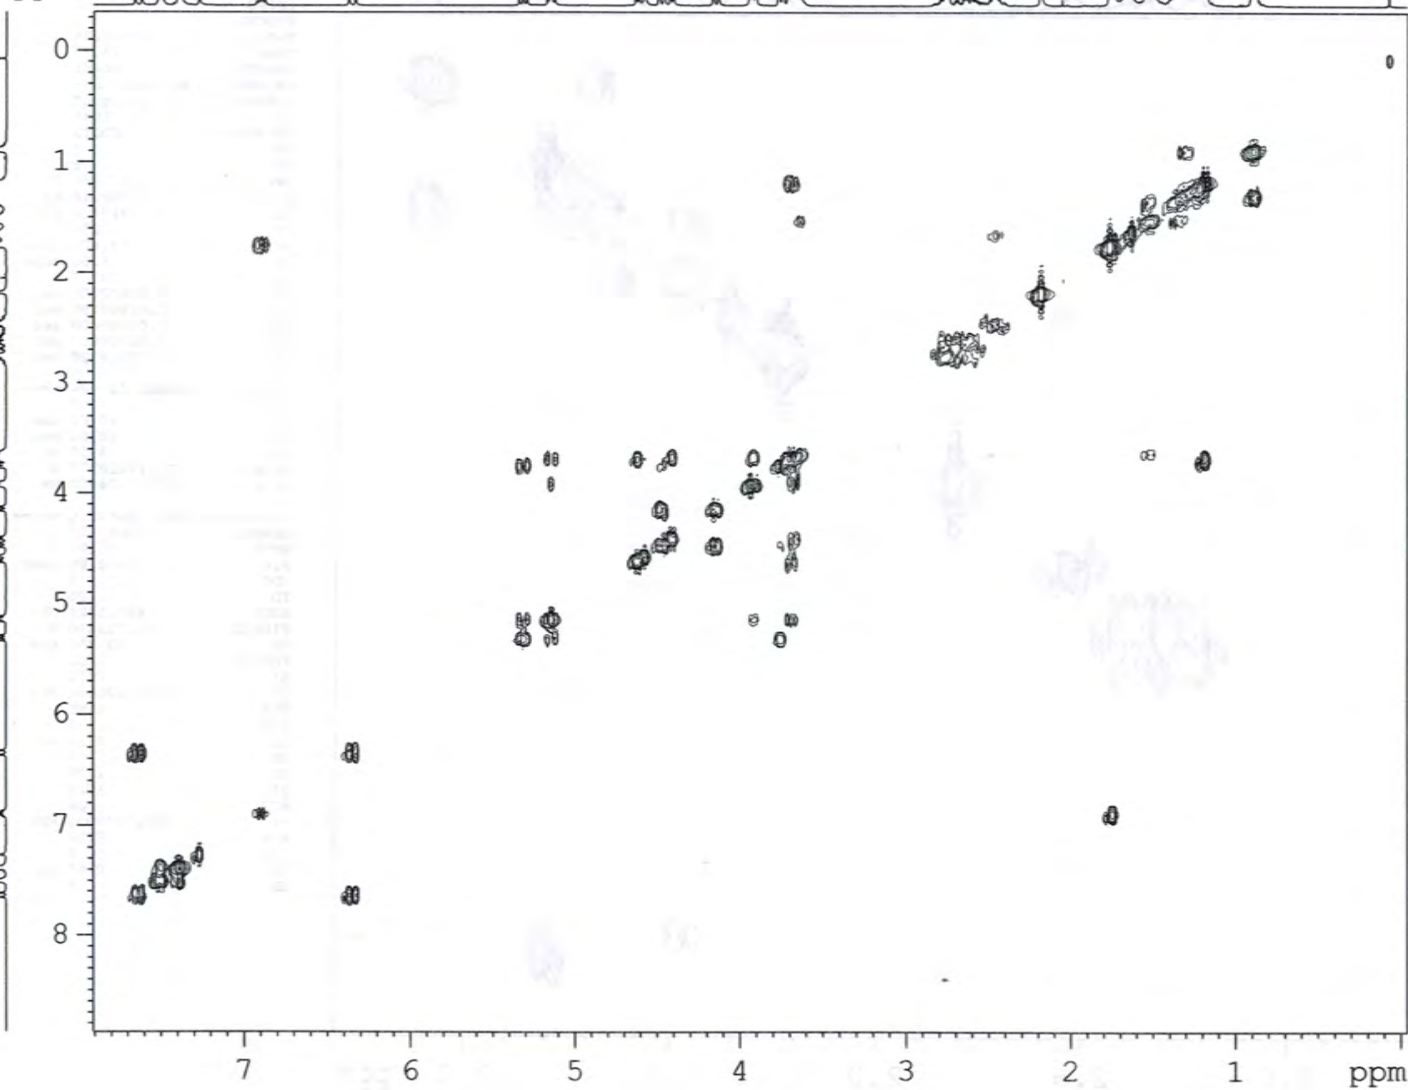

NAME ZGH-Ipom-2-34-A check again  
 EXPNO 2  
 PROCNO 1  
 Date\_ 20141204  
 Time\_ 23.23  
 INSTRUM spect  
 PROBHD 5 mm PABBO BB-  
 PULPROG cosygpgf  
 TD 2048  
 SOLVENT CDC13  
 NS 8  
 DS 8  
 SWH 5341.880 Hz  
 FIDRES 2.608340 Hz  
 AQ 0.1917428 sec  
 RG 256  
 DW 93.600 usec  
 DE 6.50 usec  
 TE 292.4 K  
 D0 0.00000300 sec  
 D1 1.48689198 sec  
 D13 0.00000400 sec  
 D16 0.00020000 sec  
 IN0 0.00018720 sec

===== CHANNEL f1 =====  
 NUC1 1H  
 P0 10.00 usec  
 P1 10.00 usec  
 PL1 -3.50 dB  
 PL1W 31.17620277 W  
 SF01 400.1324057 MHz

===== GRADIENT CHANNEL =====  
 GPNAM1 SINE.100  
 GPZ1 10.00 %  
 P16 1000.00 usec  
 NDO 1  
 TD 128  
 SF01 400.1324 MHz  
 FIDRES 41.733440 Hz  
 SW 13.350 ppm  
 FwMODE QF  
 SI 1024  
 SF 400.1300040 MHz  
 WDW SINE  
 SSB 0  
 LB 0.00 Hz  
 GB 0  
 PC 1.00  
 SI 1024  
 MC2 QF  
 SF 400.1300033 MHz  
 WDW SINE  
 SSB 0  
 LB 0.00 Hz  
 GB 0

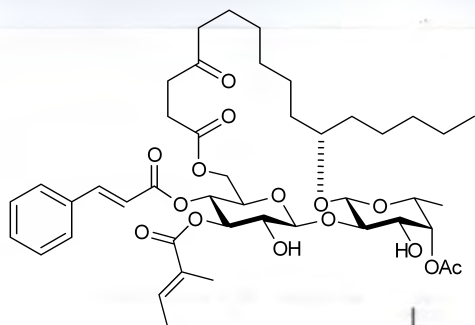

Ipomoeassin F

ZGH-*Ipom-2-34-A* HSQC in CDCl<sub>3</sub>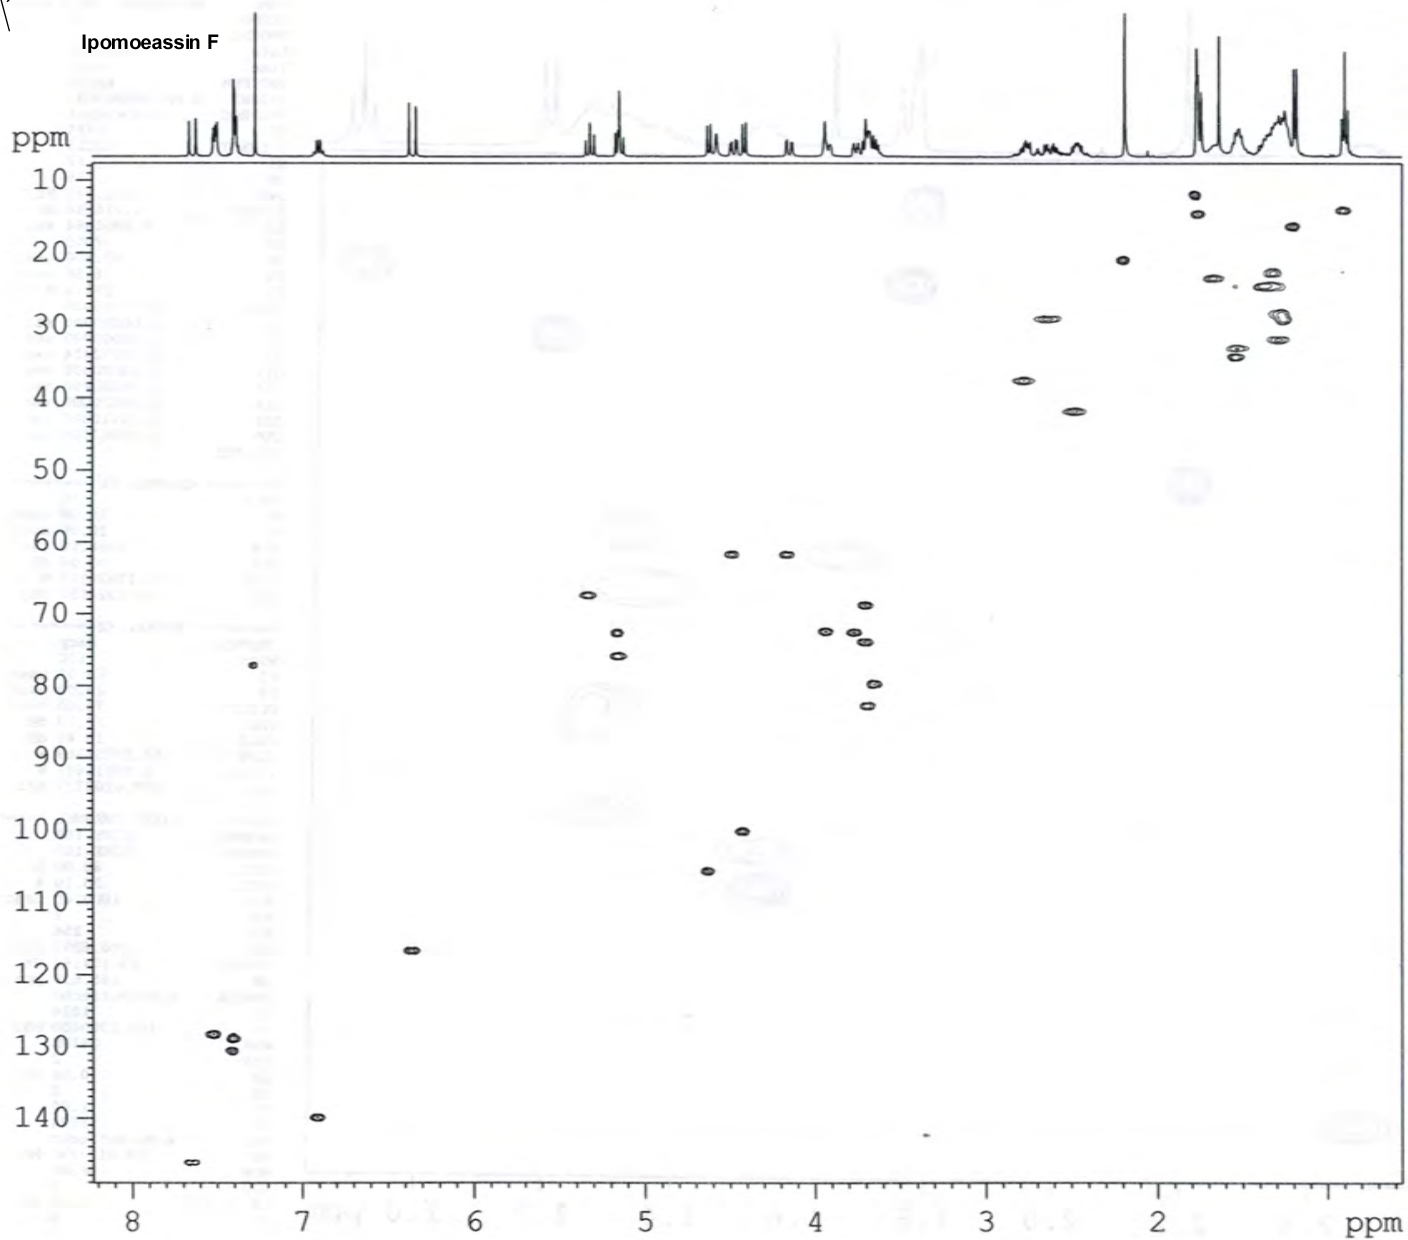

NAME ZGH-*Ipom-2-34-A* check again  
 EXPNO 4  
 PROCNO 1  
 Date\_ 20141205  
 Time\_ 6.51  
 INSTRUM spect  
 PROBHD 5 mm PABBO BB-  
 PULPROG hsqcetgpsi  
 TD 1024  
 SOLVENT CDCl3  
 NS 12  
 DS 16  
 SWH 5341.880 Hz  
 FIDRES 5.216680 Hz  
 AQ 0.0958964 sec  
 RG 2050  
 DW 93.600 usec  
 DE 6.50 usec  
 TE 292.4 K  
 CNST2 145.0000000  
 D0 0.000003000 sec  
 D1 1.500000000 sec  
 D4 0.00172414 sec  
 D11 0.030000000 sec  
 D13 0.000004000 sec  
 D16 0.000200000 sec  
 D24 0.001100000 sec  
 IN0 0.000030000 sec  
 ZGPTNS

===== CHANNEL f1 =====  
 NUC1 1H  
 P1 10.00 usec  
 P2 20.00 usec  
 P28 1000.00 usec  
 PL1 -3.50 dB  
 PL1W 31.17620277 W  
 SFO1 400.1324057 MHz

===== CHANNEL f2 =====  
 CPDPRG2 garp  
 NUC2 13C  
 P3 10.00 usec  
 P4 20.00 usec  
 PCPD2 75.00 usec  
 PL2 -2.10 dB  
 PL12 15.40 dB  
 PL2W 58.37759399 W  
 PL12W 1.03811681 W  
 SFO2 100.6202727 MHz

===== GRADIENT CHANNEL =====  
 GPNAM1 SINE.100  
 GPNAM2 SINE.100  
 GPZ1 80.00 %  
 GPZ2 20.10 %  
 P16 1000.00 usec  
 NDO 2  
 TD 256  
 SFO1 100.6203 MHz  
 FIDRES 65.104164 Hz  
 SW 165.639 ppm  
 PnMODE Echo-Antiecho  
 SI 1024  
 SF 400.1300000 MHz  
 WDW QSINE  
 SSB 2  
 LB 0.00 Hz  
 GB 0  
 PC 1.00  
 SI 1024  
 MC2 echo-antiecho  
 SF 100.6127690 MHz  
 WDW QSINE  
 SSB 2  
 LB 0.00 Hz  
 GB 0

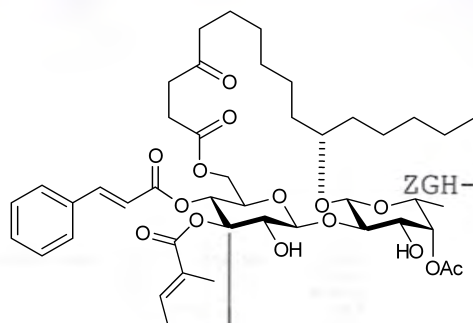ZGH-*Ipom-2-34-A* HMBC in CDCl<sub>3</sub>

NAME ZGH-*Ipom-2-34-A* check again  
 EXPNO 3  
 PROCNO 1  
 Date\_ 20141204  
 Time\_ 23.56  
 INSTRUM spect  
 PROBHD 5 mm PABBO BB-  
 PULPROG hmbcgp1pndqf  
 TD 4096  
 SOLVENT CDCl3  
 NS 100  
 DS 16  
 SWH 5208.333 Hz  
 FIDRES 1.271566 Hz  
 AQ 0.3932660 sec  
 RG 2050  
 DW 96.000 usec  
 DE 6.50 usec  
 TE 292.4 K  
 CNST2 145.0000000  
 CNST13 10.0000000  
 D0 0.00000300 sec  
 D1 1.5000000 sec  
 D2 0.00344828 sec  
 D6 0.05000000 sec  
 D16 0.00020000 sec  
 IN0 0.00003010 sec

===== CHANNEL f1 =====  
 NUC1 1H  
 P1 10.00 usec  
 P2 20.00 usec  
 PL1 -3.50 dB  
 PL1W 31.17620277 W  
 SFO1 400.1325208 MHz

===== CHANNEL f2 =====  
 NUC2 13C  
 P3 10.00 usec  
 PL2 -2.10 dB  
 PL2W 58.37759399 W  
 SFO2 100.6228138 MHz

===== GRADIENT CHANNEL =====  
 GPNAM1 SINE.100  
 GPNAM2 SINE.100  
 GPNAM3 SINE.100  
 GPZ1 50.00 %  
 GPZ2 30.00 %  
 GPZ3 40.10 %  
 P16 1000.00 usec  
 ND0 2  
 TD 128  
 SFO1 100.6228 MHz  
 FIDRES 129.709091 Hz  
 SW 165.000 ppm  
 FMODE QF  
 SI 2048  
 SF 400.1300000 MHz  
 WDW SINE  
 SSB 0  
 LB 0.00 Hz  
 GB 0  
 PC 4.00  
 SI 1024  
 MC2 QF  
 SF 100.6127690 MHz  
 WDW SINE  
 SSB 0  
 LB 0.00 Hz  
 GB 0

ppm

40

60

80

100

120

140

160

180

ppm

8.0 7.5 7.0 6.5 6.0 5.5 5.0 4.5 4.0 3.5 3.0 2.5 2.0 1.5 1.0



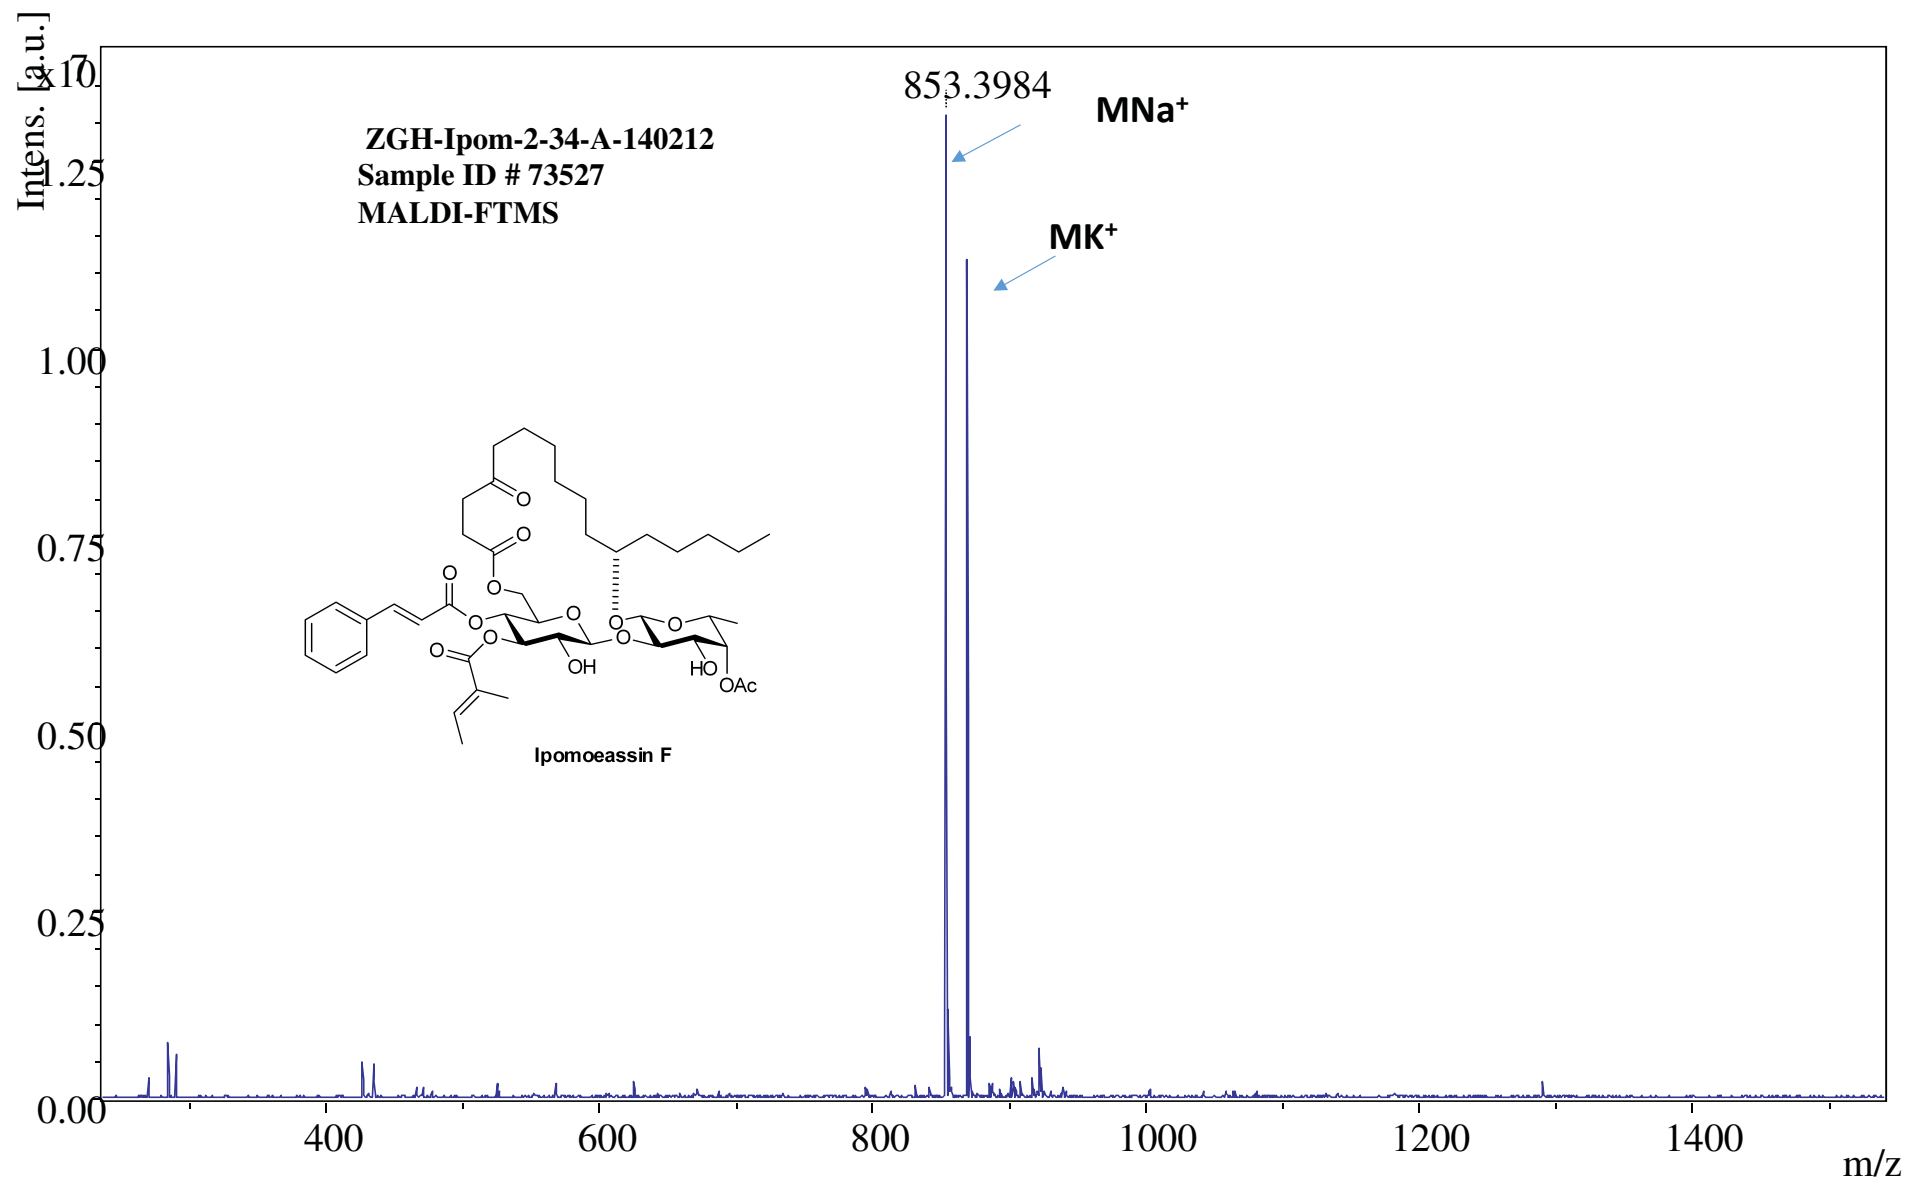

EDB-Ipom-1-68-B-140925 in CDCl<sub>3</sub>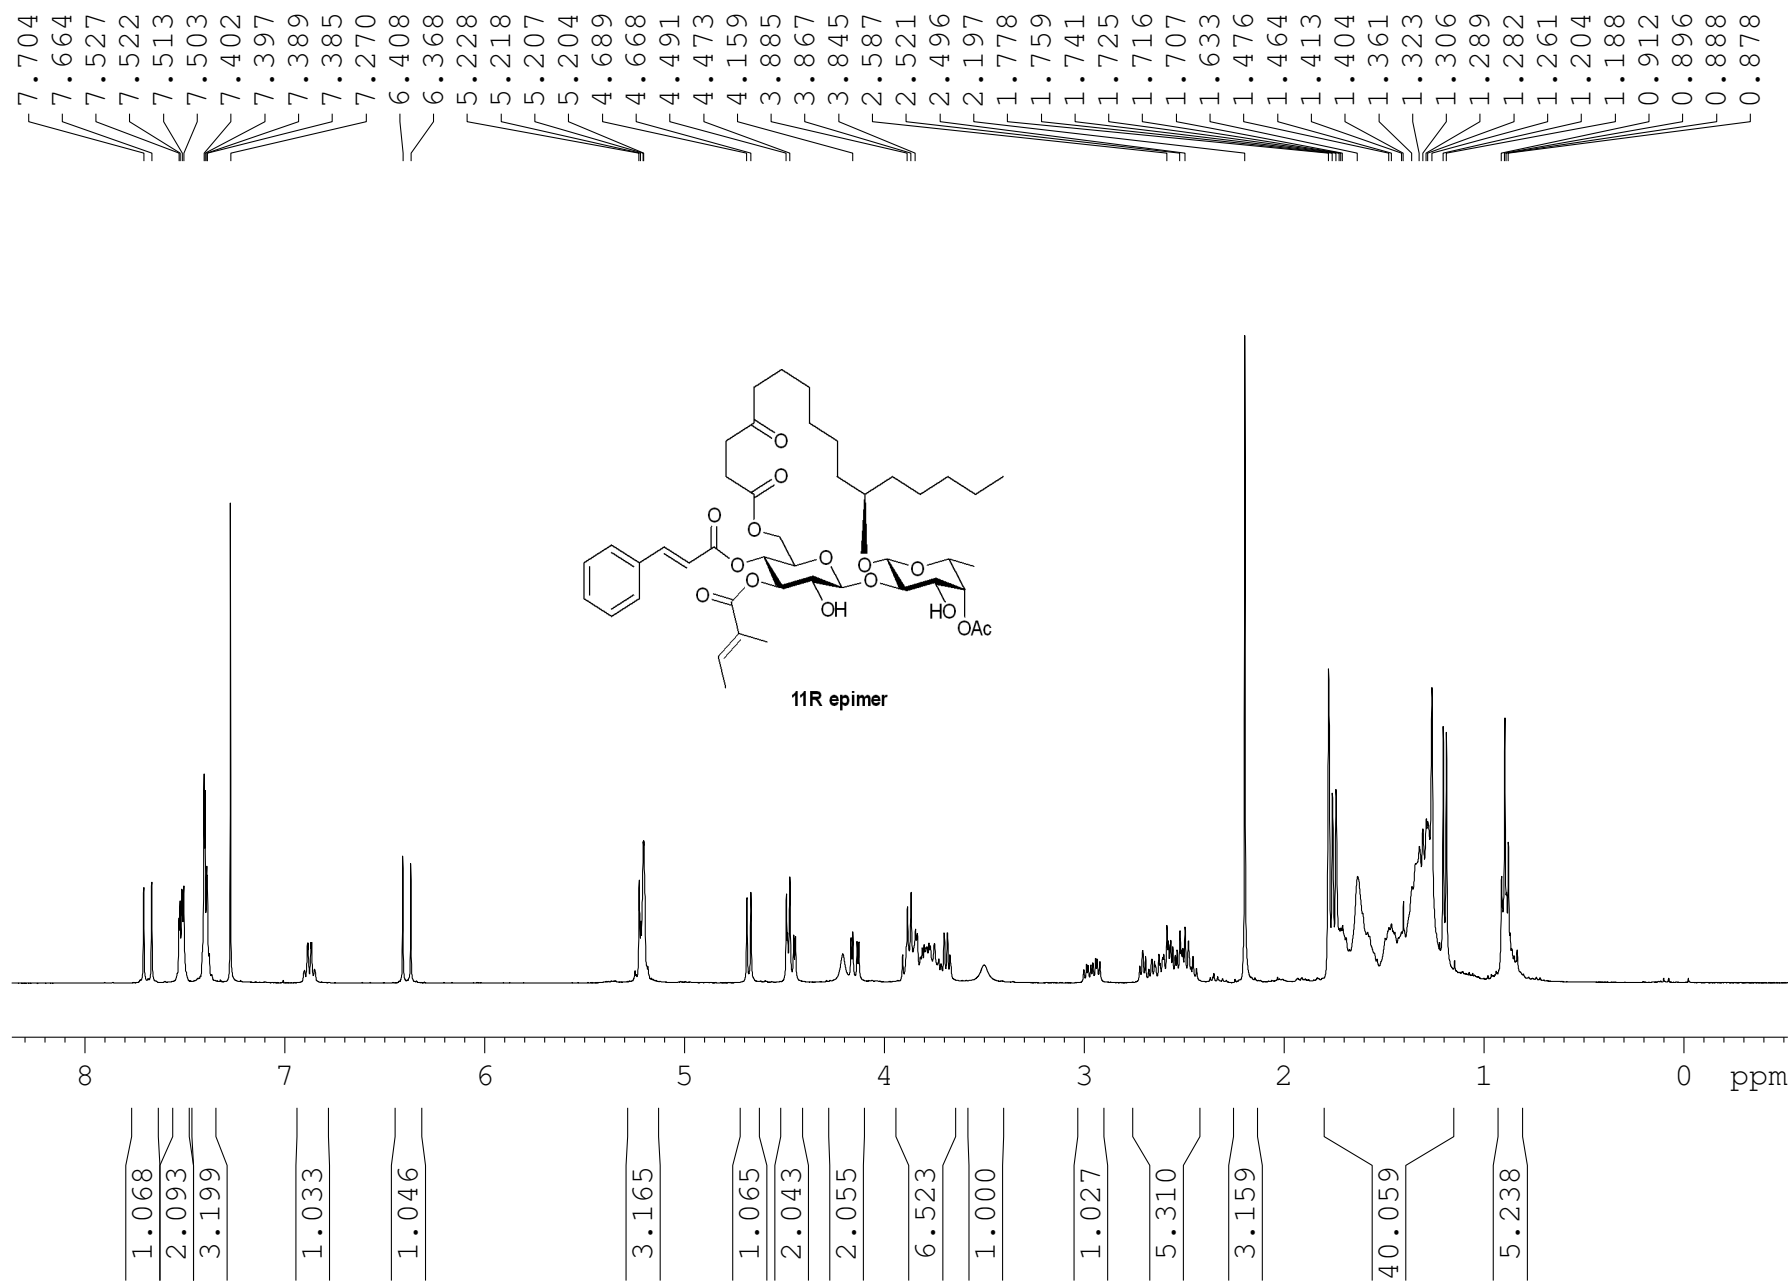

## EDB-Ipom-1-68-C-140925 13C in CDCl3

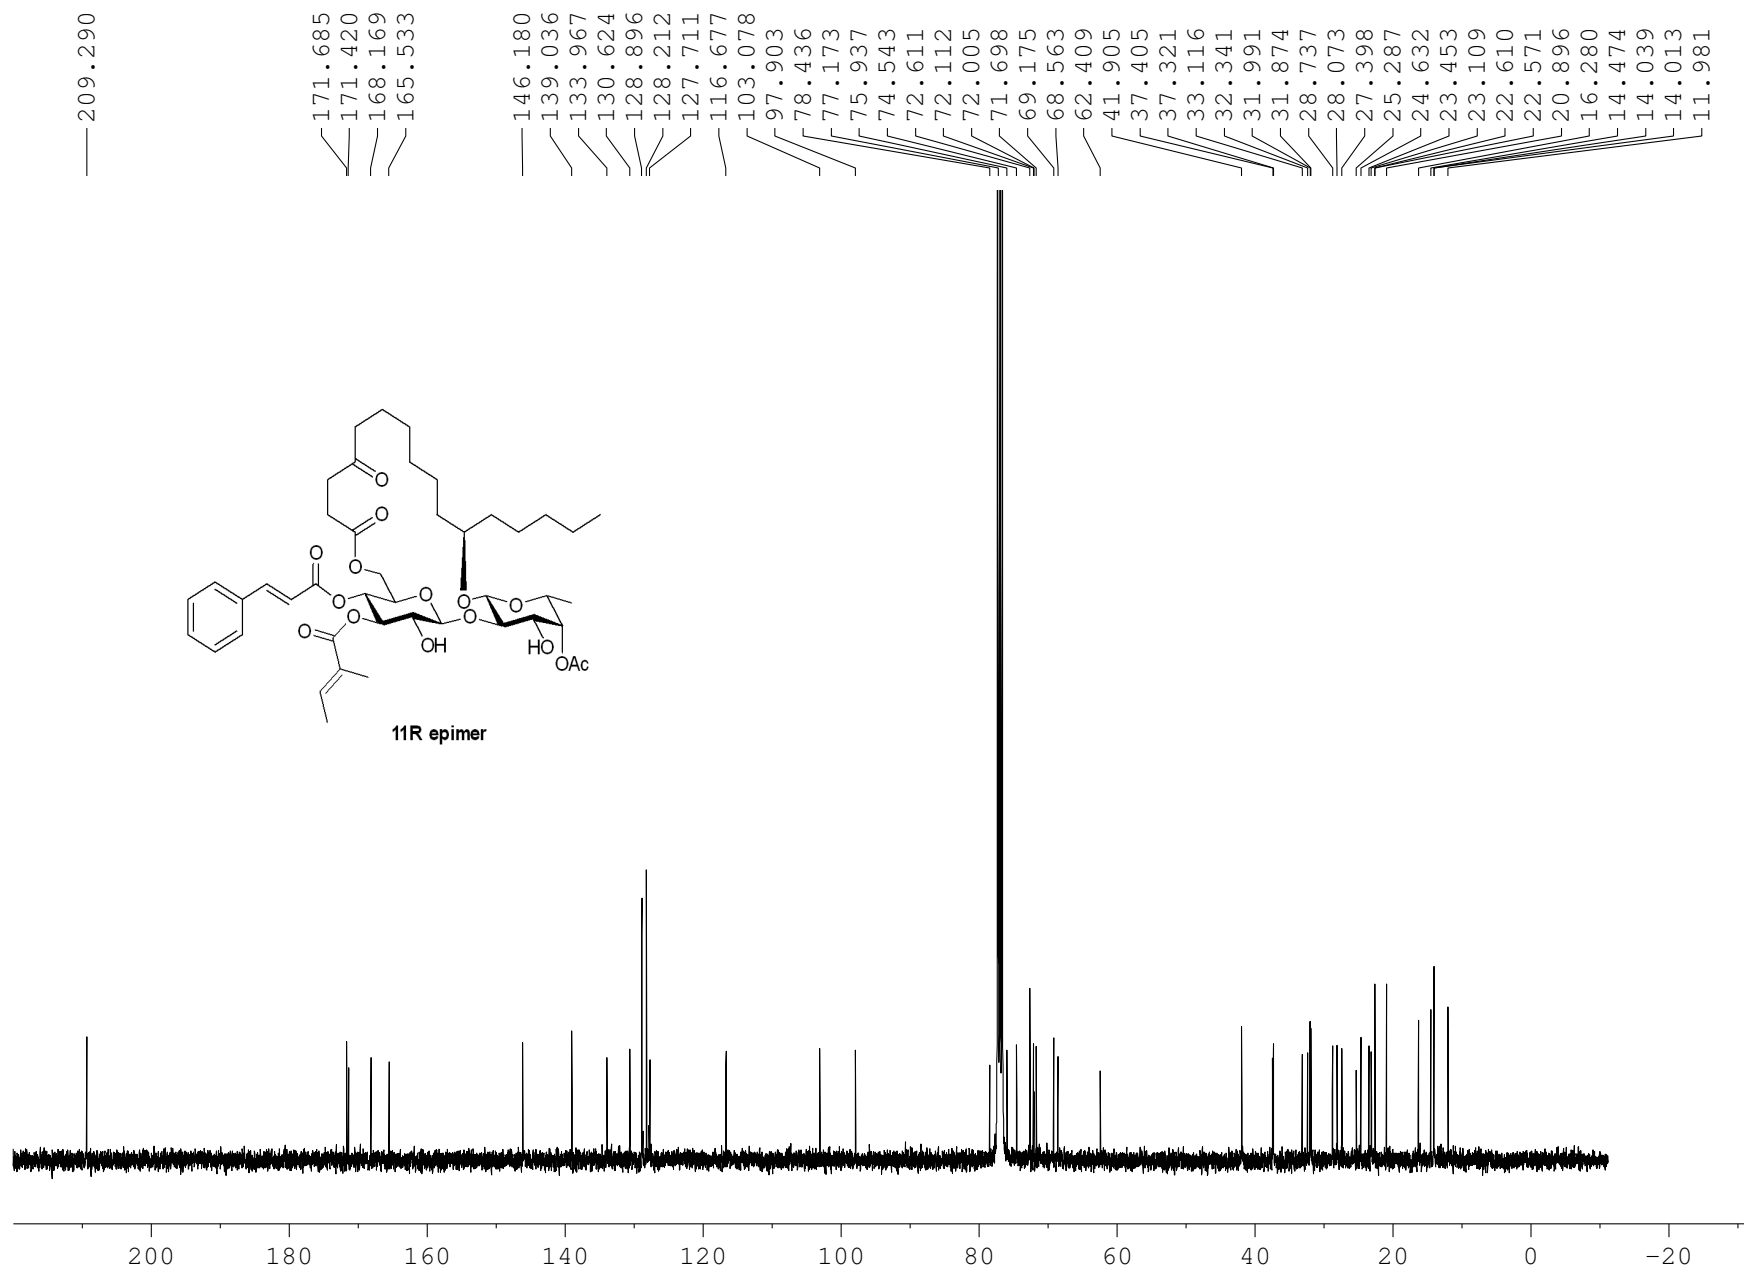

EDB-*Ipom*-1-68-C-140925 CDCL<sub>3</sub>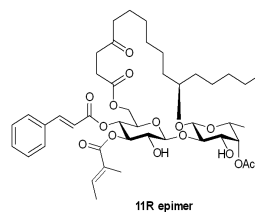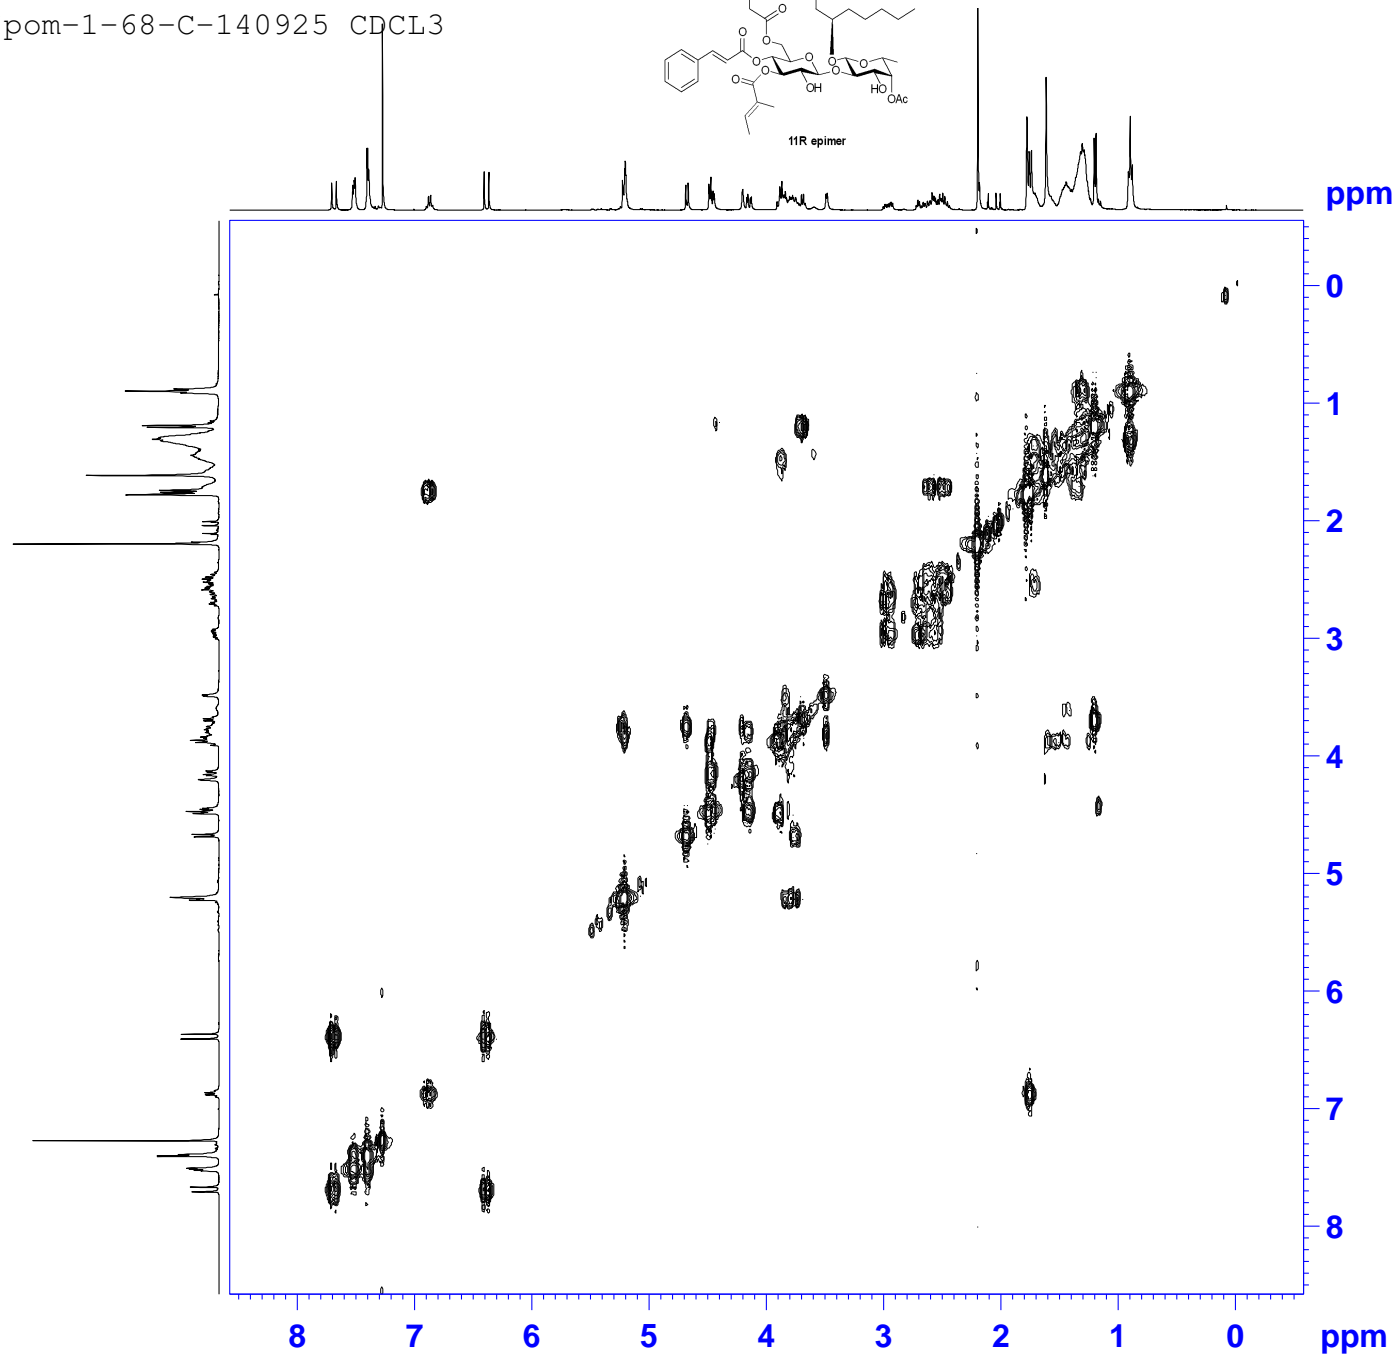

```

NAME      EDB-Ipom-1-68-C-140925
EXPNO     3
PROCNO    1
Date_     20141011
Time      8.23
INSTRUM   spect
PROBHD    5 mm PABBO BB-
PULPROG   cosygpqf
TD         2048
SOLVENT   CDCl3
NS         2
DS         0
SWH        5341.880 Hz
FIDRES     2.608340 Hz
AQ         0.1917428 sec
RG         128
DW         93.600 usec
DE         6.50 usec
TE         293.1 K
D0         0.00000300 sec
D1         1.48689198 sec
D13        0.00000400 sec
D16        0.00020000 sec
IN0        0.00018720 sec

```

```

===== CHANNEL f1 =====
NUC1       1H
P0         10.00 usec
P1         10.00 usec
PL1        -3.50 dB
PL1W       31.17620277 W
SFO1       400.1324057 MHz

```

```

===== GRADIENT CHANNEL =====
GPNAM1     SINE.100
GPZ1       10.00 %
P16        1000.00 usec
ND0         1
TD          128
SFO1       400.1324 MHz
FIDRES     41.733440 Hz
SW         13.350 ppm
FnMODE     QF
SI         1024
SF         400.1300040 MHz
WDW        SINE
SSB         0
LB         0.00 Hz
GB          0
PC          1.00
SI         1024
MC2        QF
SF         400.1300033 MHz
WDW        SINE
SSB         0
LB         0.00 Hz
GB          0

```

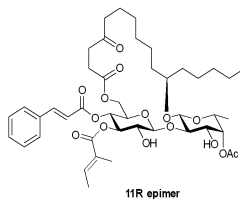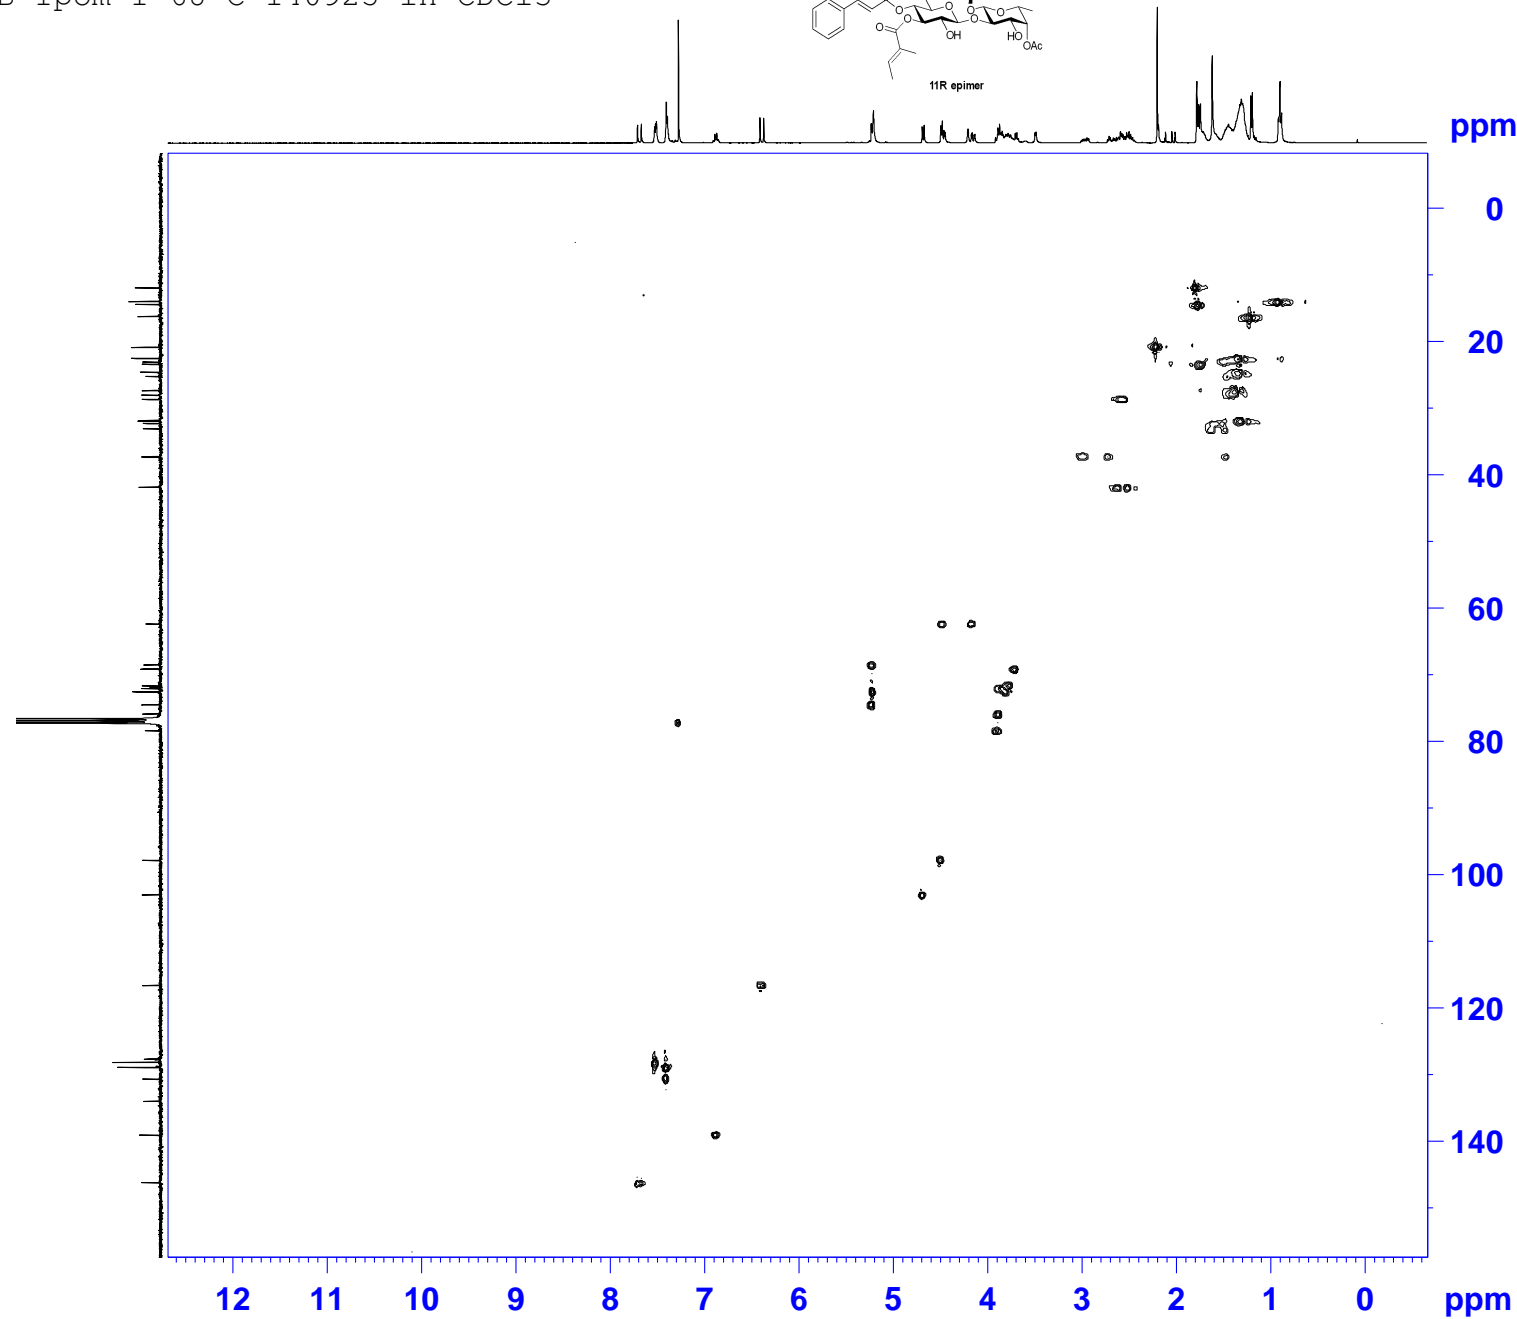

NAME EDB-Ipom-1-68-C-140925  
 EXPNO 4  
 PROCNO 1  
 Date\_ 20141011  
 Time 8.31  
 INSTRUM spect  
 PROBHD 5 mm PABBO BB-  
 PULPROG hsqcetgpsi  
 TD 1024  
 SOLVENT CDCl3  
 NS 2  
 DS 16  
 SWH 5341.880 Hz  
 FIDRES 5.216680 Hz  
 AQ 0.0958964 sec  
 RG 2050  
 DW 93.600 usec  
 DE 6.50 usec  
 TE 292.4 K  
 CNST2 145.000000  
 D0 0.0000300 sec  
 D1 1.5000000 sec  
 D4 0.00172414 sec  
 D11 0.03000000 sec  
 D13 0.0000400 sec  
 D16 0.00020000 sec  
 D24 0.00110000 sec  
 IN0 0.00003000 sec  
 ZGPTNS

==== CHANNEL f1 =====  
 NUC1 1H  
 P1 10.00 usec  
 P2 20.00 usec  
 P28 1000.00 usec  
 PL1 -3.50 dB  
 PL1W 31.17620277 W  
 SFO1 400.1324057 MHz

==== CHANNEL f2 =====  
 CPDPRG2 garp  
 NUC2 13C  
 P3 10.00 usec  
 P4 20.00 usec  
 PCPD2 75.00 usec  
 PL2 -2.10 dB  
 PL12 15.40 dB  
 PL2W 58.37759399 W  
 PL12W 1.03811681 W  
 SFO2 100.6202727 MHz

==== GRADIENT CHANNEL =====  
 GPNAM1 SINE.100  
 GPNAM2 SINE.100  
 GPZ1 80.00 %  
 GPZ2 20.10 %  
 P16 1000.00 usec  
 ND0 2  
 TD 256  
 SFO1 100.6203 MHz  
 FIDRES 65.104164 Hz  
 SW 165.639 ppm  
 FmMODE Echo-Antiecho  
 SI 1024  
 SF 400.1300000 MHz  
 WDW QSINE  
 SSB 2  
 LB 0.00 Hz  
 GB 0  
 PC 1.00  
 SI 1024  
 MC2 echo-antiecho  
 SF 100.6127690 MHz  
 WDW QSINE  
 SSB 2  
 LB 0.00 Hz  
 GB 0

## ESI Mass Spectrum

Sample Name: EI-68  
Sample id#: 982220  
Instrument: ultrOTOF-Q

11/6/2014

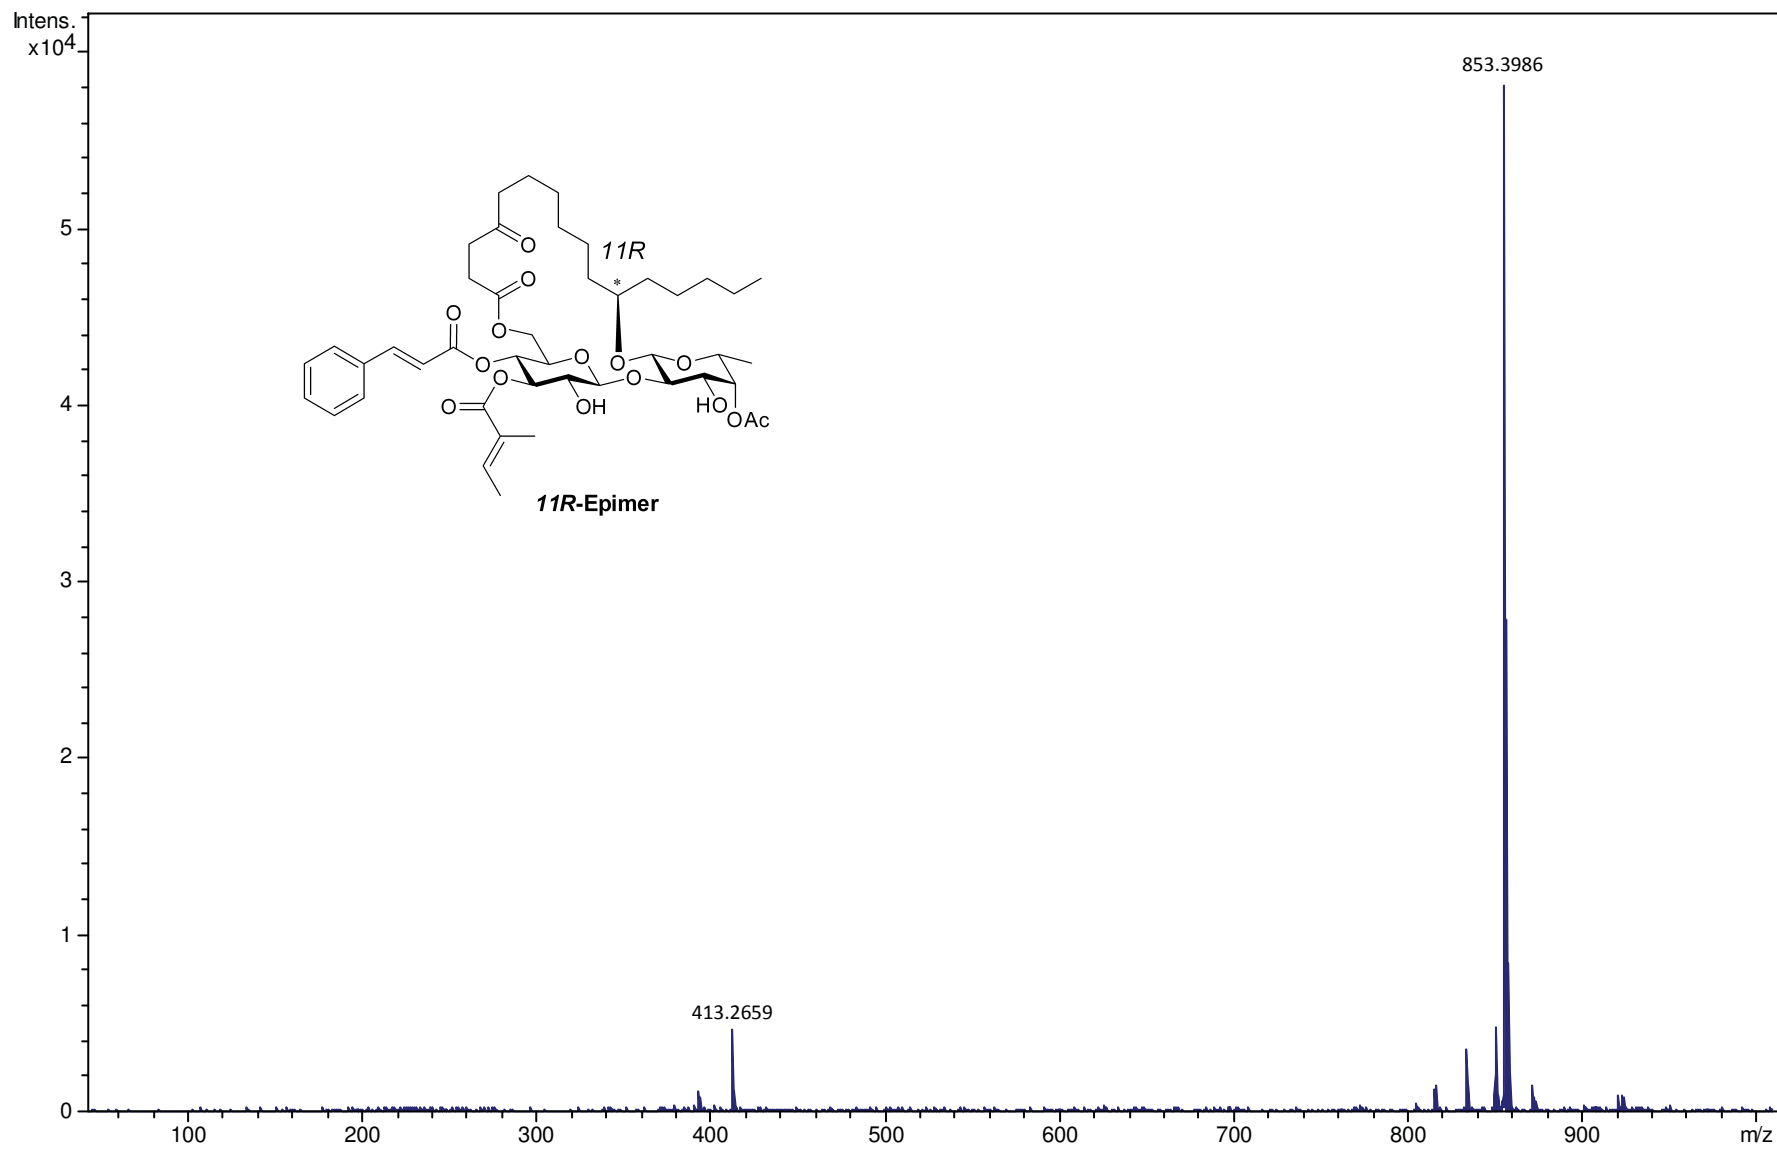

HPLC for **Ipomoeassin F** (96.7%; MeCN/H<sub>2</sub>O 1:9, 0–5 min; increase to 9:1 over 20 min, 5–25 min; 9:1, 25–35 min; finally return to 1:9 in a minute, 35–36 min; 1 mL/min,  $t_R$  = 30.4 min).

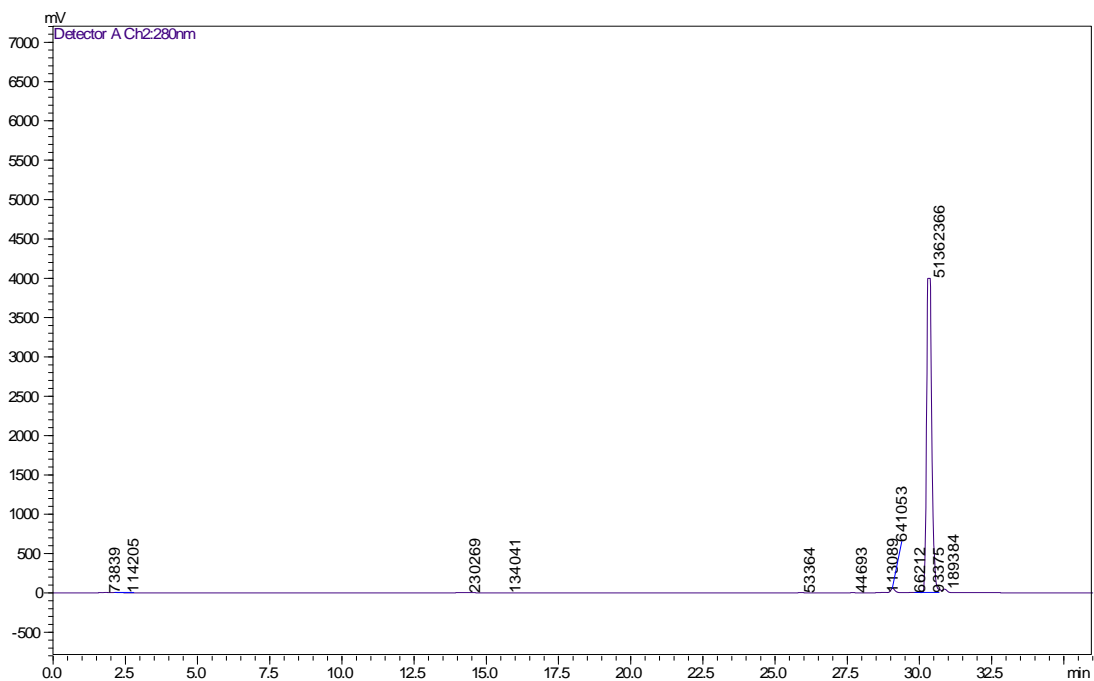

HPLC for **11R-Epimer** (95.3%; MeCN/H<sub>2</sub>O 3:1; 1 mL/min,  $t_R$  = 17.1 min)

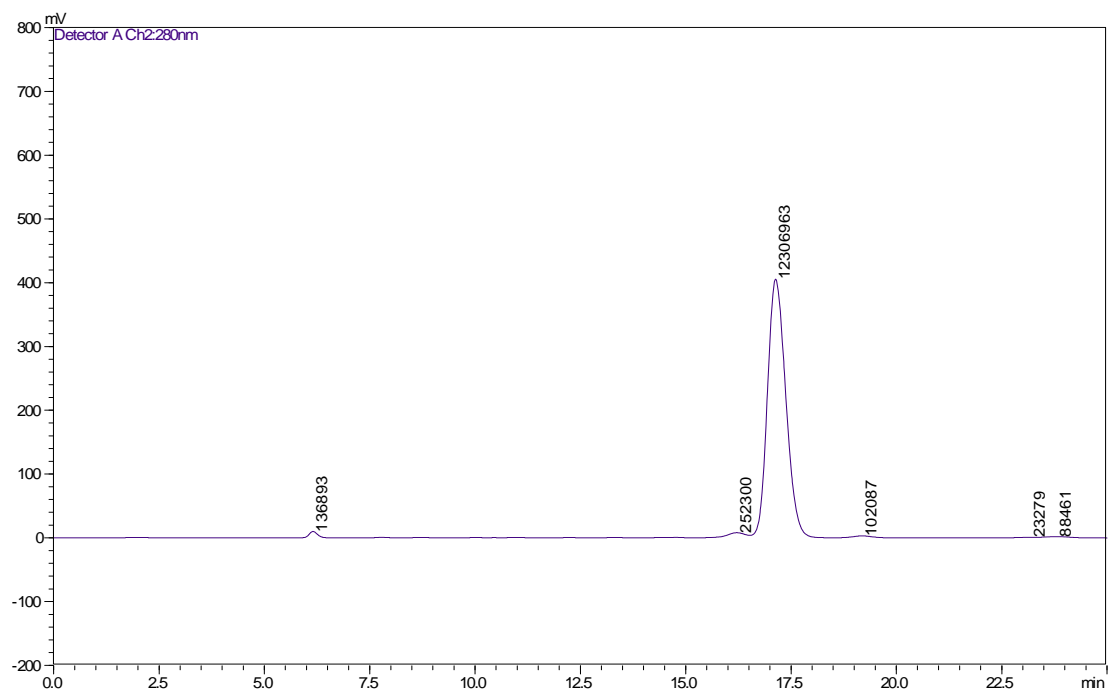

Supplement: NIHMS721006-supplement-Supporting_info.pdf [file NIHMS721006-supplement-Supporting_info.pdf]
